# Supplementary material for: Direct electrochemical synthesis of pentafluorophenyl esters via oxyl-radical-promoted nucleophilic aromatic substitution
Source: Royal Society of Chemistry journal article supplement (doi:10.1039/d5ob00798d), 2025-01-01

## Supporting Information

### **Direct Electrochemical Synthesis of Pentafluorophenyl Esters via Oxyl-Radical-Promoted Nucleophilic Aromatic Substitution**

Edward G. V. Hilvano, Min-Chieh Liang, Jake J. Plane, and Eric D.  
Nacsa\*

*Department of Chemistry, The Pennsylvania State University, University Park, PA 16802,  
United States*

*Corresponding Author Email: [nacsa@psu.edu](mailto:nacsa@psu.edu)*

## Table of Content

|              |                                                                      |             |
|--------------|----------------------------------------------------------------------|-------------|
| <b>I.</b>    | <b>General Information .....</b>                                     | <b>S2</b>   |
| <b>II.</b>   | <b>General Procedures for Pentafluorophenyl Esterification .....</b> | <b>S3</b>   |
| <b>III.</b>  | <b>Electrochemistry Setup .....</b>                                  | <b>S7</b>   |
| <b>IV.</b>   | <b>Optimization .....</b>                                            | <b>S9</b>   |
| <b>V.</b>    | <b>Electrochemical Studies.....</b>                                  | <b>S16</b>  |
| <b>VI.</b>   | <b>Other Mechanistic Studies .....</b>                               | <b>S24</b>  |
| <b>VII.</b>  | <b>Stability Studies.....</b>                                        | <b>S33</b>  |
| <b>VIII.</b> | <b>Derivatization Procedures.....</b>                                | <b>S38</b>  |
| <b>IX.</b>   | <b>Characterization Data for Substrate Scope Entries .....</b>       | <b>S40</b>  |
| <b>X.</b>    | <b>Characterization Data for Z-Phe Derivatives .....</b>             | <b>S71</b>  |
| <b>XI.</b>   | <b>References .....</b>                                              | <b>S76</b>  |
| <b>XII.</b>  | <b>NMR Spectra for Substrate Scope Entries .....</b>                 | <b>S79</b>  |
| <b>XIII.</b> | <b>NMR Spectra for Z-Phe Derivatives .....</b>                       | <b>S197</b> |

## I. General Information

All procedures were performed under air unless stated otherwise. Acetonitrile, dimethylformamide, dimethyl sulfoxide, methanol, tetrahydrofuran, and toluene were dried using a solvent purification system. All starting materials and reagents were used as received. Reactions were monitored by thin-layer chromatography (TLC), gas chromatography-mass spectrometry (GC-MS), or liquid chromatography-mass spectrometry (LC-MS). TLC was performed on Silicycle 250-micron silica-gel F-254 plates and visualized by UV fluorescence (254 nm), KMnO<sub>4</sub> stain or ninhydrin stain for Boc-protected amino acid derived products. GC-MS (electron impact) spectra were recorded on Agilent 8890 GC and 5977B Series MSD systems. Low-resolution mass spectra (LRMS) and the yield for **9** were obtained by <sup>19</sup>F NMR on a Bruker NEO 400 MHz spectrometer against a  $\alpha,\alpha,\alpha$ -trifluorotoluene standard. Organic solutions were concentrated under reduced pressure on a Heidolph rotary evaporator. Chromatographic purification of products was accomplished by flash chromatography on Silicycle F60 silica gel. NMR spectra were recorded on a Bruker NEO 400 MHz spectrometer. Chemical shifts were internally referenced to residual protic solvent signals of CDCl<sub>3</sub> (7.26 ppm for <sup>1</sup>H, 77.16 ppm for <sup>13</sup>C), DMSO-*d*<sub>6</sub> (2.50 ppm for <sup>1</sup>H, 39.53 ppm for <sup>13</sup>C) or CD<sub>3</sub>CN (1.97 ppm for <sup>1</sup>H, 118.26 and 1.32 ppm for <sup>13</sup>C). Data for <sup>1</sup>H NMR are reported as follows: chemical shift ( $\delta$  ppm), integration, multiplicity (s = singlet, d = doublet, t = triplet, q = quartet, m = multiplet, br = broad, app = apparent), and coupling constant (Hz). Data for <sup>13</sup>C NMR are reported in terms of chemical shift and, if applicable, multiplicity and coupling constant (Hz). Cyclic voltammetry (CV) experiments were performed using a CH Instruments 600E electrochemical analyzer, a 3-mm glassy carbon disk working electrode (polished with 0.05- $\mu$ m MicroPolish powder on a Microcloth polishing pad), a platinum-wire counter electrode, and a Ag/AgNO<sub>3</sub> reference electrode with NEt<sub>4</sub>OTs as the electrolyte. Potentials were corrected to SCE by adding 0.05 V (we measured  $E_{1/2}[\text{Fc}^+/\text{Fc}] = +0.35$  V vs. Ag/AgNO<sub>3</sub>, which is at +0.40 V vs. SCE). <sup>1</sup> High-resolution mass spectra (ESI-HRMS) were obtained on a ThermoFisher Scientific UHPLC/QExactive HF-X mass spectrometer equipped with a C<sub>18</sub> column.

## II. General Procedures for Pentafluorophenyl Esterification

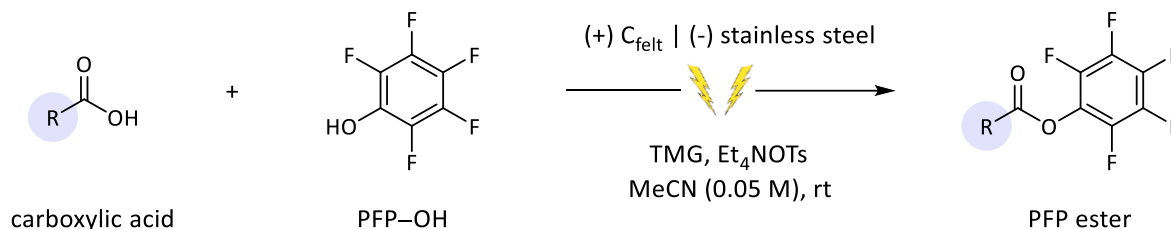

### General Procedure A

Carboxylic acid (0.50 mmol, 1.0 equiv.), tetraethylammonium toluenesulfonate (301.44 mg, 1.0 mmol, 2.0 equiv.), pentafluorophenol (276 mg, 1.50 mmol, 3.0 equiv.), tetramethylguanidine (~62  $\mu$ L, 0.50 mmol, 1 equiv.), and acetonitrile (10 mL, 0.05 M in carboxylic acid) were added to a 20-mL vial equipped with a magnetic stir bar and sealed with a septum cap. The resulting mixture was thoroughly shaken and sparged with nitrogen for 10 minutes. The degassed mixture was electrolyzed (see “Section III. Electrochemistry Setup”) at 3.0 V for 3–4 hours. The electrodes were removed and washed with acetone into the reaction mixture and the solution was concentrated. The residue was purified by silica-gel chromatography with hexanes/ethyl acetate to afford the product. Some products required initial elution with hexanes to remove a yellow oil by-product.

### General Procedure A (Scale-up)

Carboxylic acid (2.00 mmol, 1.0 equiv.), tetraethylammonium toluenesulfonate (1.21 g, 4.00 mmol, 2.0 equiv.), pentafluorophenol (1.10 g, 6.00 mmol, 3.0 equiv.), tetramethylguanidine (~0.25 mL, 2 mmol, 1 equiv.), and acetonitrile (40 mL, 0.05 M in carboxylic acid) were added to a 55-mL test tube equipped with a magnetic stir bar and sealed with a 24/40 septum. The resulting mixture was thoroughly shaken and sparged with nitrogen for 10 minutes. The degassed mixture was electrolyzed (see “Section III. Electrochemistry Setup”) at 3.0 V for 6–8 hours. The electrodes were removed and washed with acetone into the reaction mixture and the solution was concentrated. The residue was purified by silica-gel chromatography with hexanes/ethyl acetate to afford the product. Some products required initial elution with hexanes to remove a yellow oil by-product.



## General Procedure B

Carboxylic acid (0.50 mmol, 1.0 equiv.), tetraethylammonium toluenesulfonate (301.44 mg, 1.0 mmol, 2.0 equiv.), pentafluorophenol (276 mg, 1.50 mmol, 3.0 equiv.), tetramethylguanidine (~62  $\mu$ L, 0.50 mmol, 1 equiv.), and acetonitrile (10 mL, 0.05 M in carboxylic acid) were added to a 20-mL vial equipped with a magnetic stir bar and sealed with a septum cap. The resulting mixture was thoroughly shaken and sparged with nitrogen for 10 minutes. The degassed mixture was electrolyzed (see “Section III. Electrochemistry Setup”) at 3.0 V for 3 hours. Additional pentafluorophenol (184 mg, 1.00 mmol, 2.0 equiv.) and tetramethylguanidine (~31  $\mu$ L, 0.25 mmol, 0.5 equiv.) was added to the reaction mixture. The solution was sparged and sealed and was electrolyzed for 1–1.5 hours until the reaction yield plateaued. The electrodes were removed and washed with acetone into the reaction mixture and the solution was concentrated. The residue was purified by silica-gel chromatography with hexanes/ethyl acetate to afford the product. Some products required initial elution with hexanes to remove a yellow oil by-product.

## General Procedure B (Scale-up)

Carboxylic acid (2.00 mmol, 1.0 equiv.), tetraethylammonium toluenesulfonate (1.21 g, 4.00 mmol, 2.0 equiv.), pentafluorophenol (1.10 g, 6.00 mmol, 3.0 equiv.), tetramethylguanidine (~0.25 mL, 2 mmol, 1 equiv.), and acetonitrile (40 mL, 0.05 M in carboxylic acid) were added to a 55-mL test tube equipped with a magnetic stir bar and sealed with a 24/40 septum. The resulting mixture was thoroughly shaken and sparged with nitrogen for 10 minutes. The degassed mixture was electrolyzed (see “Section III. Electrochemistry Setup”) at 3.0 V for 6–8 hours. Additional pentafluorophenol (552 mg, 3.00 mmol, 2.0 equiv.) and tetramethylguanidine (~0.13 mL, 0.1 mmol, 0.5 equiv.) were added to the reaction mixture. The solution was sparged and sealed and was electrolyzed for 2–3 hours until the reaction yield plateaued. The electrodes were removed and washed with acetone into the reaction mixture and the solution was concentrated. The residue was purified by silica-gel chromatography with hexanes/ethyl acetate to afford the product. Some products required initial elution with hexanes to remove a yellow oil by-product.

## General Procedure C

Carboxylic acid (0.50 mmol, 1.0 equiv.), tetraethylammonium toluenesulfonate (301.44 mg, 1.0 mmol, 2.0 equiv.), pentafluorophenol (460 mg, 1.50 mmol, 3.0 equiv.), tetramethylguanidine (~94  $\mu$ L, 0.75 mmol, 1 equiv.), and acetonitrile (10 mL, 0.05 M in carboxylic acid) were added to a 20-mL vial equipped with a magnetic stir bar and sealed with a septum cap. The resulting mixture was thoroughly shaken and sparged with nitrogen for 10 minutes. The degassed mixture was electrolyzed (see “Section III. Electrochemistry Setup”) at 3.0 V for 3–4 hours. The electrodes were removed and washed with acetone into the reaction mixture and the solution was concentrated. The residue was purified by silica-gel chromatography with hexanes/ethyl acetate to afford the product. Some products required initial elution with hexanes to remove a yellow oil by-product.

## General Procedure C (Scale-up)

Carboxylic acid (2.00 mmol, 1.0 equiv.), tetraethylammonium toluenesulfonate (1.21 g, 4.00 mmol, 2.0 equiv.), pentafluorophenol (1.84 g, 10.00 mmol, 5.0 equiv.), tetramethylguanidine (~0.37 mL, 3 mmol, 1.5 equiv.), and acetonitrile (40 mL, 0.05 M in carboxylic acid) were added to a 55-mL test tube equipped with a magnetic stir bar and sealed with a 24/40 septum. The resulting mixture was thoroughly shaken and sparged with nitrogen for 10 minutes. The degassed mixture was electrolyzed (see “Section III. Electrochemistry Setup”) at 3.0 V for 6–8 hours. The electrodes were removed and washed with acetone into the reaction mixture and the solution was concentrated. The residue was purified by silica-gel chromatography with hexanes/ethyl acetate to afford the product. Some products required initial elution with hexanes to remove a yellow oil by-product.

## General Procedure (A, B or C) – Product Characterization as *N*-Benzylamide

*For PFP esters that proved inseparable from any byproduct(s) by silica-gel chromatography*

Electrosyntheses were performed the same manner as above. The residue was purified by silica-gel chromatography with hexanes/ethyl acetate to afford the partially purified product. This residue was then dissolved in acetonitrile (5 mL), and benzylamine (~1.50 equiv.) and triethylamine (~1 equiv.) were added to the solution. The reaction was stirred for 6 hours and concentrated. The

residue was dissolved in ethyl acetate (10 mL) and washed with 1 M HCl (2 × 10 mL), saturated Na<sub>2</sub>CO<sub>3</sub> solution (10 mL), and distilled water (10 mL). The organic layer was then dried over sodium sulfate and concentrated to a green-white residue. The residue was purified by silica-gel chromatography with hexanes/ethyl acetate to afford the *N*-benzylamide derivative.

### III. Electrochemistry Setup

#### Electrochemical Setup for Small-Scale Reactions

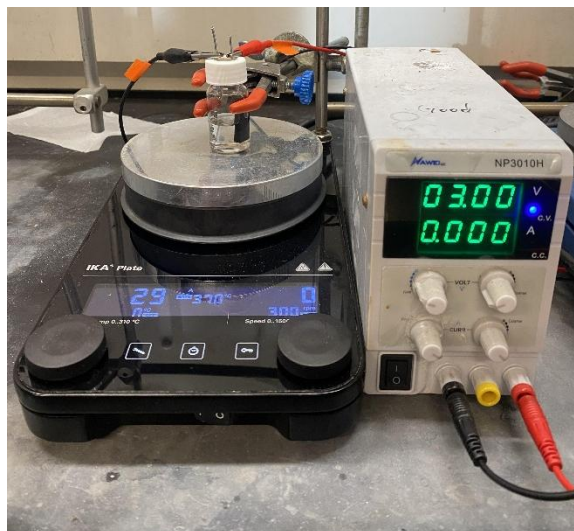

**Figure S1.** Photograph of the in-house electrolytic cell used for the reactions (0.5 mmol scale).

An electrochemical reaction was conducted using a SKY TOPPOWER (PS3010H) DC power source supply. 6-cm piece of OOK 14-gauge galvanized steel wire were bent at one end to form a hook. For the carbon felt electrodes, a 0.5 cm wide, 1.2 cm long, and 3.3 cm high piece of carbon felt was attached to the end of the wire. The hook was crimped with pliers to secure the carbon felt. For the stainless-steel electrodes, a 20 cm piece of 100 lb. braided OOK hanging wire was unbraided. The single strand of wire was wrapped around the galvanized steel wire to create a spring-like structure, and the hook of the galvanized wire was crimped to secure the electrode. This flat stainless-steel wire was then coiled using another piece of galvanized steel wire. Both electrodes were then pierced through a septum cap that would fit onto a 20 mL vial. The vial was charged with a stir bar and the septum cap bearing the electrodes was screwed on. The DC power supply was set to the appropriate potential and then connected to the vial using alligator clips.

## Electrochemical Setup for Large-Scale Reactions

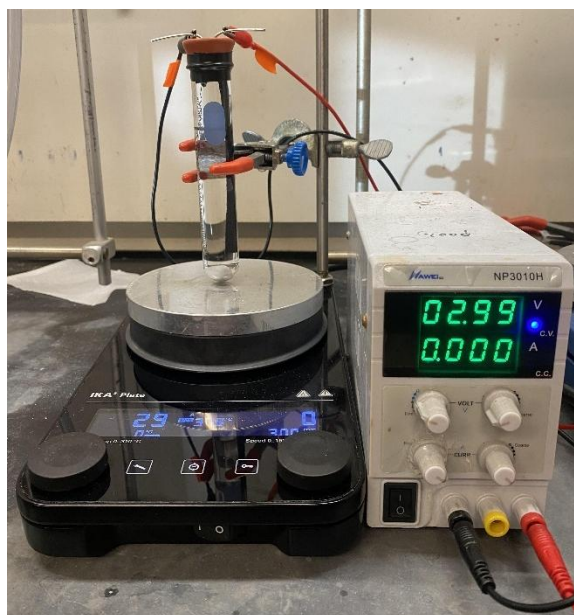

**Figure S2.** Photograph of the in-house electrolytic cell used for the large-scale reactions (2 mmol scale).

An electrochemical reaction was conducted using a SKY TOPPOWER (PS3010H) DC power source supply. A 7.5-cm piece of OOK 14-gauge galvanized steel wire were bent at one end to form a hook. For the carbon felt electrodes, a 0.5 cm wide, 0.5 cm long, and 11 cm high piece of carbon felt was attached to the end of the wire. The hook was crimped with pliers to secure the carbon felt. For the stainless-steel electrodes, a 31 cm piece of 100 lb. braided OOK hanging wire was unbraided. An individual piece of the wire was wrapped around the galvanized steel wire to create a spring-like structure, and the hook of the galvanized wire was crimped to secure the electrode. This flat stainless-steel wire was then coiled using another piece of galvanized steel wire. Both electrodes were then inserted into a septum stopper for a 24/40 outer joint, which can be fitted into a 15 cm diameter by 25 cm height test tube. The tube was charged with a stir bar and the septum stopper bearing the electrodes was screwed on. Electrical tape was wrapped around the cap to prevent it from popping out during the reaction. The DC power supply was set to the appropriate potential and then connected to the tube using alligator clips.

## IV. Optimization

**Table S1.** Impact of solvents on model esterification. Yields determined by  $^{19}\text{F}$  NMR.

(+)  $\text{C}_{\text{felt}}$  | (-) stainless steel  
 4.20 V  
 TMG (1 equiv.),  $\text{Et}_4\text{NOTs}$  (2 equiv.)  
**solvent** (0.05 M), rt

carboxylic acid (0.05 mmol, 1 equiv.) + PFP-OH (3 equiv.) → PFP ester

| entry | solvent | Time (h) | yield (%) |
|-------|---------|----------|-----------|
| 1     | MeCN    | 1        | 80        |
| 2     | MeOH    | 1        | Trace     |
| 3     | DMF     | 3        | 67        |
| 4     | DMSO    | 3        | 38        |

**Table S2.** Impact of cosolvents on model esterification. Yields determined by  $^{19}\text{F}$  NMR.

(+)  $\text{C}_{\text{felt}}$  | (-) stainless steel  
 4.20 V  
 TMG (1 equiv.),  $\text{Et}_4\text{NOTs}$  (2 equiv.)  
 MeCN (0.05 M), **cosolvent** (0.2 mL), rt

carboxylic acid (0.05 mmol, 1 equiv.) + PFP-OH (3 equiv.) → PFP ester

| entry | solvent        | Time (h) | yield (%) |
|-------|----------------|----------|-----------|
| 1     | HFIP           | 1        | 46        |
| 2     | TFE            | 1        | 60        |
| 3     | MeOH           | 1        | 54        |
| 4     | <i>i</i> -PrOH | 1        | 66        |
| 5     | none           | 1        | 82        |

**Table S3.** Impact of water on model esterification. Yields determined by  $^{19}\text{F}$  NMR.

| <div style="display: flex; align-items: center; justify-content: space-around;"> <div style="text-align: center;"> 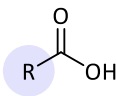 <p>carboxylic acid<br/>(0.05 mmol, 1 equiv.)</p> </div> <div>+</div> <div style="text-align: center;">  <p>PFP-OH<br/>(3 equiv.)</p> </div> <div style="text-align: center;"> <p>(+) <math>\text{C}_{\text{felt}}</math>   (-) stainless steel<br/>4.20 V</p>  <p>TMG (1 equiv.), <math>\text{Et}_4\text{NOTs}</math> (2 equiv.)<br/>MeCN (0.05 M), <b>water (x equiv.)</b>, rt</p> </div> <div style="text-align: center;">  <p>PFP ester</p> </div> </div> |                                     |          |           |
|------------------------------------------------------------------------------------------------------------------------------------------------------------------------------------------------------------------------------------------------------------------------------------------------------------------------------------------------------------------------------------------------------------------------------------------------------------------------------------------------------------------------------------------------------------------------------------------------------------------------------------------------------------------------------------------------------------------------------------------------------------------------------------------------------------------------------------------------------------------------------------------------------------------------|-------------------------------------|----------|-----------|
| entry                                                                                                                                                                                                                                                                                                                                                                                                                                                                                                                                                                                                                                                                                                                                                                                                                                                                                                                  | Equivalents of $\text{H}_2\text{O}$ | Time (h) | yield (%) |
| 1                                                                                                                                                                                                                                                                                                                                                                                                                                                                                                                                                                                                                                                                                                                                                                                                                                                                                                                      | none                                | 1        | 82        |
| 2                                                                                                                                                                                                                                                                                                                                                                                                                                                                                                                                                                                                                                                                                                                                                                                                                                                                                                                      | 2 equiv.                            | 1        | 82        |
| 3                                                                                                                                                                                                                                                                                                                                                                                                                                                                                                                                                                                                                                                                                                                                                                                                                                                                                                                      | 8 equiv.                            | 1        | 76        |
| 4                                                                                                                                                                                                                                                                                                                                                                                                                                                                                                                                                                                                                                                                                                                                                                                                                                                                                                                      | 10 equiv.                           | 1        | 63        |
| 5                                                                                                                                                                                                                                                                                                                                                                                                                                                                                                                                                                                                                                                                                                                                                                                                                                                                                                                      | cosolvent (2.5 mL)                  | 1        | 39        |

**Table S4.** Impact of reaction potential on model esterification. Yields determined by  $^{19}\text{F}$  NMR.

| <div style="display: flex; align-items: center; justify-content: space-around;"> <div style="text-align: center;"> 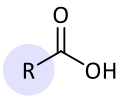 <p>carboxylic acid<br/>(0.05 mmol, 1 equiv.)</p> </div> <div>+</div> <div style="text-align: center;">  <p>PFP-OH<br/>(3 equiv.)</p> </div> <div style="text-align: center;"> <p>(+) <math>\text{C}_{\text{felt}}</math>   (-) stainless steel<br/><b>potential</b></p>  <p>TMG (1 equiv.), <math>\text{Et}_4\text{NOTs}</math> (2 equiv.)<br/>MeCN (0.05 M), rt</p> </div> <div style="text-align: center;">  <p>PFP ester</p> </div> </div> |           |          |           |
|-----------------------------------------------------------------------------------------------------------------------------------------------------------------------------------------------------------------------------------------------------------------------------------------------------------------------------------------------------------------------------------------------------------------------------------------------------------------------------------------------------------------------------------------------------------------------------------------------------------------------------------------------------------------------------------------------------------------------------------------------------------------------------------------------------------------------------------------------------------------------------------------------------------------|-----------|----------|-----------|
| entry                                                                                                                                                                                                                                                                                                                                                                                                                                                                                                                                                                                                                                                                                                                                                                                                                                                                                                           | Potential | Time (h) | yield (%) |
| 1                                                                                                                                                                                                                                                                                                                                                                                                                                                                                                                                                                                                                                                                                                                                                                                                                                                                                                               | 4.0 V     | 1.0      | 82        |
| 2                                                                                                                                                                                                                                                                                                                                                                                                                                                                                                                                                                                                                                                                                                                                                                                                                                                                                                               | 3.5 V     | 1.5      | 83        |
| 3                                                                                                                                                                                                                                                                                                                                                                                                                                                                                                                                                                                                                                                                                                                                                                                                                                                                                                               | 3.0 V     | 2.0      | 85        |
| 4                                                                                                                                                                                                                                                                                                                                                                                                                                                                                                                                                                                                                                                                                                                                                                                                                                                                                                               | 2.5 V     | 6.5      | 68        |

**Table S5.** Impact of PFPOH stoichiometry on model esterification. Yields determined by  $^{19}\text{F}$  NMR.

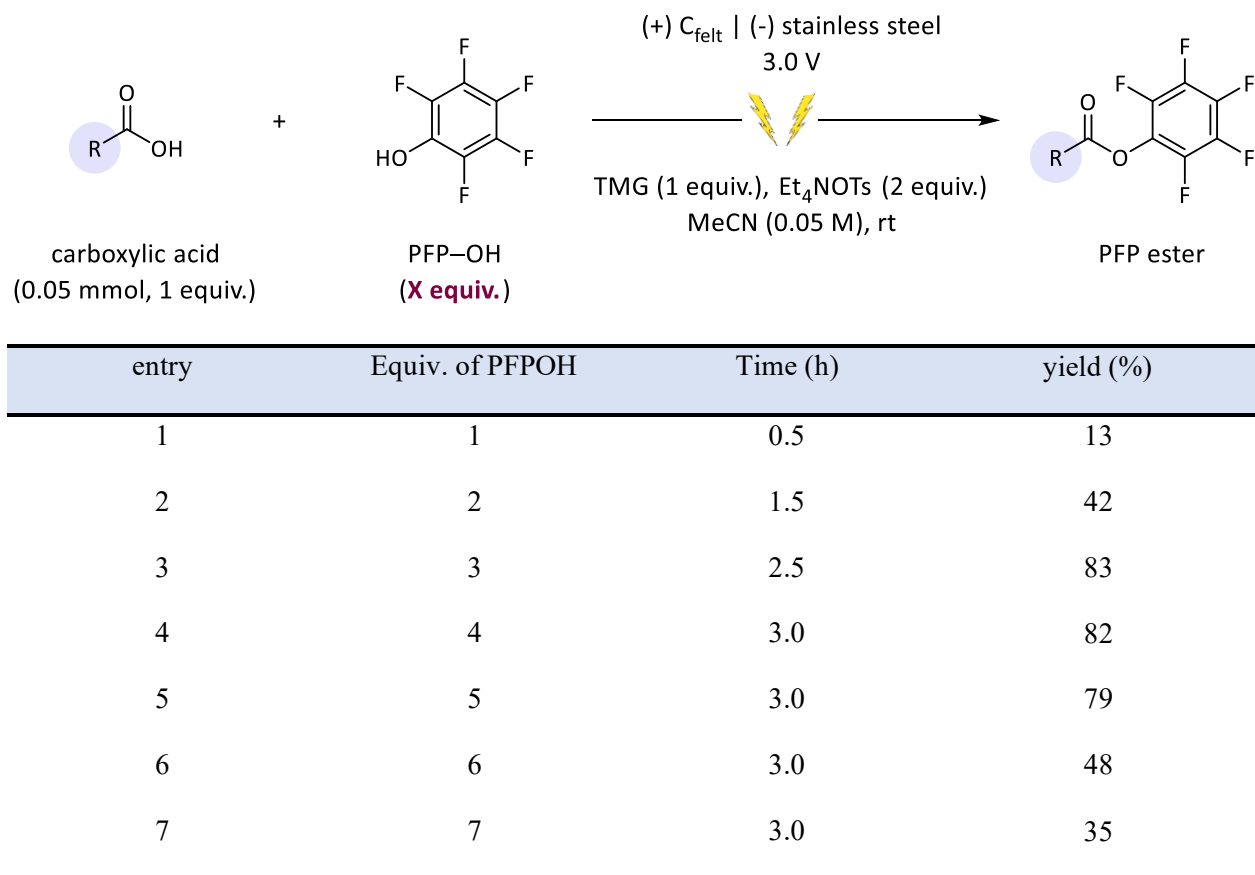



**Table S6.** Impact of base stoichiometry on model esterification. Yields determined by  $^{19}\text{F}$  NMR.

carboxylic acid (0.05 mmol, 1 equiv.) + PFP-OH (5 equiv.)  $\xrightarrow[\text{TMG (x equiv.), Et}_4\text{NOTs (2 equiv.)}]{\text{MeCN (0.05 M), rt, (+) C}_{\text{felt}} \mid \text{(-) stainless steel, 3.0 V}}$  PFP ester

| entry | Equiv. of base | Time (h) | yield (%) |
|-------|----------------|----------|-----------|
| 1     | 0              | 2.5      | None      |
| 2     | 0.5            | 4.5      | 44        |
| 3     | 1.0            | 3.0      | 79        |
| 4     | 1.5            | 2.5      | 82        |
| 5     | 2.0            | 2.5      | 90        |

**Table S7.** Impact of base identity on model esterification. Yields determined by  $^{19}\text{F}$  NMR.

carboxylic acid (0.05 mmol, 1 equiv.) + PFP-OH (5 equiv.)  $\xrightarrow[\text{base (1.5 equiv.), Et}_4\text{NOTs (2 equiv.)}]{\text{MeCN (0.05 M), rt, (+) C}_{\text{felt}} \mid \text{(-) stainless steel, 3.0 V}}$  PFP ester

| entry | Base (pK <sub>a</sub> in MeCN)       | Time (h) | yield (%) |
|-------|--------------------------------------|----------|-----------|
| 1     | NEt <sub>3</sub> (18.8) <sup>2</sup> | 2.5      | None      |
| 2     | DBU (24.3) <sup>2</sup>              | 4.5      | 44        |
| 3     | DABCO (18.3) <sup>2</sup>            | 3.0      | 79        |
| 4     | Pyridine (12.5) <sup>2</sup>         | 2.5      | 82        |
| 5     | TMG (23.35) <sup>2</sup>             | 2.5      | 90        |

**Table S8.** Impact of concentration on model esterification. Yields determined by  $^{19}\text{F}$  NMR.

| <div style="display: flex; align-items: center; justify-content: space-around;"> <div style="text-align: center;"> 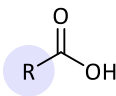 <p>carboxylic acid<br/>(0.05 mmol, 1 equiv.)</p> </div> <div>+</div> <div style="text-align: center;">  <p>PFP-OH<br/>(5 equiv.)</p> </div> <div style="text-align: center;"> <p>(+) <math>\text{C}_{\text{felt}}</math>   (-) stainless steel<br/>3.0 V</p>  <p>TMG (1.5 equiv.), <math>\text{Et}_4\text{NOTs}</math> (2 equiv.)<br/>MeCN (<b>x M</b>), rt</p> </div> <div style="text-align: center;">  <p>PFP ester</p> </div> </div> |               |          |           |
|----------------------------------------------------------------------------------------------------------------------------------------------------------------------------------------------------------------------------------------------------------------------------------------------------------------------------------------------------------------------------------------------------------------------------------------------------------------------------------------------------------------------------------------------------------------------------------------------------------------------------------------------------------------------------------------------------------------------------------------------------------------------------------------------------------------------------------------------------------------------------------------------------|---------------|----------|-----------|
| entry                                                                                                                                                                                                                                                                                                                                                                                                                                                                                                                                                                                                                                                                                                                                                                                                                                                                                              | concentration | Time (h) | yield (%) |
| 1                                                                                                                                                                                                                                                                                                                                                                                                                                                                                                                                                                                                                                                                                                                                                                                                                                                                                                  | 0.025 M       | 2.5      | 88        |
| 2                                                                                                                                                                                                                                                                                                                                                                                                                                                                                                                                                                                                                                                                                                                                                                                                                                                                                                  | 0.05 M        | 2.5      | 88        |
| 3                                                                                                                                                                                                                                                                                                                                                                                                                                                                                                                                                                                                                                                                                                                                                                                                                                                                                                  | 0.075 M       | 4.0      | 78        |
| 4                                                                                                                                                                                                                                                                                                                                                                                                                                                                                                                                                                                                                                                                                                                                                                                                                                                                                                  | 0.10 M        | 4.0      | 73        |
| 5                                                                                                                                                                                                                                                                                                                                                                                                                                                                                                                                                                                                                                                                                                                                                                                                                                                                                                  | 0.25 M        | 8.0      | 55        |

**Table S9.** Impact of electrolyte stoichiometry on model esterification. Yields determined by  $^{19}\text{F}$  NMR.

| <div style="display: flex; align-items: center; justify-content: space-around;"> <div style="text-align: center;"> 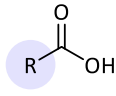 <p>carboxylic acid<br/>(0.05 mmol, 1 equiv.)</p> </div> <div>+</div> <div style="text-align: center;">  <p>PFP-OH<br/>(5 equiv.)</p> </div> <div style="text-align: center;"> <p>(+) <math>\text{C}_{\text{felt}}</math>   (-) stainless steel<br/>3.0 V</p>  <p>TMG (1.5 equiv.), <math>\text{Et}_4\text{NOTs}</math> (<b>x equiv.</b>)<br/>MeCN (0.05 M), rt</p> </div> <div style="text-align: center;">  <p>PFP ester</p> </div> </div> |                                         |          |           |
|---------------------------------------------------------------------------------------------------------------------------------------------------------------------------------------------------------------------------------------------------------------------------------------------------------------------------------------------------------------------------------------------------------------------------------------------------------------------------------------------------------------------------------------------------------------------------------------------------------------------------------------------------------------------------------------------------------------------------------------------------------------------------------------------------------------------------------------------------------------------------------------------------------------|-----------------------------------------|----------|-----------|
| entry                                                                                                                                                                                                                                                                                                                                                                                                                                                                                                                                                                                                                                                                                                                                                                                                                                                                                                         | Equivalents of $\text{Et}_4\text{NOTs}$ | Time (h) | yield (%) |
| 1                                                                                                                                                                                                                                                                                                                                                                                                                                                                                                                                                                                                                                                                                                                                                                                                                                                                                                             | 0                                       | 6.0      | 0         |
| 2                                                                                                                                                                                                                                                                                                                                                                                                                                                                                                                                                                                                                                                                                                                                                                                                                                                                                                             | 1                                       | 3.0      | 14        |
| 3                                                                                                                                                                                                                                                                                                                                                                                                                                                                                                                                                                                                                                                                                                                                                                                                                                                                                                             | 2                                       | 2.5      | 89        |
| 4                                                                                                                                                                                                                                                                                                                                                                                                                                                                                                                                                                                                                                                                                                                                                                                                                                                                                                             | 3                                       | 2.5      | 85        |

**Table S10.** Impact of electrolyte identity on model esterification. Yields determined by  $^{19}\text{F}$  NMR.

| <div style="display: flex; align-items: center; justify-content: space-around;"> <div style="text-align: center;"> 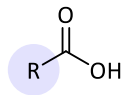 <p>carboxylic acid<br/>(0.05 mmol, 1equiv.)</p> </div> <div>+</div> <div style="text-align: center;">  <p>PFP-OH<br/>(5 equiv.)</p> </div> <div style="text-align: center;"> <p>(+) <math>\text{C}_{\text{felt}}</math>   (-) stainless steel</p> <p>3.0 V</p>  <p>TMG (1.5 equiv.), <b>electrolyte</b> (2 equiv.)<br/>MeCN (0.05 M), rt</p> </div> <div style="text-align: center;">  <p>PFP ester</p> </div> </div> |                                                              |          |           |
|---------------------------------------------------------------------------------------------------------------------------------------------------------------------------------------------------------------------------------------------------------------------------------------------------------------------------------------------------------------------------------------------------------------------------------------------------------------------------------------------------------------------------------------------------------------------------------------------------------------------------------------------------------------------------------------------------------------------------------------------------------------------------------------------------------------------------------------------------------------------------------|--------------------------------------------------------------|----------|-----------|
| entry                                                                                                                                                                                                                                                                                                                                                                                                                                                                                                                                                                                                                                                                                                                                                                                                                                                                           | electrolyte                                                  | Time (h) | yield (%) |
| 1                                                                                                                                                                                                                                                                                                                                                                                                                                                                                                                                                                                                                                                                                                                                                                                                                                                                               | $\text{Bu}_4\text{NBr}$                                      | 2.5      | 75        |
| 2                                                                                                                                                                                                                                                                                                                                                                                                                                                                                                                                                                                                                                                                                                                                                                                                                                                                               | $\text{Bu}_4\text{NCl}$                                      | 2.0      | 75        |
| 3                                                                                                                                                                                                                                                                                                                                                                                                                                                                                                                                                                                                                                                                                                                                                                                                                                                                               | $\text{Et}_4\text{NCl}$                                      | 2.0      | 80        |
| 4                                                                                                                                                                                                                                                                                                                                                                                                                                                                                                                                                                                                                                                                                                                                                                                                                                                                               | $\text{Et}_4\text{NOTs}$                                     | 2.5      | 87        |
| 5                                                                                                                                                                                                                                                                                                                                                                                                                                                                                                                                                                                                                                                                                                                                                                                                                                                                               | $\text{Et}_4\text{NBF}_4$                                    | 2.0      | 68        |
| 6                                                                                                                                                                                                                                                                                                                                                                                                                                                                                                                                                                                                                                                                                                                                                                                                                                                                               | $\text{Et}_4\text{NPF}_6$                                    | 2.0      | 68        |
| 7                                                                                                                                                                                                                                                                                                                                                                                                                                                                                                                                                                                                                                                                                                                                                                                                                                                                               | $\text{LiPF}_6$                                              | 2.5      | 1         |
| 8                                                                                                                                                                                                                                                                                                                                                                                                                                                                                                                                                                                                                                                                                                                                                                                                                                                                               | $\text{NMe}_4\text{OH} \bullet 5\text{H}_2\text{O}$          | 1.5      | 35        |
| 9                                                                                                                                                                                                                                                                                                                                                                                                                                                                                                                                                                                                                                                                                                                                                                                                                                                                               | $\text{NMe}_4\text{OH} \bullet 5\text{H}_2\text{O}$ (no TMG) | 2.5      | 80        |

**Table S11.** Impact of electrode materials on model esterification. Yields determined by  $^{19}\text{F}$  NMR.

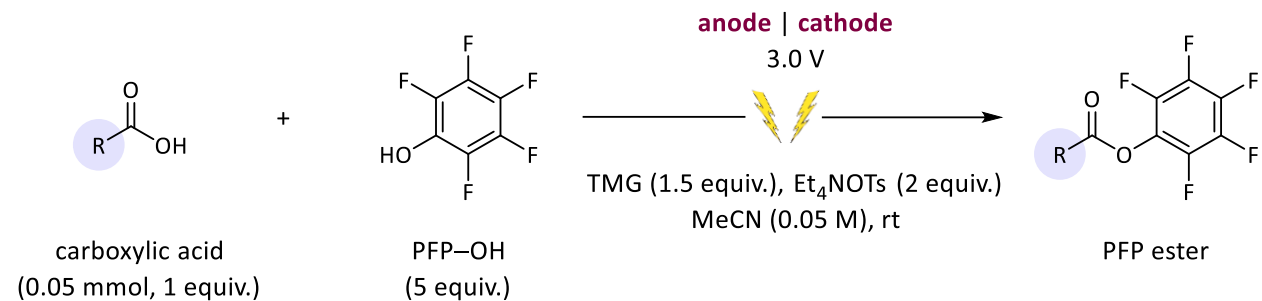

| entry | cathode | anode | Time (h) | yield (%) |
|-------|---------|-------|----------|-----------|
| 1     | C       | SS    | 2.5      | 89        |
| 2     | RVC     | SS    | 3.0      | 81        |
| 3     | C       | SS    | 4.0      | 78        |
| 4     | C       | C     | 2.0      | 53        |
| 5     | C       | Pt    | 2.5      | 88        |
| 6     | C       | Cu    | 2.0      | 76        |
| 7     | C       | Sn    | 2.5      | 73        |
| 8     | C       | Ti    | 3.0      | 77        |
| 9     | C       | Zn    | 3.0      | 76        |

## V. Electrochemical Studies

### Cyclic Voltammetry

#### General Procedure

A solution of analytes(s) (0.003 M) and tetrabutylammonium hexafluorophosphate (0.1 M) in acetonitrile (10 mL) was prepared in a 10-mL three-neck flask (undivided cell) at room temperature. All measurements were scanned oxidatively, from 0 V vs. Ag/AgNO<sub>3</sub> to 2.5 V vs. Ag/AgNO<sub>3</sub>, and then reductively, to 0 V vs. Ag/AgNO<sub>3</sub>, at 500 mV/s. Cyclic voltammograms are shown in Figures S3-S8.

#### Analysis

Figure S3 shows the cyclic voltammogram (oxidative side) of pentafluorophenol (PFPOH) with the electrolyte. Under neutral conditions, pentafluorophenol is oxidized at +1.58 V vs SCE. Upon the addition on 1 equivalent of the base, tetramethylguanidine (TMG), the oxidation of pentafluorophenol becomes more facile, +0.27 V vs. SCE (Figure S4). The use of a different base, tetrabutylammonium hydroxide, resulted in a similar potential, +0.29 V vs. SCE (Figure S5).

3-phenylpropanoic acid has a high oxidation potential under neutral conditions. We did not observe a peak before the limit of oxidation that acetonitrile has (Figure S6).<sup>3</sup> Unsurprisingly, the addition of TMG makes the oxidation of the carboxylic acid possible at +0.96 V (Figure S7). Like with PFPOH, treatment of 3-phenylpropanoic acid with TBAOH, resulted in a near identical potential for oxidation, +0.95 V vs. SCE (Figure S8).

We then took a cyclic voltammogram of a solution that has the equivalencies of acid (1 equiv., 0.003 M), base (1.5 equiv.) and PFPOH (5 equiv.) that is the similar to that of the optimized reaction conditions (Figure S9). We observed a peak at +0.46 V which more closely resembles the oxidation of PFPOH than the oxidation of the acid. We also note that there is no peak close to +0.96 V showing that the acid is most likely. This observation supports our proposed mechanism that the reaction is initiated by the formation of an oxyl radical while the acid is unaffected by the electrolysis. This is also consistent with pKa measurements made that shows that PFPOH is more acidic than aliphatic carboxylic acids.<sup>4</sup>

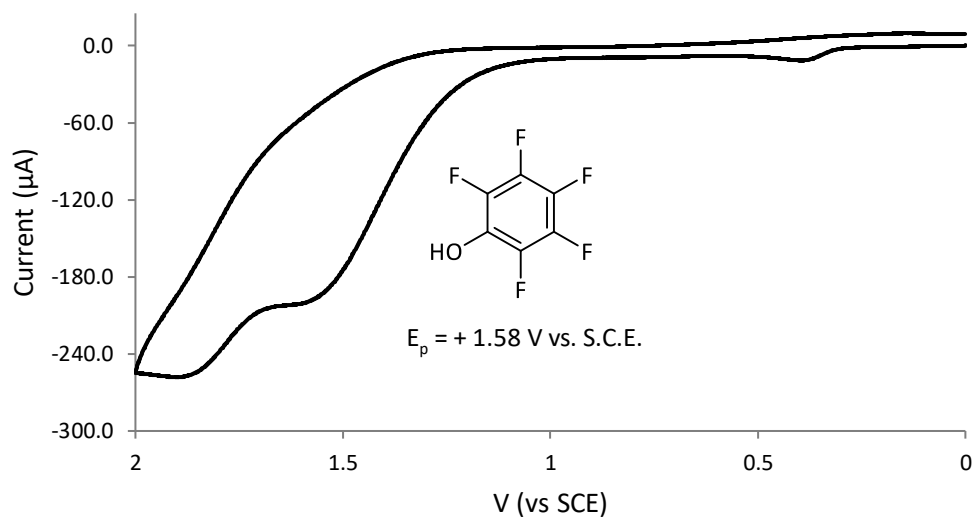

**Figure S3.** Cyclic voltammogram of PFPOH, at 100 mV/s.

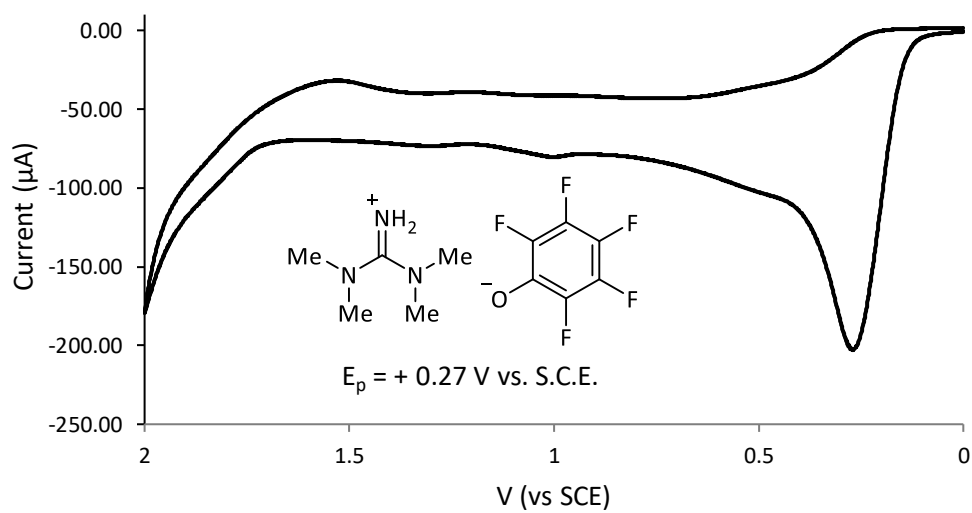

**Figure S4.** Cyclic voltammogram of PFPOH with one equivalent of TMG, at 100 mV/s.

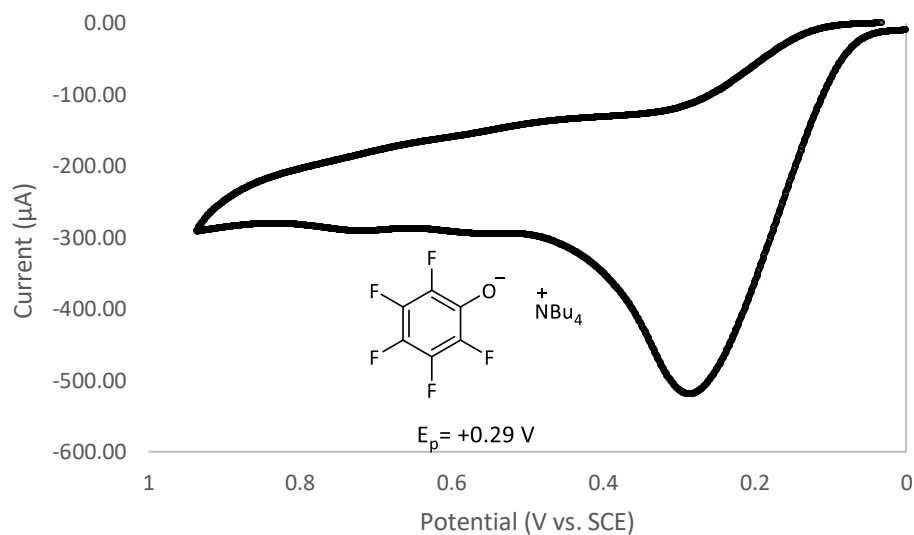

**Figure S5.** Cyclic voltammogram of PFPOH with one equivalent of tetrabutylammonium hydroxide (as an alternative base for deprotonation), at 100 mV/s.

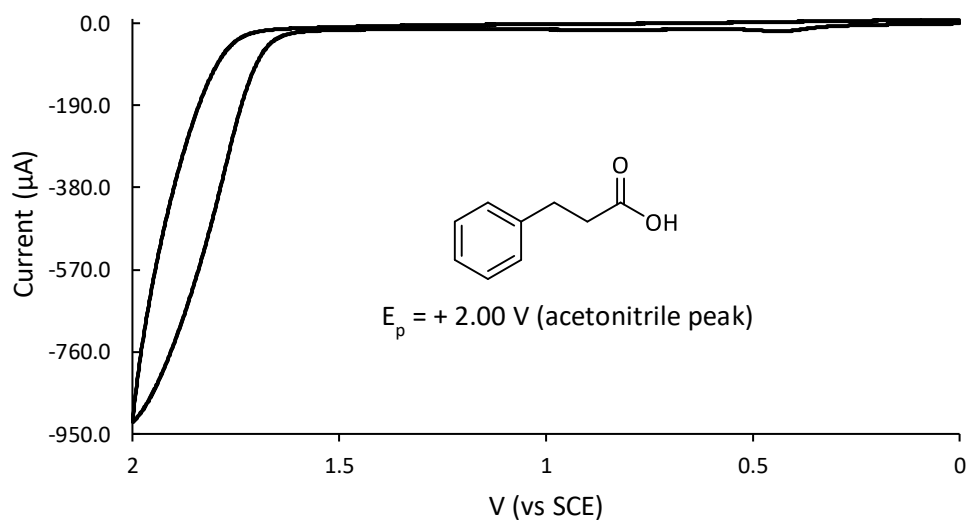

**Figure S6.** Cyclic voltammogram of 3-phenylpropionic acid, at 100 mV/s.

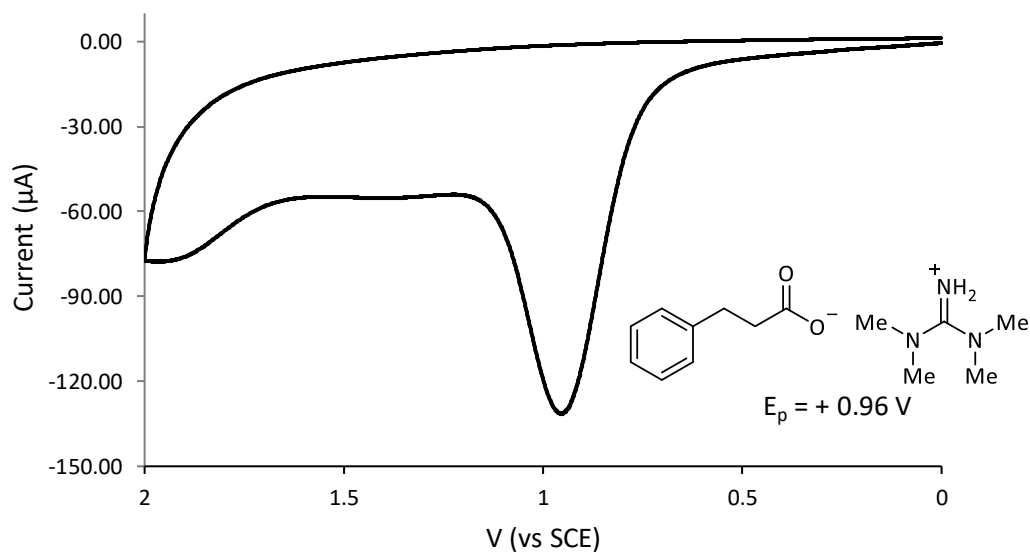

**Figure S7.** Cyclic voltammogram of 3-phenylpropionic acid with one equivalent of TMG, at 100 mV/s.

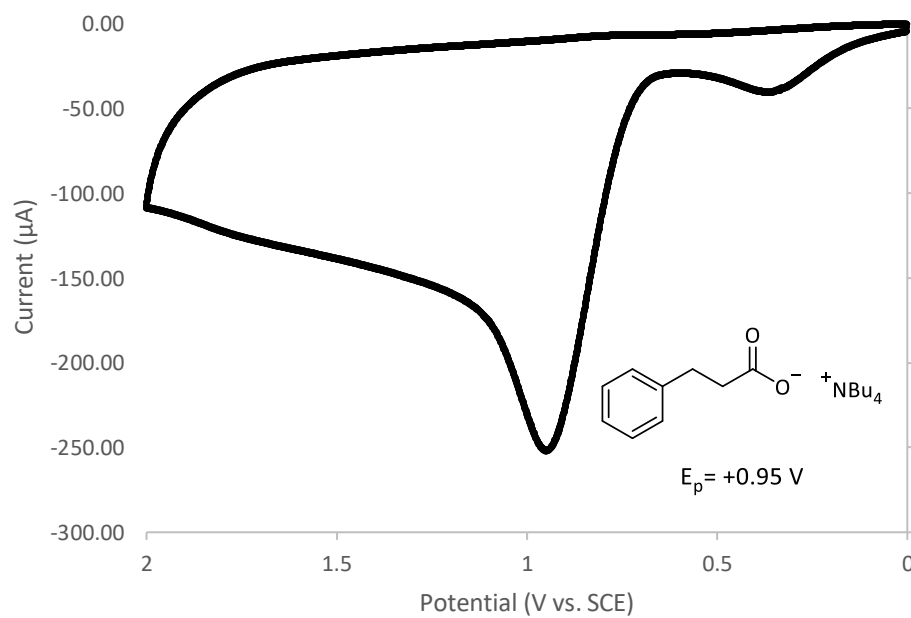

**Figure S8.** Cyclic voltammogram of 3-phenylpropionic acid with one equivalent of TMG, at 100 mV/s.



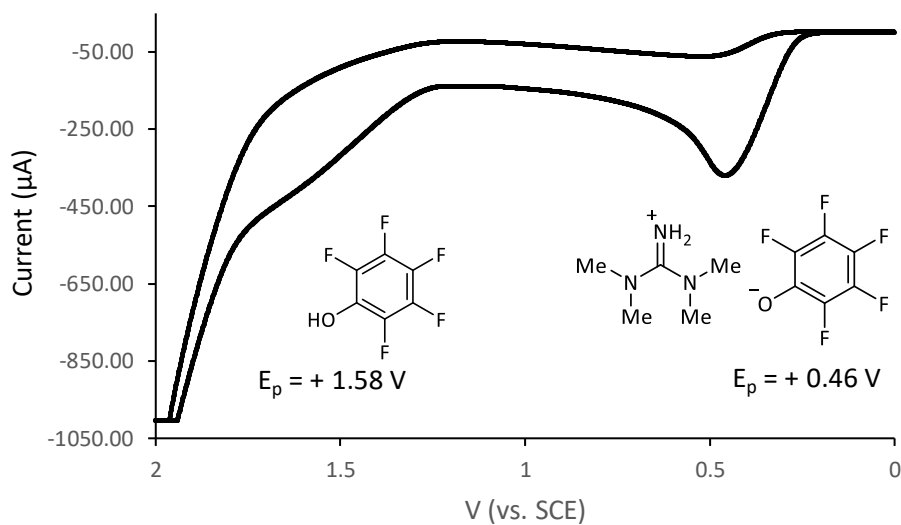

**Figure S9.** Cyclic voltammogram of the model reaction, at 100 mV/s.

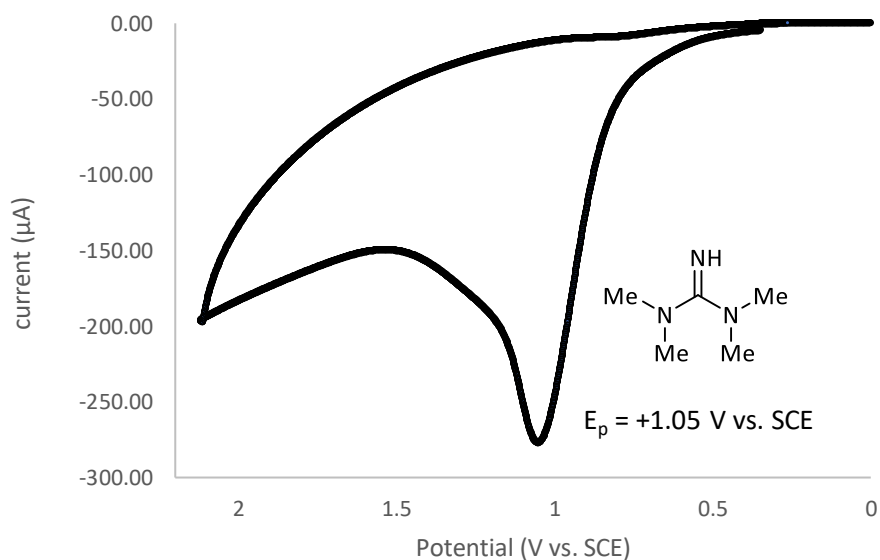

**Figure S10.** Cyclic voltammogram of 1,1,3,3-tetramethylguanidine, at 100 mV/s. We expect TMG to not have an influence on the electrochemistry in the reaction due to the acidity and excess amount of pentafluorophenol which causes TMG to be fully protonated (see S9 for fully protonated CV of TMG).

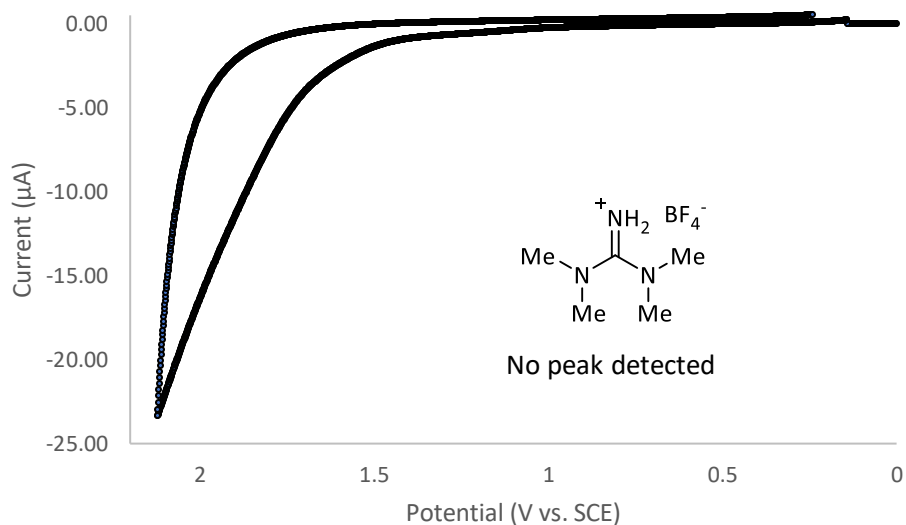

**Figure S11.** Cyclic voltammogram of 1,1,3,3-tetramethylguanidine with one equivalent of  $\text{HBF}_4$  (as a representative of a non-oxidizable strong acid), at 100 mV/s.

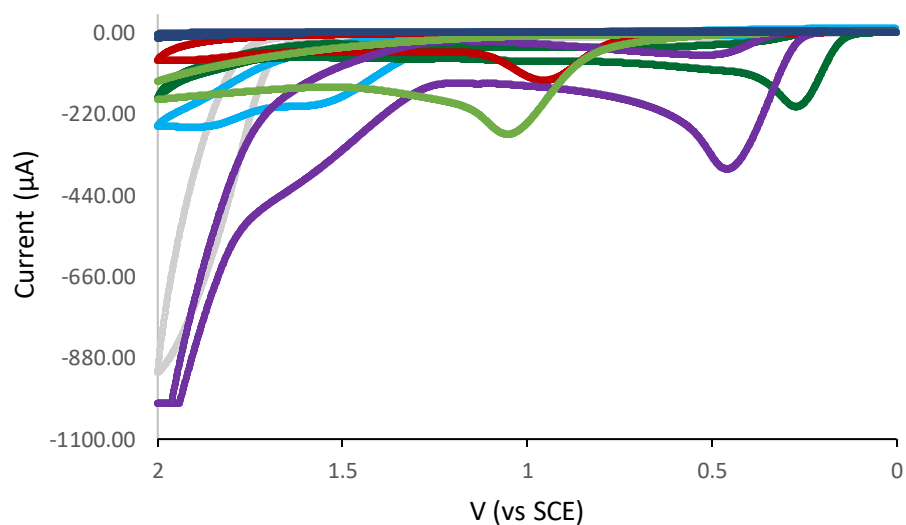

**Figure S12.** An overlay of the five cyclic voltammograms (Figure S3 in blue, Figure S4 in green, Figure S6 in grey, Figure S7 in red, Figure S9 in purple, Figure S10 in lime green and Figure S11 in dark blue [nearly flat line] in). The reaction CV (purple) most resembles the PFPOH with 1 equiv. of TMG (green).

## Measurement of Cathode and Anode Potentials

An electrochemical cell was prepared in the same way as described in Section III. “Electrochemical Setup for Small-Scale Reactions”. In addition, a Ag/AgNO<sub>3</sub> reference electrode (filled with a solution of AgNO<sub>3</sub> (10 mM) and Et<sub>4</sub>NOTs (100 mM) in acetonitrile) was added in between the anode and cathode. A solution composed of 3-phenylpropionic acid (75 mg, 0.5 mmol, 1 equiv.), tetramethylguanidine (94  $\mu$ L, 0.75 mmol, 1.5 equiv.), tetraethylammonium toluenesulfonate (301 mg, 1.00 mmol, 2.0 equiv.), pentafluorophenol (460 mg, 2.5 mmol, 5.0 equiv.) and acetonitrile (20 mL, 0.05 M in 3-phenylpropionic acid) was added to the constructed cell. The power source was connected to the respective electrodes (anode: carbon felt, cathode: stainless steel) and an OWON B35T+ digital multimeter was connected to the reference electrode and the electrode of interest. The multimeter was set to record the potential every 1 minute for 3 hours and the power source was then turned on and set to 3.0 V and the solution was electrolyzed for 3 hours. The recorded potentials are shown in Figures S9-S11.

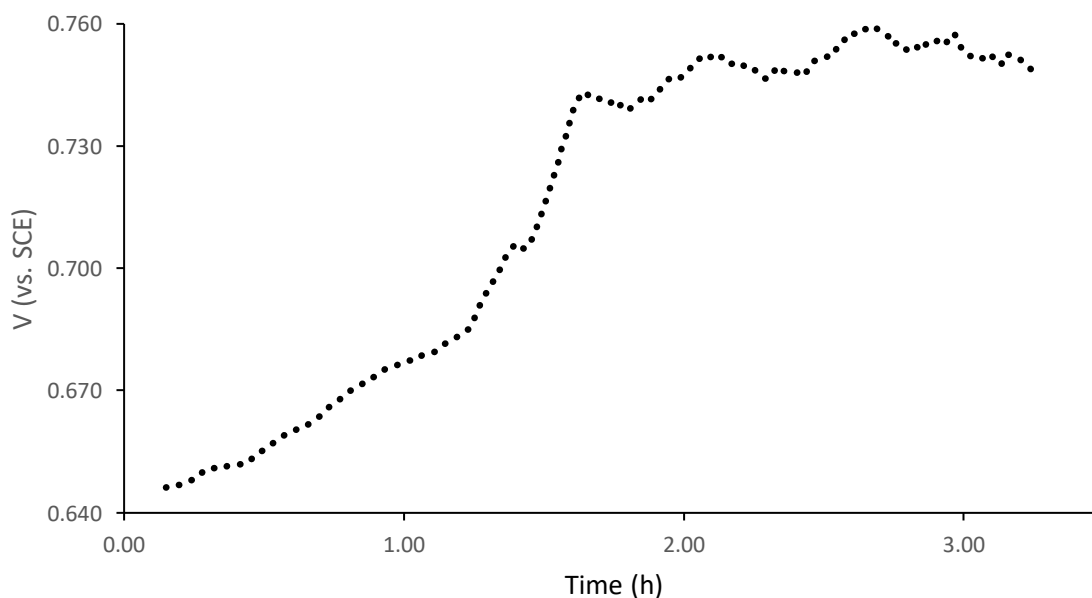

**Figure S13.** Recorded potential of the carbon felt anode vs. SCE. Moving average (period =10).

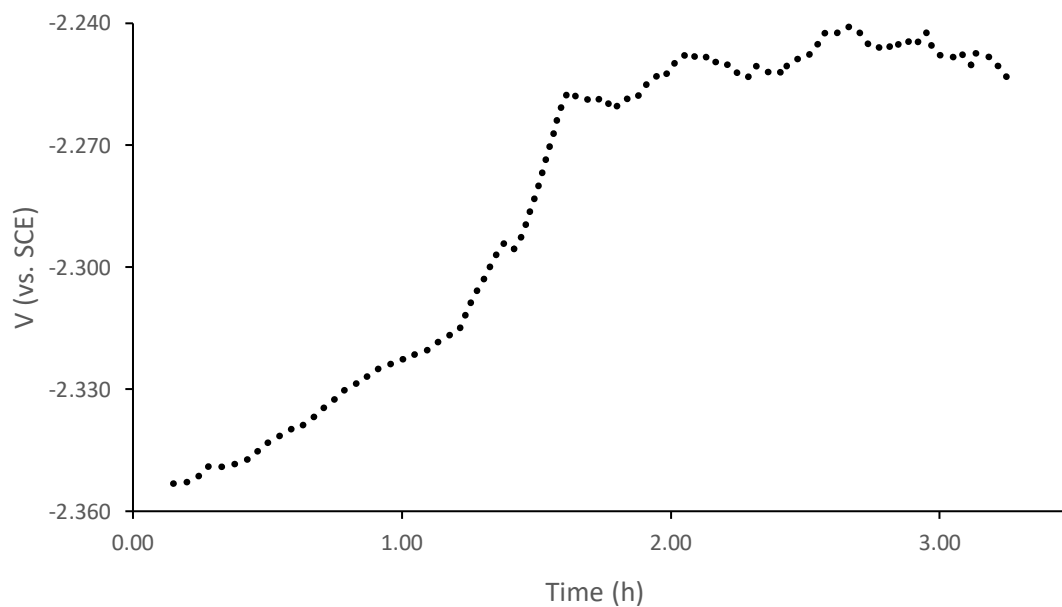

**Figure S14.** Recorded potential of the stainless-steel cathode vs. SCE. Moving average (period =10).

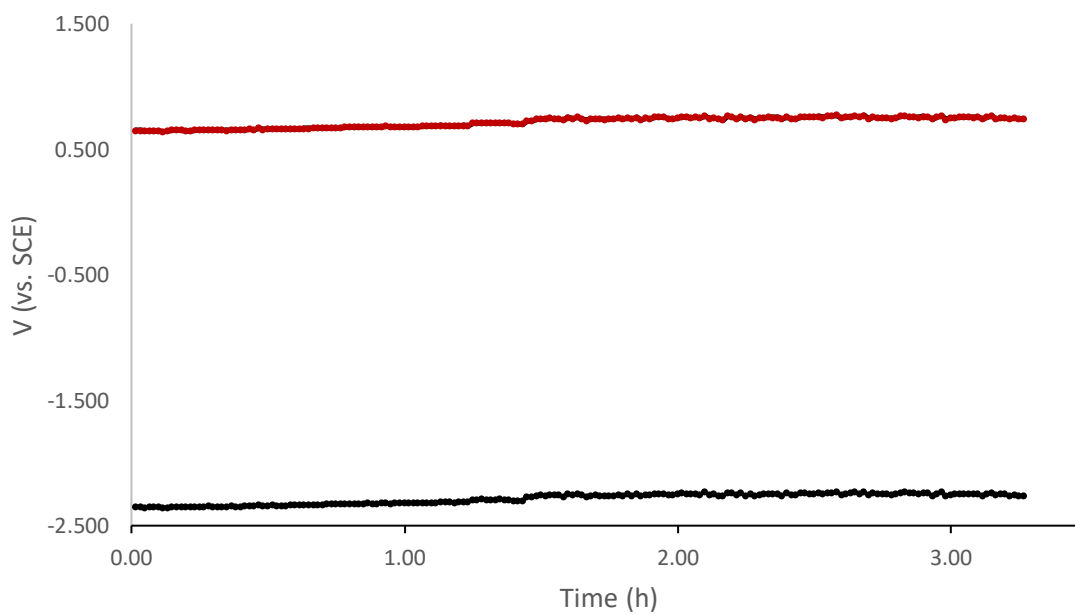

**Figure S15.** Combined potentials of cathode (black) and anode (red).

## VI. Other Mechanistic Studies

### Setup for Measurement of Hydrogen Gas Evolution

An electrochemical cell was prepared in the same way as described in Section III, “Electrochemical Setup for Small-Scale Reactions”. The reaction mixture was composed of 3-phenylpropionic acid (75 mg, 0.50 mmol, 1 equiv.), tetramethylguanidine (94  $\mu$ L, 0.50 mmol, 1.5 equiv.), tetraethylammonium toluenesulfonate (301 mg, 0.50 mmol, 2.0 equiv.), pentafluorophenol (460 mg, 2.50 mmol, 5.0 equiv.) and acetonitrile (10 mL, 0.05 M in 3-phenylpropionic acid). The reaction was electrolyzed incompletely (~30 minutes to 1 hr). After electrolysis, a SKY3000 GAS DETECTOR from SAFEGAS equipped with a needle at the end of the propylene tube was used to detect the amount of H<sub>2</sub> gas in the test tube by sticking the needle in the septa, a smaller gauge needle was also added to function as a vent needle to prevent the pump in the detector from malfunctioning. The calculation and analysis can be found below.

### Calculations and Analysis of Hydrogen Gas Evolution

We initially determined the total volume of the reaction vessel with the septa on in order to approximate the total headspace available. This was done by completely filling the test tube with water and placing the septa equipped with a needle to allow excess water to exit the vessel. We then accounted for the volume of the stir bar which was done by preparing the 10-mL solution indicated above in a graduated cylinder and placing the stir bar to determine the total volume occupied by the solution. We determined the headspace to be 45 mL.

The output of the detector was reported as the lower explosive limit (LEL) which can be converted to parts per million through a factor specific to the gas.<sup>5</sup> For hydrogen 1% LEL = 4% H<sub>2</sub> or 4000 ppm H<sub>2</sub>.

$$[\text{H}_2] = (95 \text{ LEL}) \left( \frac{400 \text{ ppm H}_2}{1 \text{ LEL}} \right) = 38000 \text{ ppm H}_2$$

We then estimated the volume of hydrogen occupying the headspace using the calculated

concentration of H<sub>2</sub>.

$$\text{volume H}_2 = \left( \frac{38000}{1000000} \right) 45 \text{ mL} = 1.71 \text{ mL}$$

This value was then converted into mmol by assuming the molar volume of H<sub>2</sub> approximates to the molar volume of an ideal gas at SATP, 24.5 mL/mmol

$$n \text{ H}_2 = \left( \frac{1.71 \text{ mL}}{24.5 \text{ mL}} \right) \text{mmol} = 0.070 \text{ mmol}$$

We then determined the yield of the reaction at this point by using <sup>19</sup>F NMR, which was 14%.

$$n \text{ product} = 0.14(0.5 \text{ mmol}) = 0.070 \text{ mmol}$$

## Isolation and Structural Determination of Byproduct 62

An electrochemical cell was prepared in the same way as described in Section III, “Electrochemical Setup for Large-Scale Reactions”. The reaction mixture was composed of 3-phenylpropionic acid (300 mg, 2.00 mmol, 1 equiv.), tetramethylguanidine (0.38 mL, 3.00 mmol, 1.5 equiv.), tetraethylammonium toluenesulfonate (1.20 g, 4.00 mmol, 2.0 equiv.), pentafluorophenol (1.84 g, 10.0 mmol, 5.0 equiv.) and acetonitrile (40 mL, 0.05 M in 3-phenylpropionic acid). The reaction was then concentrated, and the byproduct was isolated from a standard reaction mixture using column chromatography with basified silica using triethylamine (TEA) and hexanes/ethyl acetate as the eluent.

## Analysis and Structure Determination

We initially noticed the presence of a byproduct that was being formed at a similar amount (roughly a 1:1 ratio) to the product during the optimization. Initial efforts to isolate this byproduct led to the complete loss of the signals in the  $^{19}\text{F}$  NMR due to an apparent instability in acidic conditions. We then isolated the byproduct in basic conditions in what we postulated would be in its triethylammonium salt form.

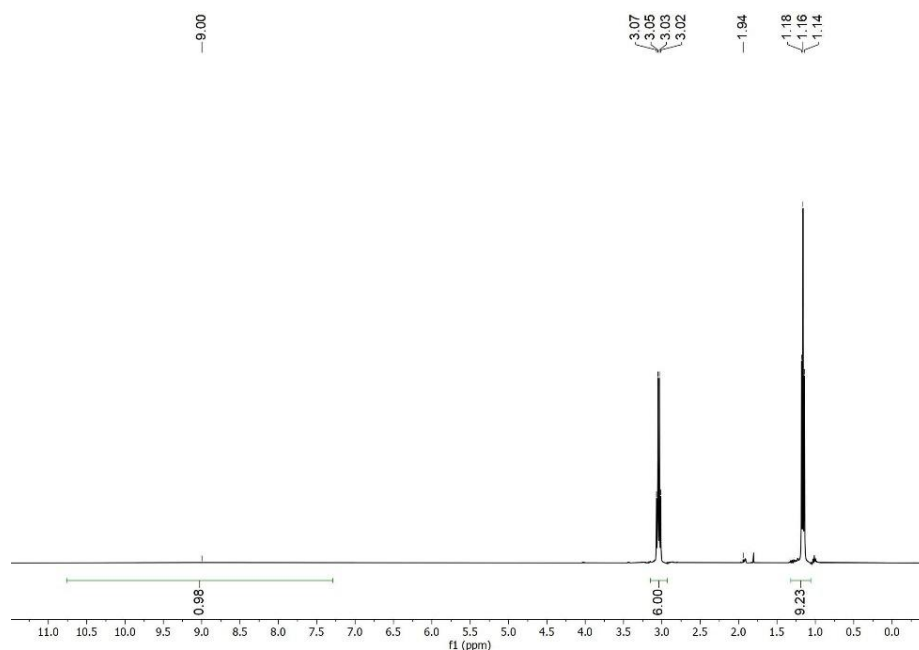

**Figure S16.**  $^1\text{H}$  NMR of the isolated by product.

Using negative-mode direct injection HRMS, we were able to confirm that our isolated compound had an anion that had the formula  $C_{12}F_9O_3$  by obtaining a  $m/z$  of 362.9707 (computed: 362.9709).

The  $^1H$  NMR (Figure S12) of the isolated by product did not show any protons corresponding to the structure of anion, the byproduct of interest. Instead, what we saw a spectrum corresponding to triethylammonium, the cation of the isolated salt. This is consistent with chemical formula found in the HRMS analysis,  $C_{12}F_9O_3$ .

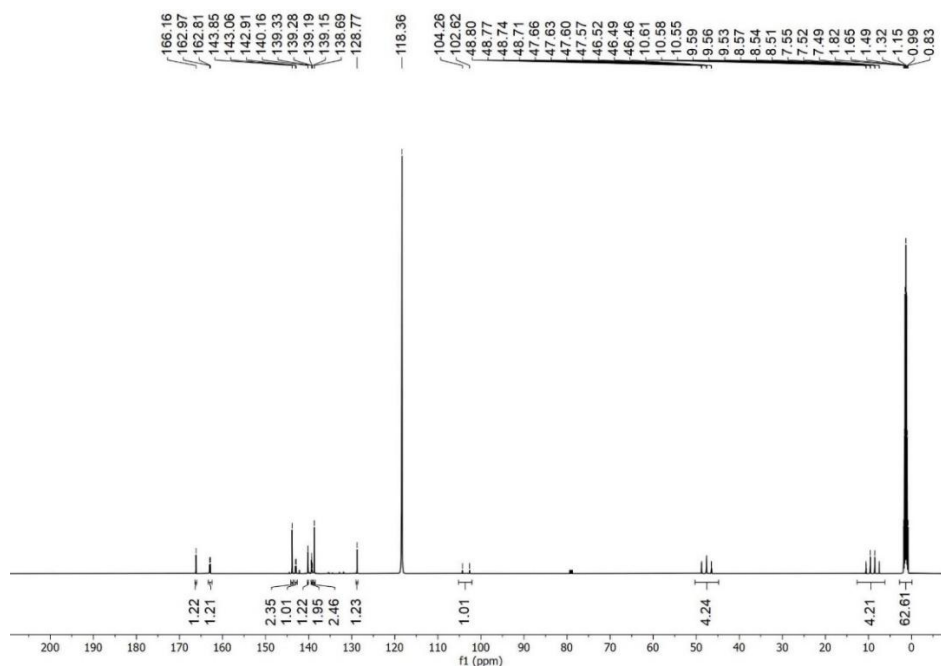

**Figure S17.**  $^{19}F$  decoupled  $^{13}C$  NMR of the isolated by product.

The  $^{13}C$  NMR (Figure S13) of the isolated by product can be divided into two regions: upfield of the acetonitrile solvent peak (at 118.26 ppm) and downfield of the acetonitrile solvent peak (at 118.26 ppm). In order to avoid high multiplicities, we performed  $^{19}F$ -decoupled  $^{13}C$  NMR. Upfield of the solvent peak, the two peaks corresponding to the cation, triethylammonium can be seen. Downfield of the acetonitrile peak, 12 peaks corresponding to each of the carbons of the anion (Figure S14).  $^1H$ -decoupled spectra (not shown) multiplicities were too high for each peak that the spectra was not interpretable.



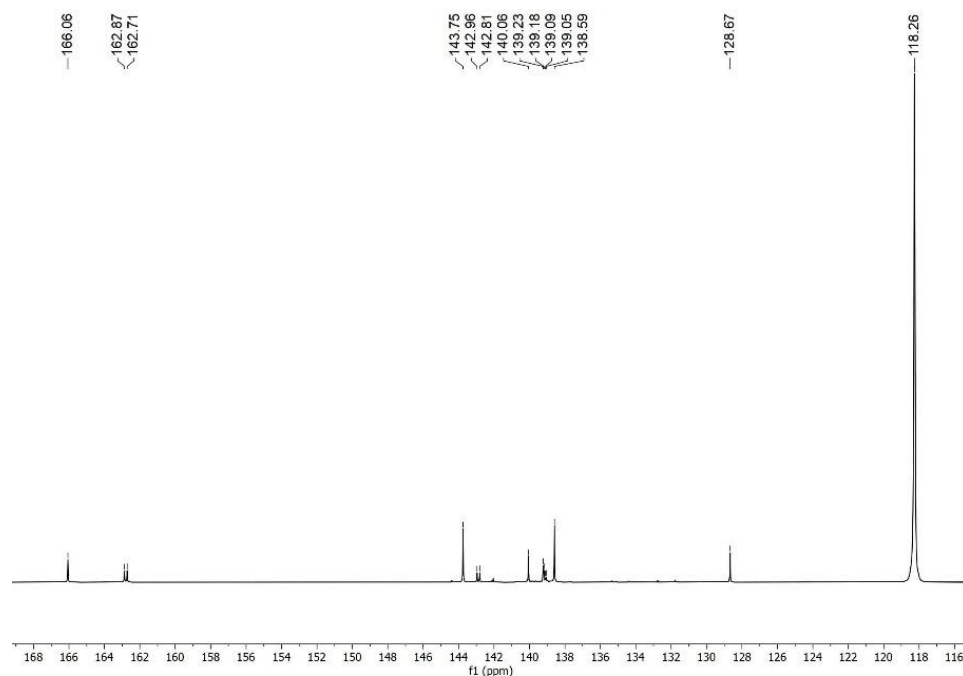

**Figure S18.**  $^{19}\text{F}$  decoupled  $^{13}\text{C}$  NMR of the isolated byproduct (downfield of solvent peak).

$^{19}\text{F}$  NMR (Figure S15) and  $^{19}\text{F}$  COSY (Figure S16) allowed us to propose a structure for the byproduct. Peak B, E, and F were a familiar pattern to us, as it is the common peak pattern for a pentafluorophenyl ring. We hypothesized that the fluorine that corresponds to peak A is most likely attached to the carbon connected to the pentafluorophenol group. Two correlations between A  $\rightarrow$  C, A  $\rightarrow$  D or A  $\rightarrow$  G convinced us that fluorine A was adjacent to two fluorines. A correlation found between C  $\rightarrow$  G and D  $\rightarrow$  G also gave us an indication that fluorine G must be adjacent to one of these fluorines. After building up this rudimentary skeleton, we then completed the structure to fit our chemical formula, due to the lack of hydrogens, we propose quinone-like structures (Figure S17).

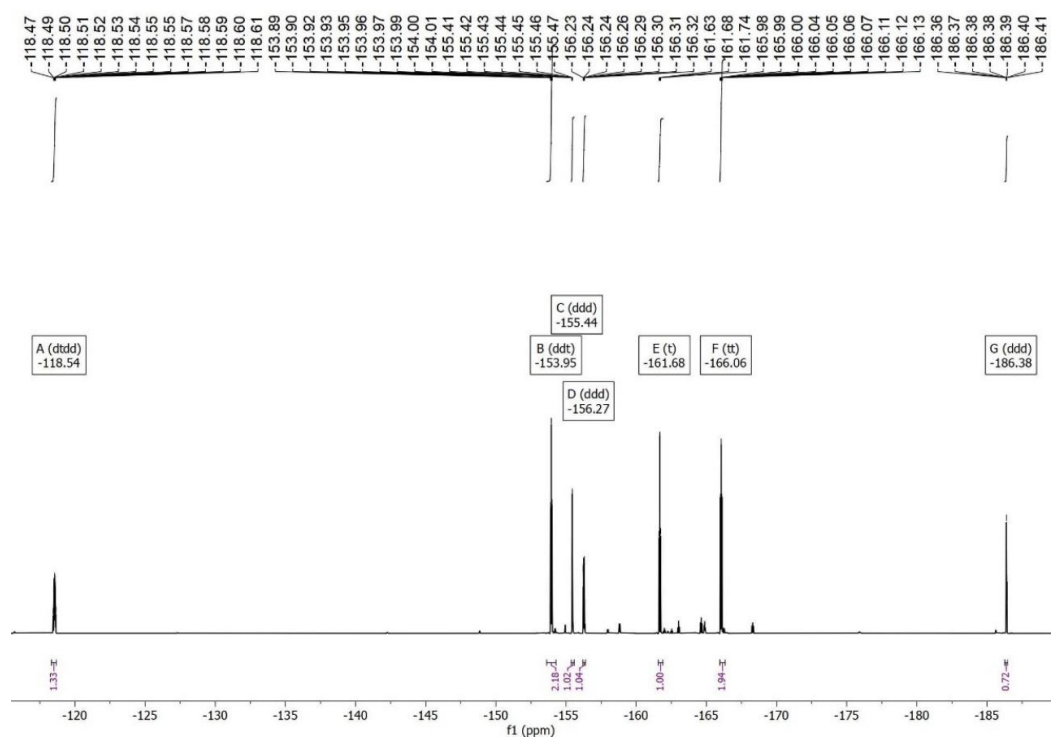

**Figure S19.**  $^{19}\text{F}$  NMR of the isolated product.

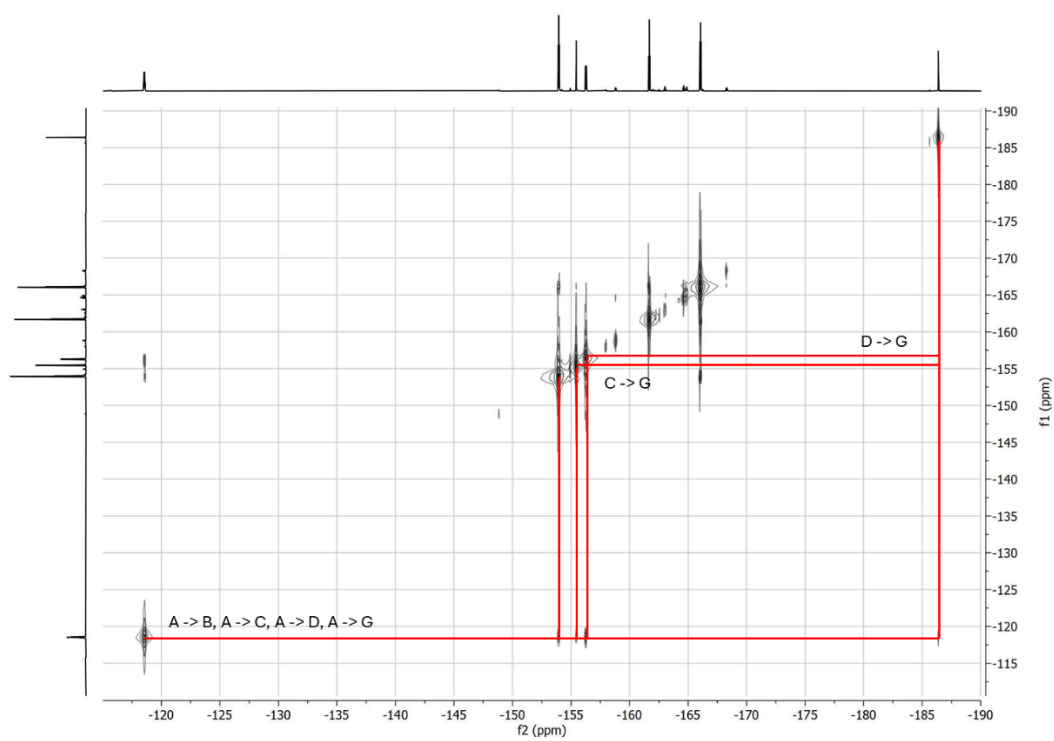

**Figure S20.**  $^{19}\text{F}$  COSY NMR of the isolated product.

Based on the stronger correlation between  $A \rightarrow C$  and  $A \rightarrow D$  (two  $^3J$ ), we believe that **structure I** is the more likely structure. Structure II should have fluorine A have a strong correlation to one fluorine and two weaker ones ( $^4J$  and  $^5J$ ).

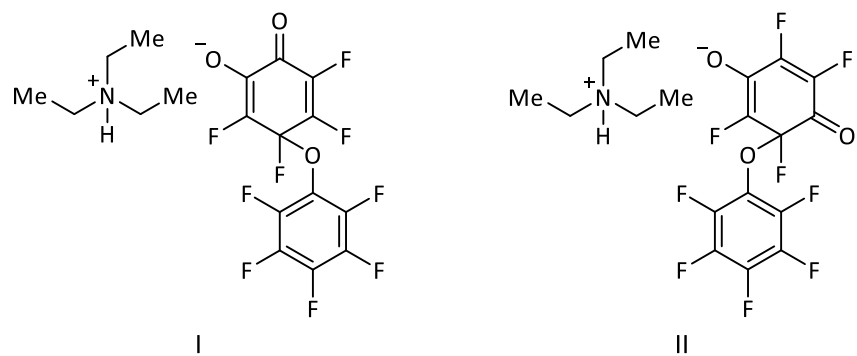

**Figure S21.** Two possible structures of the byproduct. Structure I is favored (see discussion).

### Trapping of the Pentafluorophenoxy Radical.

An electrochemical cell was prepared in the same way as described in Section III, “Electrochemical Setup for Small-Scale Reactions” using an 8-mL vial. The reaction mixture was composed of 3-phenylpropionic acid (38 mg, 0.25 mmol, 1 equiv.), tetramethylguanidine (47  $\mu$ L, 0.25 mmol, 1.5 equiv.), tetraethylammonium toluenesulfonate (150 mg, 0.38 mmol, 2.0 equiv.), pentafluorophenol (230 mg, 1.25 mmol, 5.0 equiv.) and acetonitrile (10 mL, 0.05 M in 3-phenylpropionic acid). 5-diisopropoxy-phosphoryl-5-methyl-1-pyrroline-N-oxide (66 mg, 0.25 mmol, 1 equiv.) was added to the solution and was electrolyzed for 3 hours at 3.00 V. The crude solution was analyzed via  $^{31}\text{P}$  NMR and LC-HRMS.

### Analysis

In order to support our hypothesis, we attempted to trap the pentafluorophenyl radical. We chose to use 5-diisopropoxy-phosphoryl-5-methyl-1-pyrroline-N-oxide (DIPPMPO) as the radical trap because of its ability to trap oxygen-centered radicals.<sup>6</sup> The  $^{31}\text{P}$  NMR shows a signal at 24.28 ppm which is consistent with DIPPMPO trapping a phenoxy radical. The original DIPPMPO signal (22.2 ppm) is shifted downfield to around 24-25 ppm.<sup>6</sup> In order to confirm, the presence of the correct species, we analyzed the sample using negative-mode HRMS and found the mass 446.1144 m/z ( $[\text{M}-\text{H}]^-$ ) which is within acceptable error ( $< 5$  ppm, actual error = 1.3 ppm) to the calculated mass of 446.1150 m/z.

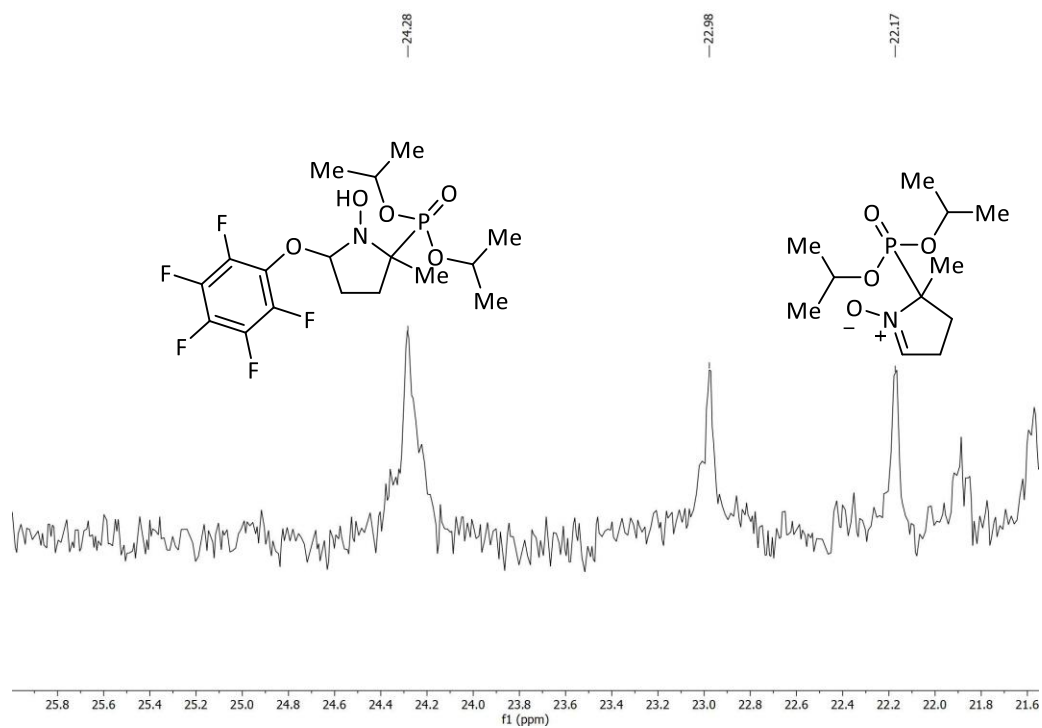

**Figure S22.**  $^{31}\text{P}$  NMR of partially purified sample of model reaction electrolyzed in the presence of the radical trap, DIPPMPO.

## VII. Stability Studies

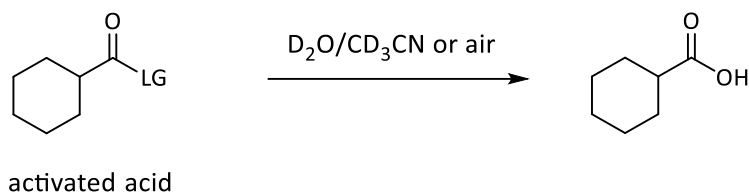

### Air Stability Determination

A 2-dram vial was charged with an activated form of cyclohexane carboxylic acid (100 mg for solids, 1 mL for liquids). A small aliquot of the substance was taken by dipping the pipette into the sample and passing  $\text{CDCl}_3$  through the pipette into an NMR tube. The sample was monitored periodically and the ratio of the alpha hydrogen of the activated acid to the alpha hydrogen of cyclohexane carboxylic acid was used to monitor the progress of hydrolysis. The results can be seen in Tables S12-S15.

### Water Stability Determination

An activated form of cyclohexane carboxylic acid (0.025 mmol) was dissolved in 0.5 mL of a solution composed of  $\text{D}_2\text{O}$  and acetonitrile (1:4 ratio). The solution was monitored periodically and the ratio of the alpha hydrogen of the activated acid to the alpha hydrogen of cyclohexane carboxylic acid was used to monitor the progress of hydrolysis. The results can be seen in Tables S16-S19.

**Table S12.** Decomposition of cyclohexanecarbonyl chloride in air.

| Time (h) | % remaining |
|----------|-------------|
| 0.00     | 100.00      |
| 1.00     | 97.00       |
| 3.00     | 84.00       |
| 5.00     | 79.00       |
| 22.00    | 56.00       |
| 32.00    | 30.00       |
| 48.00    | 23.00       |
| 60.00    | 10.00       |
| 72.00    | 0.00        |

**Table S13.** Decomposition of cyclohexanecarboxylic anhydride in air.

| Time (h) | % remaining |
|----------|-------------|
| 0.00     | 100.00      |
| 48.00    | 75.00       |
| 96.00    | 59.00       |
| 168.00   | 29.00       |
| 240.00   | 10.00       |
| 284.00   | 0.00        |

**Table S14.** Decomposition of pentafluorophenyl cyclohexanecarboxylate in air.

| Time (h) | % remaining |
|----------|-------------|
| 0.00     | 100.00      |
| 160.00   | 100.00      |
| 336.00   | 100.00      |
| 504.00   | 100.00      |
| 1008.00  | 100.00      |
| 3600.00  | 100.00      |

**Table S15.** Decomposition of 2,5-dioxopyrrolidin-1-yl cyclohexanecarboxylate (NHS ester) in air.

| Time (h) | % remaining |
|----------|-------------|
| 0.00     | 100.00      |
| 72.00    | 100.00      |
| 168.00   | 100.00      |

**Table S16.** Decomposition of cyclohexanecarbonyl chloride in 1:4 D<sub>2</sub>O/CD<sub>3</sub>CN.

| Time (h) | % remaining |
|----------|-------------|
| 0.00     | 100.00      |
| 0.13     | 2.00        |
| 0.27     | 0.00        |



**Table S17.** Decomposition of cyclohexanecarboxylic anhydride in 1:4 D<sub>2</sub>O/CD<sub>3</sub>CN.

| Time (h) | % remaining |
|----------|-------------|
| 0.00     | 100.00      |
| 0.25     | 70.00       |
| 5.00     | 68.00       |
| 24.00    | 65.00       |
| 47.00    | 61.00       |
| 72.00    | 57.00       |
| 142.00   | 50.00       |
| 190.00   | 46.00       |
| 214.00   | 43.00       |
| 310.00   | 33.00       |
| 358.00   | 27.00       |
| 381.00   | 21.00       |

**Table S18.** Decomposition of pentafluorophenyl cyclohexanecarboxylate in 1:4 D<sub>2</sub>O/CD<sub>3</sub>CN.

| Time (h) | % remaining |
|----------|-------------|
| 0.00     | 100.00      |
| 0.52     | 100.00      |
| 5.00     | 100.00      |
| 24.00    | 100.00      |
| 47.00    | 100.00      |
| 72.00    | 99.00       |
| 142.00   | 99.00       |

|        |       |
|--------|-------|
| 190.00 | 99.00 |
| 214.00 | 99.00 |
| 310.00 | 99.00 |
| 358.00 | 98.00 |
| 381.00 | 98.00 |

---

**Table S19.** Decomposition of 2,5-dioxopyrrolidin-1-yl cyclohexanecarboxylate (NHS ester) in 1:4 D<sub>2</sub>O/CD<sub>3</sub>CN.

| Time (h) | % remaining |
|----------|-------------|
| 0.00     | 100.00      |
| 0.38     | 100.00      |
| 5.00     | 99.00       |
| 24.00    | 99.00       |
| 48.00    | 98.00       |
| 72.00    | 96.00       |
| 142.00   | 94.00       |
| 190.00   | 93.00       |
| 214.00   | 93.00       |
| 310.00   | 91.00       |
| 358.00   | 90.00       |
| 381.00   | 90.00       |

---

## VIII. Derivatization Procedures

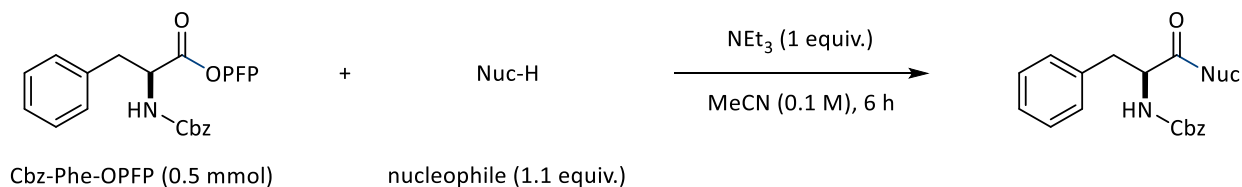

### General Nucleophilic Substitution Procedure

Cbz-Phe-OPFP (233 mg, 0.50 mmol, 1.0 equiv.) was dissolved in acetonitrile (5 mL). Triethylamine (70  $\mu$ L, 0.50 mmol, 1.0 equiv.) and the nucleophile (0.55 mol, 1.1 equiv.) was added to the solution and was stirred for 6 hours. The reaction mixture was concentrated and redissolved in ethyl acetate (10 mL). The solution was then washed with 1 M HCl (10 mL), saturated Na<sub>2</sub>CO<sub>3</sub> (10 mL) and distilled water (10 mL). The organic layer was then dried and concentrated. A resulting solid residue was recrystallized with hexanes/ethyl acetate while an oil was purified via column chromatography using hexanes/ethyl acetate.

### General Peptide Coupling Procedure

Cbz-Phe-OPFP (233 mg, 0.50 mmol, 1.0 equiv.) and the amino acid hydrochloride salt (0.55 mmol, 1.1 equiv.) was suspended in acetonitrile (5 mL). Triethylamine (70  $\mu$ L, 0.50 mmol, 2.1 equiv.) was added to the solution and was stirred for 6 hours. The reaction mixture was concentrated and redissolved in ethyl acetate (10 mL). The solution was then washed with 1 M HCl (10 mL), saturated Na<sub>2</sub>CO<sub>3</sub> (10 mL), and water (10 mL). The organic layer was then dried and concentrated. The resulting solid residue was recrystallized with hexanes/ethyl acetate, more polar dipeptides such as tryptophan containing dipeptides, required the use of isopropyl alcohol/water.

Note: Amino acid-PFP esters that are Fmoc-protected required DMF as a solvent. Acetonitrile did not solubilize the reaction mixture and led to the loss of the Fmoc group and a mixture of products.

### **Mosher Acid Test (e.e. determination for amides and ester derivatives of Cbz-Phe)**

Cbz-Phe-OPFP derivative (0.08 mmol, 1.0 equiv.) and Pd/C (5 mg, 0.05 mmol, 0.6 equiv.) was placed in an evacuated flask equipped with a pierceable septa. The solids were suspended in methanol (2 mL) and a balloon filled with hydrogen gas was used to fill the flask with hydrogen. The solution was stirred for 3 hours. The solution was filtered and concentrated to a yellow oil and was used without further purification.

The oil was dissolved in DCM and (*R*)-3,3,3-Trifluoro-2-methoxy-2-phenylpropanoyl chloride or (*rac*)-3,3,3-trifluoro-2-methoxy-2-phenylpropanoyl (40 mg, 0.16 mmols, 2 equiv.) prepared using a previously adapted method was added.<sup>7</sup> Triethylamine (~11  $\mu$ L, 0.08 mmol, 1 equiv.) was added to the solution was stirred overnight. The resulting reaction mixture was concentrated and was analyzed using <sup>19</sup>F NMR.

### **Direct amine substitution (e.e. determination for chiral amino acid-derived PFP esters and Thioesters of Cbz-Phe-OPFP)**

The amino acid-derived PFP ester (0.08 mmol, 1.0 equiv.), (*R*)-1-phenylethan-1-amine or (*rac*)-1-phenylethan-1-amine (10 mg, 0.08 mmol, 1.0 equiv.) and diisopropylethylamine (10 mg, ~0.08 mmol, 1.0 equiv.) was dissolved in THF (2 mL). The solution was cooled to 0 °C and was stirred overnight. The reaction mixture was then concentrated and redissolved in ethyl acetate (5 mL). The ethyl acetate solution was then washed with 1 M HCl (5 mL), saturated sodium carbonate (5 mL) and water (5 mL) and dried over anhydrous sodium sulfate. The dried organic layer was then concentrated to dryness and was analyzed by <sup>1</sup>H NMR.

## IX. Characterization Data for Substrate Scope Entries

### Pentafluorophenyl benzoate (10a)<sup>8</sup>

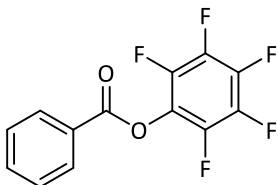

Prepared according to “Section II. General Procedure B”.

**Chromatography solvent 1:** 0-1% ethyl acetate/hexanes

**Physical Characteristics:** white solid

**Yield:** 118 mg (82% yield)

**<sup>1</sup>H NMR (400 MHz, CDCl<sub>3</sub>):** δ 8.22 (d, *J* = 7.7 Hz, 2H), 7.71 (t, *J* = 7.5 Hz, 1H), 7.56 (t, *J* = 7.7 Hz, 2H).

**<sup>13</sup>C NMR (100 MHz, CDCl<sub>3</sub>):** δ 162.75, 141.56 (ddq, *J* = 251.52 Hz, 12.43 Hz, 4.18 Hz), 139.70 (dt, *J* = 253.11 Hz, 13.53 Hz, 3.88 Hz), 138.12 (dm, *J* = 254.51 Hz), 134.83, 130.14, 129.01, 127.10 (tdt, *J* = 14.62 Hz, 4.87 Hz, 1.99 Hz).

**<sup>19</sup>F NMR (376 MHz, CDCl<sub>3</sub>):** δ -151.86 – -153.35 (m, 2F), -158.20 (t, *J* = 21.5 Hz), -162.09 – -162.94 (m).

### Pentafluorophenyl 4-fluorobenzoate (10b)<sup>9</sup>

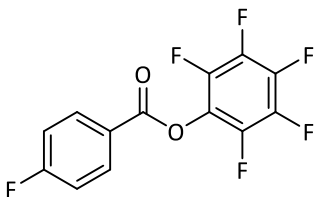

Prepared according to “Section II. General Procedure C”.

**Chromatography solvent 1:** 0-1% ethyl acetate/hexanes

**Physical characteristics:** white solid

**Yield:** 108 mg (71% yield)

**<sup>1</sup>H NMR (400 MHz, CDCl<sub>3</sub>):** δ 8.34 – 8.15 (m, 2H), 7.36 – 7.14 (m, 2H).

**<sup>13</sup>C NMR (100 MHz, CDCl<sub>3</sub>):** δ 168.25, 165.97 (d, *J* = 257.54 Hz), 161.77, 141.53 (ddq, *J* = 251.57 Hz, 12.68 Hz, 3.81 Hz), 139.77 (dt, *J* = 253.70 Hz, 13.72 Hz, 4.00 Hz), 138.12 (dm, *J* = 254.58 Hz), 133.65 (d, *J* = 9.77 Hz), 125.59 – 125.20 (m), 123.36 (d, *J* = 2.63 Hz), 116.42 (d, *J* = 22.35 Hz)

**<sup>19</sup>F NMR (376 MHz, CDCl<sub>3</sub>):** δ -101.88 (s, 1F), -152.47 (d, *J* = 17.2 Hz, 2F), -157.68 (t, *J* = 21.6 Hz, 1F), -161.66 – -162.74 (m, 2F).

**Pentafluorophenyl 4-chlorobenzoate (10c)<sup>9</sup>**

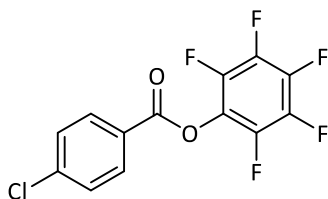

Prepared according to “Section II. General Procedure C”.

**Chromatography solvent 1:** 0-1% ethyl acetate/hexanes

**Physical characteristics:** white solid

**Yield:** 119 mg (74% yield)

**<sup>1</sup>H NMR (400 MHz, CDCl<sub>3</sub>):** δ 8.14 (d, *J* = 8.6 Hz, 2H), 7.54 (d, *J* = 8.6 Hz, 2H).

**<sup>13</sup>C NMR (100 MHz, CDCl<sub>3</sub>):** δ 162.95, 141.67, 141.47 (ddq, *J* = 251.55 Hz, 12.55 Hz, 4.41 Hz), 139.80 (dt, *J* = 254.23 Hz, 13.70 Hz, 4.21 Hz), 138.12 (dm, *J* = 255.00 Hz), 132.20, 129.50, 129.51, 125.50-129.12 (m).

**<sup>19</sup>F NMR (376 MHz, CDCl<sub>3</sub>)** δ -152.28 – -152.64 (m), -157.57 (t, *J* = 21.6 Hz), -162.10 (dd, *J* = 21.7, 17.1 Hz).

**Pentafluorophenyl 4-bromobenzoate (10d)<sup>10</sup>**

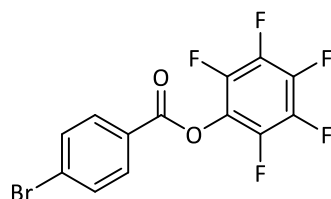

Prepared according to “Section II. General Procedure C”.

**Chromatography solvent 1:** 0-1% ethyl acetate/hexanes

**Physical characteristics:** white solid

**Yield:** 153 mg (83% yield)

**<sup>1</sup>H NMR (400 MHz, CDCl<sub>3</sub>):** δ 8.06 (d, *J* = 8.6 Hz, 2H), 7.70 (d, *J* = 8.6 Hz, 2H).

**<sup>13</sup>C NMR (100 MHz, CDCl<sub>3</sub>):** δ 161.12, 141.45 (ddq, *J* = 251.41 Hz, 12.47 Hz, 4.16 Hz), 139.80 (dt, *J* = 253.93 Hz, 13.63 Hz, 3.96 Hz), 138.10 (dm, *J* = 152.28), 132.50, 132.24, 130.43, 125.96, 125.26 (tdt, *J* = 14.43 Hz, 4.81 Hz, 2.36 Hz).

**<sup>19</sup>F NMR (376 MHz, CDCl<sub>3</sub>)** δ -152.23 – -152.61 (m), -157.53 (t, *J* = 21.7 Hz), -161.81 – -162.24 (m).

**Pentafluorophenyl 4-iodobenzoate (10e)<sup>11</sup>**

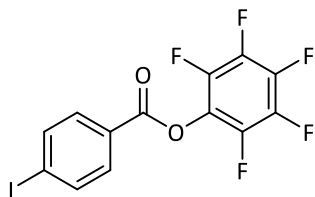

Prepared according to “Section II. General Procedure C”.

**Chromatography solvent 1:** 0-1% ethyl acetate/hexanes

**Physical characteristics:** white solid

**Yield:** 145 mg (70% yield)

**<sup>1</sup>H NMR (400 MHz, CDCl<sub>3</sub>):** δ 7.93 (d, *J* = 8.6 Hz, 2H), 7.89 (d, *J* = 8.7 Hz, 2H).

**<sup>13</sup>C NMR (100 MHz, CDCl<sub>3</sub>):** δ 162.40, 141.44 (ddq, *J* = 251.73 Hz, 12.52 Hz, 4.14 Hz), 141.23 – 138.40 (m), 138.51, 138.10 (dm, *J* = 252.29), 132.02, 126.51, 125.45 – 125.11 (m), 103.30.

**<sup>19</sup>F NMR (376 MHz, CDCl<sub>3</sub>)** δ -152.14 – -152.65 (m), -157.51 (t, *J* = 21.8 Hz), -161.71 – -162.44 (m).

**Pentafluorophenyl 4-(trifluoromethyl)benzoate (10f)<sup>11</sup>**

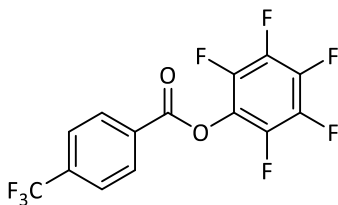

Prepared according to “Section II. General Procedure C”.

**Chromatography solvent:** 0-3% ethyl acetate/hexanes

**Physical characteristics:** white solid

**Yield:** 141 mg (72% yield)

**<sup>1</sup>H NMR (400 MHz, CDCl<sub>3</sub>):** δ 8.34 (d, *J* = 8.2 Hz, 2H), 7.82 (d, *J* = 8.2 Hz, 2H).

**<sup>13</sup>C NMR (100 MHz, CDCl<sub>3</sub>):** δ 161.70, 141.52 (ddq, *J* = 251.93 Hz, 12.56 Hz, 4.09 Hz), 140.02 (dt, *J* = 254.02 Hz, 13.56 Hz, 3.99 Hz), 138.24 (dtdd, *J* = 252.93 Hz, 13.79 Hz, 6.00 Hz, 3.00 Hz), 136.32 (q, *J* = 32.90 Hz), 131.27, 130.45, 126.10 (q, *J* = 3.71 Hz), 125.26 (tdt, *J* = 14.48 Hz, 4.92 Hz, 1.88 Hz), 123.56 (q, *J* = 272.33 Hz)

**<sup>19</sup>F NMR (376 MHz, CDCl<sub>3</sub>)** δ -63.76, -152.71 – -153.01 (m), -157.70 (t, *J* = 21.5 Hz), -162.39 (td, *J* = 22.0, 5.0 Hz).

### Pentafluorophenyl 3-cyanobenzoate (10g)

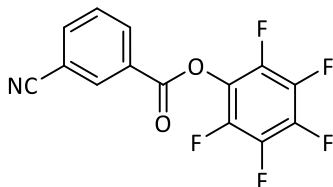

Prepared according to “Section II. General Procedure C”.

**Chromatography solvent:** 5-10% ethyl acetate/hexanes

**Physical characteristics:** white solid

**Yield:** 105 mg (67% yield)

**HRMS:**  $m/z$  calculated for  $C_{14}H_4F_5NO_5$   $[M+H]^+$  336.0054, found 336.0054

**$^1H$  NMR (400 MHz,  $CDCl_3$ ):**  $\delta$  8.50 (s, 1H), 8.46 – 8.35 (m, 1H), 7.99 (dt,  $J$  = 7.8, 1.4 Hz, 1H), 7.72 (t,  $J$  = 7.9 Hz, 1H).

**$^{13}C$  NMR (100 MHz,  $CDCl_3$ ):**  $\delta$  160.95, 140.98 (ddq,  $J$  = 252.36 Hz, 12.68 Hz, 3.99 Hz), 140.01 (dt,  $J$  = 254.20 Hz, 13.74 Hz, 3.79 Hz), 138.13 (dm,  $J$  = 253.06 Hz), 137.73, 136.73, 134.69, 134.32, 130.20, 128.50, 125.12-124.76 (m), 117.42, 113.89.

**$^{19}F$  NMR (376 MHz,  $CDCl_3$ )**  $\delta$  -152.15 – -152.36 (m, 2F), -156.75 (t,  $J$  = 21.6 Hz, 1F), -161.45 – -161.72 (m, 2F).

### Pentafluorophenyl 2-cyanobenzoate (10h)

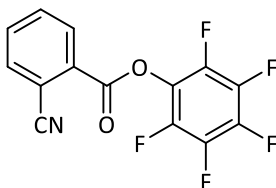

Prepared according to “Section II. General Procedure C”.

**Chromatography solvent:** 5-10% ethyl acetate/hexanes

**Physical characteristics:** white solid

**Yield:** 78 mg (50% yield)

**HRMS:**  $m/z$  calculated for  $C_{14}H_4F_5NO_5$   $[M+H]^+$  336.0054, found 336.0052

**$^1H$  NMR (400 MHz,  $CDCl_3$ ):**  $\delta$  8.43 – 8.29 (m, 1H), 8.01 – 7.89 (m, 1H), 7.89 – 7.75 (m, 2H)

**$^{13}C$  NMR (100 MHz,  $CDCl_3$ ):**  $\delta$  160.23, 141.33 (ddq,  $J$  = 252.34 Hz, 12.46 Hz, 4.08 Hz), 1, 140.03 (dt,  $J$  = 252.51 Hz, 13.67 Hz, 4.13 Hz), 138.09 (dm,  $J$  = 252.64 Hz), 135.54, 134.62, 133.05, 132.35, 128.99, 124.95 - 124.60 (m), 116.67, 114.11.

**$^{19}F$  NMR (376 MHz,  $CDCl_3$ )**  $\delta$  -151.79 – -152.03 (m, 2F), -156.69 (t,  $J$  = 21.7 Hz, 1F), -161.51 – -161.81 (m, 2F).



**Pentafluorophenyl 4-methoxybenzoate (10i)<sup>12</sup>**

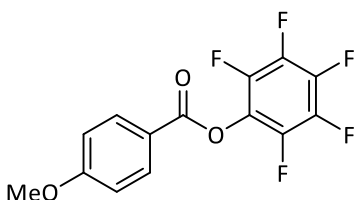

Prepared according to “Section II. General Procedure A”.

**Chromatography solvent 1:** 0-2% ethyl acetate/hexanes

**Physical characteristics:** white solid

**Yield:** 108 mg (61% yield)

**<sup>1</sup>H NMR (400 MHz, CDCl<sub>3</sub>):** δ 8.15 (d, *J* = 8.9 Hz, 2H), 7.01 (d, *J* = 8.9 Hz, 2H), 3.91 (s, 3H).

**<sup>13</sup>C NMR (100 MHz, CDCl<sub>3</sub>):** δ 164.95, 162.40, 141.61 (ddq, *J* = 251.30 Hz, 12.34 Hz, 4.18 Hz), 139.56 (dt, *J* = 252.77 Hz, 13.80 Hz, 3.97 Hz), 138.07 (dm, *J* = 251.93 Hz), 133.14, 125.85-125.47 (m), 119.20, 114.35, 55.77.

**<sup>19</sup>F NMR (376 MHz, CDCl<sub>3</sub>)** δ -152.53 – -152.75 (m), -158.45 (t, *J* = 21.6 Hz), -162.64 (td, *J* = 22.1, 5.2 Hz).

**Pentafluorophenyl 3-methoxybenzoate (10j)<sup>12</sup>**

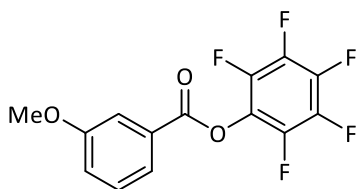

Prepared according to “Section II. General Procedure A”.

**Chromatography solvent 1:** 0-3% ethyl acetate/hexanes

**Physical characteristics:** white solid

**Yield:** 115 mg (72% yield)

**<sup>1</sup>H NMR (400 MHz, CDCl<sub>3</sub>):** δ 8.08 (dd, *J* = 8.1, 1.8 Hz, 1H), 7.70 – 7.56 (m, 1H), 7.09 – 7.05 (m, 2H), 3.96 (s, 3H).

**<sup>13</sup>C NMR (100 MHz, CDCl<sub>3</sub>):** δ 161.21, 160.84, 141.78 (ddq, *J* = 251.43 Hz, 12.39 Hz, 4.30 Hz), 139.48 (dt, *J* = 252.77 Hz, 13.62 Hz, 4.10 Hz), 138.03 (dm, *J* = 251.74 Hz), 125.57 (tdt, *J* = 14.42 Hz, 4.77 Hz, 1.97 Hz), 135.88, 132.96, 120.42, 116.06, 112.42, 56.14.

**<sup>19</sup>F NMR (376 MHz, CDCl<sub>3</sub>)** δ -149.31 – -154.42 (m), -158.45 (t, *J* = 21.7 Hz), -160.31 – -164.85 (m).

**N-benzyl-2-methoxybenzamide (10k – amide)<sup>13</sup>**

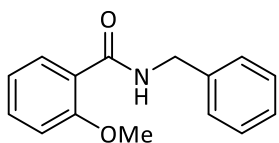

Prepared according to “Section II. General Procedure B - Amidation”.

**Chromatography solvent 1:** 0-3% ethyl acetate/hexanes

**Chromatography solvent 2:** 15-30% ethyl acetate/hexanes

**Physical characteristics:** white solid

**Yield:** 72 mg (60% yield)

**<sup>1</sup>H NMR (400 MHz, CDCl<sub>3</sub>):** δ 8.25 (dd, *J* = 7.8, 1.9 Hz, 1H), 8.18 (s, 1H), 7.44 (ddd, *J* = 8.5, 7.3, 1.9 Hz, 1H), 7.40 – 7.25 (m, 5H), 7.13 – 7.04 (m, 1H), 6.96 (d, *J* = 8.3 Hz, 1H), 4.68 (d, *J* = 5.6 Hz, 2H), 3.91 (s, 3H).

**<sup>13</sup>C NMR (100 MHz, CDCl<sub>3</sub>):** δ 165.32, 157.50, 138.80, 132.82, 132.32, 128.61, 127.47, 127.20, 121.38, 121.26, 111.34, 55.90, 43.70.

**Pentafluorophenyl 2,4,6-trimethoxybenzoate (10l)**

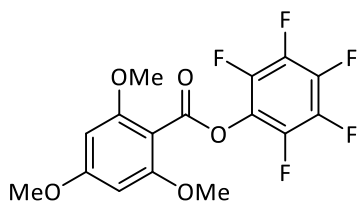

Prepared according to “Section II. General Procedure A”.

**Chromatography solvent 1:** 0-10% ethyl acetate/hexanes

**Physical characteristics:**

**Yield:** 97 mg (51% yield)

**HRMS:** *m/z* calculated for C<sub>16</sub>H<sub>11</sub>F<sub>5</sub>O<sub>5</sub> [M+H]<sup>+</sup> 379.0599, found 379.0599.

**<sup>1</sup>H NMR (400 MHz, CD<sub>3</sub>CN):** δ 6.25 (s, 2H), 3.85-3.84 (m, 9H)

**<sup>13</sup>C NMR (100 MHz, CD<sub>3</sub>CN):** δ 165.42, 162.87, 160.73, 142.41 (ddq, *J* = 249.51 Hz, 12.17 Hz, 4.33 Hz), 140.50 (dtt, *J* = 250.02 Hz, 13.62 Hz, 4.13 Hz), 139.12 (dm, *J* = 249.72 Hz), 126.29 (tdt, *J* = 1.84 Hz, 4.73 Hz, 14.92 Hz) 102.66, 91.92, 56.98, 56.49.

**<sup>19</sup>F NMR (376 MHz, CD<sub>3</sub>CN):** δ -151.42 – -151.82 (m, 2F), -158.90 (t, *J* = 21.6 Hz, F), -162.67 – -163.28 (m, 2F).

**N-benzylpentafluorobenzamide (10m – amide)<sup>14</sup>**

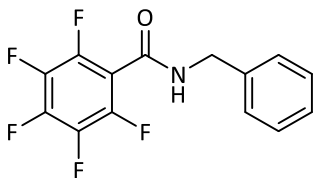

Prepared according to “Section II. General Procedure C”.

**Chromatography solvent 1:** 0-1% ethyl acetate/hexanes

**Chromatography solvent 2:** 10 - 25% ethyl acetate/hexanes

**Physical characteristics:** white solid

**Yield:** 69 mg (46 yield%)

**<sup>1</sup>H NMR (400 MHz, CDCl<sub>3</sub>):**  $\delta$  7.40 – 7.30 (m, 5H), 6.22 (s, 1H), 4.65 (d,  $J$  = 5.7 Hz, 2H).

**<sup>13</sup>C NMR (100 MHz, CDCl<sub>3</sub>):**  $\delta$  157.46, 144.31 (dm,  $J$  = 256.95 Hz), 142.47 (dm,  $J$  = 258.38 Hz), 137.75 (dm,  $J$  = 251.57 Hz), 136.84, 129.06, 128.13, 127.87, 111.74 – 111.28 (m), 44.50.

**<sup>19</sup>F NMR (376 MHz, CDCl<sub>3</sub>)**  $\delta$  -152.15 – -152.36 (m, 2F), -156.75 (t,  $J$  = 21.6 Hz, 1F), -161.45 – -161.72 (m, 2F).

**Pentafluorophenyl 4-azidobenzoate (10n)<sup>15</sup>**

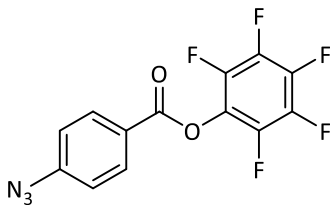

Prepared according to “Section II. General Procedure A”.

**Chromatography solvent 1:** 0-3% ethyl acetate/hexanes

**Physical characteristics:** white solid

**Yield:** 100 mg (61 yield%)

**<sup>1</sup>H NMR (400 MHz, CDCl<sub>3</sub>):**  $\delta$  8.19 (d,  $J$  = 8.7 Hz, 2H), 7.17 (d,  $J$  = 8.7 Hz, 2H).

**<sup>13</sup>C NMR (100 MHz, CDCl<sub>3</sub>):**  $\delta$  161.87, 146.78, 141.51 (ddq,  $J$  = 251.42 Hz, 12.54 Hz, 4.27 Hz), 139.69 (dt,  $J$  = 253.47 Hz, 13.65 Hz, 4.09 Hz), 138.08 (dm,  $J$  = 251.98 Hz), 132.69, 125.41 (tdt,  $J$  = 14.40 Hz, 4.64 Hz, 2.04 Hz), 123.30, 119.38.

**<sup>19</sup>F NMR (376 MHz, CDCl<sub>3</sub>)**  $\delta$  -151.44 – -153.21 (m), -157.78 (t,  $J$  = 21.7 Hz), -161.23 – -163.65 (m).

**Pentafluorophenyl 4-((tert-butoxycarbonyl)amino)benzoate (10o)<sup>16</sup>**

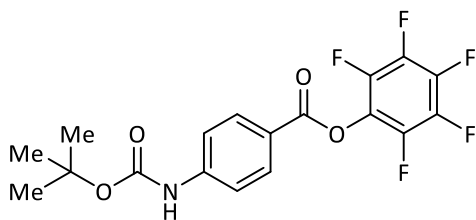

Prepared according to “Section II. General Procedure A”.

**Chromatography solvent:** 2-7% ethyl acetate/hexanes

**Physical characteristics:** white solid

**Yield:** 181 mg (90% yield); 0.645 g (80% yield)

**<sup>1</sup>H NMR (400 MHz, CDCl<sub>3</sub>):** δ 8.13 (d, *J* = 8.8 Hz, 2H), 7.54 (d, *J* = 8.8 Hz, 2H), 6.77 (s, 1H), 1.54 (s, 9H).

**<sup>13</sup>C NMR (100 MHz, CDCl<sub>3</sub>):** δ 162.37, 152.26, 144.73, 141.54 (ddq, *J* = 251.44 Hz, 12.49 Hz, 4.08 Hz), 139.53 (dt, *J* = 253.14 Hz, 13.51 Hz, 3.82 Hz), 138.02 (dm, *J* = 252.38 Hz), 132.29, 125.76 – 125.39 (m), 120.67, 117.70, 81.72, 28.26.

**<sup>19</sup>F NMR (376 MHz, CDCl<sub>3</sub>)** δ -152.37 – -152.72 (m, 2F), -158.29 (t, *J* = 21.7 Hz, 1F), -162.37 – -162.74 (m, 2F).

**N-benzyl-2-naphthamide (10p – amide)<sup>12</sup>**

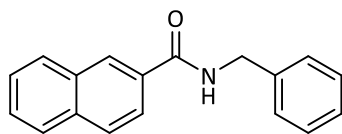

Prepared according to “Section II. General Procedure B”.

**Chromatography solvent 1:** 0-1% ethyl acetate/hexanes

**Chromatography solvent 2:** 5-20% ethyl acetate/hexanes

**Physical characteristics:** white solid

**Yield:** 106 mg (81% yield)

**<sup>1</sup>H NMR (400 MHz, CDCl<sub>3</sub>):** δ 8.31 (d, *J* = 1.6 Hz, 1H), 7.84 (dq, *J* = 6.9, 2.7 Hz, 4H), 7.52 (dddd, *J* = 19.5, 8.2, 6.8, 1.3 Hz, 2H), 7.42 – 7.25 (m, 5H), 6.91 (t, *J* = 5.7 Hz, 1H), 4.67 (d, *J* = 5.7 Hz, 2H).

**<sup>13</sup>C NMR (100 MHz, CDCl<sub>3</sub>):** δ 167.62, 138.37, 134.81, 132.67, 131.65, 129.00, 128.84, 128.51, 128.00, 127.80, 127.72, 127.64, 127.60, 126.79, 123.74, 77.16, 44.27.

**N-benzylthiophene-3-carboxamide (11)**<sup>17</sup>

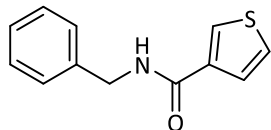

Prepared according to “Section II. General Procedure A - Amidation”.

**Chromatography solvent 1:** 0-1% ethyl acetate/hexanes

**Chromatography solvent 2:** 10 - 25% ethyl acetate/hexanes

**Physical characteristics:** white solid

**Yield:** 85 mg (78% yield)

**<sup>1</sup>H NMR (400 MHz, CDCl<sub>3</sub>):**  $\delta$  7.86 (dd,  $J$  = 2.9, 1.3 Hz, 1H), 7.39 (dd,  $J$  = 5.1, 1.3 Hz, 1H), 7.33 – 7.18 (m, 6H), 7.01 (d,  $J$  = 6.0 Hz, 1H), 4.50 (d,  $J$  = 5.9 Hz, 2H).

**<sup>13</sup>C NMR (100 MHz, CDCl<sub>3</sub>):**  $\delta$  163.17, 138.31, 137.36, 128.82, 128.53, 127.95, 127.65, 126.57, 126.21, 77.16, 43.88.

**N-benzylnicotinamide (12 – amide)**<sup>18</sup>

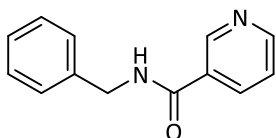

Prepared according to “Section II. General Procedure A - Amidation”.

**Chromatography solvent 1:** 5-15% ethyl acetate/hexanes

**Chromatography solvent 1:** 25-50% ethyl acetate/hexanes

**Physical characteristics:** white solid

**Yield:** 76 mg (72% yield)

**<sup>1</sup>H NMR (400 MHz, DMSO-*d*<sub>6</sub>):**  $\delta$  9.47 (t,  $J$  = 6.0 Hz, 1H), 9.08 (d,  $J$  = 2.3 Hz, 1H), 8.70 (dd,  $J$  = 4.8, 1.7 Hz, 1H), 8.27 (dt,  $J$  = 8.0, 2.0 Hz, 1H), 7.50 (dd,  $J$  = 8.0, 4.8 Hz, 1H), 7.39 – 7.11 (m, 5H), 4.50 (d,  $J$  = 5.9 Hz, 2H).

**<sup>13</sup>C NMR (100 MHz, CDCl<sub>3</sub>):**  $\delta$  164.85, 151.90, 148.57, 139.40, 135.06, 128.32, 127.31, 126.83, 123.46, 42.69, 39.53.

**N-benzylpicolinamide (13 – amide)<sup>19</sup>**

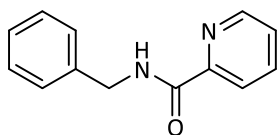

Prepared according to “Section II. General Procedure A - Amidation”.

**Chromatography solvent 1:** 5-20% ethyl acetate/hexanes

**Chromatography solvent 1:** 25-50% ethyl acetate/hexanes

**Physical characteristics:** white solid

**Yield:** 77 mg (73% yield)

**<sup>1</sup>H NMR (400 MHz, DMSO-*d*<sub>6</sub>):** δ 9.35 (t, *J* = 6.5 Hz, 1H), 8.64 (ddd, *J* = 4.8, 1.7, 0.9 Hz, 1H), 8.06 (dt, *J* = 7.8, 1.2 Hz, 1H), 7.99 (td, *J* = 7.7, 1.7 Hz, 1H), 7.59 (ddd, *J* = 7.5, 4.8, 1.3 Hz, 1H), 7.39 – 7.16 (m, 5H), 4.51 (d, *J* = 6.4 Hz, 2H).

**<sup>13</sup>C NMR (100 MHz, CDCl<sub>3</sub>):** δ 164.05, 150.07, 148.51, 139.63, 137.84, 128.31, 127.43, 126.81, 126.59, 122.06, 42.47.

**Pentafluorophenyl 2-methylquinoline-6-carboxylate (14)**

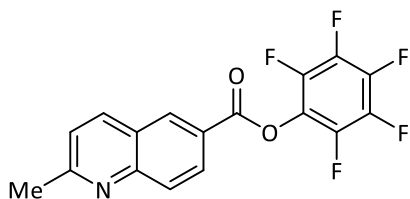

Prepared according to “Section II. General Procedure A”.

**Chromatography solvent:** 5-20% ethyl acetate/hexanes

**Physical characteristics:** yellowish brown solid

**Yield:** 140 mg (79% yield)

**HRMS:** *m/z* calculated for C<sub>17</sub>H<sub>8</sub>F<sub>5</sub>NO<sub>2</sub> [M+H]<sup>+</sup> 354.0548, found 354.0546.

**<sup>1</sup>H NMR (400 MHz, CDCl<sub>3</sub>):** δ 8.72 (d, *J* = 1.9 Hz, 1H), 8.36 (dd, *J* = 8.8, 2.0 Hz, 1H), 8.18 (d, *J* = 8.5 Hz, 1H), 8.12 (d, *J* = 8.9 Hz, 1H), 7.40 (d, *J* = 8.4 Hz, 1H), 2.80 (s, 3H).

**<sup>13</sup>C NMR (100 MHz, CDCl<sub>3</sub>):** δ 163.05, 162.50, 150.63, 141.58 (ddq, *J* = 251.36 Hz, 12.03 Hz, 4.16 Hz), 139.81 (dt, *J* = 253.63 Hz, 13.43 Hz, 3.68 Hz), 138.17 (dm, *J* = 252.66 Hz), 137.61, 132.80, 129.88, 129.39, 125.86, 125.72 – 125.34 (m), 124.11, 123.55, 25.92.

**<sup>19</sup>F NMR (376 MHz, CDCl<sub>3</sub>)** δ -152.04 – -152.77 (m, 2F), -157.73 (t, *J* = 21.6 Hz, 1F), -161.90 – -162.64 (m, 2F).

**Pentafluorophenyl 3-phenylpropanoate (15a)**<sup>20</sup>

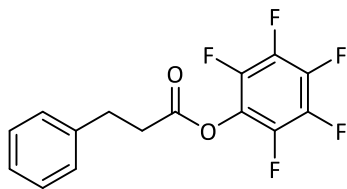

Prepared according to “Section II. General Procedure C”.

**Chromatography solvent:** 0%-5% ethyl acetate/hexanes

**Physical Characteristics:** White solid, low melting.

**Yield:** 136 mg (82% yield)

**<sup>1</sup>H NMR (400 MHz, CDCl<sub>3</sub>):** δ 7.36 – 7.29 (m, 2H), 7.28 – 7.22 (m, 4H), 3.14 – 3.06 (m, 2H), 2.99 (ddd, *J* = 8.5, 6.8, 1.2 Hz, 2H).

**<sup>13</sup>C NMR (100 MHz, CDCl<sub>3</sub>):** δ 168.89, 141.26 (ddq, *J* = 251.50 Hz, 12.77 Hz, 3.78 Hz), 139.60 (dt, *J* = 253.30, 13.53, 3.97), 139.43, 139.38 – 136.65 (dm, *J* = 254.81), 128.83, 128.37, 126.83, 125.17 (m), 35.06, 30.79

**<sup>19</sup>F NMR (376 MHz, CDCl<sub>3</sub>):** δ -152.46 – -152.63 (m, 2F), -157.99 (t, *J* = 21.7 Hz, 1F), -162.31 (dt, *J* = 21.7, 4.8 Hz, 2F).

**N-benzyl-3-(p-tolyl)propanamide (15b – amide)**<sup>21</sup>

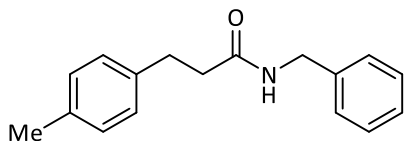

Prepared according to “Section II. General Procedure C - Amidation”.

**Chromatography solvent 1:** 0%-5% ethyl acetate/hexanes

**Chromatography solvent 2:** 15%-35% ethyl acetate/hexanes

**Physical Characteristics:** White solid

**Yield:** 105 mg (83% yield)

**<sup>1</sup>H NMR (400 MHz, CDCl<sub>3</sub>):** δ 7.34 – 7.23 (m, 3H), 7.18 – 7.11 (m, 2H), 7.09 (s, 4H), 5.62 (s, 1H), 4.40 (d, *J* = 5.6 Hz, 2H), 2.96 (t, *J* = 7.6 Hz, 2H), 2.50 (t, *J* = 7.6 Hz, 2H), 2.32 (s, 3H).

**<sup>13</sup>C NMR (100 MHz, CDCl<sub>3</sub>):** δ 172.10, 138.29, 137.78, 135.89, 129.37, 128.76, 128.41, 127.90, 127.58, 43.71, 38.81, 31.45, 21.16.

**N-benzyl-3-(4-methoxyphenyl)propanamide (15c – amide)<sup>22</sup>**

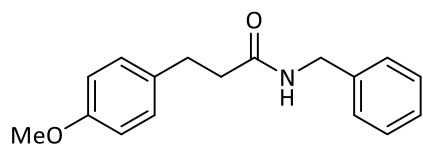

Prepared according to “Section II. General Procedure A - Amidation”.

**Chromatography solvent 1:** 5%-10% ethyl acetate/hexanes

**Chromatography solvent 2:** 25-40% ethyl acetate/hexanes

**Physical Characteristics:** White solid

**Yield:** 104 mg (78% yield)

**<sup>1</sup>H NMR (400 MHz, CDCl<sub>3</sub>):**  $\delta$  7.57 (d,  $J$  = 8.2 Hz, 2H), 7.39 – 7.20 (m, 3H), 7.19 – 7.04 (m, 2H), 6.93 (d,  $J$  = 8.0 Hz, 2H), 5.75 (s, 1H), 4.37 (d,  $J$  = 5.7 Hz, 2H), 2.92 (t,  $J$  = 7.5 Hz, 2H), 2.46 (t,  $J$  = 7.5 Hz, 2H).

**<sup>13</sup>C NMR (100 MHz, CDCl<sub>3</sub>):**  $\delta$  171.55, 140.52, 138.14, 137.67, 130.66, 128.81, 127.81, 127.63, 91.51, 43.67, 38.26, 31.24.

**N-benzyl-3-(4-chlorophenyl)propanamide (15d – amide)<sup>23</sup>**

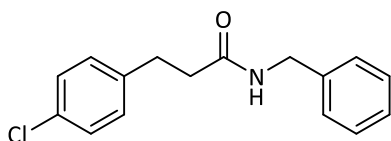

Prepared according to “Section II. General Procedure C - Amidation”.

**Chromatography solvent:** 2%-5% ethyl acetate/hexanes

**Recrystallization solvent:** Isopropyl alcohol/water

**Physical Characteristics:** White solid

**Yield:** 116 mg (85% yield)

**<sup>1</sup>H NMR (400 MHz, CDCl<sub>3</sub>):**  $\delta$  7.41 – 7.25 (m, 3H), 7.22 (d,  $J$  = 8.2 Hz, 2H), 7.18 – 6.97 (m, 4H), 6.11 (t,  $J$  = 5.8 Hz, 1H), 4.35 (d,  $J$  = 5.8 Hz, 2H), 2.93 (t,  $J$  = 7.5 Hz, 2H), 2.47 (t,  $J$  = 7.5 Hz, 2H).

**<sup>13</sup>C NMR (100 MHz, CDCl<sub>3</sub>):**  $\delta$  171.59, 139.34, 138.15, 132.16, 129.95, 128.82, 128.76, 127.84, 127.67, 43.71, 38.43, 31.10.



**N-benzyl-3-(4-bromophenyl)propanamide (15e – amide)<sup>24</sup>**

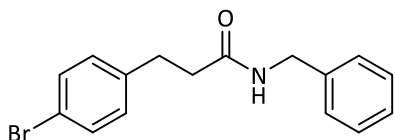

Prepared according to “Section II. General Procedure C - Amidation”.

**Chromatography solvent 1:** 2%-5% ethyl acetate/hexanes

**Chromatography solvent 2:** 20%-35% ethyl acetate/hexanes

**Physical Characteristics:** White solid

**Yield:** 146 mg (92% yield)

**<sup>1</sup>H NMR (400 MHz, CDCl<sub>3</sub>):** 7.43 – 7.35 (m, 2H), 7.35 – 7.24 (m, 3H), 7.17 – 7.09 (m, 2H), 7.09 – 6.99 (m, 2H), 6.01 (s, 1H), 4.37 (d, *J* = 5.8 Hz, 2H), 2.93 (t, *J* = 7.5 Hz, 2H), 2.48 (t, *J* = 7.5 Hz, 2H).

**<sup>13</sup>C NMR (100 MHz, CDCl<sub>3</sub>):** δ 171.52, 139.87, 138.15, 131.75, 130.38, 128.86, 127.88, 127.71, 120.23, 43.76, 38.42, 31.18.

**N-benzyl-3-(4-iodophenyl)propanamide (15f – amide)**

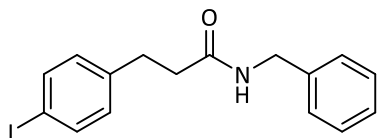

Prepared according to “Section II. General Procedure A - Amidation”.

**Chromatography solvent 1:** 2%-5% ethyl acetate/hexanes

**Chromatography solvent 2:** 20%-35% ethyl acetate/hexanes

**Physical Characteristics:** White solid

**Yield:** 100 mg (55% yield)

**ESI-HRMS:** *m/z* calculated for C<sub>16</sub>H<sub>16</sub>INO [M+H]<sup>+</sup> 366.0349, found 366.0348

**<sup>1</sup>H NMR (400 MHz, CDCl<sub>3</sub>):** δ 7.56 (d, *J* = 8.3 Hz, 2H), 7.34 – 7.20 (m, 3H), 7.16 – 7.04 (m, 2H), 6.92 (d, *J* = 8.3 Hz, 2H), 5.74 (s, 1H), 4.35 (d, *J* = 5.7 Hz, 2H), 2.90 (t, *J* = 7.5 Hz, 2H), 2.45 (t, *J* = 7.5 Hz, 2H).

**<sup>13</sup>C NMR (100 MHz, CDCl<sub>3</sub>):** δ 171.55, 140.53, 138.15, 137.67, 130.67, 128.82, 127.81, 127.63, 91.51, 43.67, 38.26, 31.24.

**Pentafluorophenyl 3-(4-(trifluoromethyl)phenyl)propanoate (15g)<sup>25</sup>**

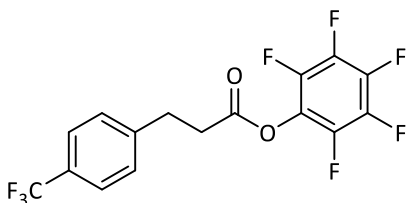

Prepared according to “Section II. General Procedure C”.

**Chromatography solvent 1:** 0%-5% ethyl acetate/hexanes

**Physical Characteristics:** White solid

**Yield:** 150 mg (78% yield)

**<sup>1</sup>H NMR (400 MHz, CDCl<sub>3</sub>):** δ 7.59 (d, *J* = 8.0 Hz, 2H), 7.37 (d, *J* = 8.0 Hz, 2H), 3.15 (t, *J* = 7.5 Hz, 2H), 3.02 (t, *J* = 6.9 Hz, 2H).

**<sup>13</sup>C NMR (100 MHz, CDCl<sub>3</sub>):** δ 168.56, 143.49, 141.23 (ddq, *J* = 251.15 Hz, 12.65 Hz, 4.25 Hz), 139.71 (dt, *J* = 253.49 Hz, 13.50 Hz, 4.04 Hz), 138.04 (dm, *J* = 252.60 Hz), 129.31 (q, *J* = 32.47 Hz), 125.80 (q, *J* = 3.77 Hz), 125.27 - 124.88 (m), 124.36 (q, *J* = 272.07 Hz), 34.58, 30.51.

**<sup>19</sup>F NMR (376 MHz, CDCl<sub>3</sub>):** δ -62.52 (m, 3F), -152.00 – -153.42 (m, 2F), -157.72 (t, *J* = 21.7 Hz, 1F), -161.59 – -162.72 (m, 2F).

**N-benzyl-3-(furan-2-yl)propanamide (16 – amide)<sup>26</sup>**

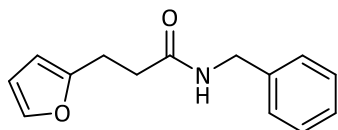

Prepared according to “Section II. General Procedure C - Amidation”.

**Chromatography solvent 1:** 2.5-7.5% ethyl acetate/hexanes

**Chromatography solvent 2:** 25-40% ethyl acetate/hexanes

**Physical Characteristics:** White solid

**Yield:** 91 mg (79% yield)

**<sup>1</sup>H NMR (400 MHz, CDCl<sub>3</sub>):** δ 7.39 – 7.20 (m, 6H), 6.29 (dd, *J* = 3.2, 1.9 Hz, 1H), 6.05 (dd, *J* = 3.2, 1.0 Hz, 1H), 5.78 (s, 1H), 4.44 (d, *J* = 5.8 Hz, 2H), 3.09 – 2.99 (m, 2H), 2.57 (t, *J* = 7.5 Hz, 2H).

**<sup>13</sup>C NMR (100 MHz, CDCl<sub>3</sub>):** δ 171.64, 154.39, 141.34, 138.25, 128.81, 127.90, 127.64, 110.39, 105.77, 43.76, 35.19, 24.22.

**Pentafluorophenyl hex-5-enoate (17)**<sup>27</sup>

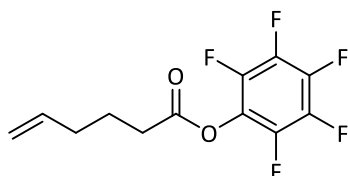

Prepared according to “Section II. General Procedure B”.

**Chromatography solvent:** 0-0.4% ethyl acetate/hexanes

**Physical Characteristics:** colorless oil, slight foul odor

**Yield:** 82 mg (58% yield)

**<sup>1</sup>H NMR (400 MHz, CDCl<sub>3</sub>):** δ 5.80 (ddt, *J* = 17.0, 10.2, 6.8 Hz, 1H), 5.14 – 5.00 (m, 2H), 2.68 (t, *J* = 7.4 Hz, 2H), 2.32 – 2.15 (m, 2H), 1.88 (p, *J* = 7.4 Hz, 2H).

**<sup>13</sup>C NMR (100 MHz, CDCl<sub>3</sub>):** δ 169.55, 141.31 (ddq, *J* = 250.98 Hz, 12.32 Hz, 4.32 Hz), 138.08 (dt, *J* = 253.09 Hz, 13.39 Hz, 3.93 Hz), 138.03 (dtdd, *J* = 252.91 Hz, 13.76 Hz, 5.02 Hz, 2.24 Hz), 137.10, 125.46 – 125.09 (m), 116.19, 32.85, 32.59, 23.92.

**<sup>19</sup>F NMR (376 MHz, CDCl<sub>3</sub>):** δ -149.87 – -155.77 (m, 2F), -158.15 (t, *J* = 21.6 Hz, 1F), -161.35 – -164.92 (m, 2F).

**Pentafluorophenyl 6-bromohexanoate (18)**<sup>28</sup>

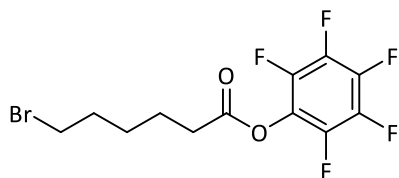

Prepared according to “Section II. General Procedure C”.

**Chromatography solvent:** 0-3% ethyl acetate/hexanes

**Physical Characteristics:** clear oil

**Yield:** 134 mg (74% yield)

**<sup>1</sup>H NMR (400 MHz, CDCl<sub>3</sub>):** δ 3.43 (t, *J* = 6.7 Hz, 2H), 2.69 (t, *J* = 7.4 Hz, 2H), 1.98 – 1.87 (m, 2H), 1.81 (dt, *J* = 15.2, 7.4 Hz, 2H), 1.63 – 1.53 (m, 2H).

**<sup>13</sup>C NMR (100 MHz, CDCl<sub>3</sub>):** δ 169.36, 141.26 (ddq, *J* = 251.19 Hz, 12.46 Hz, 4.43 Hz), 139.58 (dt, *J* = 253.25 Hz, 13.70 Hz, 4.02 Hz), 138.00 (dm, *J* = 254.79 Hz), 125.37 – 125.00 (m), 33.30, 33.22, 32.36, 27.50, 24.03z.

**<sup>19</sup>F NMR (376 MHz, CDCl<sub>3</sub>):** δ -152.60 – -152.76 (m, 2F), -157.59 (t, *J* = 21.8 Hz, 1F), -162.13 – -162.36 (m, 2F).

### Benzyl pentafluorophenyl hexanedioate (19)<sup>29</sup>

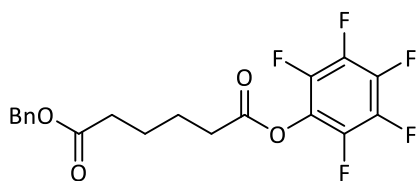

Prepared according to “Section II. General Procedure A”.

**Chromatography solvent 1:** 2-10% ethyl acetate/hexanes

**Physical Characteristics:** clear oil

**Yield:** 131 mg (65% yield)

**<sup>1</sup>H NMR (400 MHz, CDCl<sub>3</sub>):**  $\delta$  7.42 – 7.28 (m, 5H), 5.15 (s, 2H), 2.76 – 2.63 (m, 2H), 2.45 (t,  $J$  = 6.8 Hz, 2H), 1.81 (dtq,  $J$  = 6.9, 4.9, 2.3 Hz, 4H).

**<sup>13</sup>C NMR (100 MHz, CDCl<sub>3</sub>):**  $\delta$  172.91, 169.16, 141.21 (ddq,  $J$  = 251.19 Hz, 12.04 Hz, 4.20 Hz), 139.51 (dt,  $J$  = 253.06 Hz, 13.54 Hz, 4.11 Hz), 137.95 (dm,  $J$  = 254.37 Hz), 136.04, 128.60, 128.28, 128.26, 125.22 – 124.85 (m), 66.34, 33.74, 32.97, 24.18, 24.14.

**<sup>19</sup>F NMR (376 MHz, CDCl<sub>3</sub>)**  $\delta$  -152.72 – -153.17 (m, 2F), -158.18 (t,  $J$  = 21.6 Hz, 1F), -162.33 – -162.63 (m, 2F).

### N-benzylcyclopropanecarboxamide (20 – amide)<sup>30</sup>

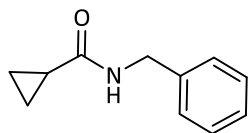

Prepared according to “Section II. General Procedure A - Amidation”.

**Chromatography solvent 1:** 0-2.5% ethyl acetate/hexanes

**Chromatography solvent 2:** 15-30% ethyl acetate/hexanes

**Physical Characteristics:** White solid

**Yield:** 58 mg (64% yield)

**<sup>1</sup>H NMR (400 MHz, CDCl<sub>3</sub>):**  $\delta$  7.36 – 7.30 (m, 2H), 7.30 – 7.21 (m, 3H), 6.25 (s, 1H), 4.42 (d,  $J$  = 5.8 Hz, 2H), 1.38 (ddd,  $J$  = 7.9, 4.5, 3.3 Hz, 1H), 1.03 – 0.90 (m, 2H), 0.73 (dt,  $J$  = 8.0, 3.4 Hz, 2H).

**<sup>13</sup>C NMR (100 MHz, CDCl<sub>3</sub>):**  $\delta$  173.65, 138.62, 128.72, 127.86, 127.47, 43.83, 14.75, 7.26.

**N-benzylcyclobutanecarboxamide (21 – amide)<sup>30</sup>**

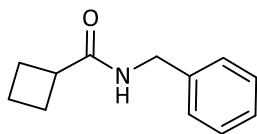

Prepared according to “Section II. General Procedure A - Amidation”.

**Chromatography solvent 1:** 0-2.5% ethyl acetate/hexanes

**Chromatography solvent 2:** 15-30% ethyl acetate/hexanes

**Physical Characteristics:** White solid

**Yield:** 63 mg (64% yield)

**<sup>1</sup>H NMR (400 MHz, CDCl<sub>3</sub>):**  $\delta$  7.31 (d,  $J$  = 7.0 Hz, 2H), 7.29 – 7.21 (m, 3H), 5.89 (s, 1H), 4.41 (d,  $J$  = 5.7 Hz, 2H), 3.03 (p,  $J$  = 8.5 Hz, 1H), 2.30 (pd,  $J$  = 9.1, 2.3 Hz, 2H), 2.20 – 2.08 (m, 2H), 2.02 – 1.80 (m, 2H).

**<sup>13</sup>C NMR (100 MHz, CDCl<sub>3</sub>):**  $\delta$  174.93, 138.61, 128.73, 127.82, 127.48, 43.50, 39.95, 25.44, 18.25.

**Pentafluorophenyl cyclohexanecarboxylate (22)<sup>31</sup>**

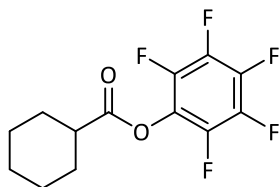

Prepared according to “Section II. General Procedure A”.

**Chromatography solvent 1:** 0-2.5% ethyl acetate/hexanes

**Physical Characteristics:** Transparent oily solid, low melting

**Yield:** 109 mg (64% yield)

**<sup>1</sup>H NMR (400 MHz, CDCl<sub>3</sub>):**  $\delta$  2.70 (tt,  $J$  = 11.0, 3.8 Hz, 1H), 2.07 (dt,  $J$  = 13.2, 4.1 Hz, 2H), 1.83 (dt,  $J$  = 12.8, 3.8 Hz, 2H), 1.64 (tp,  $J$  = 16.2, 4.8 Hz, 3H), 1.47 – 1.23 (m, 3H).

**<sup>13</sup>C NMR (100 MHz, CDCl<sub>3</sub>):**  $\delta$  172.01, 141.36 (ddq,  $J$  = 251.32 Hz, 12.52 Hz, 4.17 Hz), 139.49 (dt,  $J$  = 252.88 Hz, 13.67 Hz, 3.90 Hz), 138.04 (dm,  $J$  = 254.26 Hz), 125.36, 42.51, 28.97, 25.69, 25.26.

**<sup>19</sup>F NMR (376 MHz, CDCl<sub>3</sub>):**  $\delta$  -155.07 – -155.81 (m, 2F), -160.76 (t,  $J$  = 20.9 Hz, 1F), -164.49 – -165.07 (m, 2F).

**Pentafluorophenyl trans-4-((tert-butoxycarbonyl)amino)cyclohexane-1-carboxylate (23)**

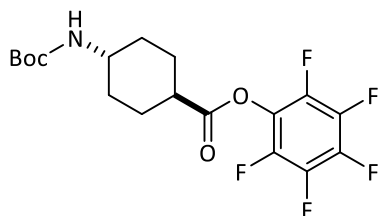

Prepared according to "Section II. General Procedure A".

**Chromatography solvent:** 0%-12% ethyl acetate/hexanes

**Physical Characteristics:** White solid,

**Yield:** 170 mg (83% yield)

**ESI-HRMS:** m/z calculated for C<sub>18</sub>H<sub>20</sub>F<sub>5</sub>NO<sub>4</sub> [M+Na]<sup>+</sup> 432.1205, found 432.1202

**<sup>1</sup>H NMR (400 MHz, CDCl<sub>3</sub>):** δ 4.42 (d, *J* = 8.1 Hz, 1H), 3.48 (s, 1H), 2.61 (tt, *J* = 12.2, 3.5 Hz, 1H), 2.25 – 2.11 (m, 4H), 1.69 (qd, *J* = 13.9, 3.8 Hz, 2H), 1.45 (s, 9H), 1.21 (qd, *J* = 13.5, 3.8 Hz, 2H).

**<sup>13</sup>C NMR (100 MHz, CDCl<sub>3</sub>):** δ 171.38, 141.21 (ddq, *J* = 251.35 Hz, 12.54 Hz, 4.34 Hz), 139.51 (dt, *J* = 252.97, 13.62, 3.92), 137.96 (dm, *J* = 253.95), 155.26, 125.27, 79.47, 48.85, 41.98, 32.29, 28.48, 27.77.

**N-benzyladamantane-2-carboxamide (24 – amide)**

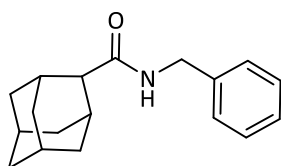

Prepared according to "Section II. General Procedure A - Amidation".

**Chromatography solvent 1:** 0-3% ethyl acetate/hexanes

**Chromatography solvent 2:** 15-30% ethyl acetate/hexanes

**Physical Characteristics:** White solid

**Yield:** 104 mg (77% yield)

**ESI-HRMS:** m/z calculated for C<sub>18</sub>H<sub>23</sub>NO [M+H]<sup>+</sup> 270.1852, found 270.1853

**<sup>1</sup>H NMR (400 MHz, CDCl<sub>3</sub>):** δ 7.38 – 7.29 (m, 2H), 7.27 (d, *J* = 7.3 Hz, 3H), 6.07 (s, 1H), 4.47 (d, *J* = 5.7 Hz, 2H), 2.50 (s, 1H), 2.28 (s, 2H), 1.99 (d, *J* = 12.7 Hz, 2H), 1.94 – 1.80 (m, 4H), 1.75 (d, *J* = 10.9 Hz, 4H), 1.62 (d, *J* = 12.7 Hz, 2H).

**<sup>13</sup>C NMR (100 MHz, CDCl<sub>3</sub>):** δ 174.13, 138.90, 128.70, 127.78, 127.38, 77.16, 50.06, 43.44, 38.41, 37.42, 33.40, 30.06, 27.55, 27.45.

**N-benzyladamantane-1-carboxamide (25 – amide)<sup>25</sup>**

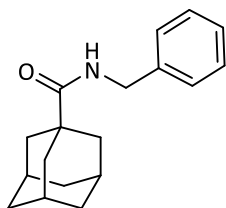

Prepared according to “Section II. General Procedure A - Amidation”.

**Chromatography solvent 1:** 0-3% ethyl acetate/hexanes

**Chromatography solvent 2:** 15-30% ethyl acetate/hexanes

**Physical Characteristics:** White solid

**Yield:** 96 mg (71% yield)

**<sup>1</sup>H NMR (400 MHz, CDCl<sub>3</sub>):** δ 7.31 (dd, *J* = 7.9, 6.3 Hz, 2H), 7.28 – 7.21 (m, 3H), 5.87 (s, 1H), 4.41 (d, *J* = 5.5 Hz, 2H), 2.02 (p, *J* = 3.1 Hz, 3H), 1.86 (d, *J* = 3.0 Hz, 6H), 1.76 – 1.63 (m, 6H).

**<sup>13</sup>C NMR (100 MHz, CDCl<sub>3</sub>):** δ 177.94, 138.80, 128.81, 127.76, 127.51, 43.45, 40.78, 39.43, 36.63, 28.25.

**Pentafluorophenyl 2,3-dihydrobenzo[b][1,4]dioxine-2-carboxylate (26)**

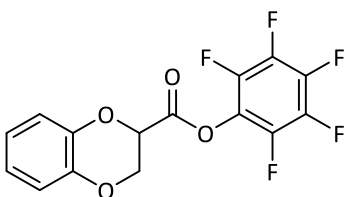

Prepared according to “Section II. General Procedure C”.

**Chromatography solvent 1:** 2-10% ethyl acetate/hexanes

**Physical Characteristics:** Transparent oily solid, low melting

**Yield:** 123 mg (71% yield)

**ESI HRMS:** *m/z* calculated for C<sub>15</sub>H<sub>7</sub>F<sub>5</sub>O<sub>4</sub>Na [M+Na]<sup>+</sup> 369.0157, found 369.0151

**<sup>1</sup>H NMR (400 MHz, CDCl<sub>3</sub>):** δ 7.08 – 6.99 (m, 1H), 6.97 – 6.88 (m, 3H), 5.24 (dd, *J* = 4.0, 2.8 Hz, 1H), 4.62 (dd, *J* = 11.6, 4.0 Hz, 1H), 4.49 (dd, *J* = 11.5, 2.8 Hz, 1H).

**<sup>13</sup>C NMR (100 MHz, CDCl<sub>3</sub>):** 164.69, 142.96, 141.83, 139.05 (ddq, *J* = 252.63 Hz, 12.69 Hz, 4.29 Hz), 138.78 (dt, *J* = 254.55 Hz, 13.60 Hz, 4.11 Hz), 138.04 (dm, 255.49 Hz), 124.70 – 124.28 (m), 122.67, 122.52, 117.70, 117.53, 71.86, 64.75.

**<sup>19</sup>F NMR (376 MHz, CDCl<sub>3</sub>):** δ -152.09 – -152.39 (m, 2F), -156.64 (t, *J* = 21.8 Hz, 1F), -161.42 – -161.71 (m, 2F).

**N-benzyl-2-phenylacetamide (27 – amide)<sup>32</sup>**

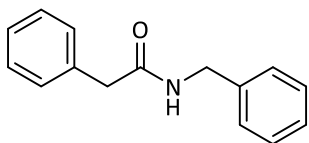

Prepared according to “Section II. General Procedure A - Amidation”.

**Chromatography solvent 1:** 0-5% ethyl acetate/hexanes

**Chromatography solvent 2:** 20-35% ethyl acetate/hexanes

**Physical Characteristics:** White solid

**Yield:** 93 mg (82% yield)

**<sup>1</sup>H NMR (400 MHz, CDCl<sub>3</sub>):** δ 7.40 – 7.21 (m, 8H), 7.21 – 7.13 (m, 2H), 5.84 (s, 1H), 4.40 (d, *J* = 5.8 Hz, 2H), 3.62 (s, 2H).

**<sup>13</sup>C NMR (100 MHz, CDCl<sub>3</sub>):** δ 171.04, 138.22, 134.88, 129.55, 129.15, 128.75, 127.59, 127.53, 127.50, 43.88, 43.68.

**Pentafluorophenyl 9H-xanthene-9-carboxylate (28)**

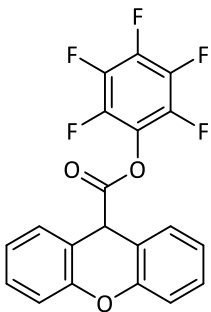

Prepared according to “Section II. General Procedure A”.

**Chromatography solvent 1:** 2-15% ethyl acetate/hexanes

**Physical Characteristics:** white solid

**Yield:** 140 mg (71% yield)

**ESI HRMS:** *m/z* calculated for C<sub>20</sub>H<sub>11</sub>F<sub>5</sub>O<sub>3</sub>Na [M+Na]<sup>+</sup> 417.0521, found 417.0518

**<sup>1</sup>H NMR (400 MHz, CDCl<sub>3</sub>):** δ 7.44 – 7.33 (m, 4H), 7.24 – 7.11 (m, 4H), 5.38 (s, 1H).

**<sup>13</sup>C NMR (100 MHz, CDCl<sub>3</sub>):** δ 167.90, 151.27, 141.11 (ddq, *J* = 252.35 Hz, 12.68 Hz, 4.23 Hz), 139.69 (dt, *J* = 253.53 Hz, 13.66 Hz, 4.13 Hz), 137.91 (dm, *J* = 252.55 Hz), 130.02, 129.00, 125.16 (m), 123.80, 117.48, 116.44, 44.88.

**<sup>19</sup>F NMR (376 MHz, CDCl<sub>3</sub>):** δ -152.60 – -152.76 (m, 2F), -157.59 (t, *J* = 21.8 Hz, 1F), -162.13 – -162.36 (m, 2F).



**Pentafluorophenyl 2-(2-fluoro-[1,1'-biphenyl]-4-yl)propanoate (29)**

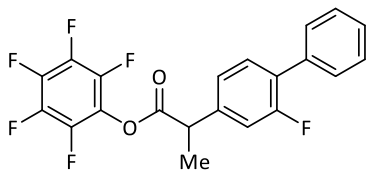

Prepared according to “Section II. General Procedure C”.

**Chromatography solvent:** 0-2% ethyl acetate/hexanes

**Physical characteristics:** white solid

**Yield:** 143 mg (70% yield)

**ESI HRMS:** m/z calculated for C<sub>21</sub>H<sub>12</sub>F<sub>6</sub>O<sub>2</sub>Na [M+Na]<sup>+</sup> 433.0634, found 433.0627

**<sup>1</sup>H NMR (400 MHz, CDCl<sub>3</sub>):** δ 7.56 (dt, *J* = 8.2, 1.5 Hz, 2H), 7.46 (td, *J* = 7.8, 3.5 Hz, 3H), 7.42 – 7.35 (m, 1H), 7.25 – 7.17 (m, 2H), 4.12 (q, *J* = 7.2 Hz, 1H), 1.70 (d, *J* = 7.2 Hz, 3H).

**<sup>13</sup>C NMR (100 MHz, CDCl<sub>3</sub>):** δ 170.23, 159.95 (d, *J* = 249.1 Hz), 141.24 (ddq, *J* = 250.03 Hz, 12.26 Hz, 4.13 Hz), 139.98 (d, *J* = 7.8 Hz), 139.67 (dtt, *J* = 253.24 Hz, 13.84 Hz, 4.37 Hz), 138.00 (dm, *J* = 252.63), 135.36 (d, *J* = 1.3 Hz), 131.32 (d, *J* = 4.0 Hz), 129.10 (d, *J* = 3.0 Hz), 128.78, 128.63, 127.99, 125.42-125.07 (m), 123.66 (d, *J* = 3.5 Hz), 115.50 (d, *J* = 24.1 Hz), 44.66, 18.57.

**<sup>19</sup>F NMR (376 MHz, CDCl<sub>3</sub>):** δ -116.94 (s, 1F), -149.87 – -155.43 (m, 2F), -157.73 (t, *J* = 21.7 Hz, 1F), -161.11 – -163.67 (m, 2F).

**Pentafluorophenyl 2-(4-isobutylphenyl)propanoate (30)<sup>33</sup>**

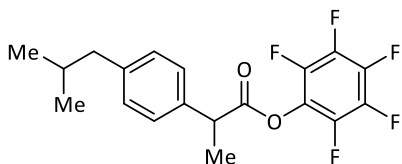

Prepared according to “Section II. General Procedure C”.

**Chromatography solvent:** 0-2% ethyl acetate/hexanes

**Physical characteristics:** white solid

**Yield:** 132 mg (71% yield)

**<sup>1</sup>H NMR (400 MHz, CDCl<sub>3</sub>):** δ 7.32 (d, *J* = 8.2 Hz, 2H), 7.20 (d, *J* = 8.2 Hz, 2H), 4.10 (q, *J* = 7.1 Hz, 1H), 2.53 (d, *J* = 7.2 Hz, 2H), 1.91 (n, *J* = 6.8 Hz, 1H), 1.69 (d, *J* = 7.2 Hz, 3H), 0.96 (d, *J* = 6.8 Hz, 6H).

**<sup>13</sup>C NMR (100 MHz, CDCl<sub>3</sub>):** δ 170.93, 141.48, 141.27 (ddq, *J* = 248.90 Hz, 12.40 Hz, 4.44 Hz), 139.53 (dtt, *J* = 253.35 Hz, 13.57 Hz, 3.98 Hz), 137.95 (dm, *J* = 252.18 Hz), 136.09, 129.78, 127.31, 125.59 – 125.22 (m), 45.19, 44.84, 30.34, 22.49, 22.47, 18.66.

**<sup>19</sup>F NMR (376 MHz, CDCl<sub>3</sub>):** δ -147.52 – -155.21 (m, 2F), -158.25 (t, *J* = 21.7 Hz, 1F), -161.26 – -164.99 (m, 2F).

**tert-butyl (3-(benzylamino)-3-oxopropyl)carbamate (31 – amide)<sup>34</sup>**

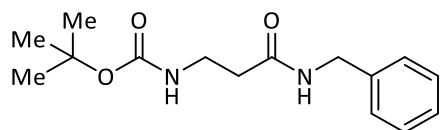

Prepared according to “Section II. General Procedure B - Amidation”.

**Physical characteristics:** White powder

**Chromatography solvent:** 3-7% ethyl acetate/hexanes

**Chromatography solvent 2:** 30-45% ethyl acetate/hexanes

**Yield:** 104 mg (75% yield)

**<sup>1</sup>H NMR (400 MHz, CD<sub>3</sub>CN):**  $\delta$  7.34 – 7.28 (m, 2H), 7.28 – 7.22 (m, 3H), 6.63 (s, 1H), 5.06 (s, 1H), 4.43 (d,  $J$  = 5.8 Hz, 2H), 4.19 (s, 1H), 1.40 (s, 9H), 1.37 (d,  $J$  = 7.1 Hz, 3H).

**<sup>13</sup>C NMR (100 MHz, CD<sub>3</sub>CN):**  $\delta$  172.69, 155.72, 138.20, 128.80, 127.70, 127.58, 80.32, 50.30, 43.52, 28.40, 18.40.

**Pentafluorophenyl ((benzyloxy)carbonyl)-D-alaninate (32)**

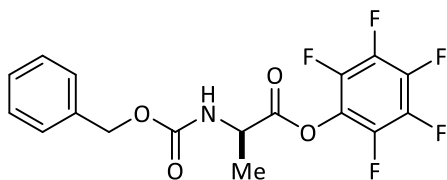

Prepared according to “Section II. General Procedure B”.

**Physical characteristics:** white solid

**Chromatography solvent:** 2-5% ethyl acetate/hexanes

**Yield:** 146 mg (75% yield)

**ESI-HRMS:** m/z calculated for C<sub>17</sub>H<sub>12</sub>F<sub>5</sub>NO<sub>4</sub>Na [M+Na]<sup>+</sup> 412.0579, found 412.0576

**$[\alpha]_D^{30}$**  = +24.5  $\pm$  0.9 (c=0.5) EtOAc

**Enantiomeric excess (determined by amidation)** = >99%

**<sup>1</sup>H NMR (400 MHz, CDCl<sub>3</sub>):**  $\delta$  7.39 – 7.32 (m, 5H), 5.26 (d,  $J$  = 7.9 Hz, 1H), 5.15 (d,  $J$  = 3.9 Hz, 2H), 4.76 (p,  $J$  = 7.2 Hz, 1H), 1.62 (d,  $J$  = 7.2 Hz, 3H).

**<sup>13</sup>C NMR (100 MHz, CDCl<sub>3</sub>):**  $\delta$  169.59, 155.83, 141.05 (ddq,  $J$  = 251.67 Hz, 12.74 Hz, 3.93 Hz), 139.67 (dt,  $J$  = 253.73 Hz, 13.67 Hz, 3.91 Hz), 137.89 (dtdd,  $J$  = 252.71 Hz, 13.44 Hz, 5.56 Hz, 2.91 Hz), 136.09, 128.50, 128.22, 128.12, 125.03 – 124.66 (m), 67.24, 49.59, 17.81.

**<sup>19</sup>F NMR (376 MHz, CDCl<sub>3</sub>):**  $\delta$  -151.29 – -154.49 (m, 2F), -157.72 (t,  $J$  = 21.4 Hz, 1F), -160.88 – -164.57 (m, 2F).

**tert-butyl (S)-(1-(benzylamino)-1-oxopropan-2-yl)carbamate (33 – amide)<sup>35</sup>**

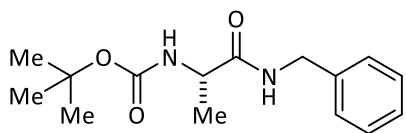

Prepared according to “Section II. General Procedure A - Amidation”.

**Chromatography solvent:** 3-7% ethyl acetate/hexanes

**Chromatography solvent 2:** 30-45% ethyl acetate/hexanes

**Physical characteristics:** white solid

**Yield:** 113 mg (81% yield)

$[\alpha]_D^{30} = -20.4 \pm 0.4$  (c=0.5) CH<sub>2</sub>Cl<sub>2</sub>

**Enantiomeric excess (determined by diastereomeric amidation) = >99%**

**<sup>1</sup>H NMR (400 MHz, CDCl<sub>3</sub>):**  $\delta$  7.34 – 7.28 (m, 2H), 7.28 – 7.22 (m, 3H), 6.63 (s, 1H), 5.06 (s, 1H), 4.43 (d,  $J = 5.8$  Hz, 2H), 4.19 (s, 1H), 1.40 (s, 9H), 1.37 (d,  $J = 7.1$  Hz, 3H).

**<sup>13</sup>C NMR (100 MHz, CDCl<sub>3</sub>):**  $\delta$  172.69, 155.71, 138.19, 128.80, 127.70, 127.58, 80.32, 77.16, 50.29, 43.52, 28.40, 18.40.

**Pentafluorophenyl (((9H-fluoren-9-yl)methoxy)carbonyl)-L-alaninate (34)<sup>36</sup>**

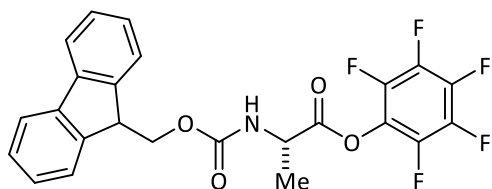

Prepared according to “Section II. General Procedure C”.

**Physical characteristics:** white solid

**Chromatography solvent:** 5-15% ethyl acetate/hexanes

**Yield:** 193 mg (81% yield)

$[\alpha]_D^{30} = -33.6 \pm 2.2$  (c=0.5) CH<sub>2</sub>Cl<sub>2</sub>

**Enantiomeric excess (determined by diastereomeric amidation) = >99%**

**<sup>1</sup>H NMR (400 MHz, DMSO-*d*<sub>6</sub>):**  $\delta$  8.18 (d, 7.1 Hz, 1H), 7.78 (d,  $J = 7.1$  Hz, 2H), 7.72 (dd,  $J = 7.5, 3.4$  Hz, 2H), 7.48 – 7.24 (m, 4H), 4.53 (t,  $J = 7.1$  Hz, 1H), 4.45 – 4.16 (m, 3H), 1.49 (d,  $J = 7.3$  Hz, 3H).

**<sup>13</sup>C NMR (101 MHz, DMSO-*d*<sub>6</sub>):**  $\delta$  169.80, 155.94, 143.74, 143.71, 140.77, 140.52 (dm,  $J = 250.69$  Hz), 139.28 (dm,  $J = 252.39$  Hz), 137.49 (dm,  $J = 251.08$  Hz), 127.65, 127.07, 125.15, 125.13, 124.56 – 124.20 (m), 120.14, 65.83, 49.34, 46.59, 39.53, 16.57.

**<sup>19</sup>F NMR (376 MHz, DMSO-*d*<sub>6</sub>):**  $\delta$  -153.56 (d,  $J = 23.1$  Hz), -157.83 (t,  $J = 23.1$  Hz), -162.52 (t,  $J = 23.1$  Hz).

**Pentafluorophenyl ((benzyloxy)carbonyl)-L-serinate (35)**

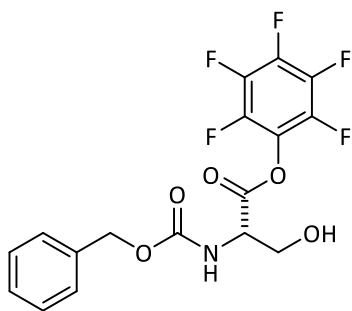

Prepared according to “Section II. General Procedure A”.

**Physical characteristics:** White needle-like crystals

**Chromatography solvent:** 10-25% ethyl acetate/hexanes

**Yield:** 105 mg (52% yield)

**ESI-HRMS:** m/z calculated for C<sub>17</sub>H<sub>12</sub>F<sub>5</sub>NO<sub>5</sub>Na [M+Na]<sup>+</sup> 428.0528, found 428.0525

$[\alpha]_D^{30} = -18.3 \pm 1.1$  (c=0.5) EtOAc

**Enantiomeric excess (determined by diastereomeric amidation) = >99%**

**<sup>1</sup>H NMR (400 MHz, CD<sub>3</sub>CN):** δ 7.50 – 7.20 (m, 5H), 6.32 (d, *J* = 7.9 Hz, 1H), 5.13 (s, 2H), 4.69 (dt, *J* = 8.3, 4.2 Hz, 1H), 4.06 (dd, *J* = 11.4, 4.5 Hz, 1H), 3.94 (dd, *J* = 11.3, 4.0 Hz, 1H), 3.50 (s, 1H).

**<sup>13</sup>C NMR (100 MHz, CD<sub>3</sub>CN):** δ 168.46, 157.18, 141.99 (ddq, *J* = 249.49 Hz, 12.17 Hz, 4.14 Hz), 140.65 (dt, *J* = 250.51 Hz, 13.66 Hz, 4.30 Hz), 138.98 (dm, *J* = 249.35 Hz), 137.79, 129.40, 128.94, 128.68, 125.91–125.55, 67.48, 62.38, 57.23.

**<sup>19</sup>F NMR (376 MHz, CD<sub>3</sub>CN):** δ -153.88 – -154.76 (m, 2F), -159.94 (t, *J* = 21.0 Hz, 1F), -163.76 – -164.78 (m, 2F).

**Benzyl (S)-(1-(benzylamino)-3-(benzyloxy)-1-oxopropan-2-yl)carbamate (36 – amide)**

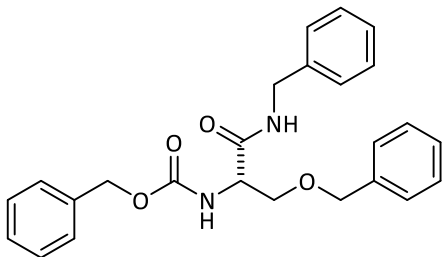

Prepared according to “Section II. General Procedure B - Amidation”.

**Physical characteristics:** White powder

**Chromatography solvent:** 5-12% ethyl acetate/hexanes

**Chromatography solvent 2:** 40-65% ethyl acetate/hexanes

**Yield:** 151 mg (72% yield)

**ESI-HRMS:** m/z calculated for C<sub>25</sub>H<sub>27</sub>N<sub>2</sub>O<sub>4</sub> [M+H]<sup>+</sup> 419.1965, found 419.1963

**<sup>1</sup>H NMR (400 MHz, CDCl<sub>3</sub>):** δ 7.46 – 7.13 (m, 15H), 6.79 (t, *J* = 5.8 Hz, 1H), 5.95 – 5.63 (m, 1H), 5.11 (s, 2H), 4.47 (tq, *J* = 15.3, 8.9 Hz, 5H), 3.96 (dd, *J* = 9.4, 3.8 Hz, 1H), 3.60 (dd, *J* = 9.2, 6.5 Hz, 1H).

**<sup>13</sup>C NMR (100 MHz, CDCl<sub>3</sub>):** δ 169.90, 156.17, 137.89, 137.34, 136.11, 128.77, 128.66, 128.60, 128.37, 128.24, 128.05, 127.88, 127.65, 127.56, 73.62, 69.99, 67.30, 54.51, 43.64.

**Benzyl (R)-(1-(benzylamino)-3-(benzylthio)-1-oxopropan-2-yl)carbamate (37 – amide)**

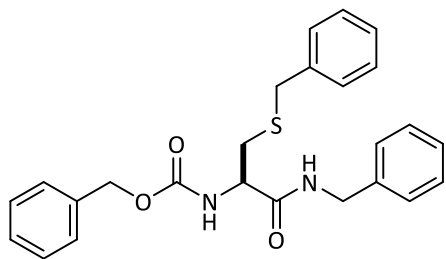

Prepared according to “Section II. General Procedure A - Amidation”.

**Physical characteristics:** White powder

**Chromatography solvent:** 5-12% ethyl acetate/hexanes

**Chromatography solvent 2:** 40-65% ethyl acetate/hexanes

**Yield:** 151 mg (72% yield)

$[\alpha]_D^{30} = +8.4 \pm 0.2$  (c=0.5) CH<sub>2</sub>Cl<sub>2</sub> **Enantiomeric excess (determined by amidation)** = >99%

**ESI-HRMS:** m/z calculated for C<sub>25</sub>H<sub>27</sub>N<sub>2</sub>O<sub>3</sub>S [M+H]<sup>+</sup> 435.1737, found 435.1736

**<sup>1</sup>H NMR (400 MHz, CDCl<sub>3</sub>):** δ 7.56 – 6.59 (m, 16H), 5.90 (d, *J* = 8.1 Hz, 1H), 4.95 (q, *J* = 12.2 Hz, 2H), 4.29 (ddd, *J* = 39.0, 15.1, 6.0 Hz, 3H), 3.62 (s, 2H), 2.75 (qd, *J* = 13.9, 6.5 Hz, 2H).

**<sup>13</sup>C NMR (100 MHz, CDCl<sub>3</sub>):** δ 170.34, 156.10, 137.92, 137.62, 136.01, 128.97, 128.64, 128.57, 128.51, 128.20, 128.02, 127.66, 127.49, 127.18, 67.09, 54.31, 43.55, 36.52, 33.98.

**Pentafluorophenyl ((benzyloxy)carbonyl)-L-methioninate (38)**

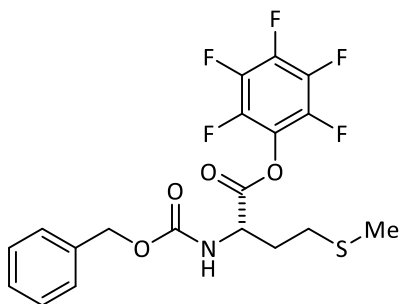

Prepared according to “Section II. General Procedure A (3.50 V)”.

**Physical characteristics:** Clear blocky crystals

**Chromatography solvent:** 5-10% ethyl acetate/hexanes

**Yield:** 198 mg (88% yield)

**ESI-HRMS:** m/z calculated for C<sub>19</sub>H<sub>17</sub>F<sub>5</sub>NO<sub>4</sub>S [M+H]<sup>+</sup> 450.0793, found 450.0796

$[\alpha]_D^{30} = -15.7 \pm 1.4$  (c=0.5) CH<sub>2</sub>Cl<sub>2</sub>

**Enantiomeric excess (determined by diastereomeric amidation)** = >99%

**<sup>1</sup>H NMR (400 MHz, CDCl<sub>3</sub>):** δ 7.62 – 7.26 (m, 5H), 5.75 (d, *J* = 8.5 Hz, 1H), 5.15 (s, 2H), 4.90 (td, *J* = 8.2, 4.6 Hz, 1H), 2.62 (tq, *J* = 11.1, 5.0 Hz, 2H), 2.31 (tt, *J* = 7.9, 4.0 Hz, 1H), 2.20-2.12 (m, 4H).

**<sup>13</sup>C NMR (100 MHz, CDCl<sub>3</sub>):** δ 168.66, 155.96, 141.02 (ddq, *J* = 251.82 Hz, 12.79 Hz, 4.02 Hz), 139.77 (dt, *J* = 254.19 Hz, 13.24 Hz, 4.02 Hz), 137.92 (dtdd, *J* = 252.73 Hz, 13.70 Hz, 5.75 Hz, 2.83 Hz), 135.96, 128.57, 128.34, 128.19, 124.70 (tdt, *J* = 14.66 Hz, 4.57 Hz, 1.94 Hz), 67.45, 53.12, 31.41, 29.80, 15.38.

**<sup>19</sup>F NMR (376 MHz, CDCl<sub>3</sub>):** δ -152.15 – -152.86 (m, 2F), -157.20 (t, *J* = 21.7 Hz, 1F), -161.60 – -162.26 (m, 2F).

**Pentafluorophenyl N<sup>2</sup>,N<sup>6</sup>-bis((benzyloxy)carbonyl)-L-lysinate (39)**

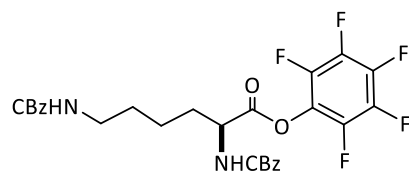

Prepared according to “Section II. General Procedure B”.

**Physical characteristics:** White powder

**Chromatography solvent:** 10-20% ethyl acetate/hexanes

**Yield:** 215 mg (74% yield)

**ESI-HRMS:** m/z calculated for C<sub>27</sub>H<sub>24</sub>F<sub>5</sub>NO<sub>5</sub>Na [M+Na]<sup>+</sup> 560.1467, found 560.1469

**[α]<sub>D</sub><sup>31</sup>** = -10.0 ± 0.2 (c=0.5) EtOAc **Enantiomeric excess (determined by amidation)** = 99%

**<sup>1</sup>H NMR (400 MHz, CD<sub>3</sub>CN):** δ 7.64 – 7.05 (m, 10H), 6.43 (d, *J* = 7.2 Hz, 1H), 5.73 (t, *J* = 6.0 Hz, 1H), 5.22 – 4.98 (m, 4H), 4.66 – 4.39 (m, 1H), 3.14 (q, *J* = 6.4 Hz, 2H), 2.07 – 1.81 (m, 2H), 1.51 (tt, *J* = 7.4, 3.7 Hz, 4H).

**<sup>13</sup>C NMR (100 MHz, CD<sub>3</sub>CN)** δ 169.95, 164.59, 161.67, 157.19, 156.70, 141.94 (ddq, *J* = 249.80 Hz, 12.70 Hz, 4.13 Hz), 140.52 (dt, *J* = 251.12 Hz, 13.31 Hz, 3.64 Hz), 138.89 (dm, *J* = 249.59 Hz), 138.31, 137.80, 136.25, 129.55, 129.39, 129.26, 129.00, 128.93, 128.71, 128.60, 125.76 (tdt, *J* = 14.77 Hz, 4.40 Hz, 2.13 Hz), 69.59, 67.48, 67.44, 54.97, 44.81, 28.87, 25.78,.

**<sup>19</sup>F NMR (376 MHz, CD<sub>3</sub>CN):** δ -154.43 (d, *J* = 17.0 Hz, 2F), -159.98 (t, *J* = 21.0 Hz, 1F), -164.27 (dd, *J* = 21.0, 17.0 Hz, 2F).

**Pentafluorophenyl (E)-N<sup>2</sup>,N<sup>6</sup>,N<sup>6'</sup>-tris((benzyloxy)carbonyl)-L-argininate (40)**

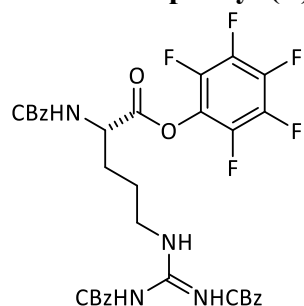

Prepared according to “Section II. General Procedure B”.

**Physical characteristics:** White powder

**Chromatography solvent:** 13-25% ethyl acetate/hexanes

**Yield:** 319 mg (86% yield); 1.203 g (81% yield)

**ESI-HRMS:** m/z calculated for C<sub>36</sub>H<sub>32</sub>F<sub>5</sub>N<sub>4</sub>O<sub>8</sub> [M+H]<sup>+</sup> 743.2135, found 743.2137

**[α]<sub>D</sub><sup>30</sup>** = +2.52 ± 0.1 (c=0.5) CH<sub>2</sub>Cl<sub>2</sub> **Enantiomeric excess (determined by amidation)** = >99%

**<sup>1</sup>H NMR (400 MHz, CD<sub>3</sub>CN):** δ 9.43 (s, 1H), 9.25 (s, 1H), 7.46 – 7.27 (m, 15H), 6.49 (d, *J* = 7.8 Hz, 1H), 5.27 (s, 2H), 5.16 – 5.08 (m, 4H), 4.63 (td, *J* = 8.2, 5.1 Hz, 1H), 4.05 (h, *J* = 7.3 Hz, 2H), 2.01 – 1.74 (m, 4H).

**<sup>13</sup>C NMR (100 MHz, CD<sub>3</sub>CN):** δ 170.16, 157.59, 157.26, 142.02 (ddq, *J* = 249.92 Hz, 12.55 Hz, 4.15 Hz), 140.60 (dt, *J* = 250.64 Hz, 13.76 Hz, 3.96 Hz), 138.97 (dm, *J* = 249.18 Hz), 138.38, 137.83, 129.41, 129.35, 128.95, 128.74, 128.70, 128.58, 125.98 – 125.57 (m), 67.41, 66.74, 55.10, 40.87, 31.23, 29.98

**<sup>19</sup>F NMR (376 MHz, CD<sub>3</sub>CN):** δ -154.22 – -154.51 (m, 2F), -159.80 (t, *J* = 21.0 Hz, 1F), -163.88 – -164.40 (m, 2F).

**Pentafluorophenyl ((benzyloxy)carbonyl)-L-phenylalaninate (41)<sup>37</sup>**

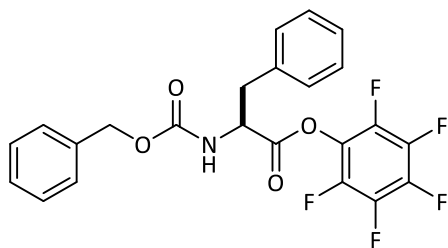

Prepared according to “Section II. General Procedure C”.

**Physical characteristics:** slightly off-white solid

**Chromatography solvent:** 2-7% ethyl acetate/hexanes

**Yield:** 165 mg (71% yield); 633 mg (68% yield); 1.06 g (65% yield)

$[\alpha]_D^{20} = -27.0 \pm 0.1$  (c=0.5) CHCl<sub>3</sub> **Enantiomeric excess (determined by amidation) = >99%**

**<sup>1</sup>H NMR (400 MHz, CDCl<sub>3</sub>):**  $\delta$  7.47 – 7.04 (m, 10H), 5.23 (d,  $J$  = 8.3 Hz, 1H), 5.13 (d,  $J$  = 2.2 Hz, 2H), 5.02 (dt,  $J$  = 8.2, 6.1 Hz, 1H), 3.34 (dd,  $J$  = 14.2, 5.9 Hz, 1H), 3.24 (dd,  $J$  = 14.2, 6.5 Hz, 1H).

**<sup>13</sup>C NMR (100 MHz, CDCl<sub>3</sub>):**  $\delta$  168.22, 155.72, 141.11 (ddq,  $J$  = 252.35 Hz, 11.98 Hz, 4.08 Hz), 139.85 (dt,  $J$  = 254.45 Hz, 13.62 Hz, 3.97 Hz), 138.00 (dtdd,  $J$  = 2.91 Hz, 5.74 Hz, 13.76 Hz, 253.17 Hz), 136.02, 134.70, 129.36, 129.02, 128.65, 128.41, 128.27, 127.70, 125.01 – 124.55, 67.45, 54.77, 37.85.

**<sup>19</sup>F NMR (376 MHz, CDCl<sub>3</sub>):**  $\delta$  -151.49 – -152.29 (m), -157.07 (t,  $J$  = 21.8 Hz), -161.56 – -161.94 (m).

**Pentafluorophenyl (S)-3-(4-(benzyloxy)phenyl)-2-((tert-butoxycarbonyl)amino)propanoate (42)**

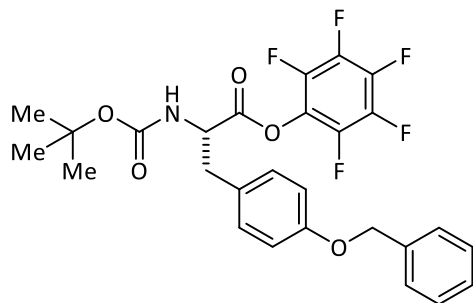

Prepared according to “Section II. General Procedure B”.

**Physical characteristics:** white solid

**Chromatography solvent:** 2-7% ethyl acetate/hexanes

**Yield:** 175 mg (65% yield)

**HRMS:** m/z calculated for C<sub>27</sub>H<sub>24</sub>F<sub>5</sub>NO<sub>5</sub>Na [M+Na]<sup>+</sup> 560.1467, found 560.1469

$[\alpha]_D^{32} = -16.5 \pm 0.8$  (c=0.5) **Enantiomeric excess (determined by amidation) = 98%**

**<sup>1</sup>H NMR (400 MHz, CDCl<sub>3</sub>):**  $\delta$  7.49 – 7.43 (m, 2H), 7.43 – 7.37 (m, 2H), 7.37 – 7.30 (m, 1H), 7.17 (d,  $J$  = 8.6 Hz, 2H), 6.97 (d,  $J$  = 8.6 Hz, 2H), 5.07 (s, 2H), 5.01 (d,  $J$  = 8.4 Hz, 1H), 4.89 (q,  $J$  = 6.9 Hz, 1H), 3.26 (dd,  $J$  = 14.2, 5.9 Hz, 1H), 3.17 (dd,  $J$  = 14.2, 6.6 Hz, 1H), 1.46 (s, 9H).

**<sup>13</sup>C NMR (100 MHz, CDCl<sub>3</sub>):**  $\delta$  168.23, 155.72, 154.96, 141.07 (ddq,  $J$  = 252.14 Hz, 12.40 Hz, 4.26 Hz), 139.77 (dt,  $J$  = 253.99 Hz, 13.42 Hz, 3.87 Hz), 137.95 (dtdd,  $J$  = 253.14 Hz, 13.86 Hz, 5.85 Hz, 3.05 Hz), 136.03, 129.81, 129.40, 128.60, 128.36, 128.23, 124.94 – 124.50 (m), 124.50, 78.64, 67.39, 54.86, 37.16, 28.85.

**<sup>19</sup>F NMR (376 MHz, CDCl<sub>3</sub>):**  $\delta$  -150.46 – -153.08 (m), -157.40 (t,  $J$  = 21.7 Hz), -160.57 – -163.37 (m).

**Pentafluorophenyl (S)-2-(((benzyloxy)carbonyl)amino)-3-(4-(tert-butoxy)phenyl)propanoate (43)**

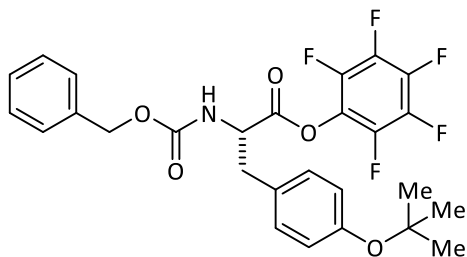

Prepared according to “Section II. General Procedure B”.

**Physical characteristics:** white solid

**Chromatography solvent:** 2-7% ethyl acetate/hexanes

**Yield:** 183 mg (68% yield)

**HRMS:** m/z calculated for C<sub>27</sub>H<sub>24</sub>F<sub>5</sub>NO<sub>5</sub>Na [M+Na]<sup>+</sup> 560.1467, found 560.1464

$[\alpha]_D^{32} = -17.4 \pm 0.9$  (c=0.5) CH<sub>2</sub>Cl<sub>2</sub> **Enantiomeric excess (determined by amidation)** = 96%

**<sup>1</sup>H NMR (400 MHz, CDCl<sub>3</sub>):** δ 7.46 – 7.21 (m, 5H), 7.12 (d, *J* = 8.1 Hz, 2H), 6.96 (d, *J* = 8.2 Hz, 2H), 5.41 (d, *J* = 8.4 Hz, 1H), 5.13 (s, 2H), 5.00 (q, *J* = 6.9 Hz, 1H), 3.28 (dd, *J* = 14.2, 6.0 Hz, 1H), 3.19 (dd, *J* = 14.2, 6.7 Hz, 1H), 1.36 (s, 9H).

**<sup>13</sup>C NMR (100 MHz, CDCl<sub>3</sub>):** δ 168.59, 158.34, 155.08, 141.16 (ddq, *J* = 252.07 Hz, 12.65 Hz, 4.28 Hz), 139.77 (dt, *J* = 253.67 Hz, 13.63 Hz, 4.10 Hz), 138.00 (dm, *J* = 252.42 Hz), 137.00, 130.48, 128.69, 128.10, 127.55, 127.20, 125.09 – 124.72 (m), 115.29, 80.68, 70.12, 54.61, 37.10, 28.32.

**<sup>19</sup>F NMR (376 MHz, CDCl<sub>3</sub>):** δ -149.96 – -153.98 (m), -157.28 (t, *J* = 21.5 Hz), -159.97 – -162.79 (m).

**pentafluorophenyl N<sup>α</sup>-(tert-butoxycarbonyl)-1-formyl-L-tryptophanate (44)**

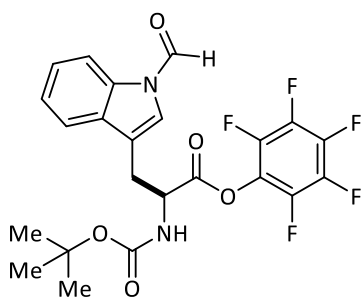

Prepared according to “Section II. General Procedure A”.

**Physical characteristics:** pale slightly brown powder

**Chromatography solvent:** 5-12% ethyl acetate/hexanes

**Yield:** 157 mg (63% yield)

**HRMS:** m/z calculated for C<sub>23</sub>H<sub>20</sub>F<sub>5</sub>N<sub>2</sub>O<sub>5</sub> [M+H]<sup>+</sup> 499.1287, found 499.1277

$[\alpha]_D^{32} = -14.4 \pm 1.1$  (c=0.5) CH<sub>2</sub>Cl<sub>2</sub>

**Enantiomeric excess (determined by amidation)** = >99%

**<sup>1</sup>H NMR (400 MHz, CD<sub>3</sub>CN):** δ 9.09 (s, 1H, another singlet can be found most likely due to different conformations), 8.45 – 7.31 (m, 5H), 6.06 (d, *J* = 8.5 Hz, 1H), 4.87 (td, *J* = 8.5, 5.4 Hz, 1H), 3.44 (dd, *J* = 15.1, 5.4 Hz, 1H), 3.32 (dd, *J* = 15.1, 8.5 Hz, 1H), 1.40 (s, 9H).

**<sup>13</sup>C NMR (100 MHz, CD<sub>3</sub>CN):** δ 169.50, 161.29, 156.35, 135.16, 142.04 (ddq, *J* = 250.16 Hz, 12.77 Hz, 4.08 Hz), 140.62 (dt, *J* = 250.70 Hz, 13.48 Hz, 4.08 Hz), 138.98 (dtdd, *J* = 249.81 Hz, 14.10 Hz, 5.14 Hz, 3.02 Hz), 131.93, 126.11, 125.98-125.63 (m), 125.78, 125.29, 124.71, 120.09, 116.54, 80.67, 54.57, 27.40.

**<sup>19</sup>F NMR (376 MHz, CD<sub>3</sub>CN):** δ -154.07 (d, *J* = 20 Hz, 2F), -159.83 (t, *J* = 20 Hz, 1F), -164.20 (t, *J* = 20 Hz, 2F).



**benzyl (S)-4-(2-((tert-butoxycarbonyl)amino)-3-oxo-3-(perfluorophenoxy)propyl)-1H-imidazole-1-carboxylate (45)**

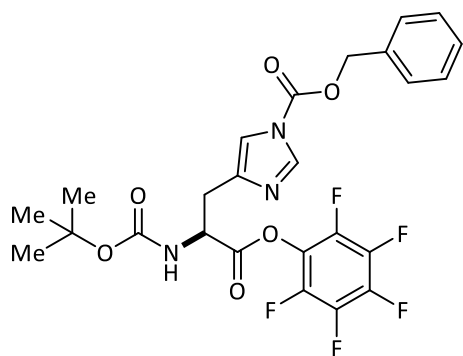

Prepared according to “Section II. General Procedure A”.  
**Chromatography solvent:** 10-25% ethyl acetate/hexanes

**NMR Yield:** 55% yield

**Low Resolution LCMS:** m/z calculated for C<sub>25</sub>H<sub>22</sub>F<sub>5</sub>N<sub>3</sub>O<sub>6</sub> [M+H]<sup>+</sup> 556.1, found 556.1

*(Spectral data are from partially purified sample)*

**<sup>1</sup>H NMR (400 MHz, CDCl<sub>3</sub>):** δ 8.21 (s, 1H), 7.68 – 7.12 (m, 6H), 5.88 (d, *J* = 8.3 Hz, 1H), 5.45 (s, 2H), 4.93 (q, *J* = 6.6 Hz, 1H), 3.31 – 3.21 (m, 2H), 1.44 (s, 9H).

**<sup>13</sup>C NMR (100 MHz, CDCl<sub>3</sub>):** δ 168.19, 155.61, 148.24, 141.17 (ddq, *J* = 254.96 Hz, 12.47 Hz, 4.10 Hz), 139.89 (dt, *J* = 253.97 Hz, 13.83 Hz, 3.53 Hz), 138.132 (dm, *J* = 253.86 Hz), 137.85, 137.52, 133.84, 129.55, 129.12, 129.03, 125.07 – 124.77, 115.53, 81.02, 77.26, 70.60, 53.62, 29.83, 28.31.

**<sup>19</sup>F NMR (376 MHz, CDCl<sub>3</sub>):** δ -151.37 – -152.75 (m), -156.74 – -157.79 (m), -161.49 – -162.29 (m).

**1-benzyl 2-(perfluorophenyl) (S)-pyrrolidine-1,2-dicarboxylate (46)<sup>38</sup>**

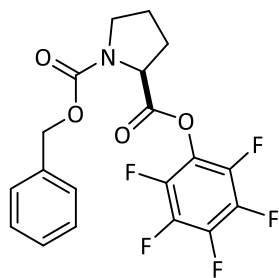

Prepared according to “Section II. General Procedure B”.

**Physical characteristics:** pale yellow liquid

**Chromatography solvent:** 5-12% ethyl acetate/hexanes

**Yield:** 137 mg (68% yield)

**[α]<sub>D</sub><sup>32</sup>** = -59.6 ± 2.3 (c=0.5) CH<sub>2</sub>Cl<sub>2</sub>

**Enantiomeric excess (determined by amidation)** = 96%

**<sup>1</sup>H NMR (400 MHz, CDCl<sub>3</sub>):** δ 7.42 – 7.24 (m, 3H), 5.29 – 5.17 (m, 1H), 5.13 (dd, *J* = 29.2, 12.4 Hz, 1H), 4.71 (ddd, *J* = 20.3, 8.8, 3.8 Hz, 1H), 3.76 – 3.50 (m, 2H), 2.43 (tt, *J* = 14.3, 9.0, 7.4 Hz, 1H), 2.32 – 2.18 (m, 1H), 2.16 – 1.95 (m, 2H).

**<sup>13</sup>C NMR (100 MHz, CDCl<sub>3</sub>):** δ 169.05, 168.86, 154.94, 154.19, 141.13 (dm, *J* = 253.80 Hz), 139.66 (dm, *J* = 253.61 Hz), 137.93 (dm, *J* = 252.02 Hz), 136.48, 136.20, 128.54, 128.49, 128.15, 128.05, 128.00, 125.22 – 124.74 (m), 67.59, 67.44, 58.96, 58.50, 47.04, 46.55, 31.28, 30.19, 24.47, 23.56.

**<sup>19</sup>F NMR (376 MHz, CDCl<sub>3</sub>):** δ -152.28 – -153.21 (m, 2F), -157.59 (dt, *J* = 130.9, 21.6 Hz, 1F), -162.11 (dtd, *J* = 88.1, 22.0, 4.8 Hz, 2F).

**1-(tert-butyl) 2-(pentafluorophenyl) indoline-1,2-dicarboxylate (47)**

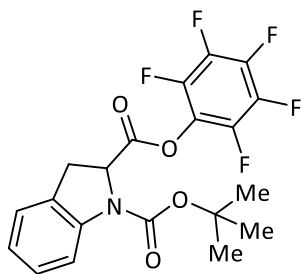

Prepared according to “Section II. General Procedure B”.

**Physical characteristics:** pale yellow powder

**Chromatography solvent:** 3-7% ethyl acetate/hexanes

**Yield:** 133 mg (61% yield)

**HRMS:** m/z calculated for  $C_{20}H_{16}F_5NO_4Na [M+Na]^+$  452.0892, found 452.0889

**$^1H$  NMR (400 MHz,  $CD_3CN$ ):**  $\delta$  7.82 (d,  $J$  = 8.1 Hz, 1H), 7.22 (t,  $J$  = 7.7 Hz, 2H), 7.00 (t,  $J$  = 7.5 Hz, 1H), 5.28 (d,  $J$  = 12.0 Hz, 1H), 3.75 (dd,  $J$  = 17.0, 12.0 Hz, 1H), 3.30 (dd,  $J$  = 17.0, 4.0 Hz, 1H), 1.59 – 1.51 (two singlets at 1.59 and 1.51 with a 1:4 ratio due to rotamers, 9H).

**$^{13}C$  NMR (100 MHz,  $CD_3CN$ ):**  $\delta$  169.46, 152.19, 142.14 (ddq,  $J$  = 249.31 Hz, 12.85 Hz, 4.01 Hz), 140.77 (dt,  $J$  = 250.86 Hz, 13.40 Hz, 4.10 Hz), 139.04 (dtdd,  $J$  = 249.77 Hz, 13.76 Hz, 5.83 Hz, 3.30 Hz), 128.93, 126.14 – 125.61 (m, overlaps with peak at 125.86), 125.86, 123.85, 115.04, 82.77, 60.81, 33.51, 28.24.

**$^{19}F$  NMR (376 MHz,  $CD_3CN$ ):**  $\delta$  -154.66 – 154.78 (mainly a doublet with  $J$  = 20.9 Hz), -159.24 – -160.19 (m, two triplets due to rotamers with a 3:1 ratio  $J$  = 20.9 Hz), -164.02 – -164.28 (m, mainly a triplet with a side peak,  $J$  = 20.9 Hz).

**Pentafluorophenyl 1-((tert-butoxycarbonyl)amino)cyclopropane-1-carboxylate (48)**

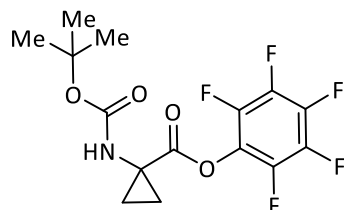

Prepared according to “Section II. General Procedure A”.

**Physical characteristics:** slightly off-white solid

**Chromatography solvent:** 2-7% ethyl acetate/hexanes

**Yield:** 105 mg (57% yield)

**HRMS:** m/z calculated for  $C_{15}H_{14}F_5NO_4Na [M+Na]^+$  390.0735, found 390.0732

**$^1H$  NMR (400 MHz,  $CDCl_3$ ):**  $\delta$  5.37 (s, 1H), 1.77 (d,  $J$  = 9.3 Hz, 2H), 1.46 – 1.40 (m, 11H).

**$^{13}C$  NMR (100 MHz,  $CDCl_3$ ):**  $\delta$  169.78, 155.74, 141.26 (ddq,  $J$  = 251.92 Hz, 12.28 Hz, 4.20 Hz), 139.64 (dt,  $J$  = 253.39 Hz, 13.23 Hz), 137.98 (dm,  $J$  = 251.50 Hz), 125.49-125.11 (m), 80.68, 34.24, 28.26, 20.36, 19.38.

**$^{19}F$  NMR (376 MHz,  $CDCl_3$ ):**  $\delta$  -152.77 (dd,  $J$  = 263.7, 21.4 Hz), -157.96 (dt,  $J$  = 100.5, 21.9 Hz), -162.39 (dt,  $J$  = 70.1, 21.5 Hz).

**Pentafluorophenyl ((benzyloxy)carbonyl)-L-phenylalanyl-L-alaninate (49)**

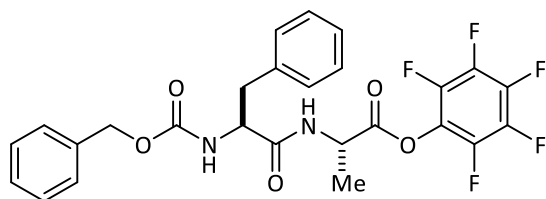

Prepared according to “Section II. General Procedure B”.

**Physical characteristics:** white powder

**Chromatography solvent:** 20-40% ethyl acetate/hexanes

**Yield:** 172 mg (64% yield)

**HRMS:**  $m/z$  calculated for  $C_{26}H_{22}F_5N_2O_5$   $[M+H]^+$  537.1443, found 537.1435

**$^1H$  NMR (400 MHz,  $CD_3CN$ ):**  $\delta$  7.35–7.25 (m, 11H), 5.93 (d,  $J$  = 8.8 Hz, 1H), 4.99 (q,  $J$  = 12.8 Hz, 2H), 4.68 (dt,  $J$  = 15.5, 7.7 Hz, 1H), 4.40 (s, 1H), 3.16 (d,  $J$  = 14.6 Hz, 1H), 2.92 – 2.72 (m, 1H), 1.54 (d,  $J$  = 7.3 Hz, 3H).

**$^{13}C$  NMR (100 MHz,  $CD_3CN$ ):**  $\delta$  172.58, 170.09, 156.90, 142.07 (dm,  $J$  = 251.21 Hz), 140.59 (dm,  $J$  = 250.89 Hz), 138.96 (dm,  $J$  = 249.60 Hz), 125.96 – 125.63 (m), 138.30, 138.02, 130.24, 129.36, 129.27, 128.79, 128.47, 127.58, 67.01, 56.85, 49.12, 38.58, 17.07.

**$^{19}F$  NMR (376 MHz,  $CD_3CN$ ):**  $\delta$  -154.69 (d,  $J$  = 20.0 Hz), -160.09 (t,  $J$  = 20.0 Hz), -164.40 (t,  $J$  = 20.0 Hz).

**Pentafluorophenyl 5-((3aS,4S,6aR)-2-oxohexahydro-1H-thieno[3,4-d]imidazol-4-yl)pentanoate (50)<sup>39</sup>**

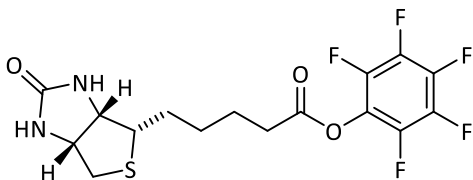

Prepared according to “Section II. General Procedure B”.

**Physical characteristics:** white powder

**Chromatography solvent:** 20-40% ethyl acetate/hexanes

**Yield:** 134 mg (65% yield)

**$^1H$  NMR (400 MHz,  $DMSO-d_6$ ):**  $\delta$  6.48 (s, 1H), 6.39 (s, 1H), 4.32 (dd,  $J$  = 7.8, 4.5 Hz, 1H), 4.16 (ddd,  $J$  = 7.8, 4.5, 1.8 Hz, 1H), 3.13 (ddd,  $J$  = 7.8, 6.2, 4.5 Hz, 1H), 2.91 – 2.56 (m, 4H), 1.79 – 1.33 (m, 6H).

**$^{13}C$  NMR (100 MHz,  $DMSO-d_6$ ):**  $\delta$  169.53, 162.78, 140.60 (ddq,  $J$  = 248.54 Hz, 12.49 Hz, 4.37 Hz), 138.94 (dt,  $J$  = 250.14 Hz, 14.01 Hz, 3.75 Hz), 137.50 (dm,  $J$  = 247.29 Hz), 124.70 – 124.33 (m), 61.07, 59.24, 55.30, 39.52, 32.33, 27.95, 27.72, 24.34.

**$^{19}F$  NMR (376 MHz,  $DMSO-d_6$ ):**  $\delta$  -153.62 (d,  $J$  = 19.1 Hz), -158.26 (t,  $J$  = 22.9 Hz), -162.74 (dd,  $J$  = 22.9, 19.1 Hz).

## X. Characterization Data for Z-Phe Derivatives

### Phenethyl ((benzyloxy)carbonyl)-L-phenylalaninate (51)

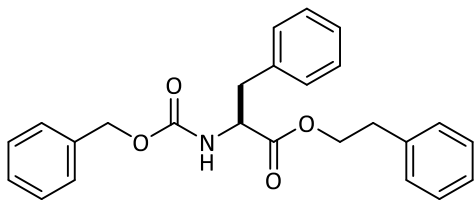

**Chromatography solvent:** 10-25% ethyl acetate/hexanes

**Physical Characteristics:** clear viscous liquid

**Yield:** 174 mg (86% yield)

**HRMS:** m/z calculated for  $C_{25}H_{25}NO_4Na$   $[M+Na]^+$  426.1676, found 426.1674

$[\alpha]_D^{20} = +13.2$  (c=1)  $CHCl_3$  **Enantiomeric excess (determined by Mosher amide) = 97%**

**$^1H$  NMR (400 MHz,  $CDCl_3$ ):**  $\delta$  7.48 – 7.34 (m, 7H), 7.34 – 7.19 (m, 6H), 7.07 (dd,  $J = 7.1, 2.8$  Hz, 2H), 5.51 – 5.26 (m, 1H), 5.21 – 5.10 (m, 2H), 4.73 (q,  $J = 7.0$  Hz), 4.38 (t,  $J = 7.0$  Hz, 2H), 3.16 (dd,  $J = 13.8, 6.1$  Hz, 1H), 3.08 (dd,  $J = 13.8, 6.1$  Hz, 1H), 2.96 (t,  $J = 7.0$  Hz, 2H).

**$^{13}C$  NMR (100 MHz,  $CDCl_3$ ):**  $\delta$  171.42, 155.65, 137.41, 136.27, 135.72, 129.25, 128.87, 128.54, 128.49, 128.46, 128.11, 128.02, 127.00, 126.69, 66.86, 65.88, 54.85, 38.05, 34.82.

### 4-ethylphenyl ((benzyloxy)carbonyl)-L-phenylalaninate (52)

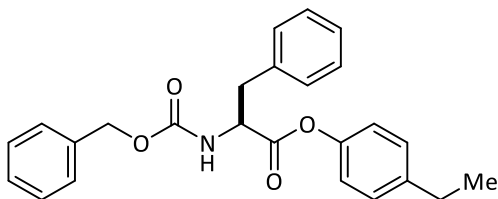

**Recrystallization solvent:** hexanes

**Physical Characteristics:** white solid with a slight phenolic smell

**Yield:** 191 mg (95% yield)

**HRMS:** m/z calculated for  $C_{25}H_{25}NO_4Na$   $[M+Na]^+$  426.1676, found 426.1675

$[\alpha]_D^{20} = +6.6$  (c=1)  $CHCl_3$

**Enantiomeric excess (determined by Mosher amide) = 99%**

**$^1H$  NMR (400 MHz,  $CDCl_3$ ):**  $\delta$  7.45 – 7.28 (m, 8H), 7.28 – 7.23 (m, 2H), 7.21 (d,  $J = 8.2$  Hz, 2H), 6.93 (d,  $J = 8.1$  Hz, 2H), 5.43 (d,  $J = 8.3$  Hz, 1H), 5.16 (d,  $J = 2.6$  Hz, 2H), 4.94 (dt,  $J = 8.3, 6.0$  Hz, 1H), 3.29 (d,  $J = 6.0$  Hz, 2H), 2.67 (q,  $J = 7.6$  Hz, 2H), 1.26 (t,  $J = 7.6$  Hz, 3H).

**$^{13}C$  NMR (100 MHz,  $CDCl_3$ ):**  $\delta$  170.45, 155.77, 148.24, 142.20, 136.26, 135.58, 129.55, 128.86, 128.80, 128.62, 128.29, 128.20, 127.39, 121.02, 67.15, 55.05, 38.34, 28.34, 15.62.

**S-phenethyl (S)-2-(((benzyloxy)carbonyl)amino)-3-phenylpropanethioate (53)**

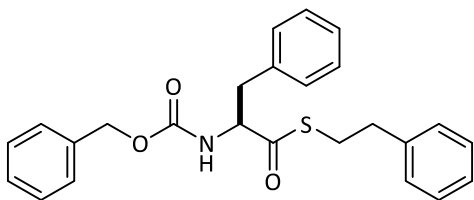

**Recrystallization solvent:** hexanes/ethyl acetate

**Physical Characteristics:** white solid with a pungent rubbery smell

**Yield:** 176 mg (84% yield)

**HRMS:** m/z calculated for  $C_{25}H_{25}NO_3SNa$   $[M+Na]^+$  442.1447, found 442.1448

$[\alpha]_D^{20} = +19.9$  (c=0.2)  $CHCl_3$

**Enantiomeric excess (determined by direct substitution with chiral amine) = 98%**

**$^1H$  NMR (400 MHz,  $CDCl_3$ ):**  $\delta$  7.42 – 7.23 (m, 11H), 7.21 (d,  $J = 7.6$  Hz, 2H), 7.13 (dd,  $J = 7.7$ , 1.8 Hz, 2H), 5.17 – 5.03 (m, 3H), 4.73 (ddd,  $J = 8.8$ , 7.1, 5.5 Hz, 1H), 3.20 – 2.91 (m, 4H), 2.85 (t,  $J = 7.7$  Hz, 2H).

**$^{13}C$  NMR (100 MHz,  $CDCl_3$ ):**  $\delta$  200.37, 155.74, 139.89, 136.21, 135.51, 129.49, 128.84, 128.73, 128.67, 128.65, 128.36, 128.22, 127.34, 126.72, 67.32, 61.59, 38.53, 35.71, 30.48.

**S-(naphthalen-2-yl) (S)-2-(((benzyloxy)carbonyl)amino)-3-phenylpropanethioate (54)**

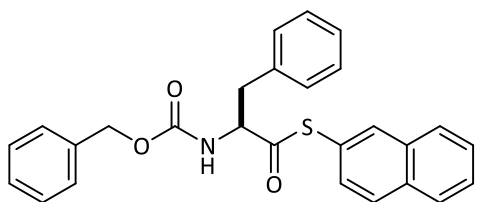

**Recrystallization solvent:** hexanes/ethyl acetate

**Physical Characteristics:** white solid with a pungent rubbery smell

**Yield:** 201 mg (91% yield)

**HRMS:** m/z calculated for  $C_{27}H_{23}NO_3SNa$   $[M+Na]^+$  464.1291, found 464.1293

$[\alpha]_D^{20} = -92.6$  (c=0.5)  $CHCl_3$

**Enantiomeric excess (determined by direct substitution with chiral amine) = 96%**

**$^1H$  NMR (400 MHz,  $CDCl_3$ ):**  $\delta$  7.94 – 7.77 (m, 4H), 7.59 – 7.49 (m, 2H), 7.42 – 7.27 (m, 9H), 7.21 (d,  $J = 6.25$ ), 5.27 (d,  $J = 8.9$  Hz, 3H), 5.16 (d,  $J = 2.3$  Hz), 4.88 (dt,  $J = 6.8$  Hz, 8.9 Hz), 3.25 – 3.15 (m, 2H).

**$^{13}C$  NMR (100 MHz,  $CDCl_3$ ):**  $\delta$  199.14, 155.80, 136.17, 135.41, 134.75, 133.69, 133.56, 130.99, 129.58, 129.04, 128.94, 128.71, 128.42, 128.26, 128.10, 127.96, 127.48, 127.39, 126.75, 124.39, 67.48, 61.55, 38.54.

**benzyl (S)-(1-(benzylamino)-1-oxo-3-phenylpropan-2-yl)carbamate (55)<sup>40</sup>**

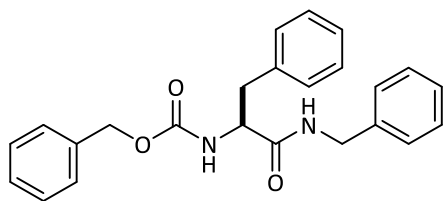

**Recrystallization solvent:** hexanes/ethyl acetate

**Physical Characteristics:** white solid

**Yield:** 191 mg (98% yield)

$[\alpha]_D^{20} = +7.6$  (c=0.877) CHCl<sub>3</sub>

**Enantiomeric excess (determined by Mosher amide) = >99%**

**<sup>1</sup>H NMR (400 MHz, CDCl<sub>3</sub>):**  $\delta$  7.59 – 6.94 (m, 15H), 6.31 (s, 1H), 5.56 (d,  $J$  = 8.4 Hz, 1H), 5.01 (d,  $J$  = 2.8 Hz, 2H), 4.61 – 4.15 (m, 3H), 3.14 (dd,  $J$  = 13.7, 6.4 Hz, 1H), 3.07 (dd,  $J$  = 13.7, 7.6 Hz, 1H).

**<sup>13</sup>C NMR (100 MHz, CDCl<sub>3</sub>):**  $\delta$  199.14, 155.80, 136.17, 135.41, 134.75, 133.69, 133.56, 130.99, 129.58, 129.04, 128.94, 128.71, 128.42, 128.26, 128.10, 127.96, 127.48, 127.39, 126.75, 124.39, 67.48, 61.55, 38.54.

**benzyl (S)-(1-(benzylamino)-1-oxo-3-phenylpropan-2-yl)carbamate (56)**

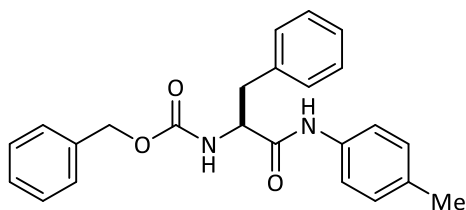

**Recrystallization solvent:** hexanes/ethyl acetate

**Physical Characteristics:** white solid

**Yield:** 179 mg (92% yield)

$[\alpha]_D^{20} = -5.8$  (c=1) CHCl<sub>3</sub>

**Enantiomeric excess (determined by Mosher amide) = >99%**

**HRMS:** m/z calculated for C<sub>24</sub>H<sub>24</sub>N<sub>2</sub>O<sub>4</sub>Na [M+Na]<sup>+</sup> 411.1679, found 411.1678

**<sup>1</sup>H NMR (400 MHz, CDCl<sub>3</sub>):**  $\delta$  8.34 (d,  $J$  = 30.1 Hz, 1H), 7.43 – 7.11 (m, 12H), 7.07 (dd,  $J$  = 8.2, 5.6 Hz, 2H), 6.02 (d,  $J$  = 8.2 Hz, 2 doublets with a 1:2 ratio, 1H), 5.10 (dd,  $J$  = 12.4, 6.0 Hz, 1H), 5.04 (dd,  $J$  = 12.4, 4.8 Hz, 1H), 4.72 (q,  $J$  = 7.8 Hz, 1H), 3.19 – 3.05 (m, 2H), 2.32 (s, two singlets with 1:2 ratio at 2.33 and 2.32 most likely due to amide conformations, 3H).

**<sup>13</sup>C NMR (100 MHz, CDCl<sub>3</sub>):**  $\delta$  169.53, 169.44, 156.42, 136.58, 136.55, 136.15, 134.83, 134.18, 129.45, 129.42, 128.73, 128.67, 128.61, 128.26, 127.94, 127.86, 127.07, 127.02, 120.36, 120.34, 67.17, 57.13, 39.16 (has a peak at 39.48 that most likely corresponds to the methyl group in a different amide conformation), 20.96.

**benzyl (S)-(1-(methoxy(methyl)amino)-1-oxo-3-phenylpropan-2-yl)carbamate (57)**

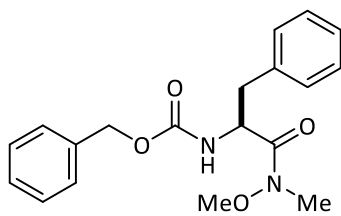

**Chromatography Solvent:** 20 – 40% hexanes/ethyl acetate

**Physical Characteristics:** clear viscous liquid

**Yield:** 164 mg (96% yield)

$[\alpha]_D^{20} = +17.1$  (c=1) CHCl<sub>3</sub>

**Enantiomeric excess (determined by Mosher amide) = 99%**

**HRMS:** m/z calculated for C<sub>19</sub>H<sub>22</sub>N<sub>2</sub>O<sub>4</sub> [M+H]<sup>+</sup> 343.1652, found 343.1652

**<sup>1</sup>H NMR (400 MHz, CDCl<sub>3</sub>):** δ 7.33 – 7.12 (m, 7H), 7.12 – 7.04 (m, 2H), 5.40 (d, *J* = 8.9 Hz, 1H), 4.99 (q, *J* = 12.3 Hz, 3H), 3.61 (s, 3H), 3.11 (s, 3H), 3.01 (dd, *J* = 13.7, 6.0 Hz, 1H), 2.84 (dd, *J* = 13.7, 7.3 Hz, 1H).

**<sup>13</sup>C NMR (100 MHz, CDCl<sub>3</sub>):** δ 172.00, 155.91, 136.46, 136.38, 129.54, 128.60, 128.53, 128.19, 128.08, 127.01, 66.90, 61.68, 52.21, 38.77, 32.19.

**methyl ((benzyloxy)carbonyl)-L-phenylalanyl-L-alaninate (58)<sup>41</sup>**

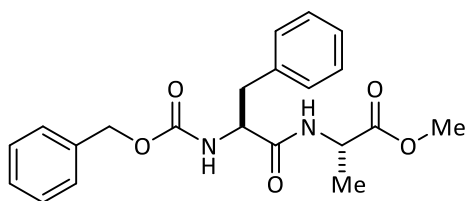

**Recrystallization solvent:** hexanes/ethyl acetate

**Physical Characteristics:** white powder

**Yield:** 177 mg (92% yield)

**Diasteriomeric ratio = >99%**

**<sup>1</sup>H NMR (400 MHz, CDCl<sub>3</sub>):** δ 7.40 – 7.23 (m, 8H), 7.20 (d, *J* = 7.3 Hz, 2H), 6.28 (d, *J* = 7.3 Hz, 1H), 5.29 (s, 1H), 5.10 (s, 2H), 4.51 (p, *J* = 7.2 Hz, 1H), 4.43 (d, *J* = 9.0 Hz, 1H), 3.72 (s, 3H), 3.13 (dd, *J* = 14.0, 6.3 Hz, 1H), 3.05 (dd, *J* = 13.8, 6.9 Hz, 1H), 1.34 (d, *J* = 7.2 Hz, 3H).

**<sup>13</sup>C NMR (100 MHz, CDCl<sub>3</sub>):** δ 172.92, 170.47, 156.02, 136.33, 136.25, 129.48, 128.81, 128.66, 128.33, 128.16, 127.19, 67.20, 56.15, 52.60, 48.27, 38.64, 18.41.

**methyl ((benzyloxy)carbonyl)-L-phenylalanyl-D-alaninate (59)<sup>42</sup>**

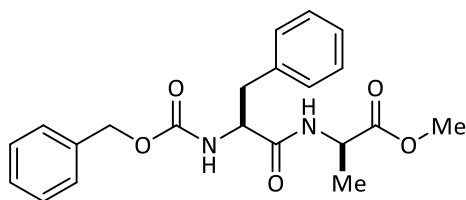

**Recrystallization solvent:** hexanes/ethyl acetate

**Physical Characteristics:** white powder

**Yield:** 177 mg (92% yield)

**Diastereomeric ratio** = >99%

**<sup>1</sup>H NMR (400 MHz, CDCl<sub>3</sub>):** δ 7.52 – 7.13 (m, 10H), 6.59 (d, *J* = 7.5 Hz, 1H), 5.73 (d, *J* = 8.3 Hz, 1H), 5.22 – 4.95 (m, 2H), 4.70 – 4.33 (m, 2H), 3.71 (s, 3H), 3.28 – 2.93 (m, 2H), 1.25 (d, *J* = 7.0 Hz, 3H).

**<sup>13</sup>C NMR (100 MHz, CDCl<sub>3</sub>):** δ 173.07, 170.50, 156.01, 136.53, 136.25, 129.39, 128.66, 128.54, 128.17, 128.01, 127.01, 67.00, 56.19, 52.48, 47.94, 38.93, 18.02.

**methyl ((benzyloxy)carbonyl)-L-phenylalanyl-L-tryptophanate (60)**

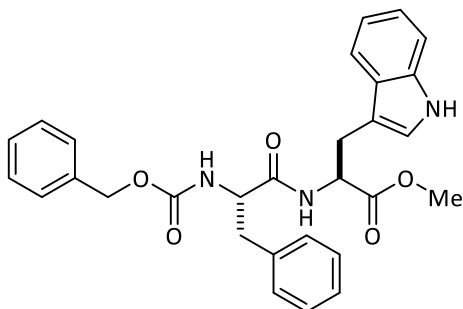

**Recrystallization solvent:** water/isopropanol

**Physical Characteristics:** beige powder

**Yield:** 175 mg (70% yield)

**Diastereomeric ratio** = 98%

**HRMS:** *m/z* calculated for C<sub>29</sub>H<sub>30</sub>N<sub>3</sub>O<sub>5</sub> [M+H]<sup>+</sup> 500.2180, found 500.2177

**<sup>1</sup>H NMR (400 MHz, CDCl<sub>3</sub>):** δ 9.16 (s, 1H), 7.50 (dd, *J* = 7.9, 1.1 Hz, 1H), 7.39 (dd, *J* = 8.1, 1.0 Hz, 1H), 7.37 – 6.91 (m, 14H), 5.85 (d, *J* = 8.6 Hz, 1H), 4.97 (q, *J* = 12.5 Hz, 2H), 4.70 (ddd, *J* = 7.6, 6.7, 5.7 Hz, 1H), 4.33 (td, *J* = 9.0, 5.0 Hz, 1H), 3.62 (s, 3H), 3.29 – 3.14 (m, 2H), 3.09 (dd, *J* = 14.1, 5.0 Hz, 1H), 2.77 (dd, *J* = 14.1, 9.4 Hz, 1H).

**<sup>13</sup>C NMR (100 MHz, CDCl<sub>3</sub>):** δ 171.97, 156.85, 130.22, 129.38, 129.25, 128.78, 128.44, 127.53, 124.77, 122.51, 120.00, 119.20, 112.34, 110.33, 66.98, 57.04, 54.06, 52.72, 38.46, 28.10.



## XI. References

1. Connelly, N. G.; Geiger, W. E. Chemical Redox Agents for Organometallic Chemistry. *Chem. Rev.* **1996**, *96*, 877–910.
2. Tshepelevitsh, S.; Kutt, A.; Lokov, M.; Kaljurand, I.; Saame, J.; Heering, A.; Plieger, P. G.; Vianello, R.; Leito, I. On the Basicity of Organic Bases in Different Media On the Basicity of Organic Bases in Different Media. *Eur. J. Org. Chem.* **2019**, *40*, 6735–6748.
3. Foley, J. K.; Korzeniewski, C.; Pons, S. Anodic and cathodic reactions in acetonitrile/tetra-*n*-butylammonium tetrafluoroborate: an electrochemical and infrared spectro-electrochemical study. *Can. J. Chem.* **1988**, *66*, 201–206.
4. Kutt, A.; Tshepelevitsh, S.; Saame, J.; Lokov, M.; Kaljurand, I.; Selberg, S.; Leito, I. Strengths of Acids in Acetonitrile. *Eur. J. Org. Chem.* **2021**, *9*, 1407–1419.
5. Emergency and Continuous Exposure Guidance Levels for Selected Submarine Contaminants. Volume 2; National Academies Press, 2008. DOI: 10.17226/12032.
6. Zoia, L.; Argyropoulos, D. S. Phenoxy radical detection using  $^{31}\text{P}$  NMR spin trapping. *Eur. J. Phys. Org. Chem.* **2009**, *22*, 1070–1077.
7. Trost B.; Belletire, J. L.; Godleski, S.; McDougal, P. G.; Balkovec, J. M. On the Use of the O-Methylmandelate Ester for Establishment of Absolute Configuration of Secondary Alcohols *J. Org. Chem.* **1986**, *51*, 2370–2374.
8. Bao, Y.-S.; Chen, C.-Y.; Huang, Z.-Z. Transesterification for Synthesis of Carboxylates Using Aldehydes as Acyl Donors via C–H and C–O Bond Activations. *J. Org. Chem.* **2012**, *77*, 18, 8344–8349
9. de Almeida, A. M.; Andersen, T. L.; Lindhardt, A. T.; de Almeida, M. V.; Skrydstrup, T. General Method for the Preparation of Active Esters by Palladium-Catalyzed Alkoxyacylation of Aryl Bromides. *J. Org. Chem.* **2015**, *80*, 3, 1920–1928
10. Bao, Y.-S.; Zhaorigetu, B.; Agula, B.; Baiyin, M.; Jia, M. Aminolysis of Aryl Ester Using Tertiary Amine as Amino Donor via C–O and C–N Bond Activations. *J. Org. Chem.* **2014**, *79*, 2, 803–808
11. J. J. Tarrío, R. Rodríguez, B. Fernández, E. Quiñoá, F. Freire, *Angew. Chem. Int. Ed.* **2022**, *61*, e202115070; *Angew. Chem.* **2022**, *134*, e202115070
12. Banovetz, H. K.; Vickerman, K. L.; David, C. M.; Alkan, M.; Stanley, L. M. Palladium-Catalyzed Intermolecular Alkene Carboacylation via Ester C–O Bond Activation. *Org. Lett.* **2021**, *23*, 9, 3507–3512
13. Zhang, H.; Xu, N.; Su, B.; Zhang, J.; Zhang, C.; Zhang, Z.; Guo, B.; Xu, S.; Wang, S.; Tang, R. Synthesis of Amides via the Amination of Aldehydes with Hydroxylamines Promoted by TBAF·3H<sub>2</sub>O. *J. Org. Chem.* **2024**, *89*, 11, 7579–7590
14. Kharbanda, S.; Weaver, J. D. Molecular Sculpting: A Multipurpose Tool for Expedited Access to Various Fluorinated Arenes via Photocatalytic Hydrodefluorination of Benzoates. *J. Org. Chem.* **2023**, *88*, 10, 6434–6444

15. Li, X.; Wang, Z.; Luo, W.; Wang, Z.; Yin, K.; Li, L. Ortho-Phosphinoarenesulfonamide-Mediated Staudinger Reduction of Aryl and Alkyl Azides. *Molecules* **2022**, *27* (17), 5707. DOI:10.3390/molecules27175707.
16. Van der Plas, S. E.; Gea, A.; Figaroli, S.; De Clercq, P. J.; Madder, A. Synthesis of a Tripodal Scaffold for Solid Phase Synthesis of Artificial Receptors. *Eur. J. Org. Chem.* **2008**, *2008* (9), 1582–1588.
17. Ueda, T.; Konishi, H.; Manabe, K. Palladium-Catalyzed Fluorocarbonylation Using *n*-Formylsaccharin as CO Source: General Access to Carboxylic Acid Derivatives. *Org. Lett.* **2013**, *15*, 20, 5370–5373.
18. Roberts, B.; Liptrot, D.; Alcaraz, L.; Luker, T.; Stocks, M. J. Molybdenum-Mediated Carbonylation of Aryl Halides with Nucleophiles Using Microwave Irradiation. *Org. Lett.*, **2010**, *12*, 19, 4280–4283.
19. Arvapalli, V. S.; Chen, G.; Kosarev, S.; Tan, M. E.; Xie, D.; Yet, L. Microwave-Assisted Organic Synthesis of 3-Substituted-Imidazo[1,5-a]Pyridines. *Tetrahedron Lett.* **2010**, *51* (2), 284–286.
20. Zubrytski, D. M.; Elek, G. Z.; Lopp, M.; Kananovich, D. G. Generation of Mixed Anhydrides via Oxidative Fragmentation of Tertiary Cyclopropanols with Phenyl iodine(III) Dicarboxylates. *Molecules* **2020**, *26* (1), 140.
21. Yuan, P.; Huang, X.; Long, L.; Huang, T.; Sun, C.; Yu, W.; Wu, L.; Chen, H.; Liu, Q. Regioselective Dearomative Amidoximation of Nonactivated Arenes Enabled by Photohomolytic Cleavage of *n*-nitrosamides. *Angew. Chem. Int. Ed.* **2024**, *63* (8).
22. Watson, A. J.; Maxwell, A. C.; Williams, J. M. Ruthenium-Catalyzed Oxidation of Alcohols into Amides. *Org. Lett.* **2009**, *11* (12), 2667–2670.
23. Hie, L.; Baker, E. L.; Anthony, S. M.; Desrosiers, J.; Senanayake, C.; Garg, N. K. Nickel-catalyzed Esterification of Aliphatic Amides. *Angew. Chem.* **2016**, *128* (48), 15353–15356.
24. Chiang, P.-C.; Kim, Y.; Bode, J. W. Catalytic Amide Formation with A'-Hydroxyenones as Acylating Reagents. *Chem. Commun.* **2009**, *30*, 4566.
25. Li, H.; Hou, Y.; Liu, C.; Lai, Z.; Ning, L.; Szostak, R.; Szostak, M.; An, J. Pentafluorophenyl Esters: Highly Chemoselective Ketyl Precursors for the Synthesis of  $\alpha,\alpha$ -Dideuterio Alcohols Using SMI<sub>2</sub> and D<sub>2</sub>O as a Deuterium Source. *Org. Lett.* **2020**, *22* (4), 1249–1253.
26. Op de Beeck, M.; Madder, A. Unprecedented C-Selective Interstrand Cross-Linking through *in Situ* Oxidation of Furan-Modified Oligodeoxynucleotides. *J. Am. Chem. Soc.* **2010**, *133* (4), 796–807.
27. Specklin, S.; Cossy, J. Chemoselective Synthesis of  $\beta$ -Ketophosphonates Using Lithiated  $\alpha$ -(Trimethylsilyl)methylphosphonate. *J. Org. Chem.* **2015**, *80* (6), 3302–3308.
28. Zhang, M.; Vedantham, P.; Flynn, D. L.; Hanson, P. R. High-Load, Soluble Oligomeric Carbodiimide: Synthesis and Application in Coupling Reactions. *J. Org. Chem.* **2004**, *69* (24), 8340–8344.
29. Gordon, E. M.; Duncton, M. A. J.; Freund, J. Derivatives of Relebactam and uses thereof. *US2020102307A1*, April, 7, 2020.
30. Chipman, S. D.; Demattei, J.; Kiwan, R.; Kachura, M. A. Alkyl Chain Modified Imidazoquinoline TLR7/8 Agonist Compounds and uses thereof. *US2019062329A1*, February, 28, 2019.

- 
31. Xue, W.; Oestreich, M. Copper-catalyzed Decarboxylative Radical Silylation of Redox-active Aliphatic Carboxylic Acid Derivatives. *Angew. Chem. Int. Ed.* **2017**, *56* (38), 11649–11652.
  32. Caldwell, N.; Jamieson, C.; Simpson, I.; Watson, A. J. Catalytic Amidation of Unactivated Ester Derivatives Mediated by Trifluoroethanol. *Chem. Commun.* **2015**, *51* (46), 9495–9498.
  33. Shaye, N. A.; Benoit, D. M.; Chavda, S.; Coulbeck, E.; Dingjan, M.; Eames, J.; Yohannes, Y. Resolution of Pentafluorophenyl 2-Phenylpropanoate Using Combinations of Quasi-Enantiomeric Oxazolidin-2-Ones. *Tetrahedron: Asymmetry* **2011**, *22* (4), 413–438.
  34. Fatemi, S.; Gernigon, N.; Hall, D. G. A Multigram-Scale Lower e-Factor Procedure for MIBA-Catalyzed Direct Amidation and Its Application to the Coupling of Alpha and Beta Aminoacids. *Green Chem.* **2015**, *17* (7), 4016–4028.
  35. Ohshima, T.; Hayashi, Y.; Agura, K.; Fujii, Y.; Yoshiyama, A.; Mashima, K. Sodium Methoxide: A Simple but Highly Efficient Catalyst for the Direct Amidation of Esters. *Chem. Commun.* **2012**, *48* (44), 5434.
  36. Fraczyk, J.; Kaminski, Z. J.; Katarzynska, J.; Kolesinska, B. 4-(4,6-dimethoxy-1,3,5-triazin-2-yl)-4-methylmorpholinium Toluene-4-sulfonate (DMT/MM/TSO-) Universal Coupling Reagent for Synthesis in Solution. *Helv. Chim. Acta* **2017**, *101* (1).
  37. Bernardes G.; Couturier, L.; Becher, J.; Gil de Montes, R. E. Quinone Protected Forms and Conjugates. *WO2023227757A1*, November, 30, 2023
  38. Andrus, M. B.; Li, W.; Keyes, R. F. Synthesis of Microcolin B, a Potent New Immunosuppressant Using an Efficient Mixed Imide Formation Reaction. *J. Org. Chem.* **1997**, *62* (16), 5542–5549.
  39. Vallinayagam, R.; Weber, J.; Neier, R. Novel Bioconjugates of Aminolevulinic Acid with Vitamins. *Org. Lett.* **2008**, *10* (20), 4453–4455. DOI:10.1021/ol801496j.
  40. Saito, Y.; Ouchi, H.; Takahata, H. Carboxamidation of Carboxylic Acids with 1-Tert-Butoxy-2-Tert-Butoxycarbonyl-1,2-Dihydroisoquinoline (BBDI) without Bases. *Tetrahedron* **2008**, *64* (49), 11129–11135. DOI:10.1016/j.tet.2008.09.094.
  41. Khattab, S. N. Ethyl 2-Cyano-2-(Hydroxyimino)Acetate (Oxyma): An Efficient and Convenient Additive Used with Tetramethylfluoroformamidinium Hexafluorophosphate (TFFH) to Replace 1-Hydroxybenzotriazole (Hobt) and 1-Hydroxy-7-Azabenzotriazole (HOAT) during Peptide Synthesis. *Bull. Chem. Soc. Jpn.* **2010**, *83* (11), 1374–1379. DOI:10.1246/bcsj.20100075.
  42. Kamiński, Z. J.; Kolesińska, B.; Kamińska, J. E.; Góra, J. A Novel Generation of Coupling Reagents. Enantiodifferentiating Coupling Reagents Prepared in Situ from 2-Chloro-4,6-Dimethoxy-1,3,5-Triazine (CDMT) and Chiral Tertiary Amines. *J. Org. Chem.* **2001**, *66* (19), 6276–6281.

## XII. NMR Spectra for Substrate Scope Entries

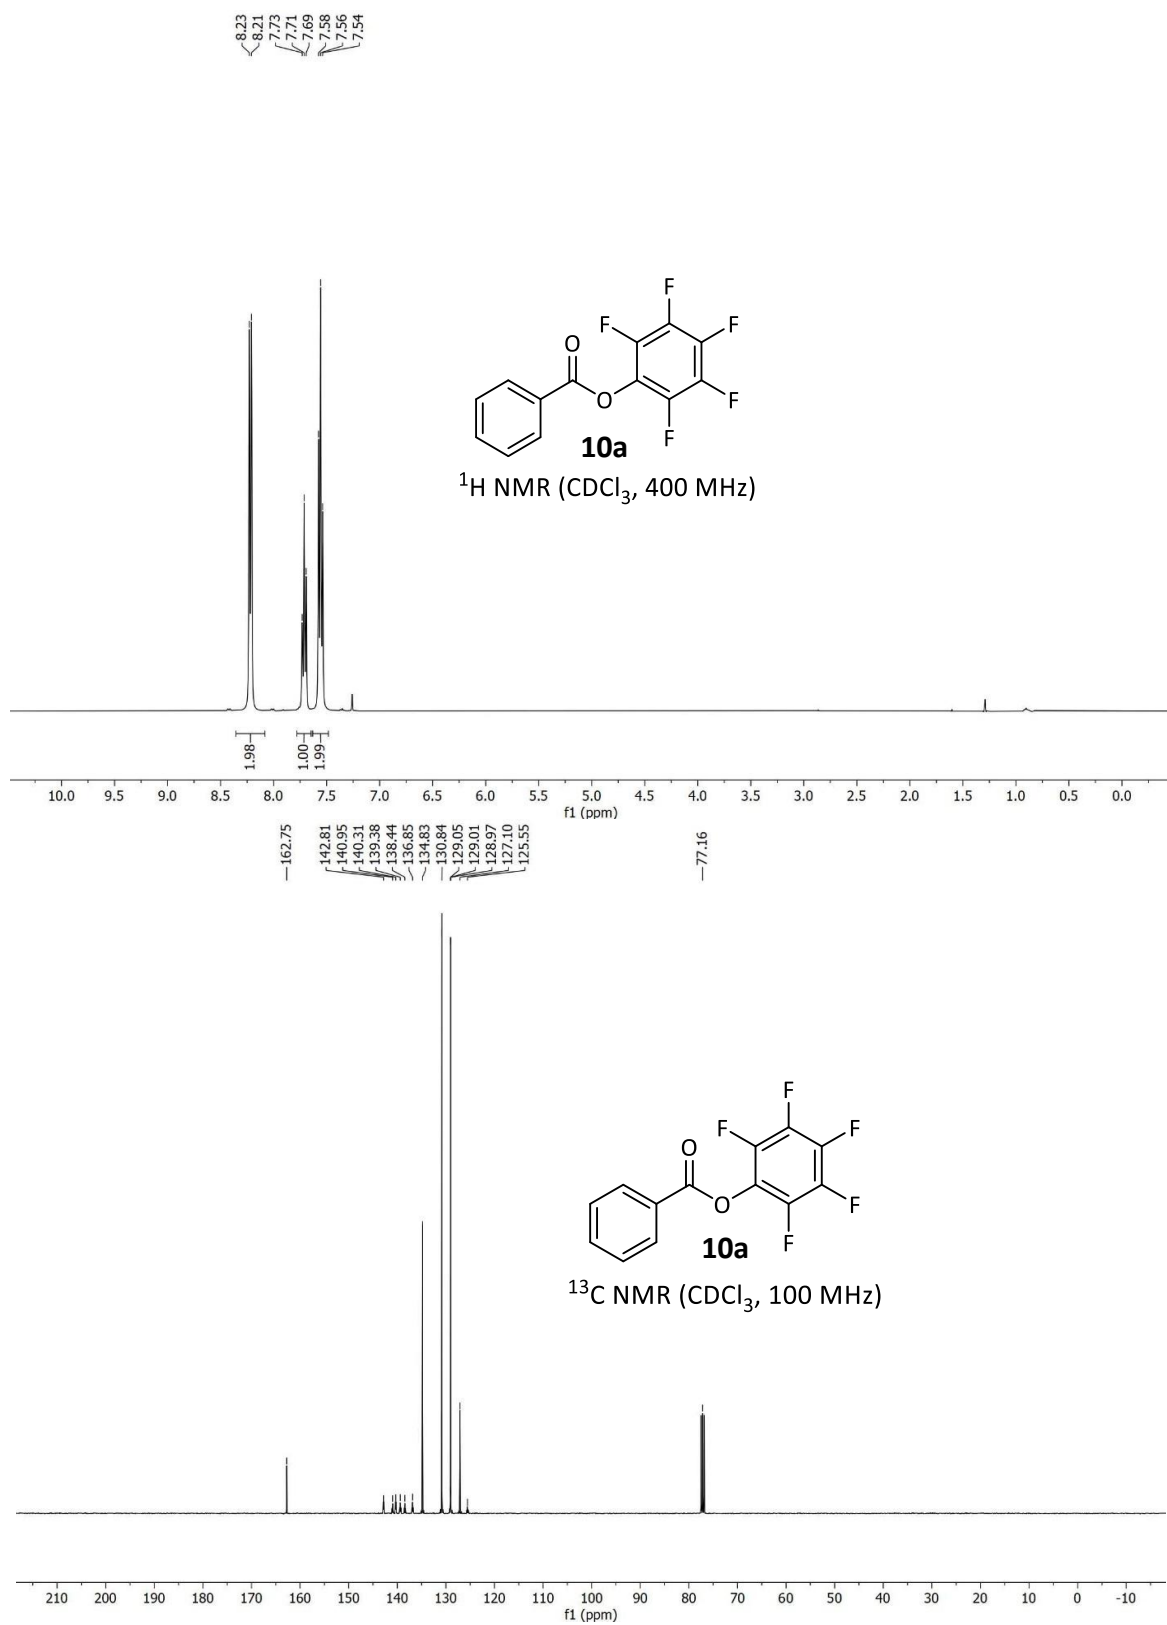

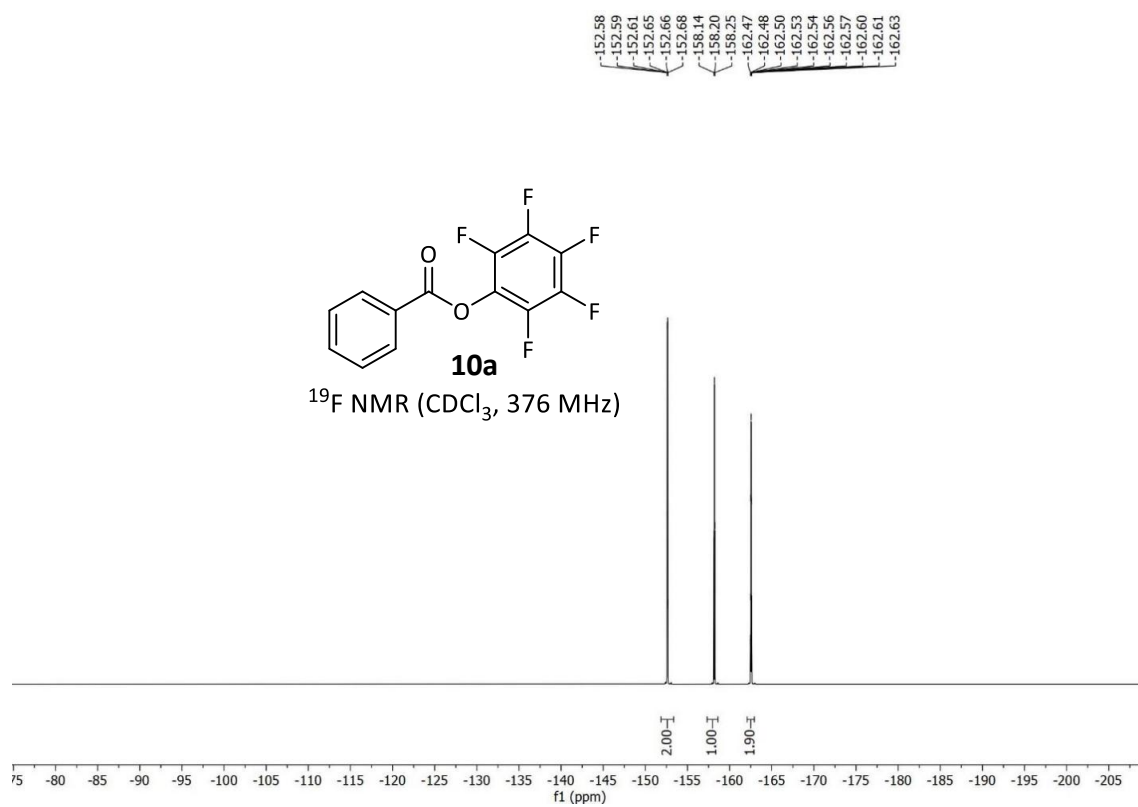

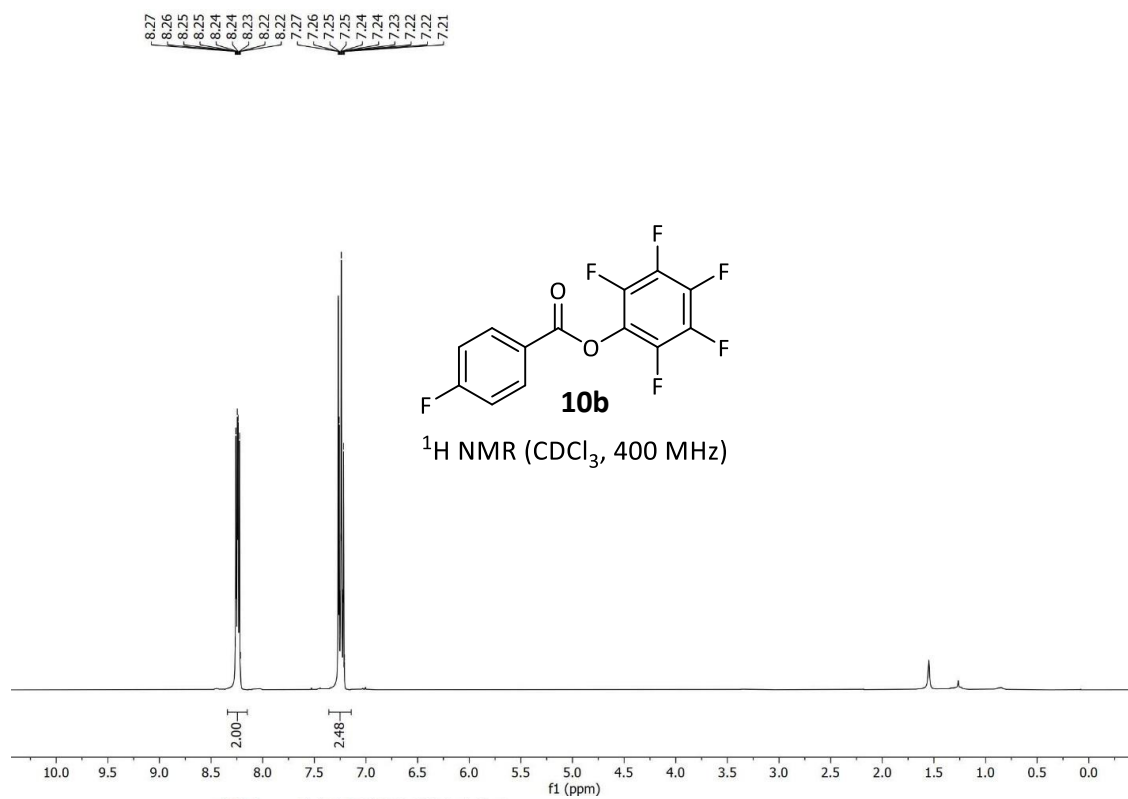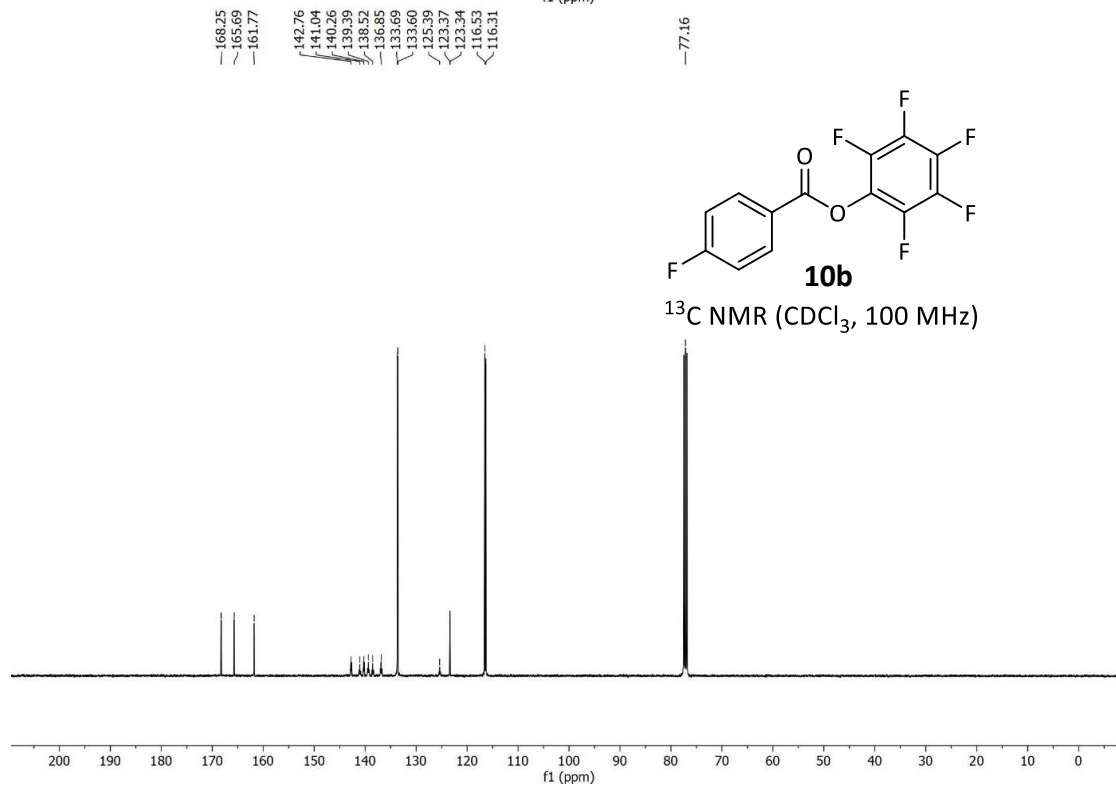

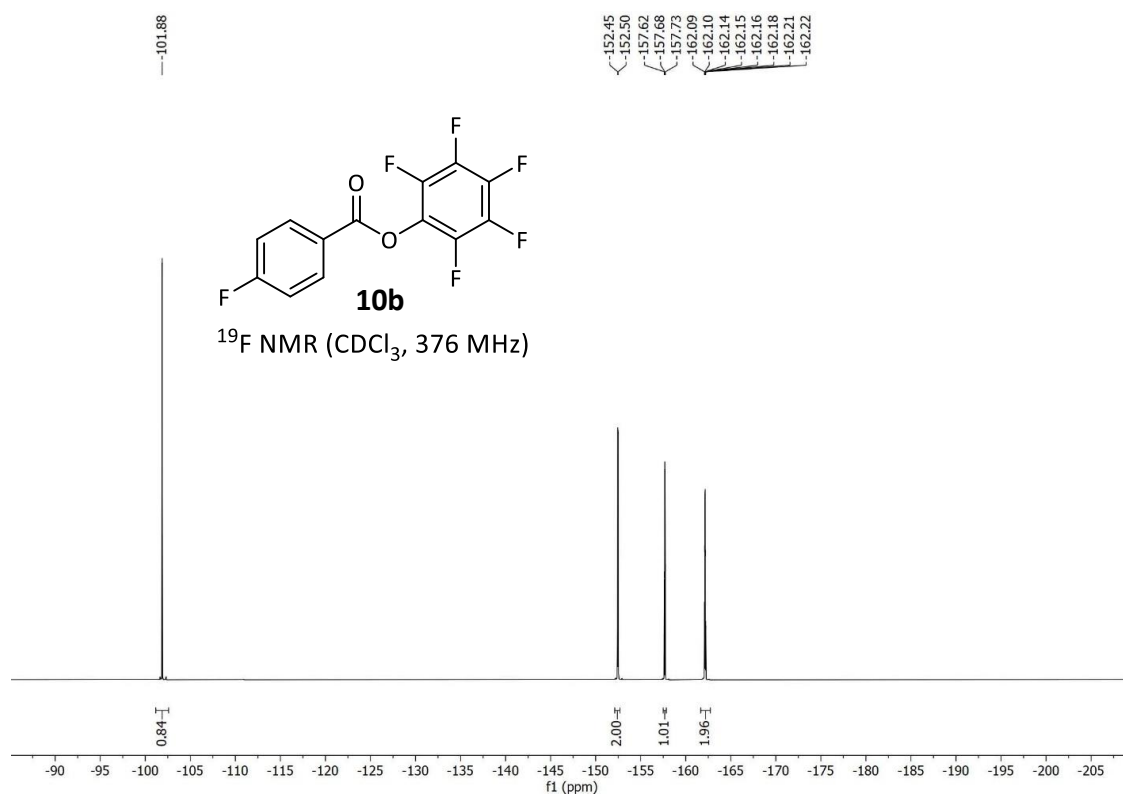

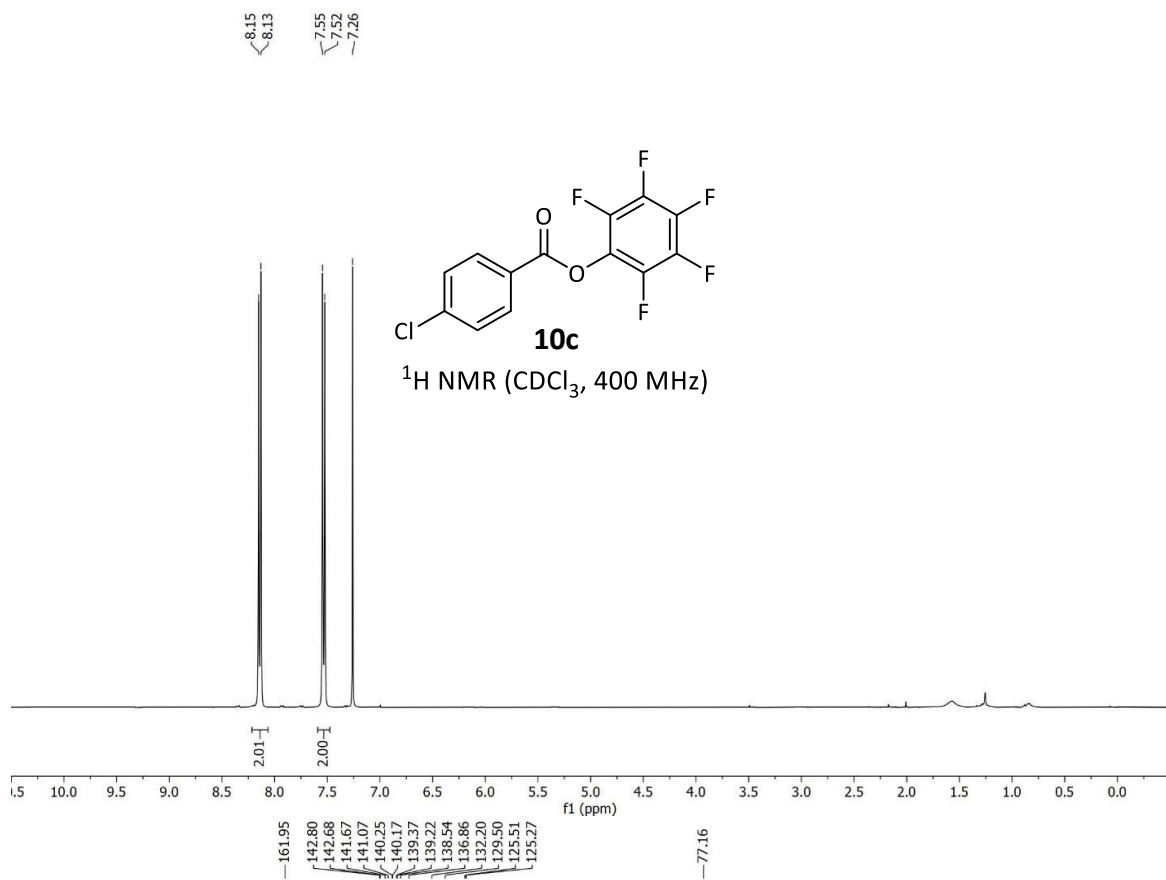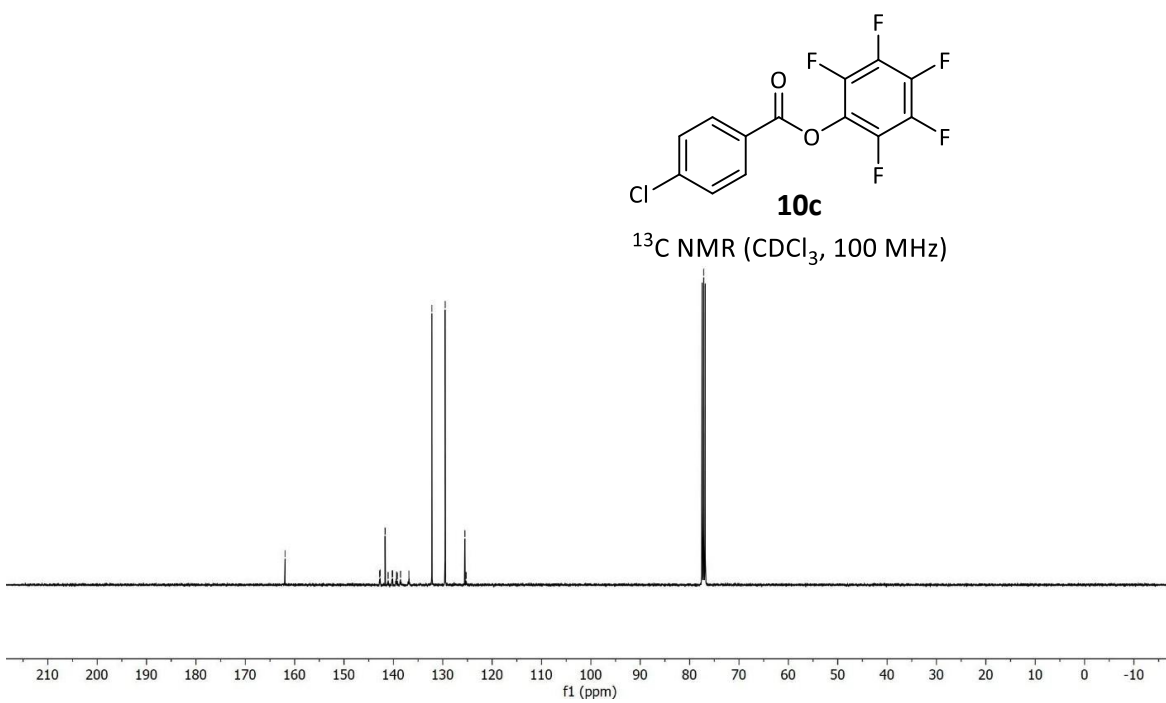



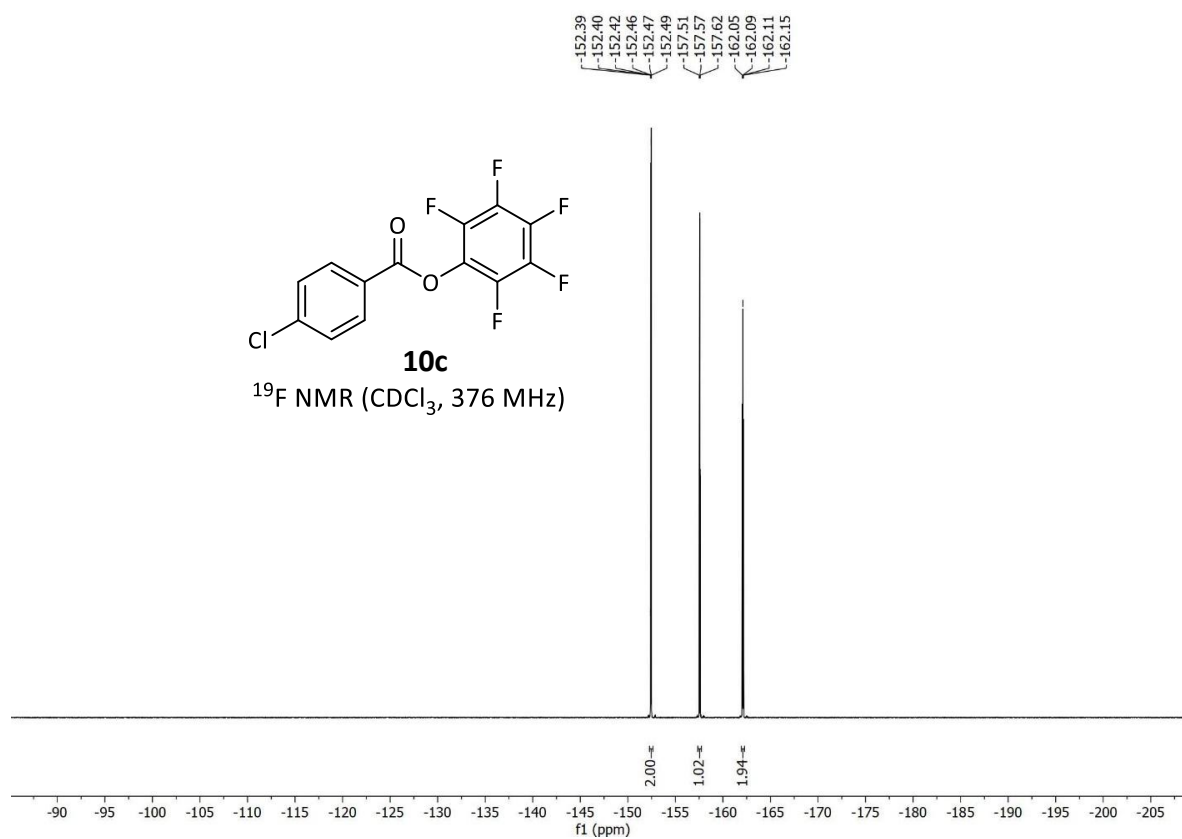

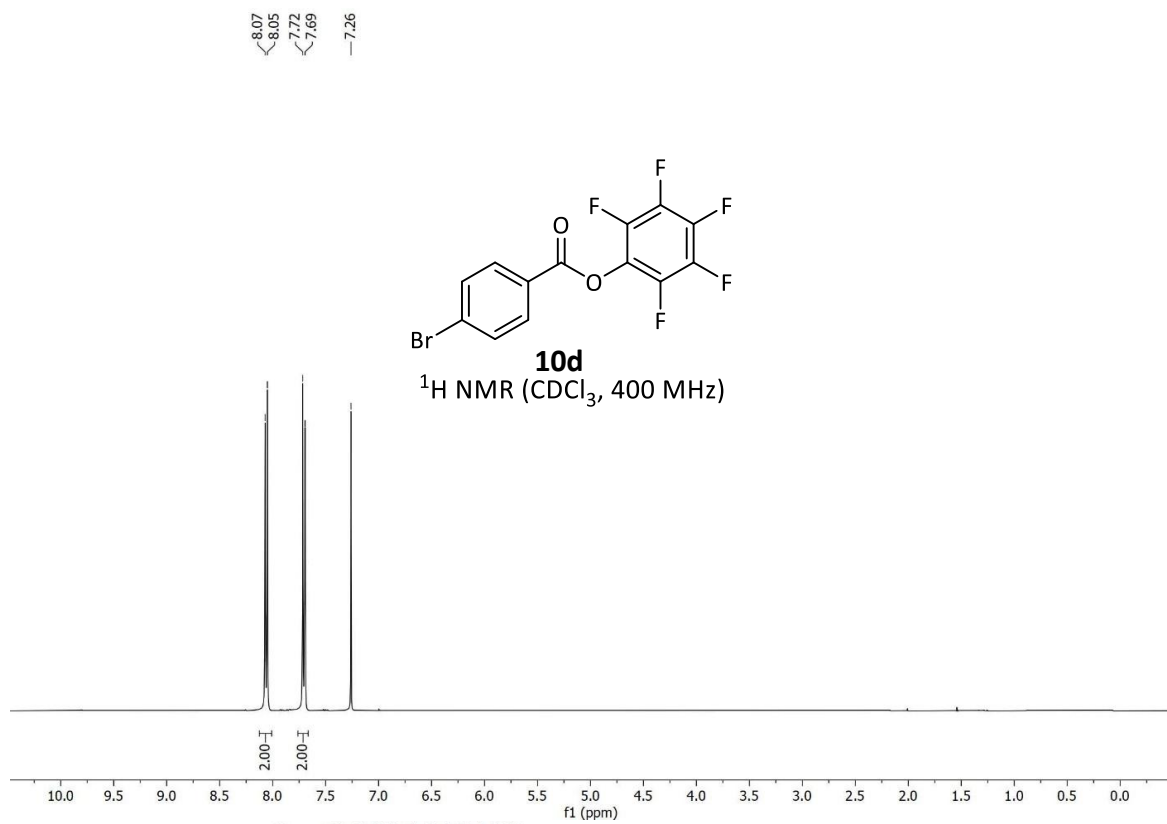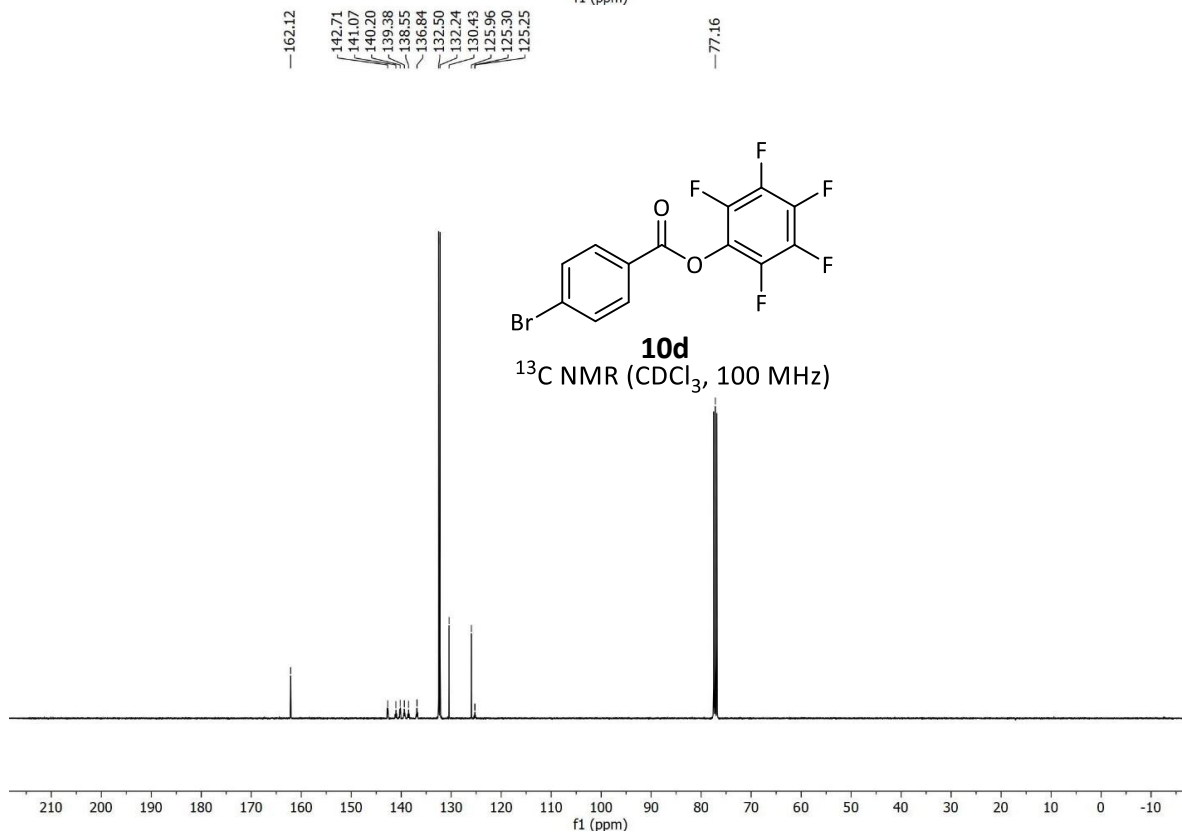

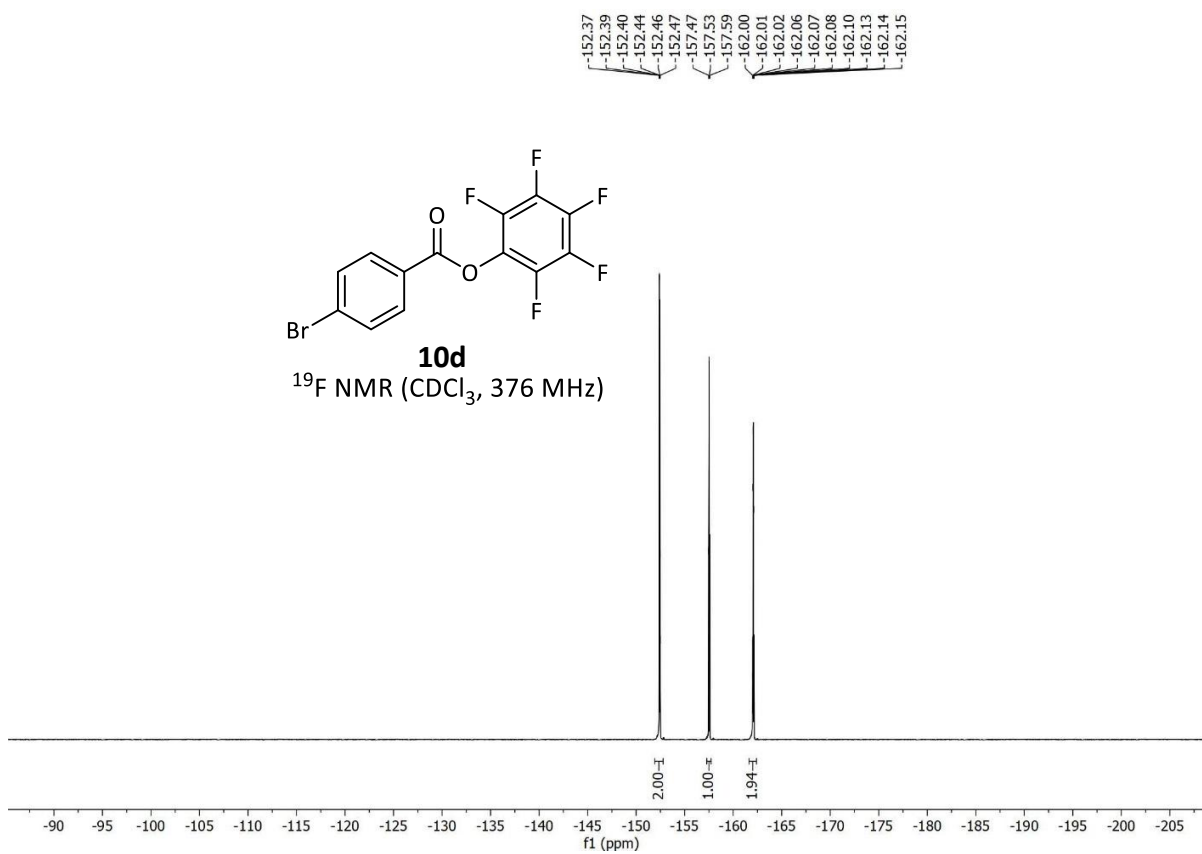

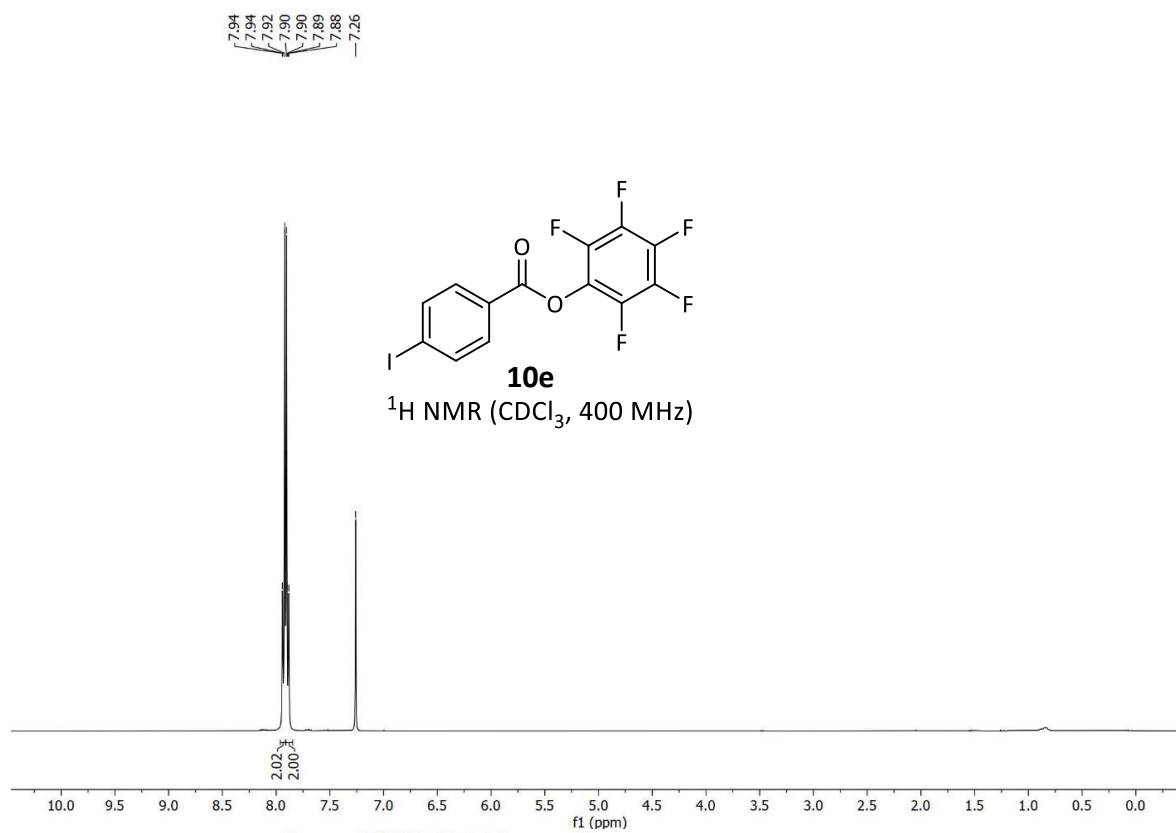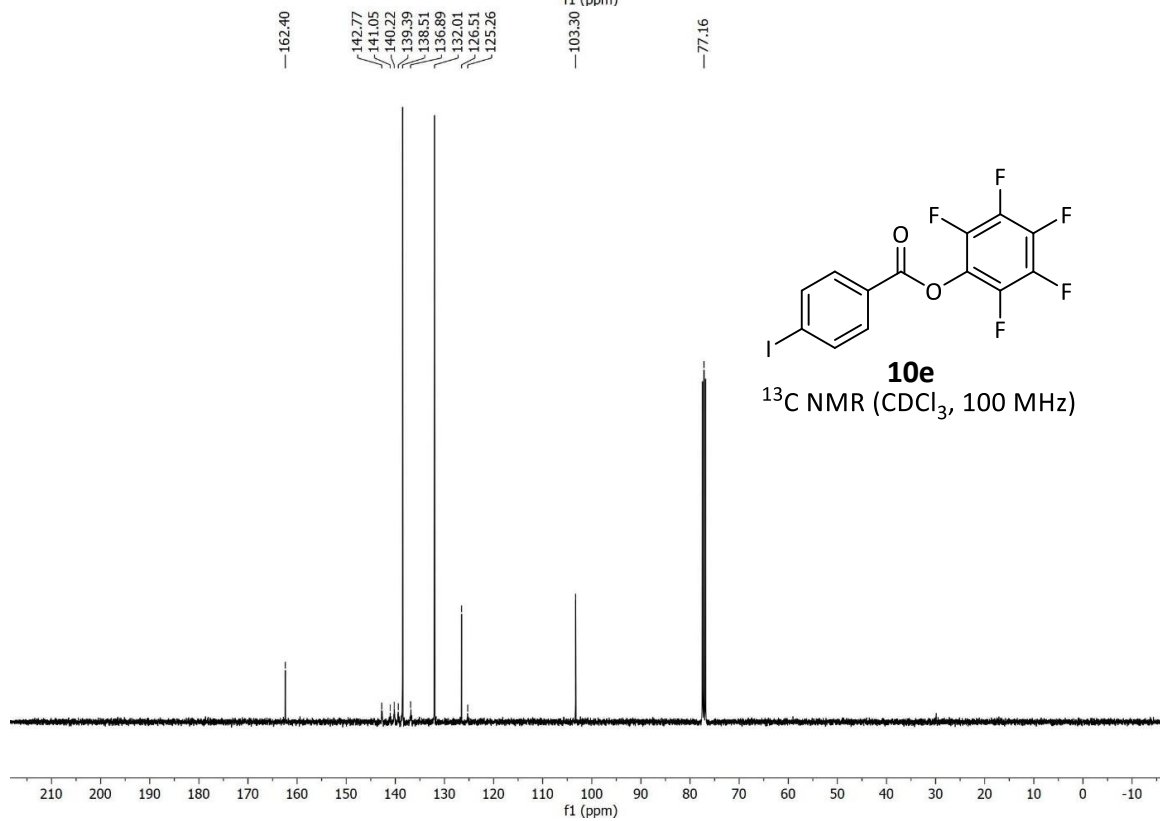

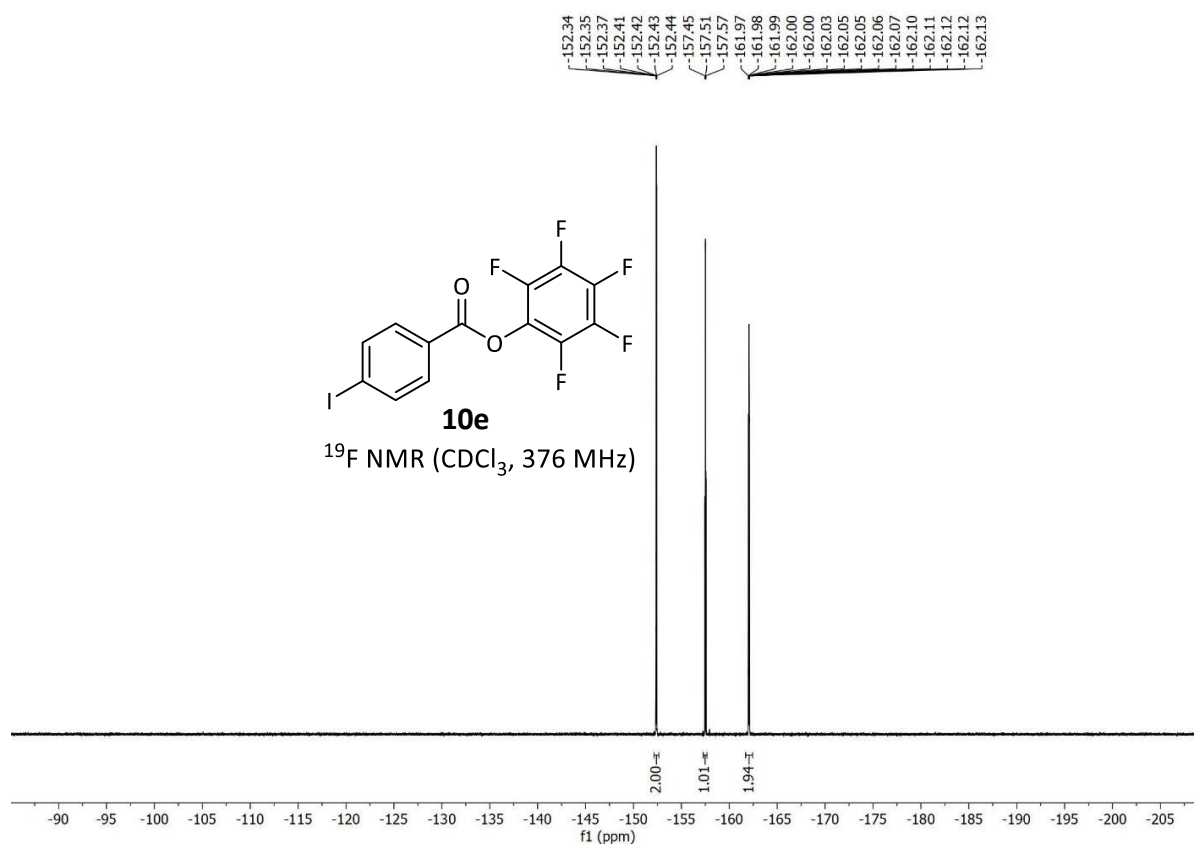

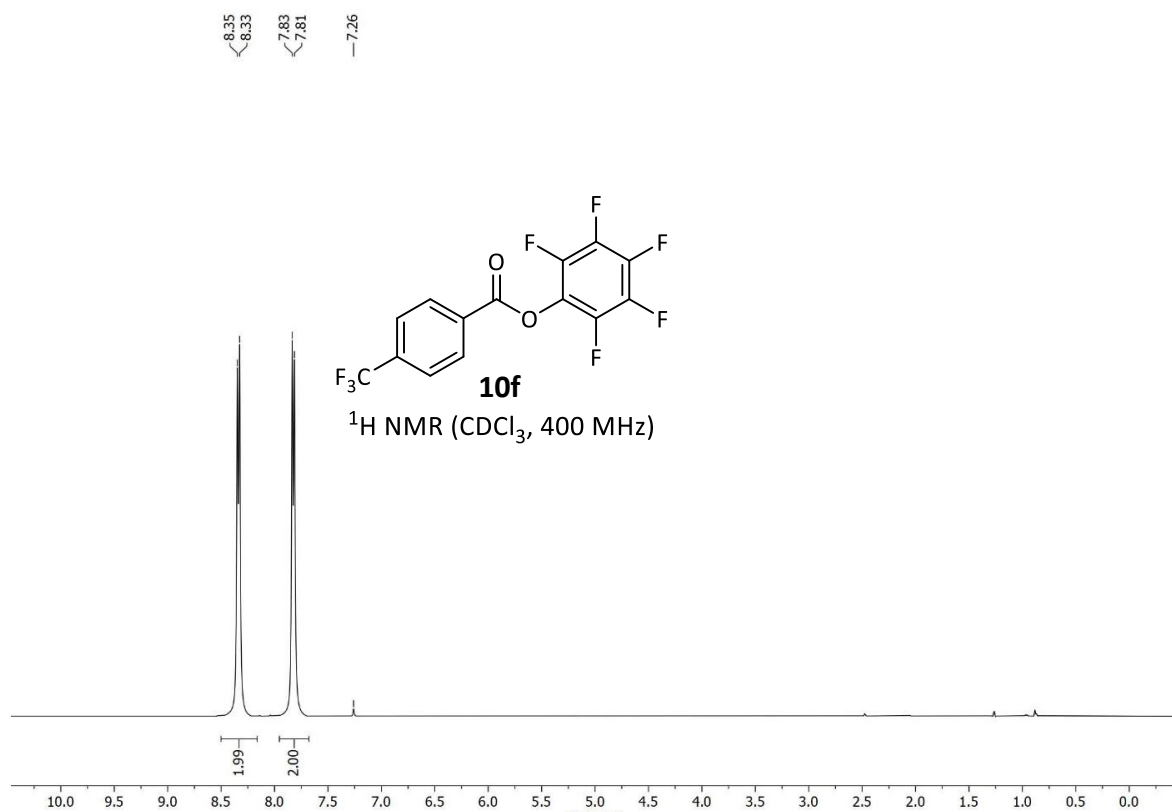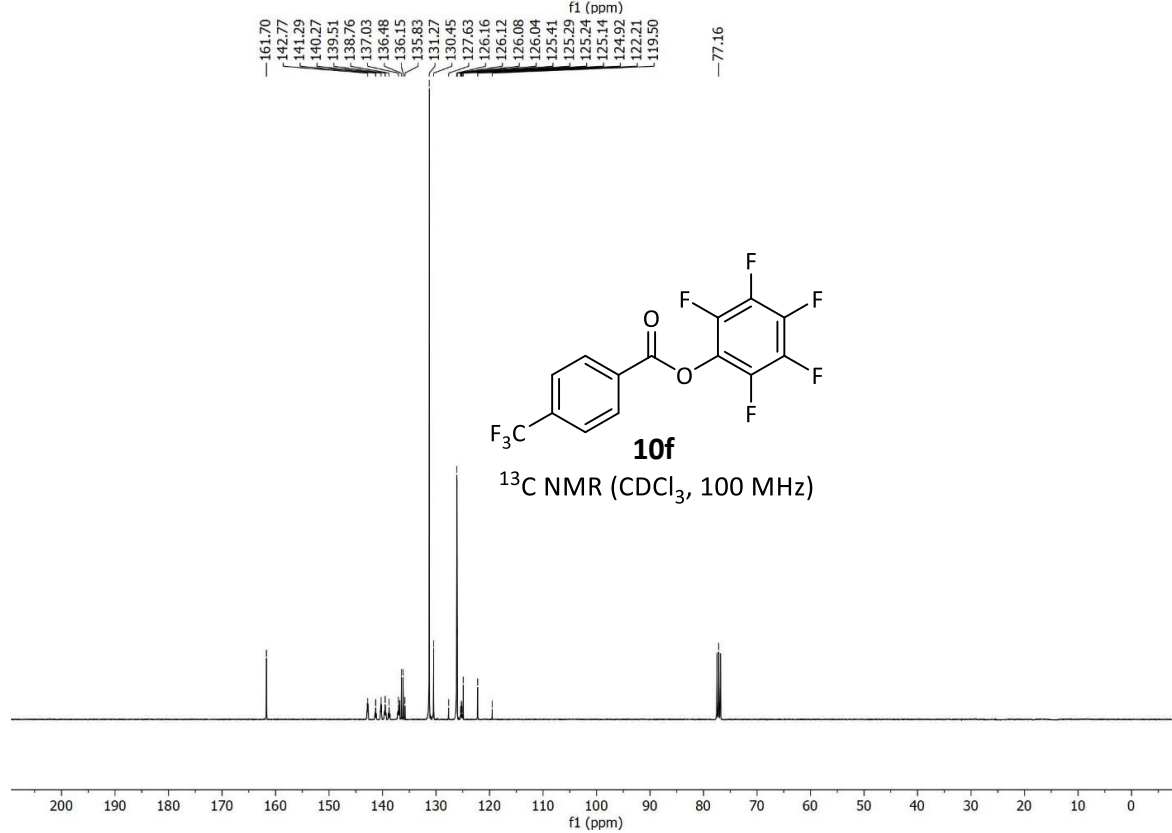

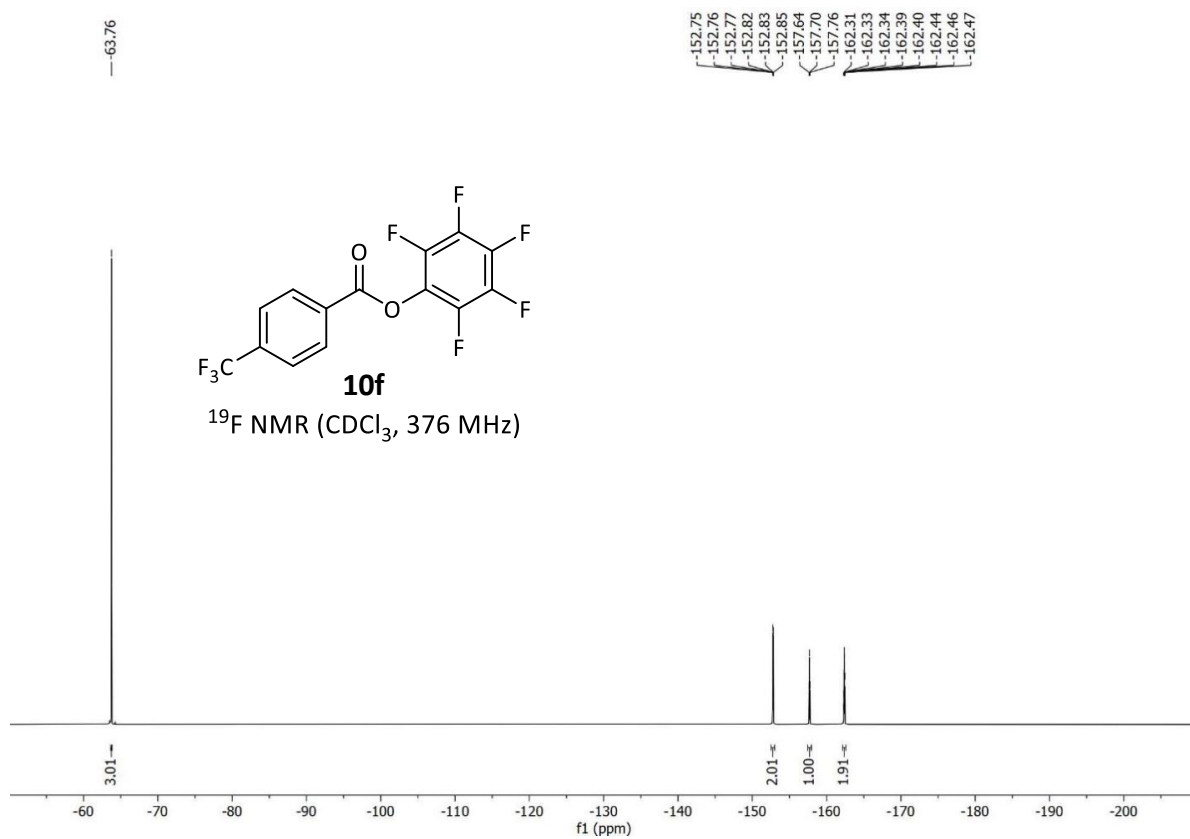

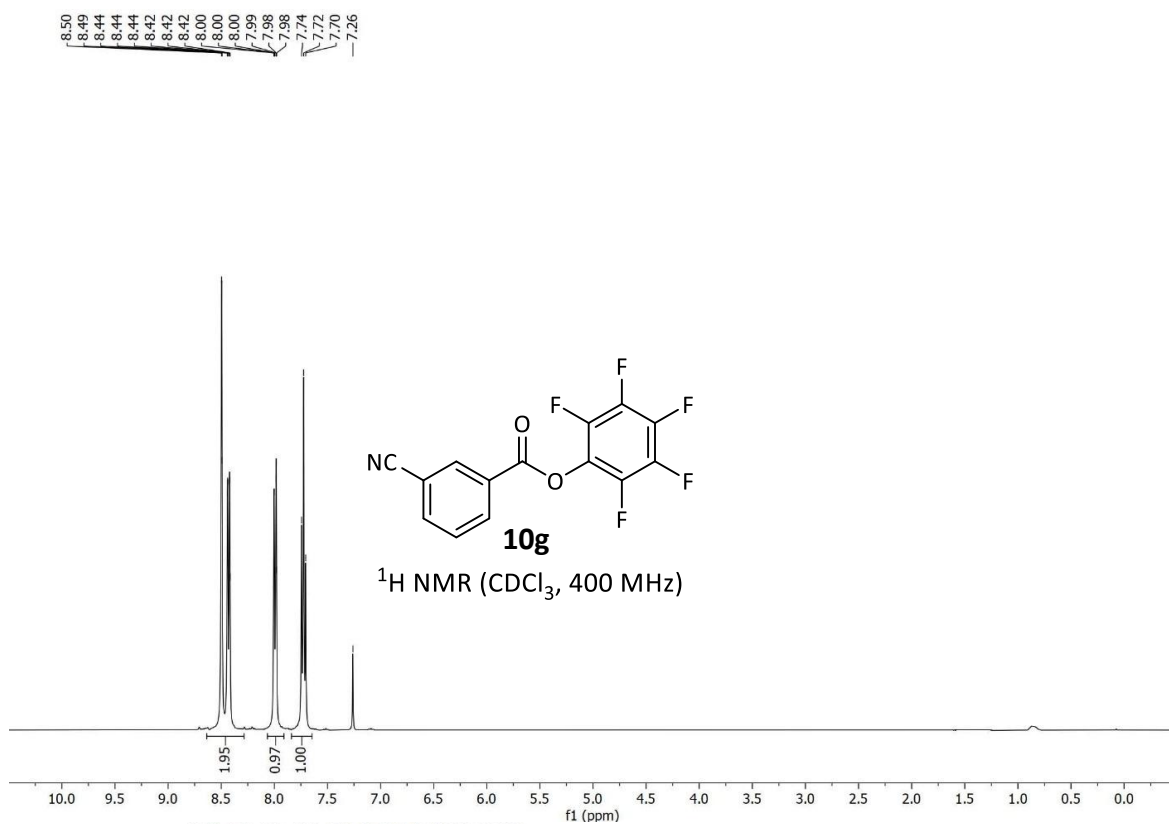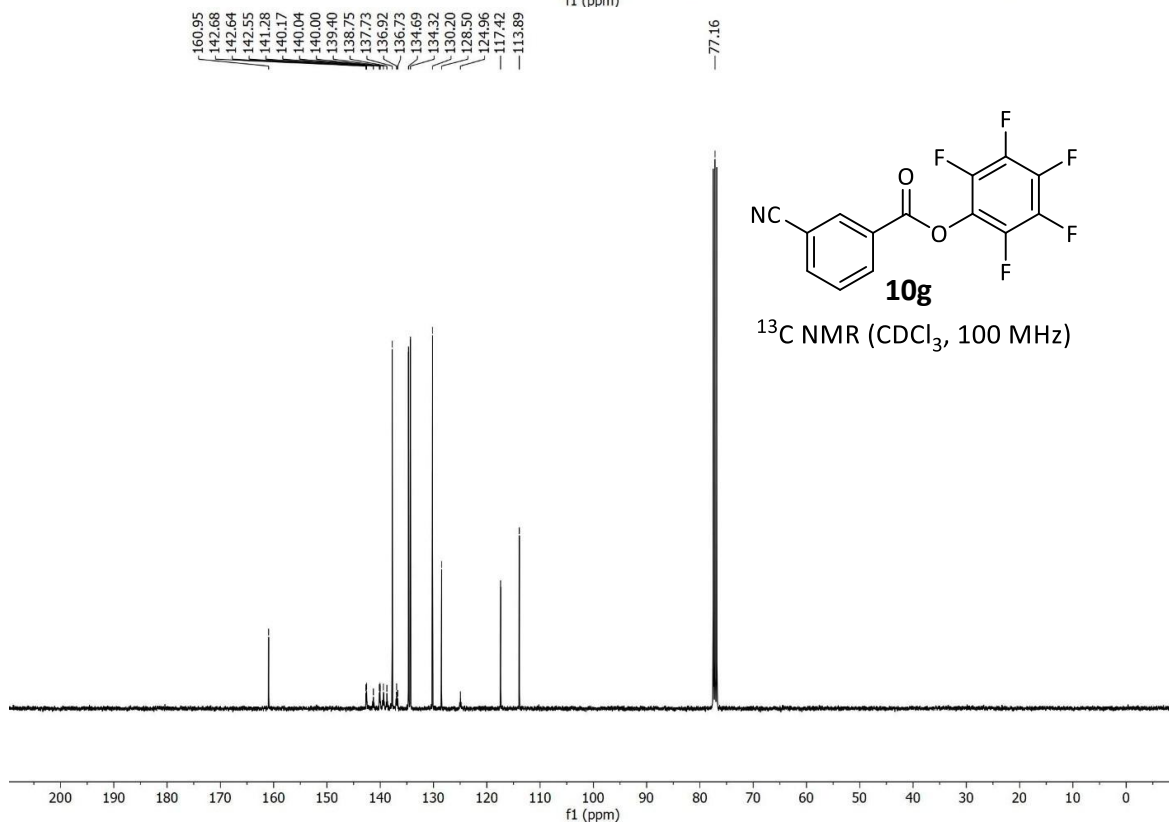



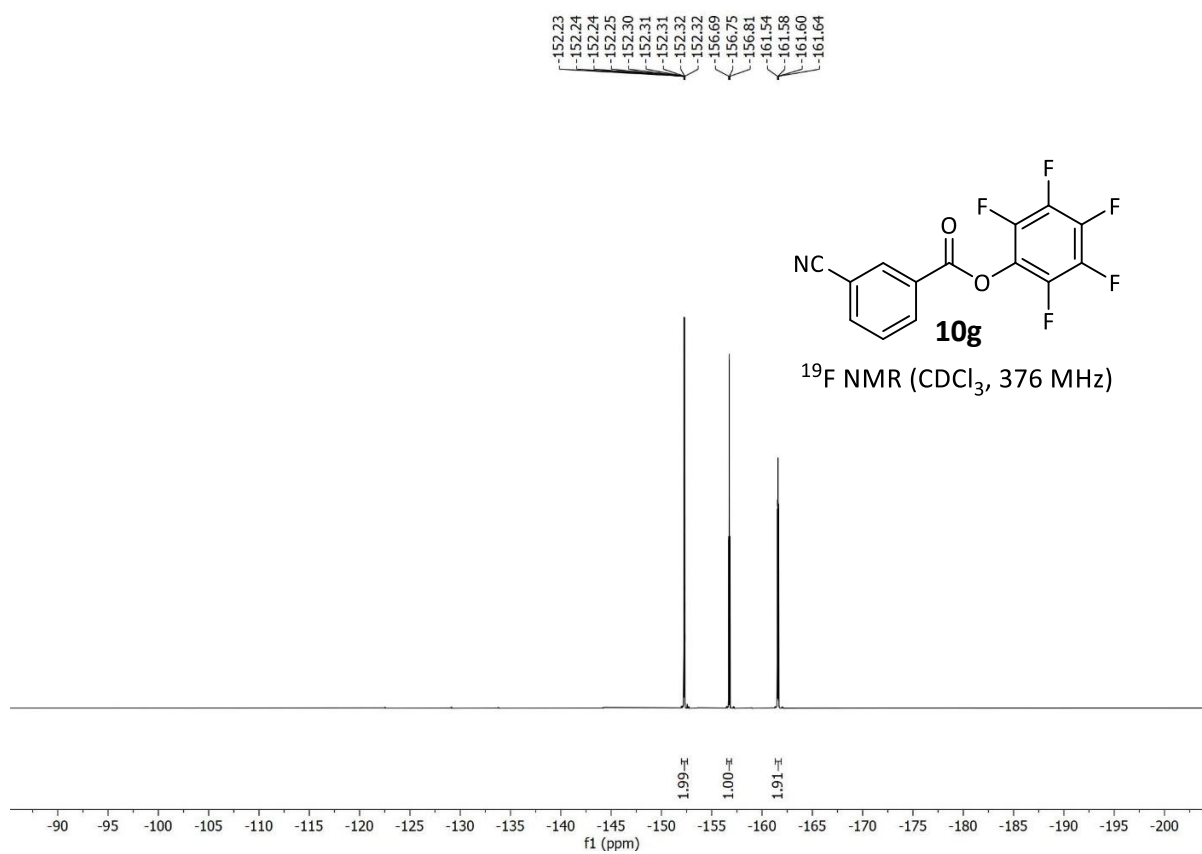

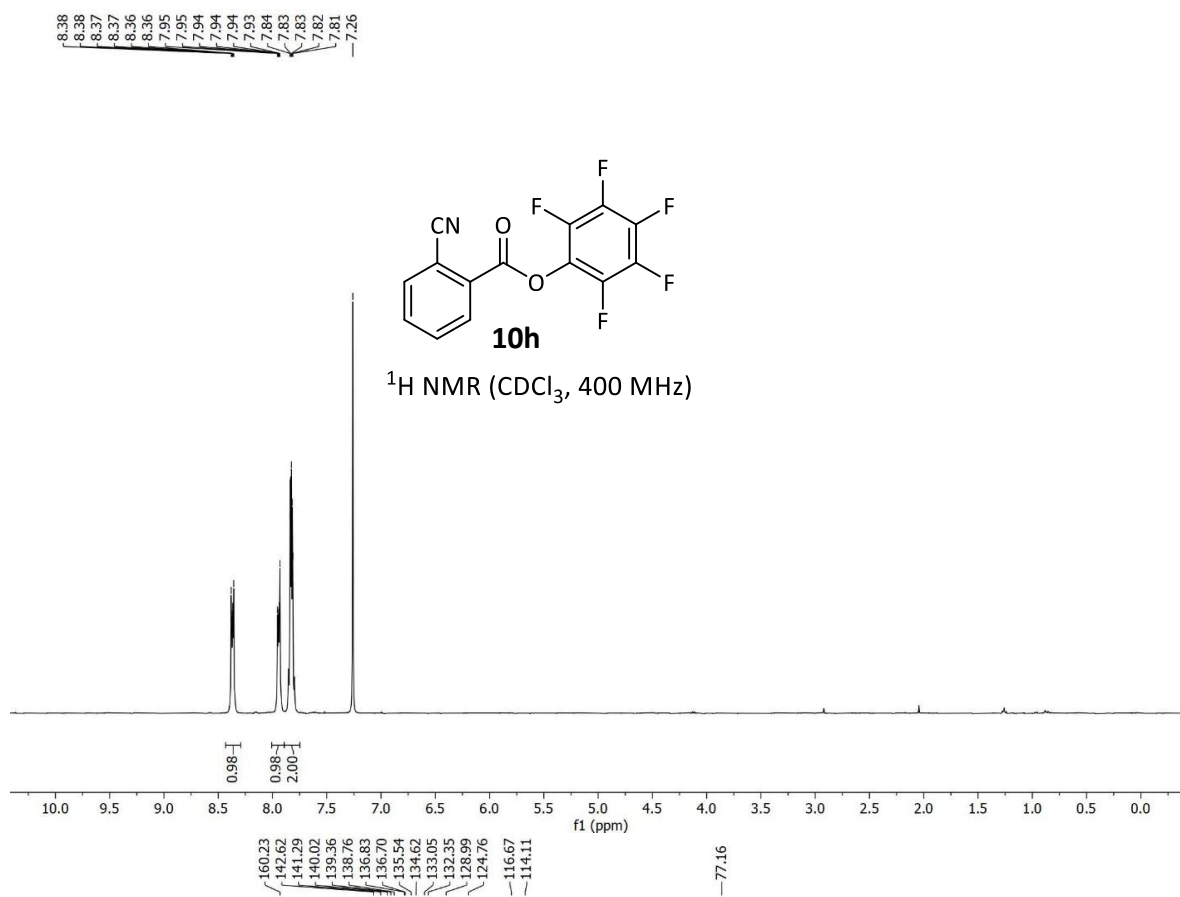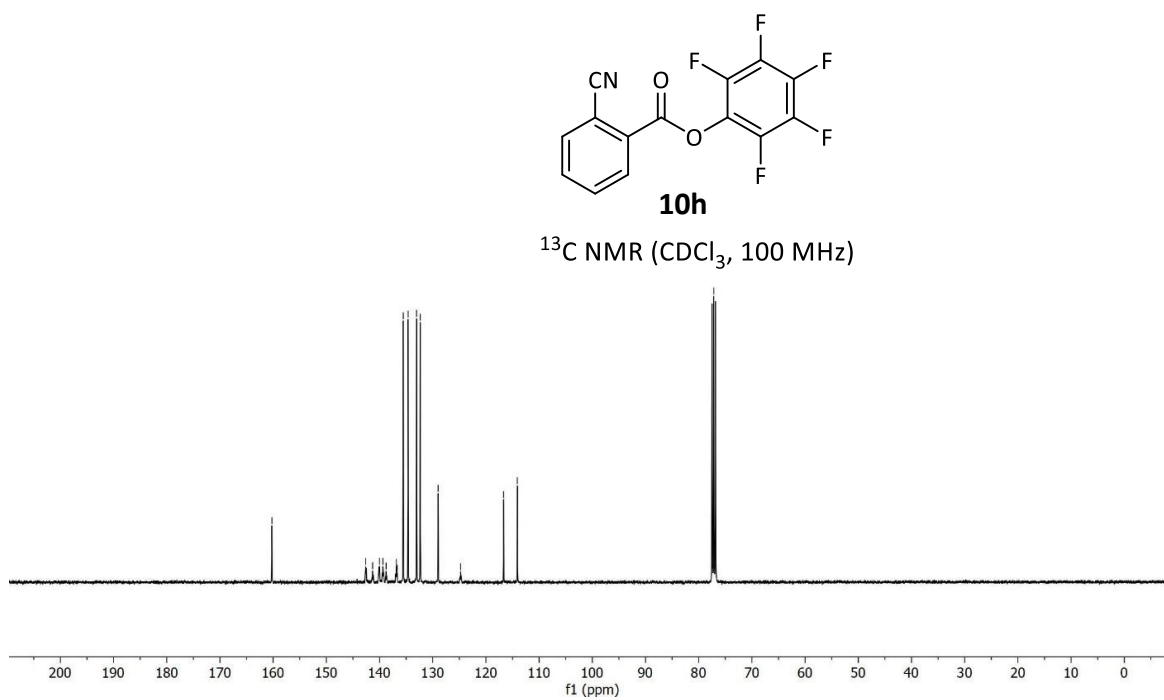

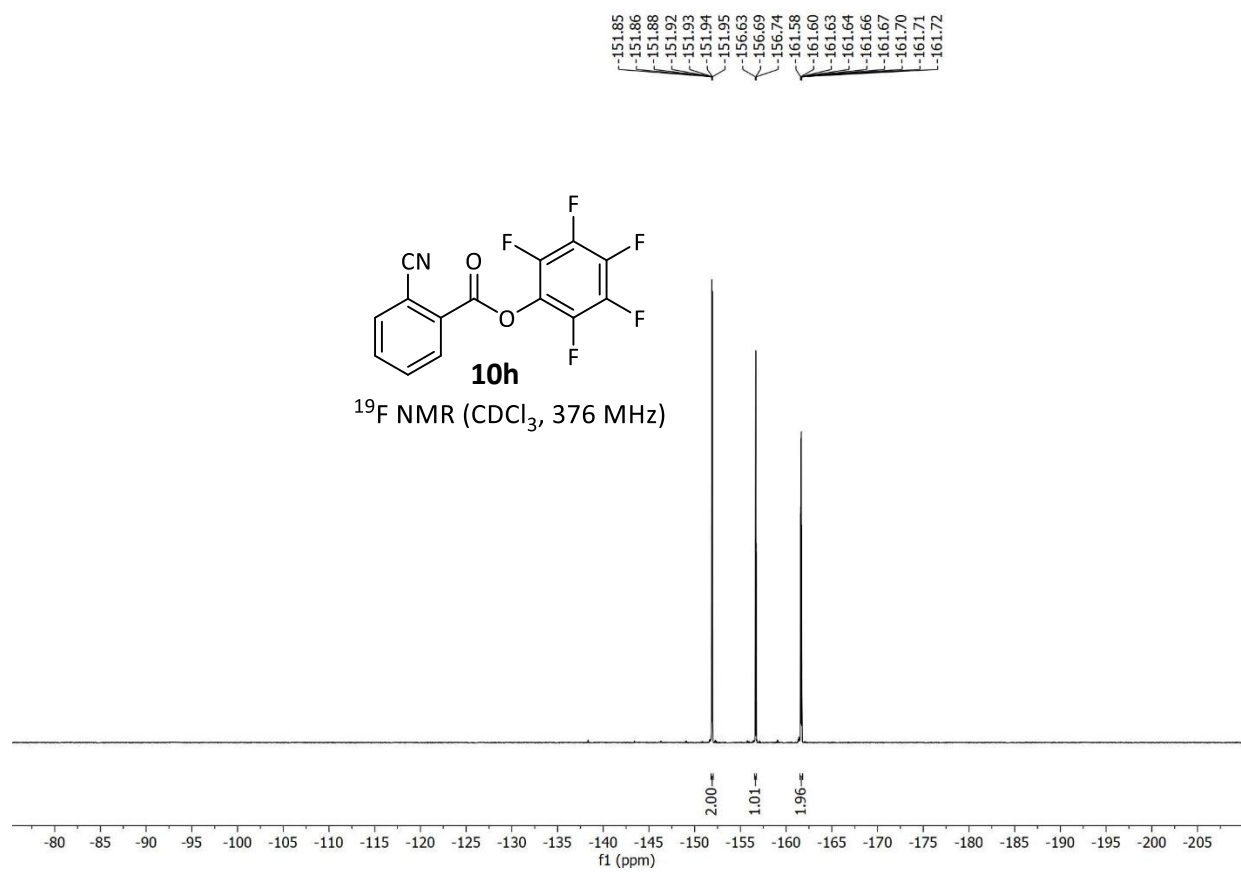

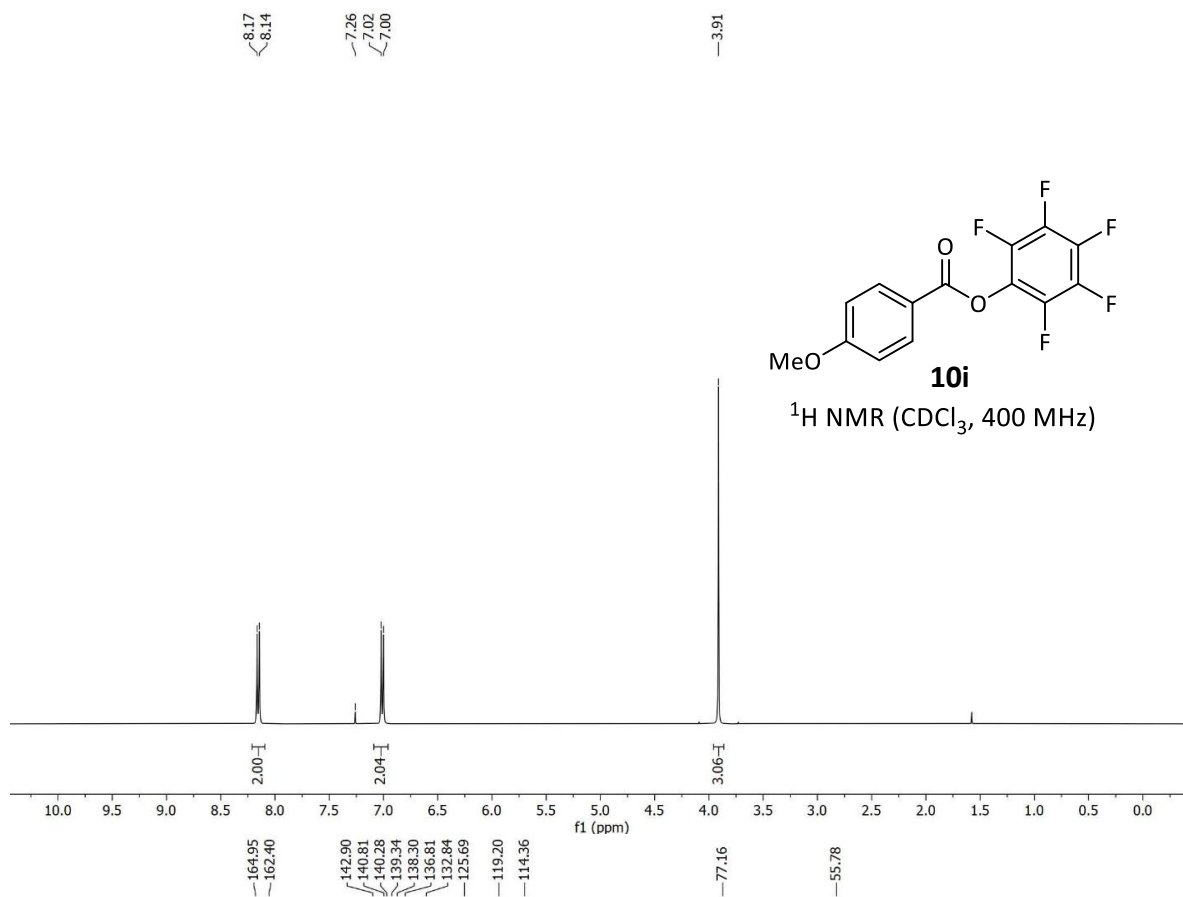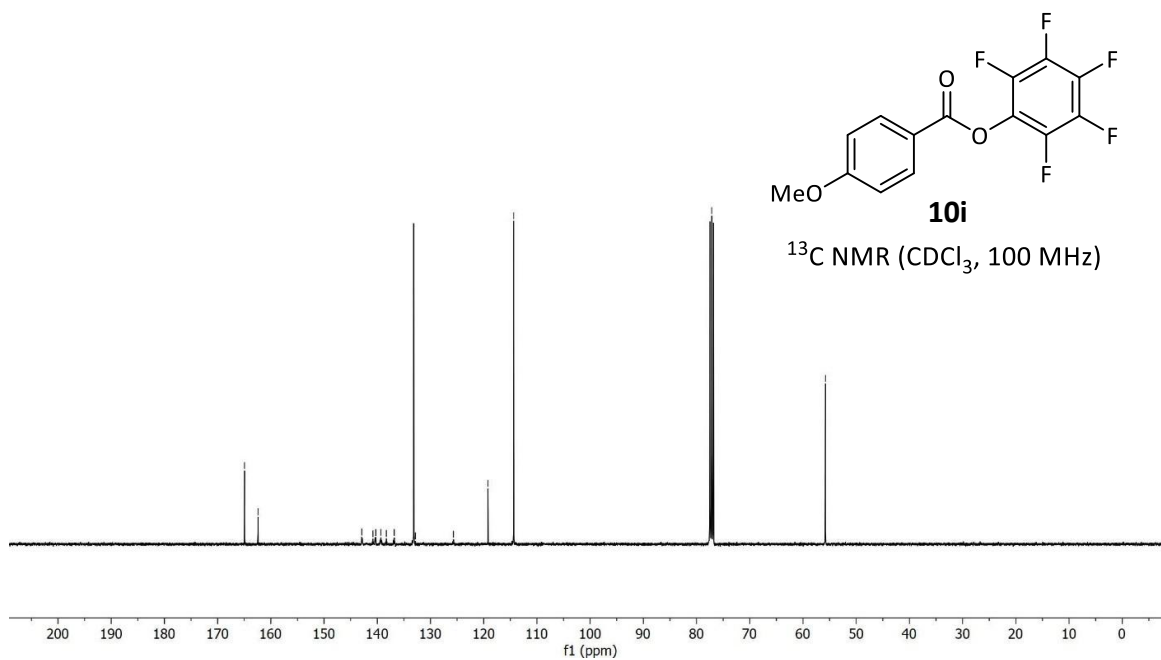

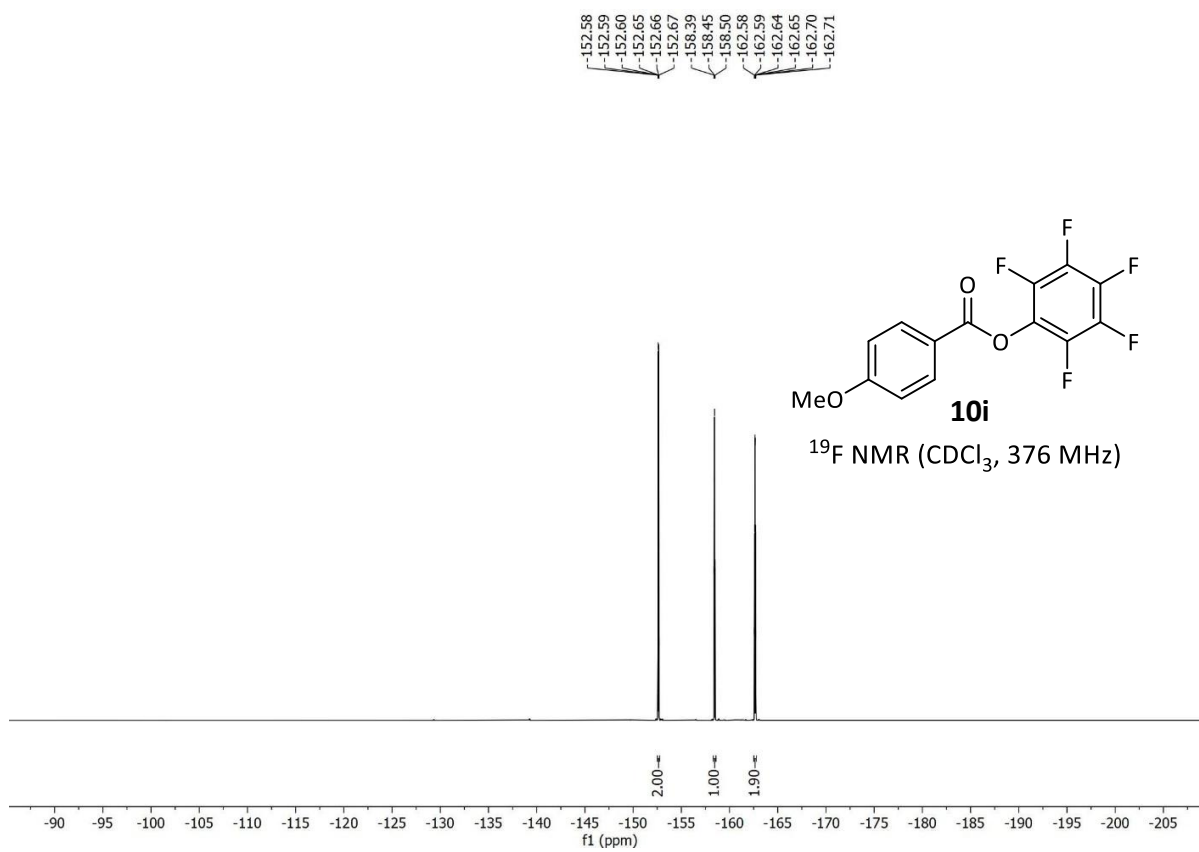

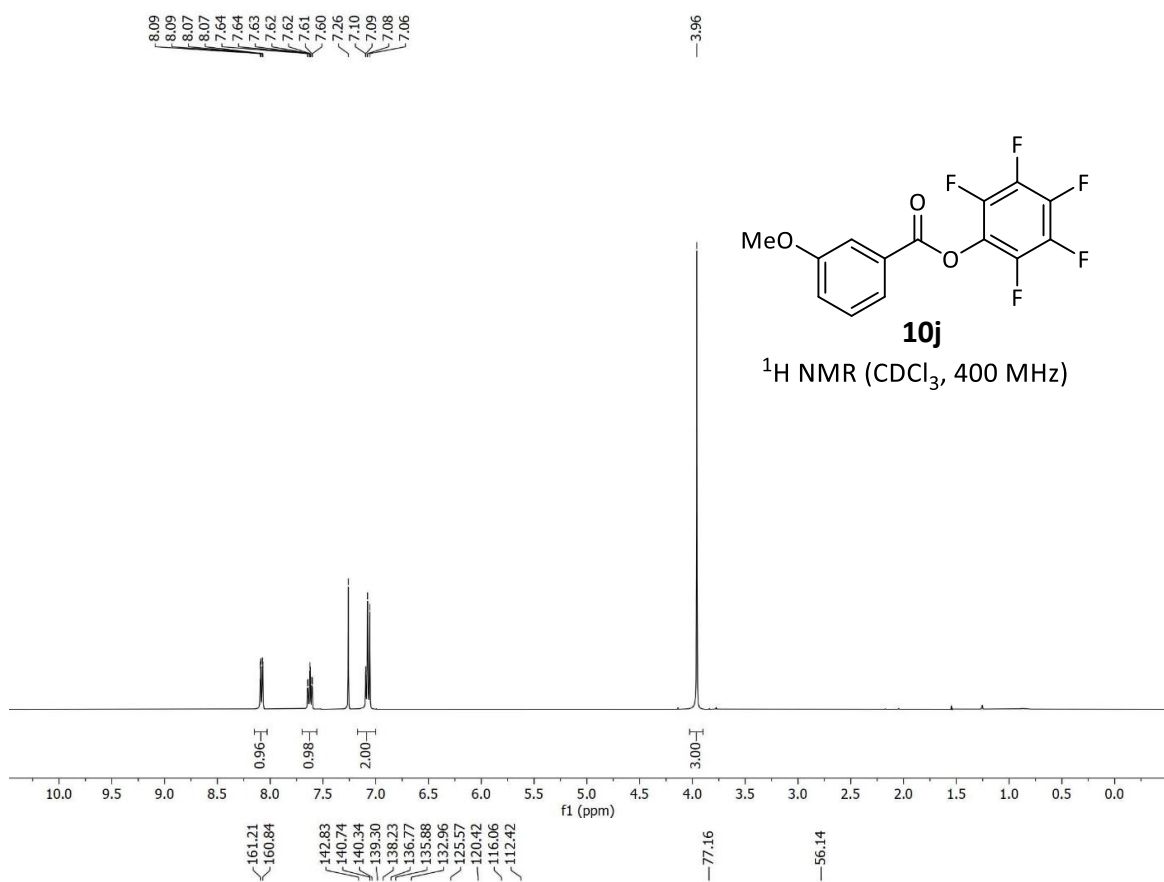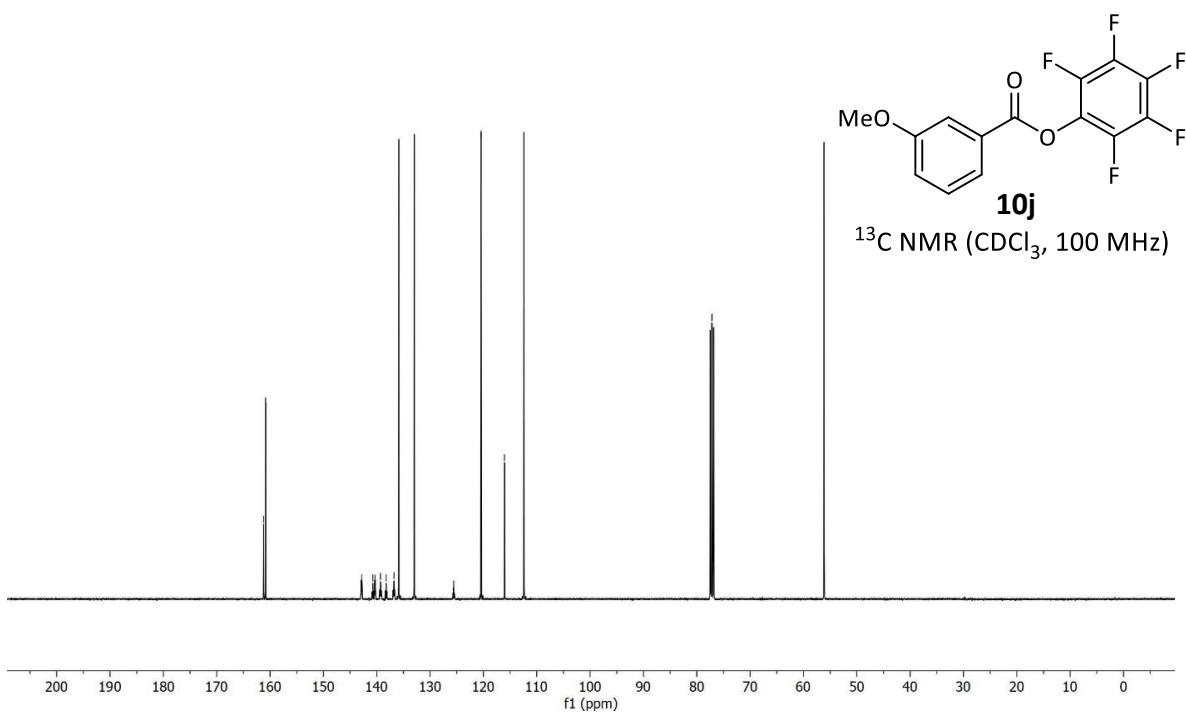

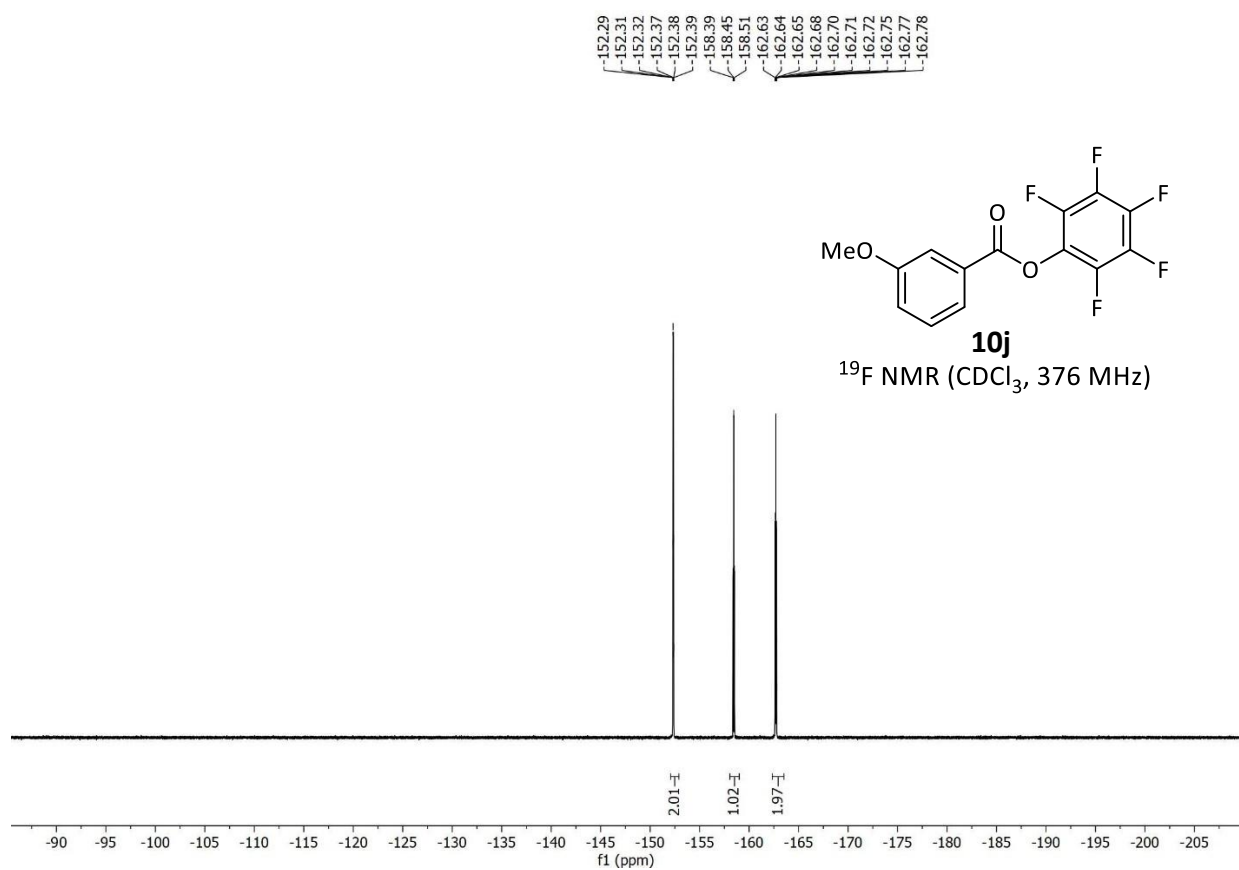

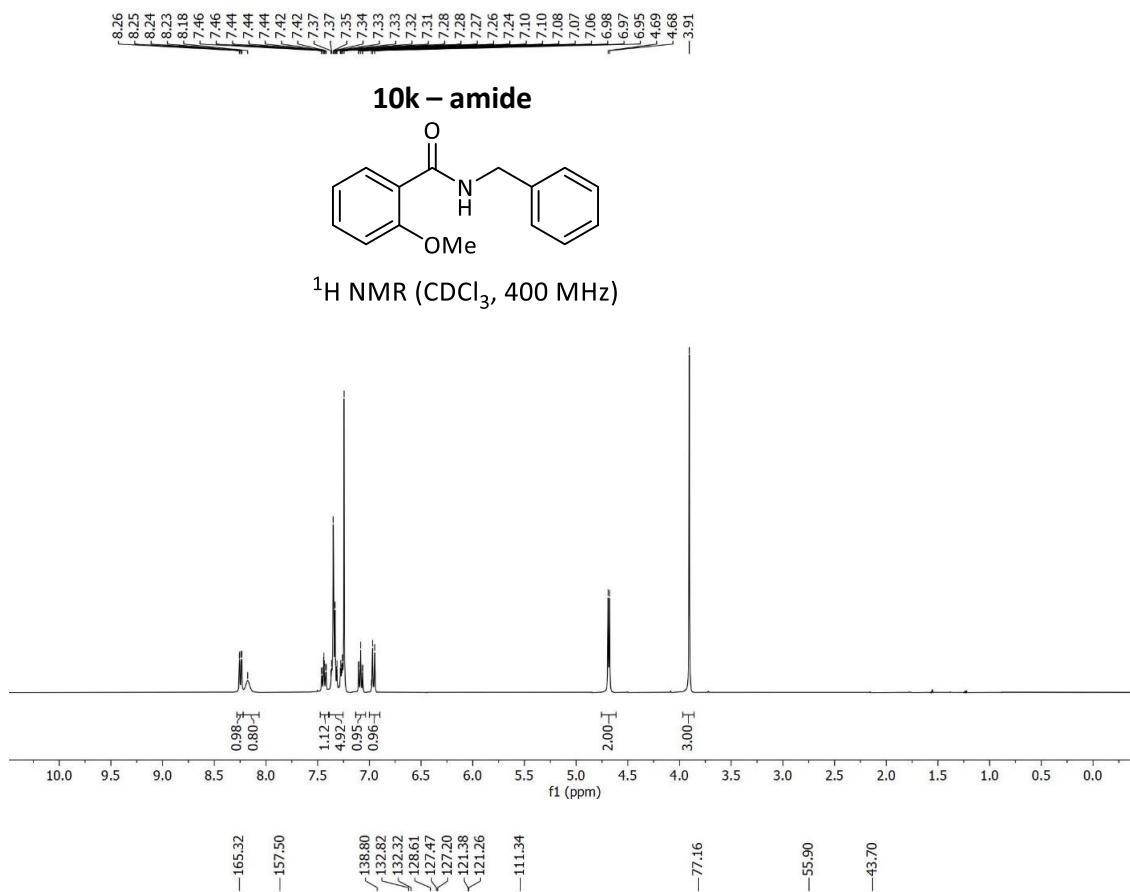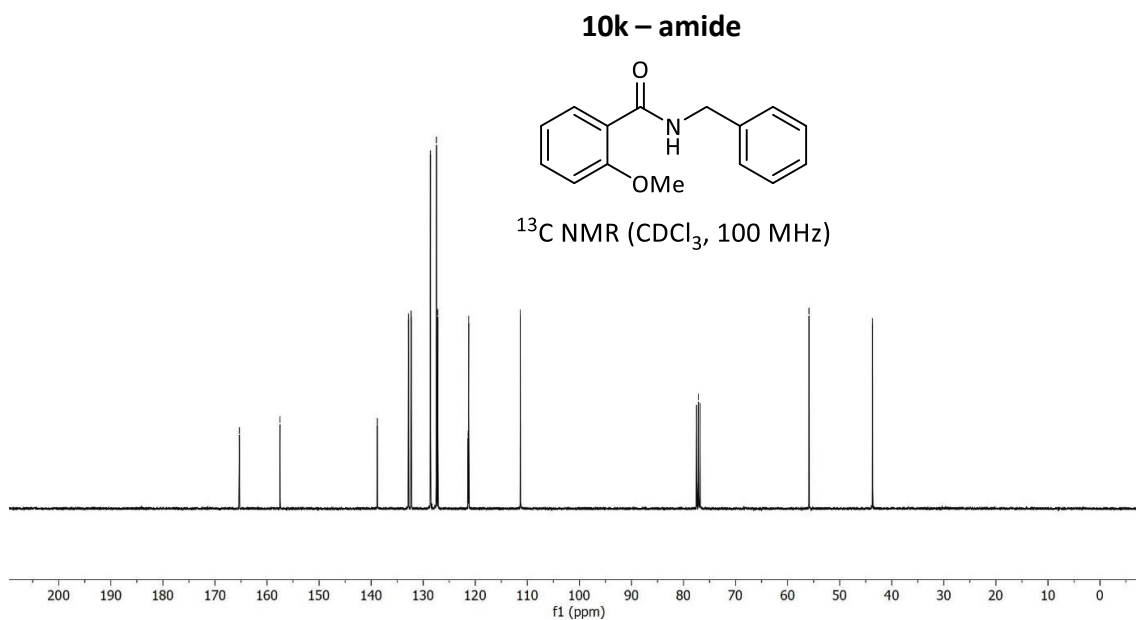



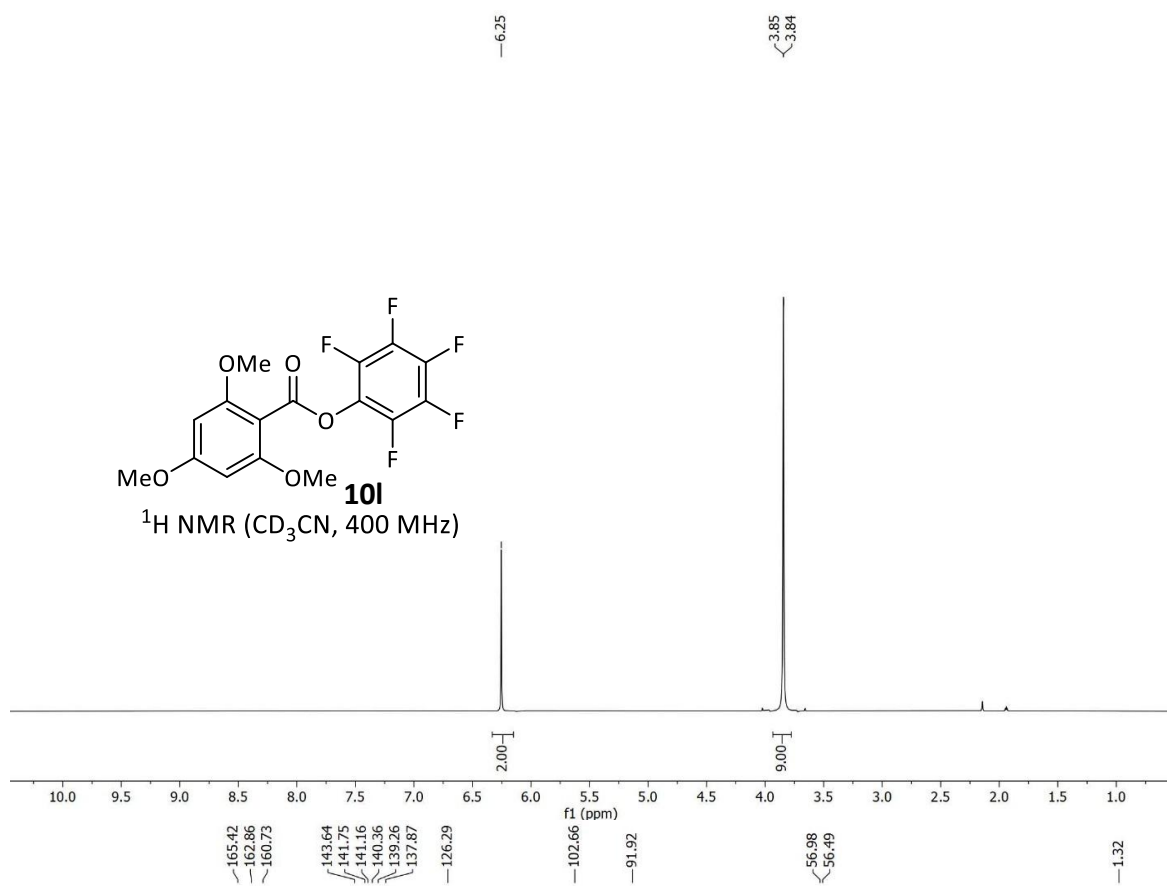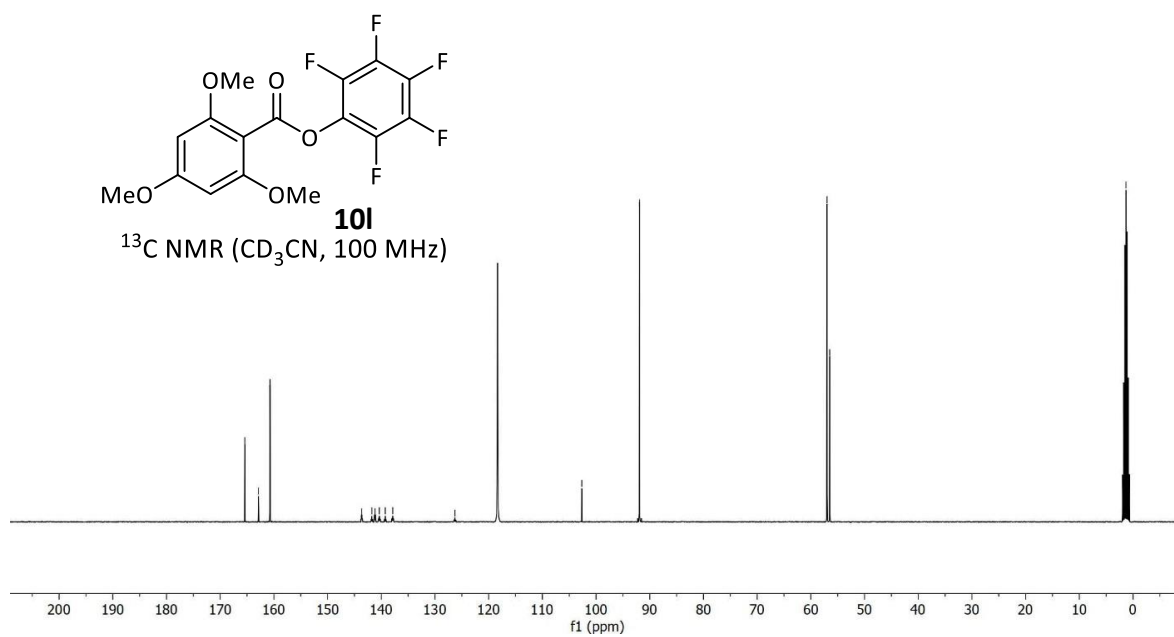

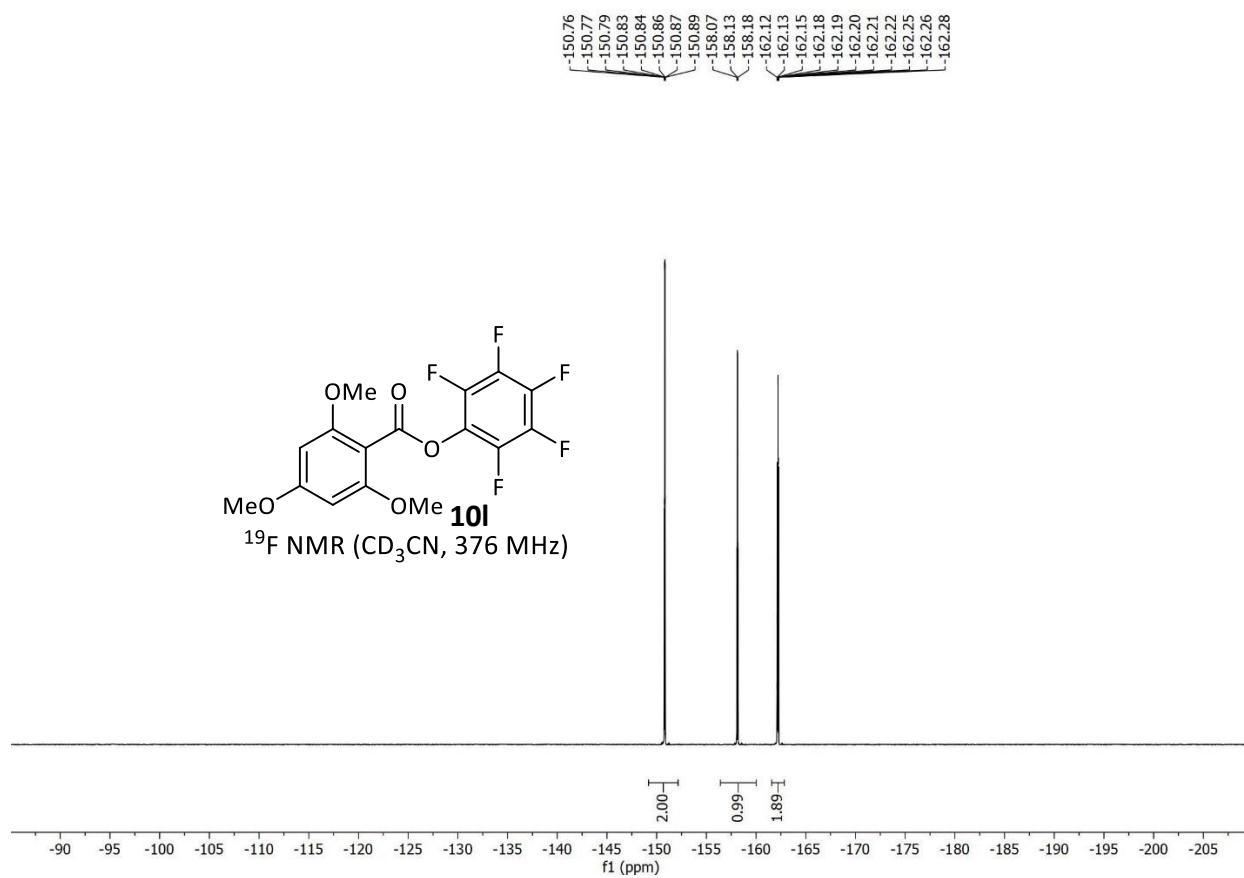

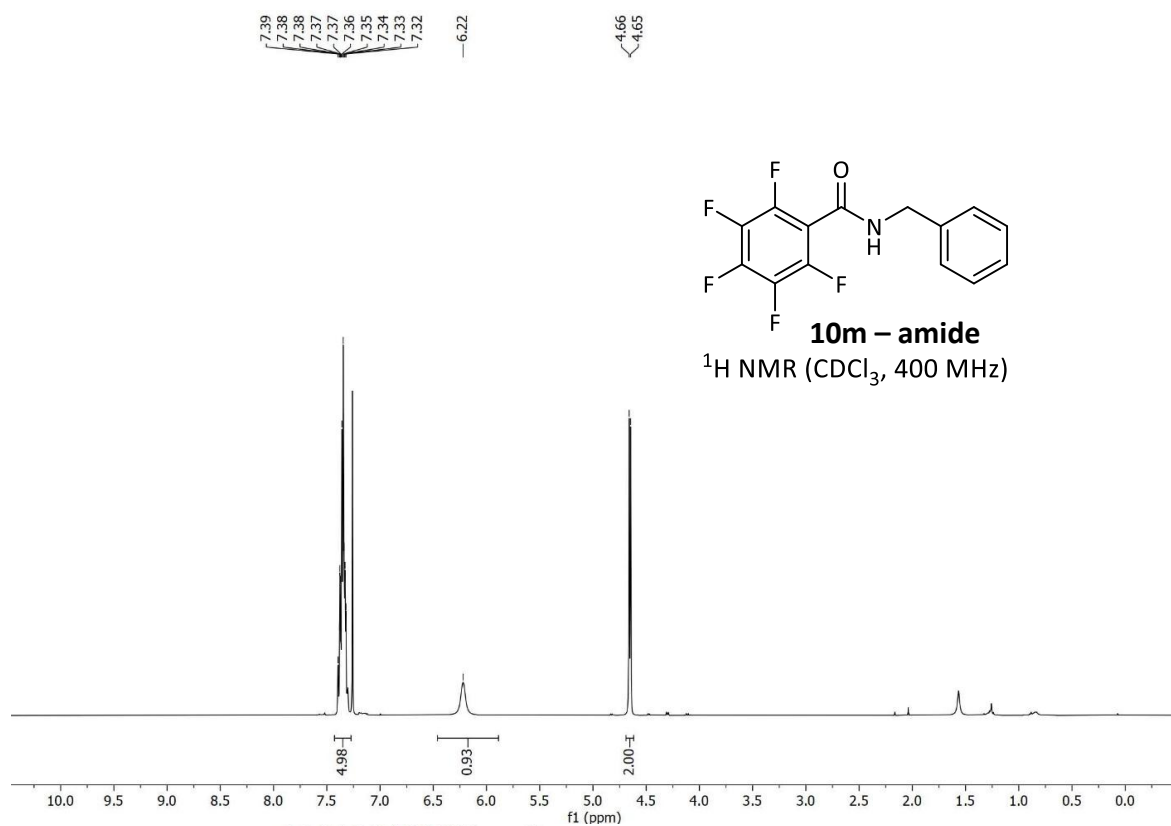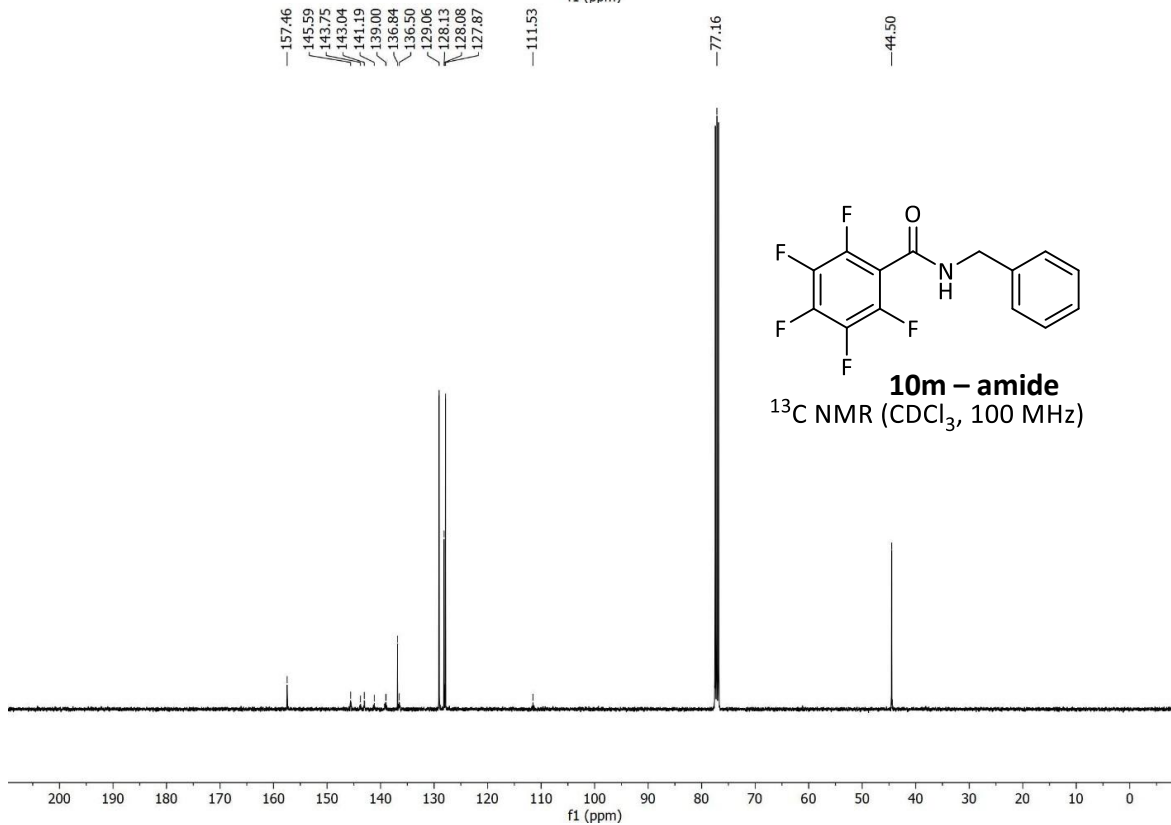

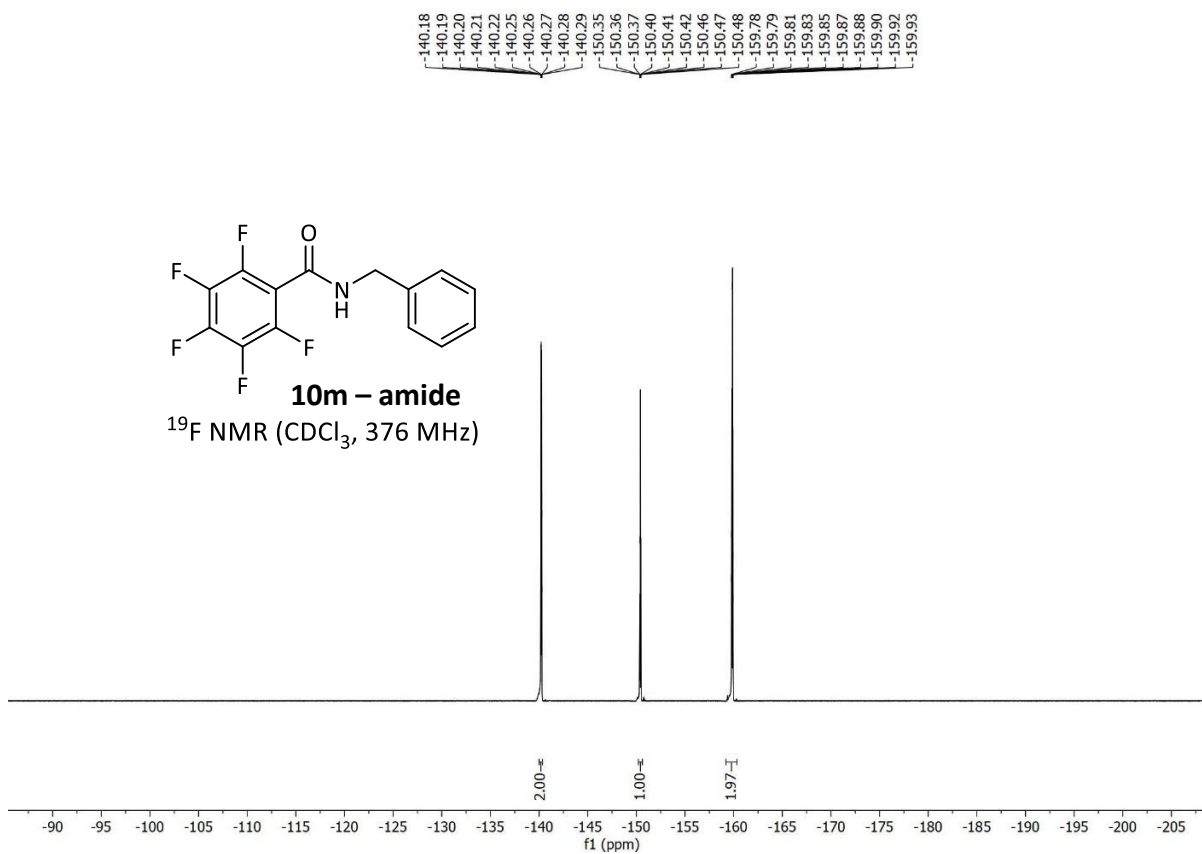

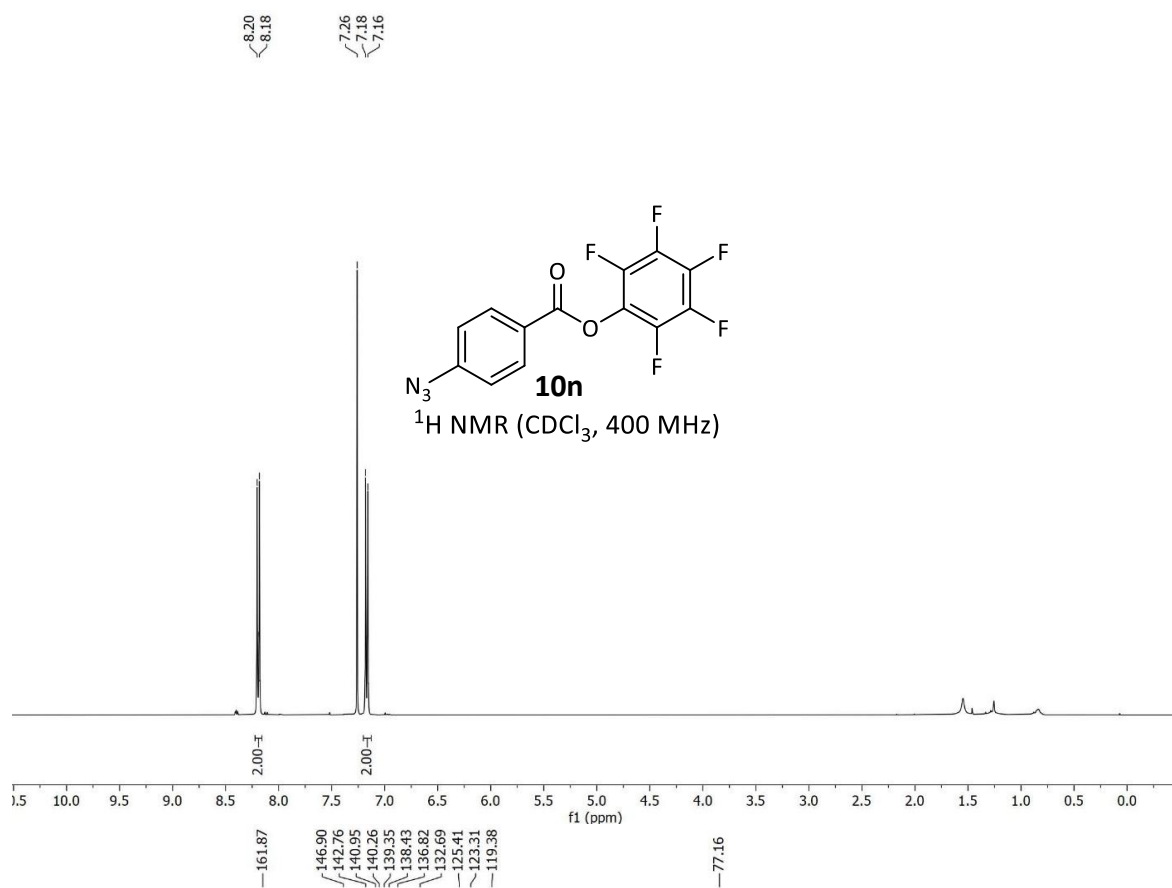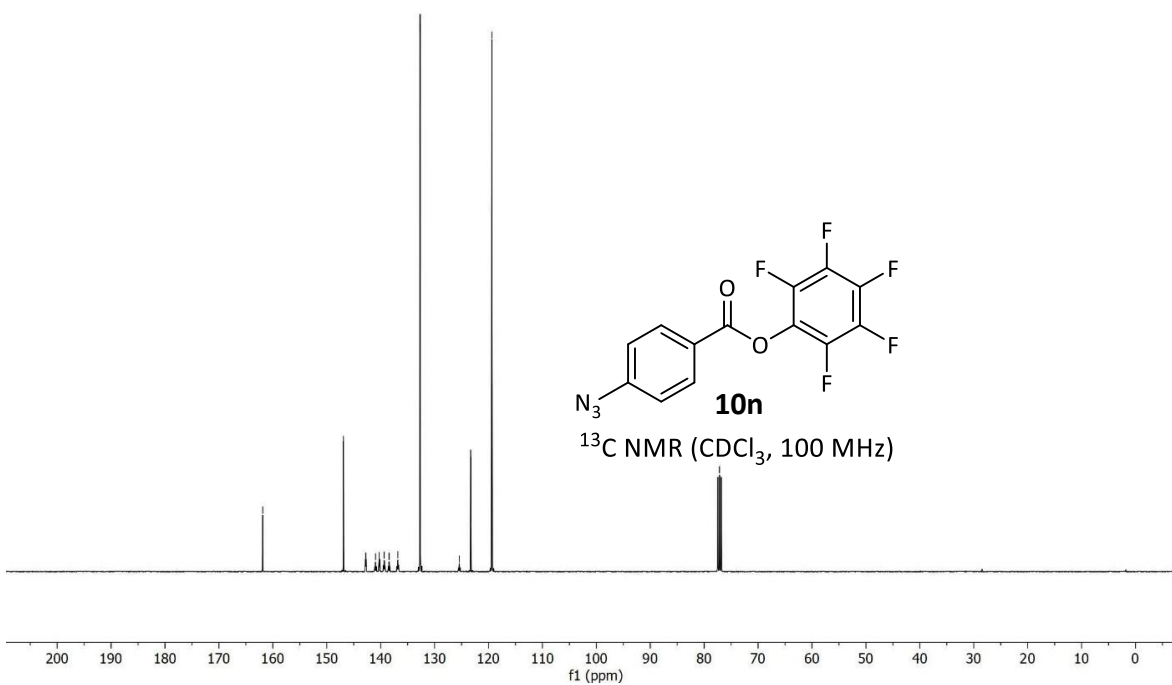

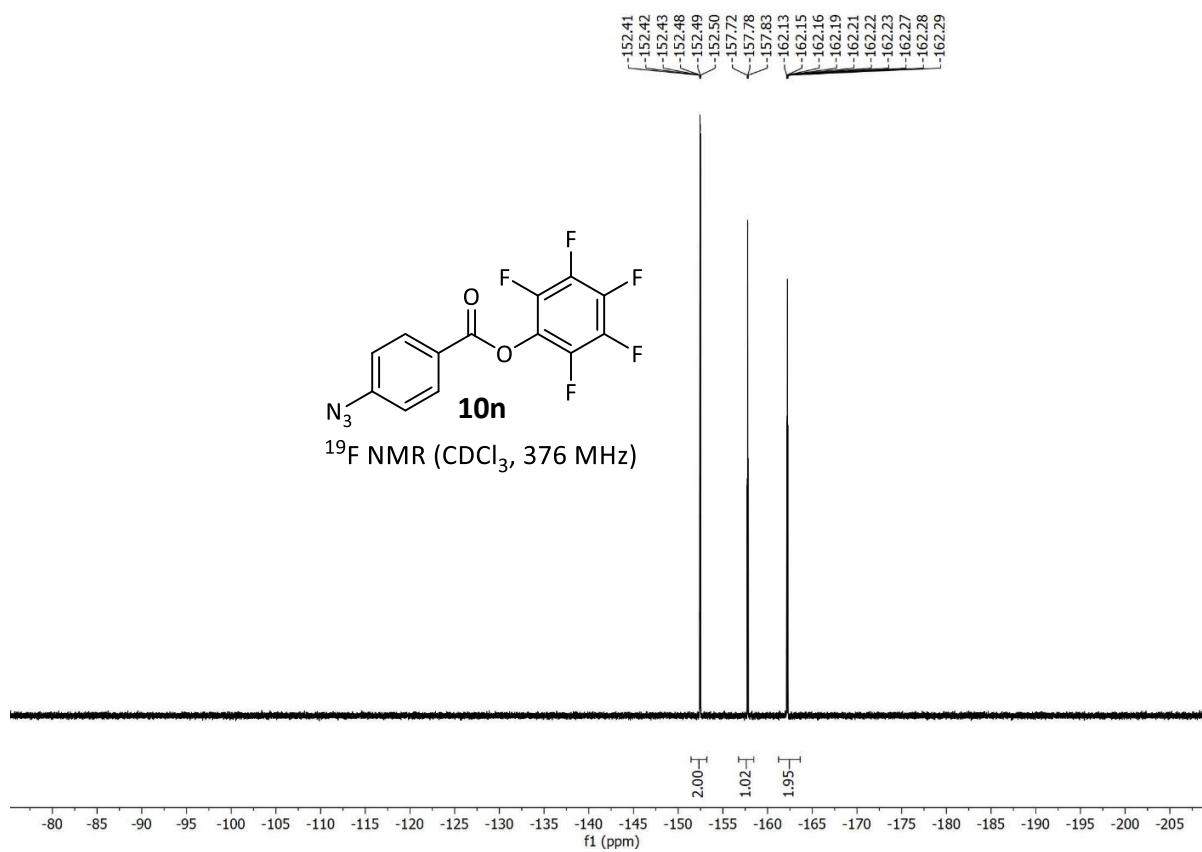

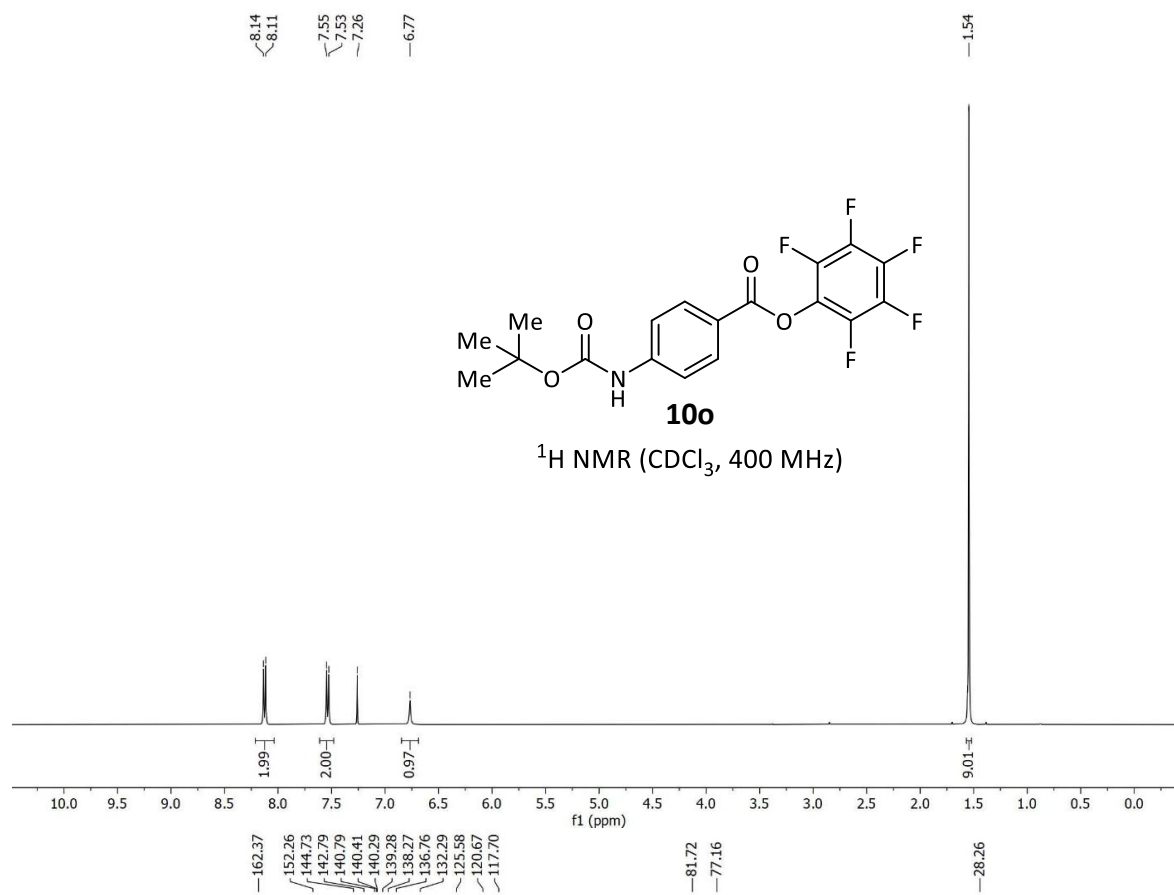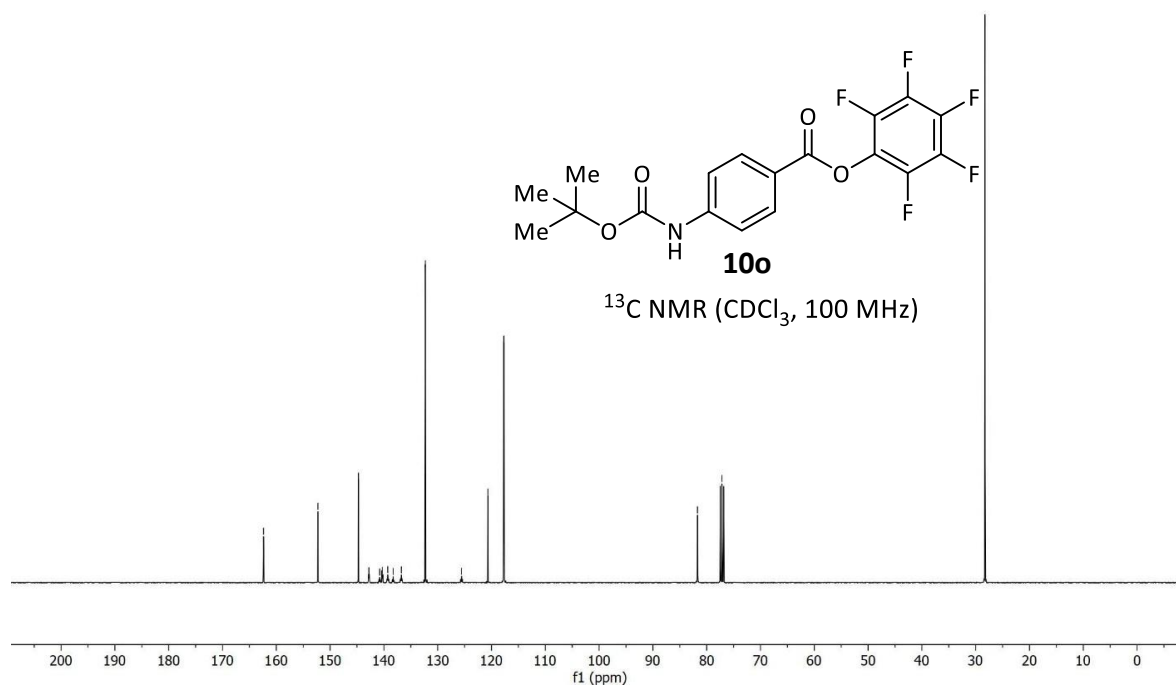

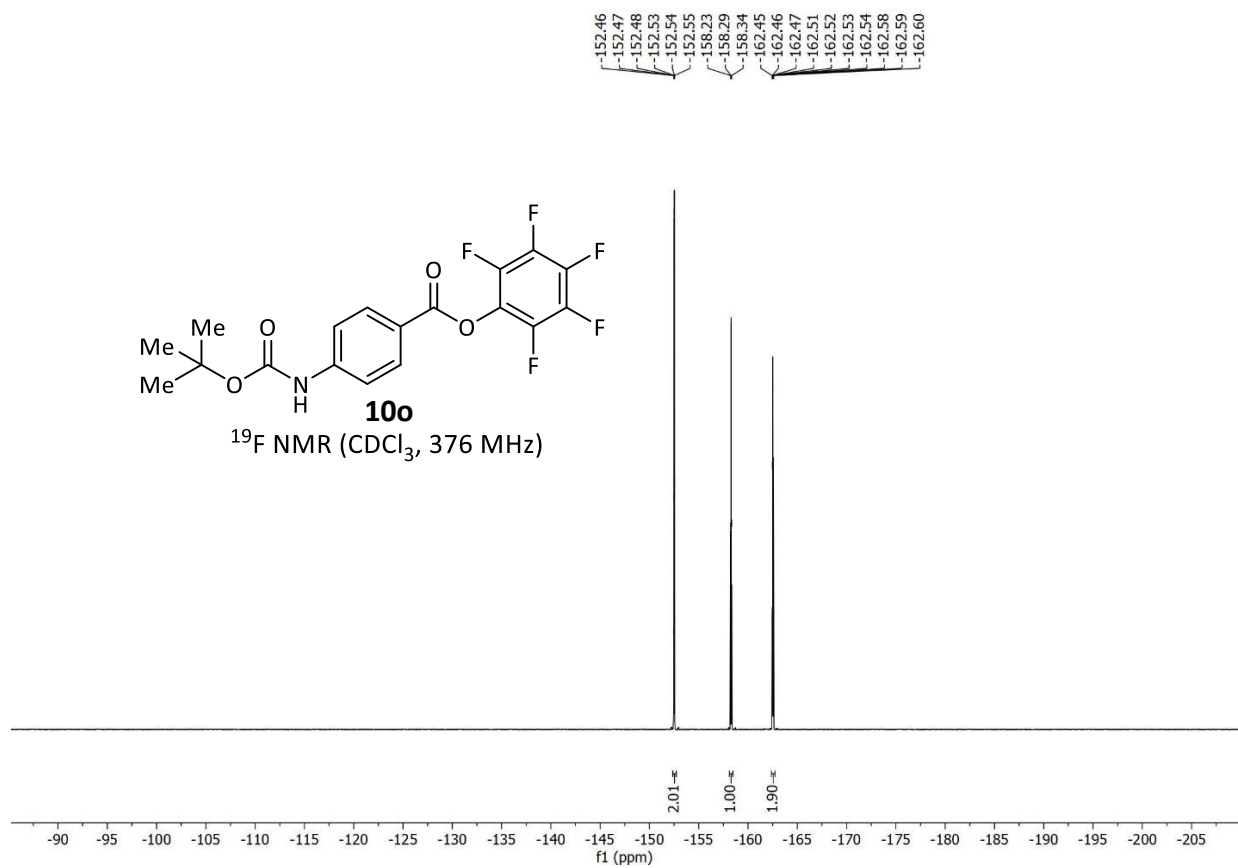



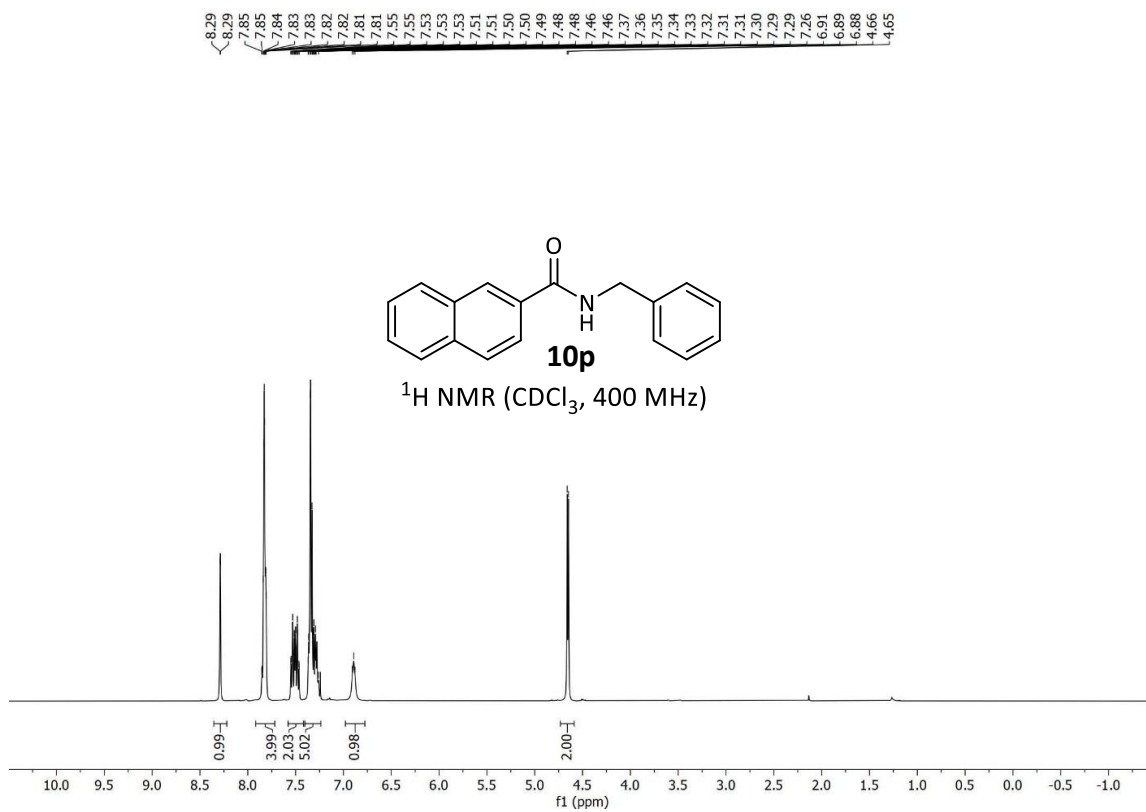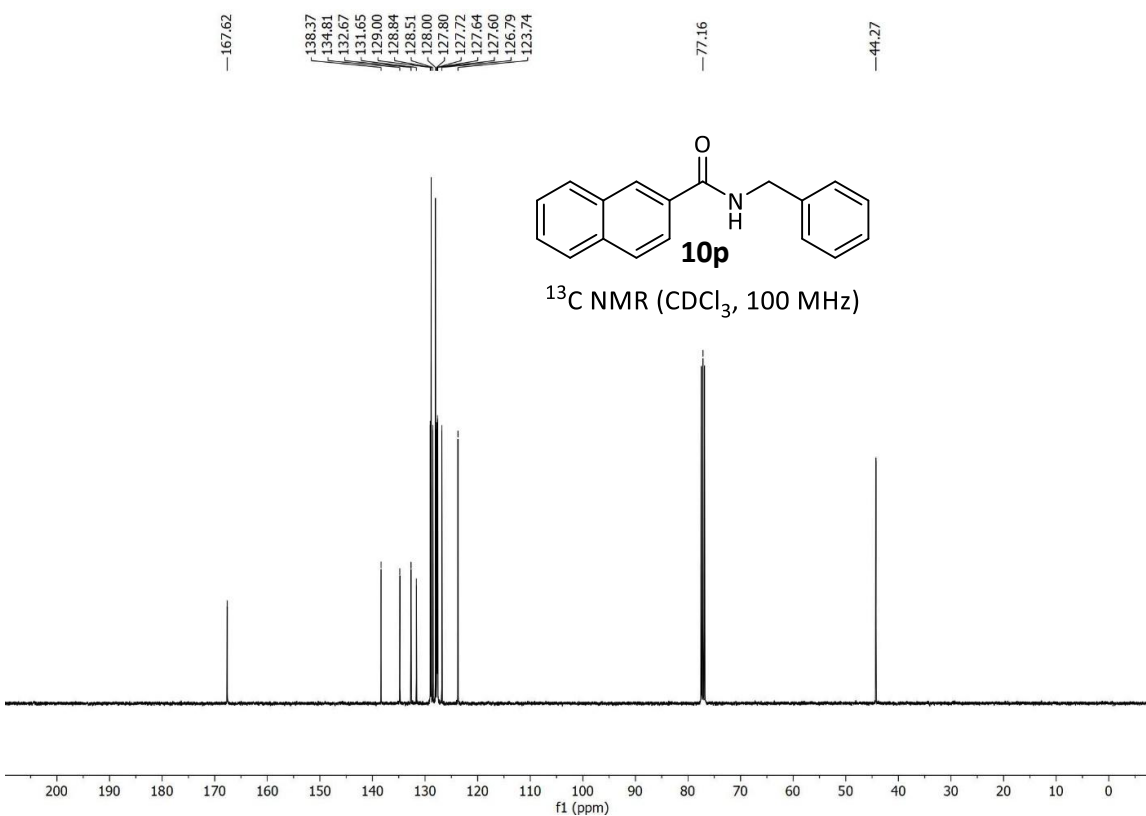

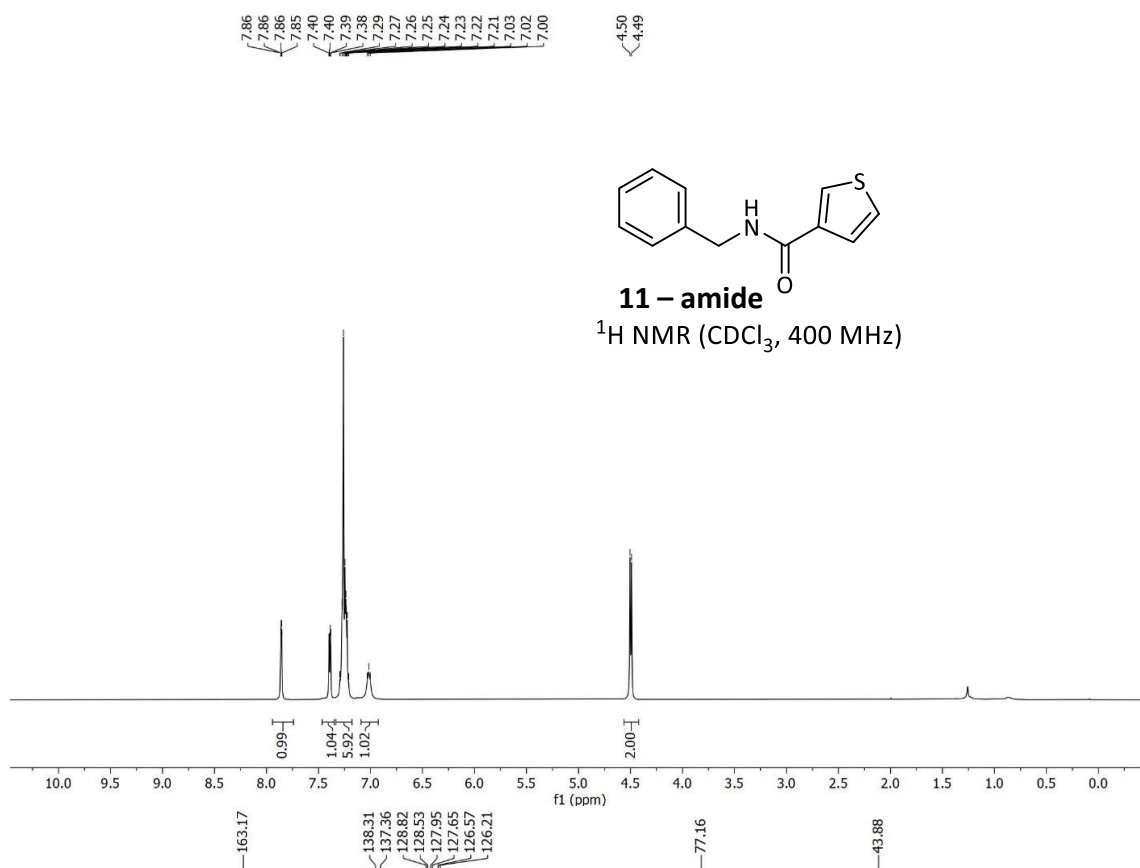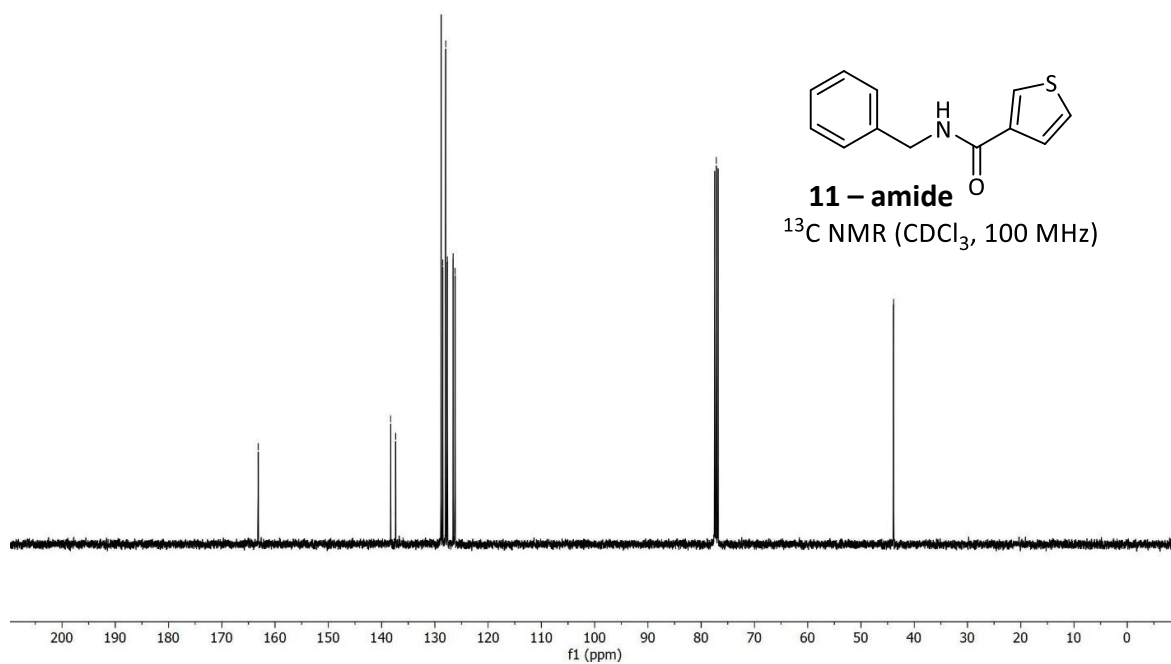

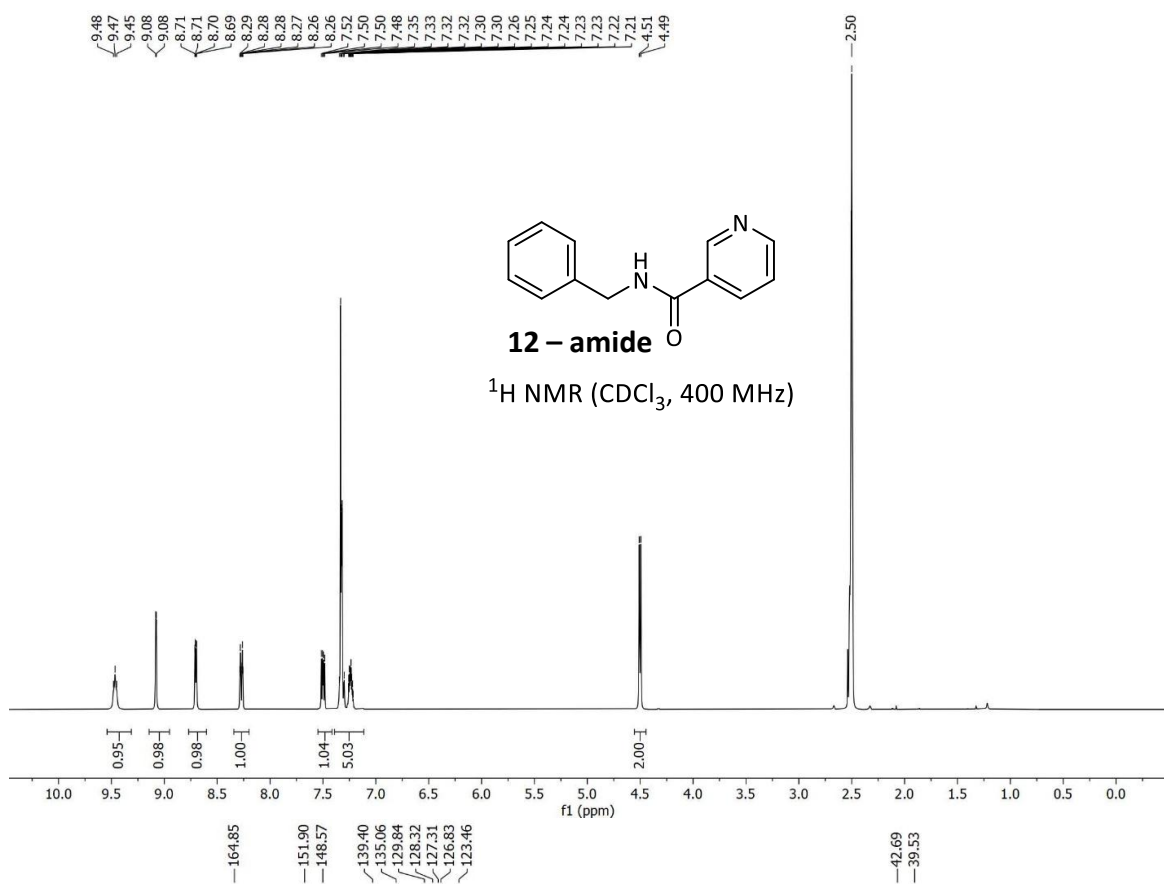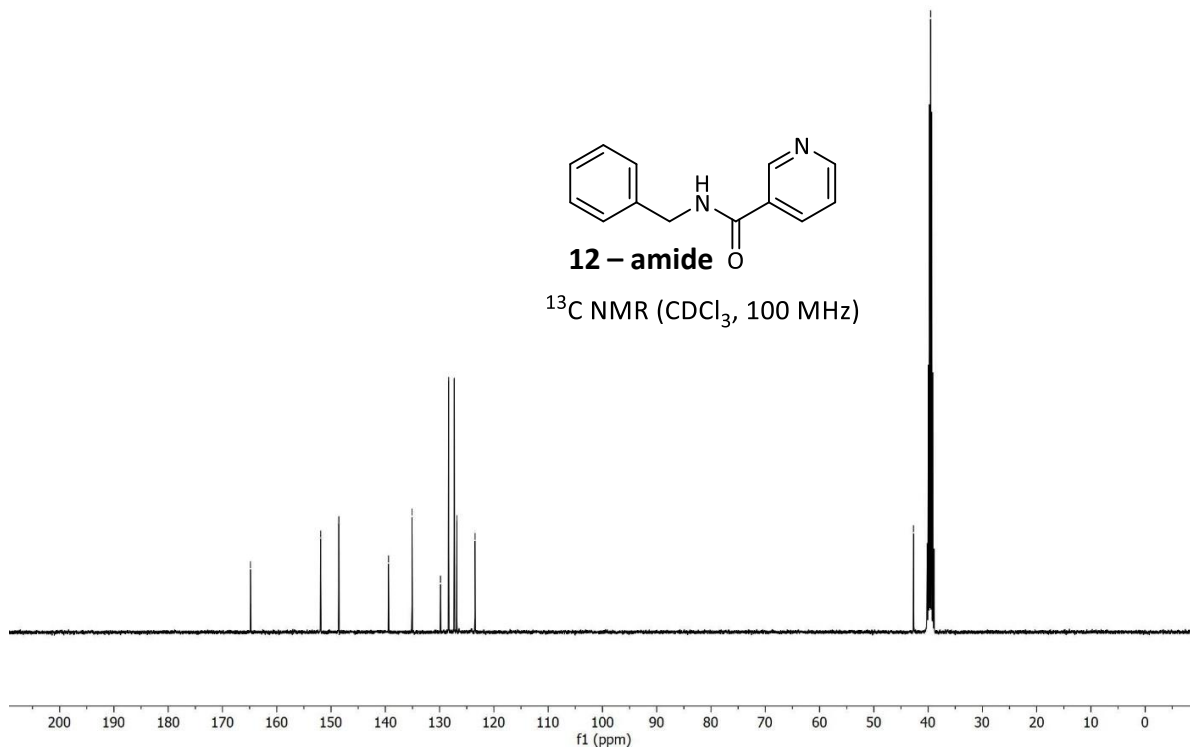

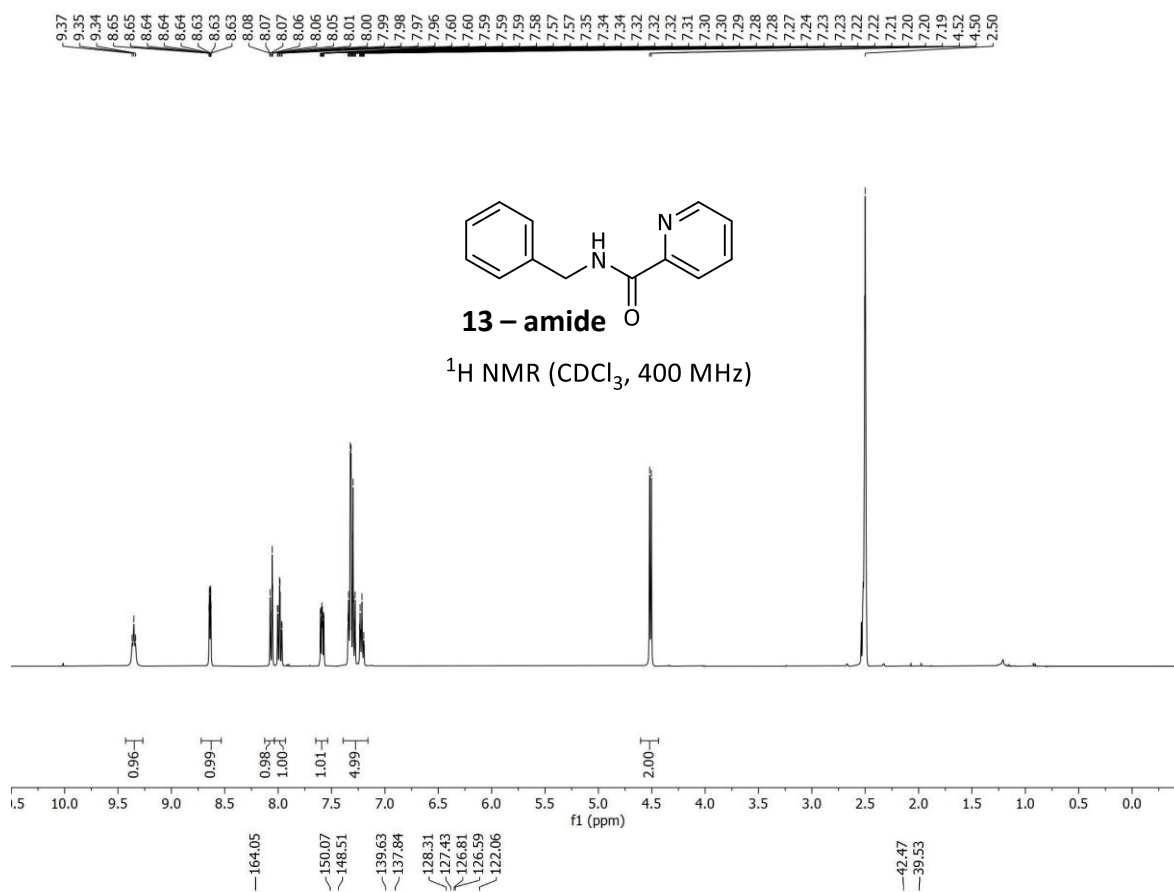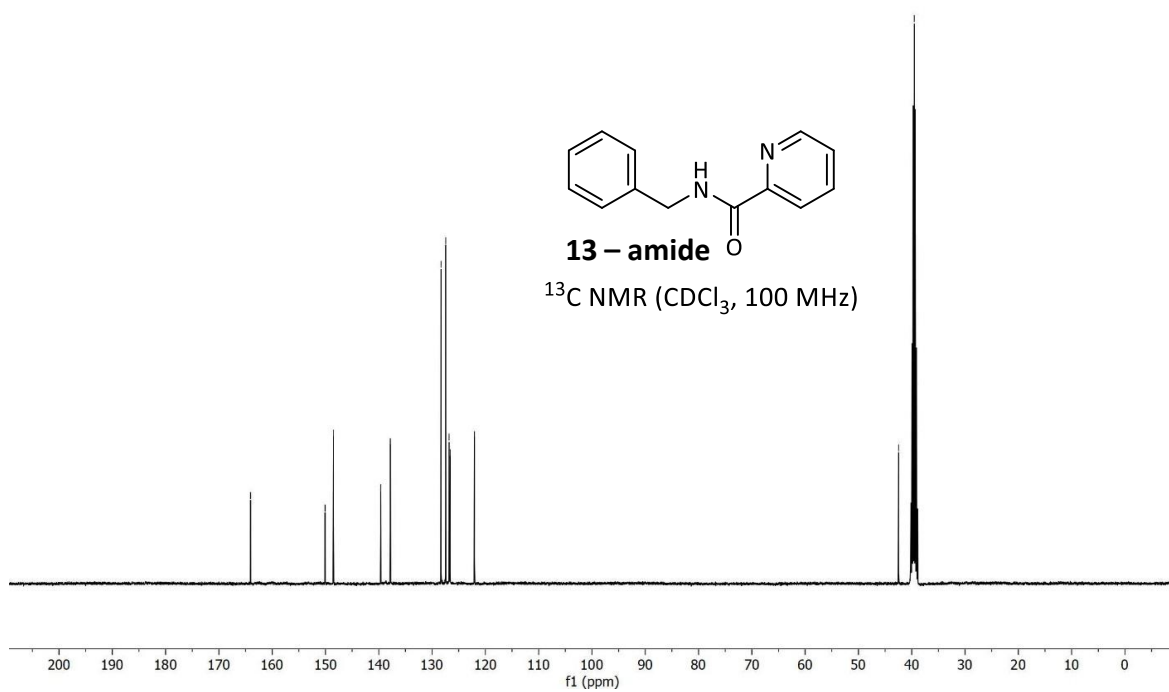

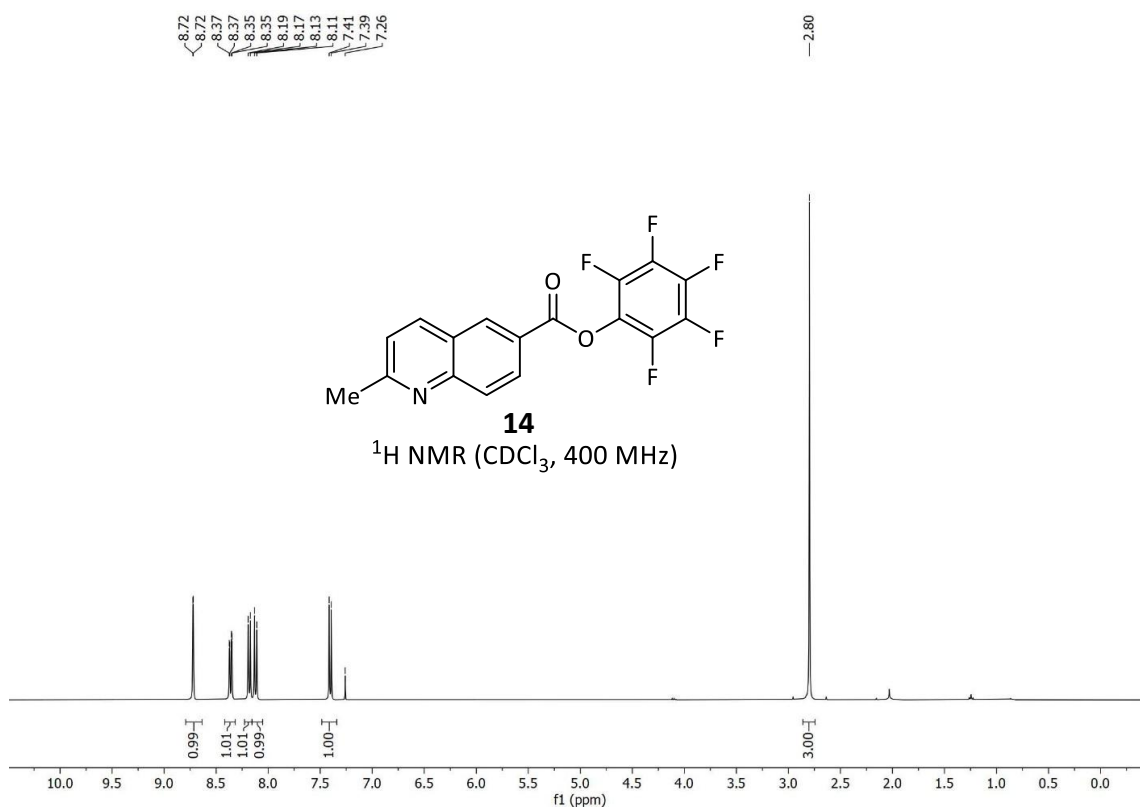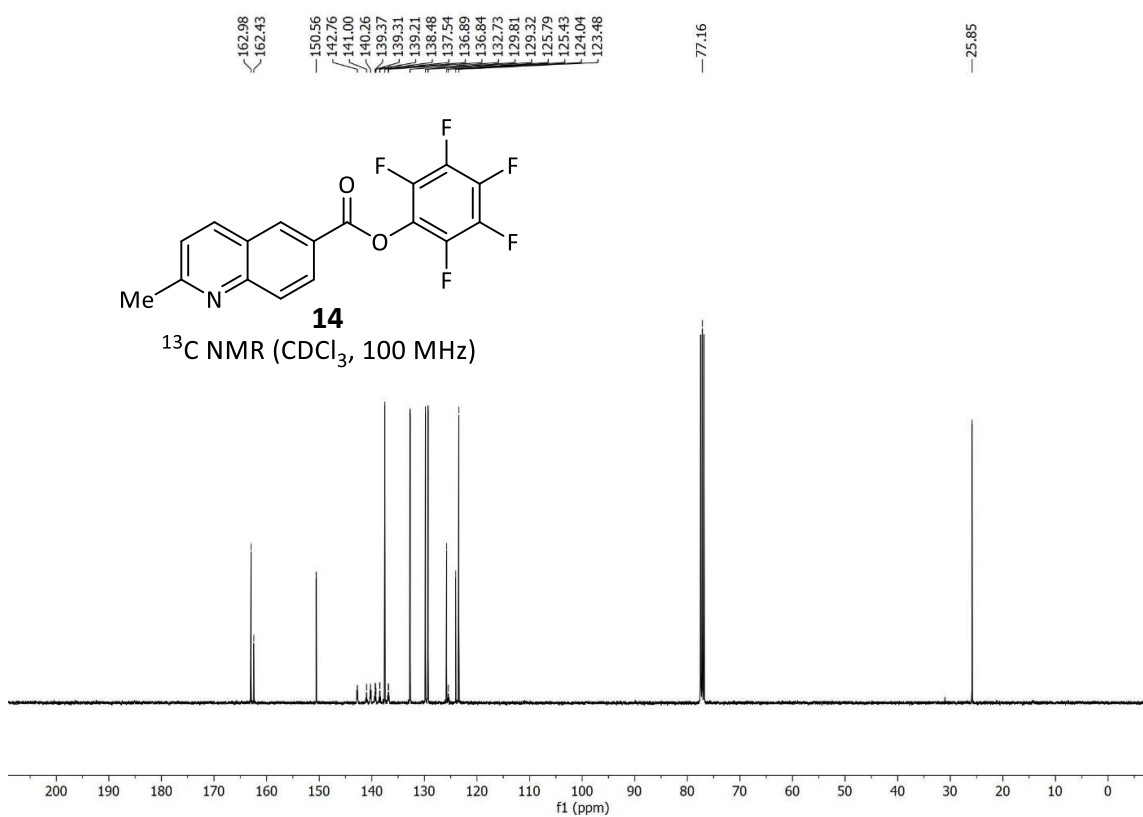

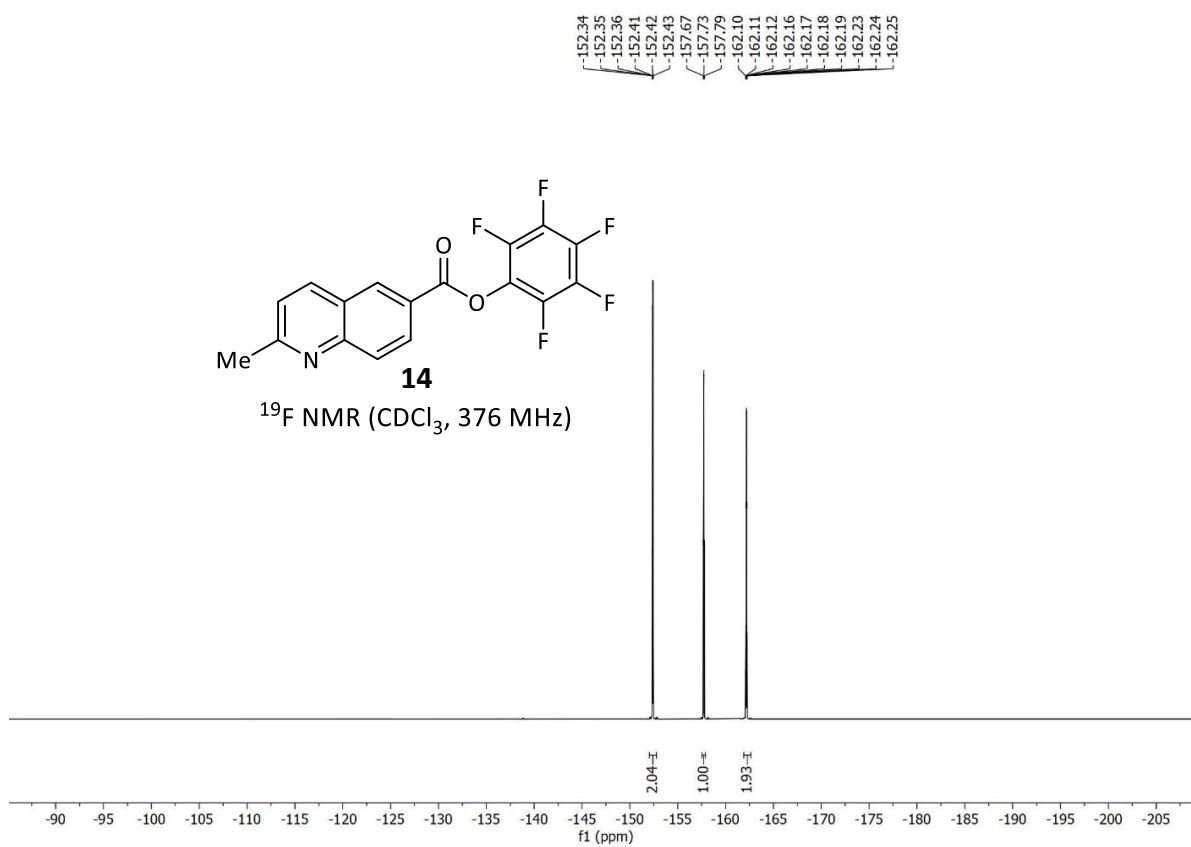

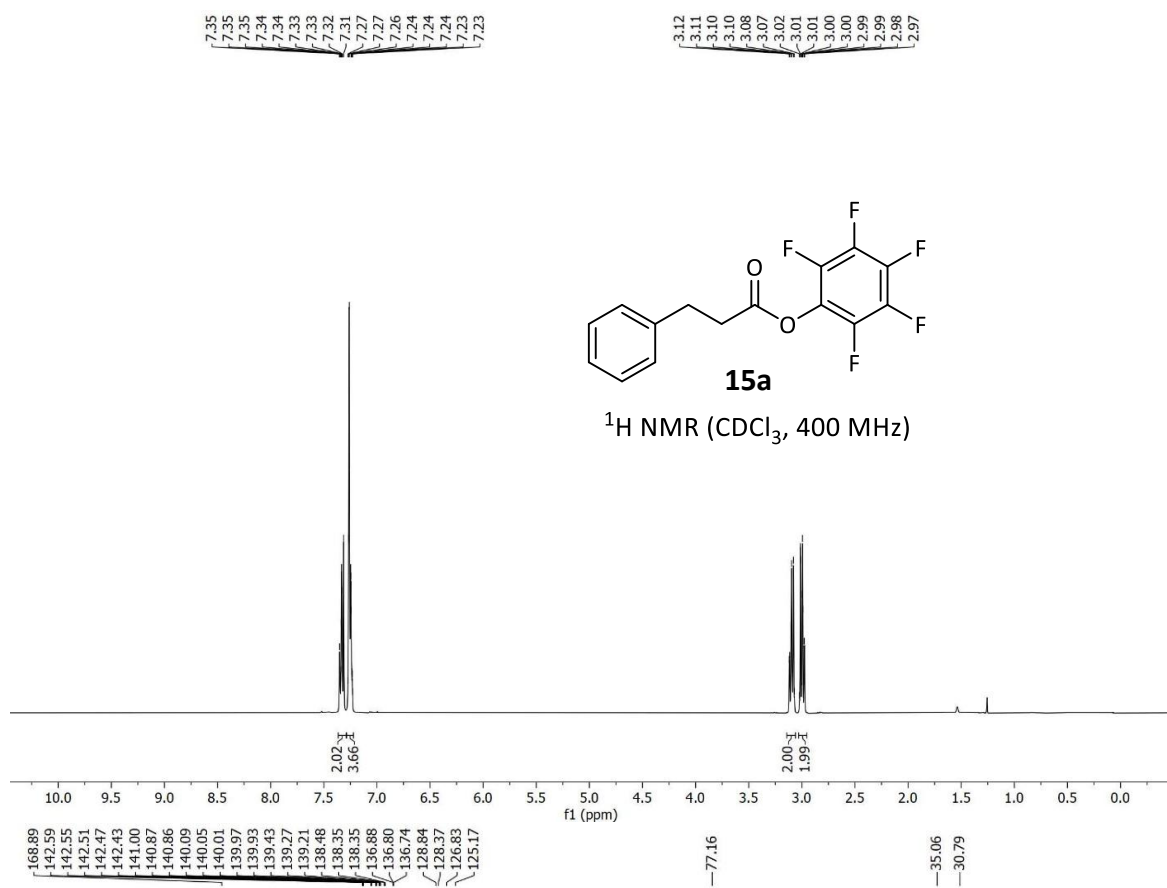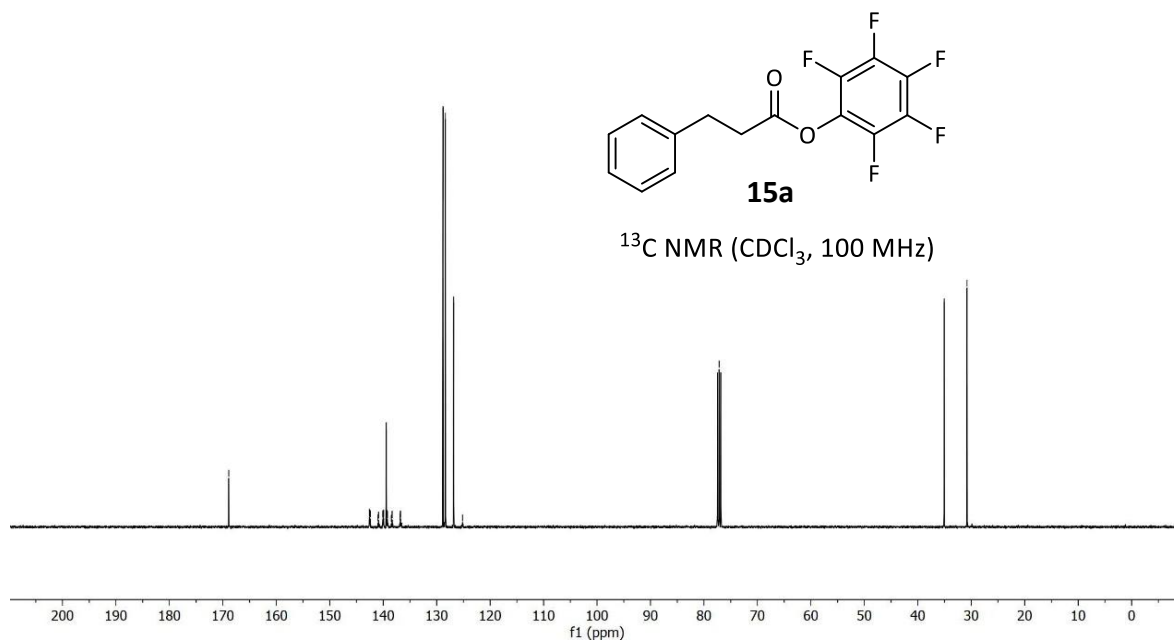

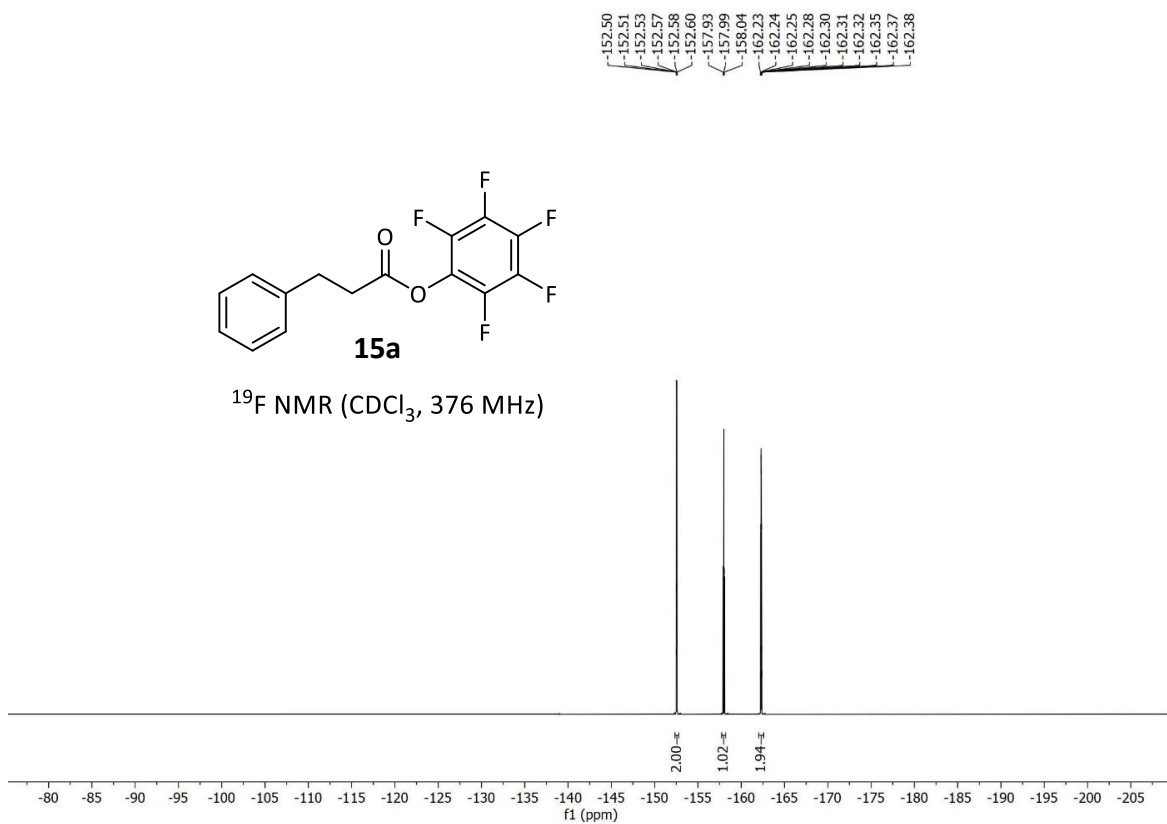



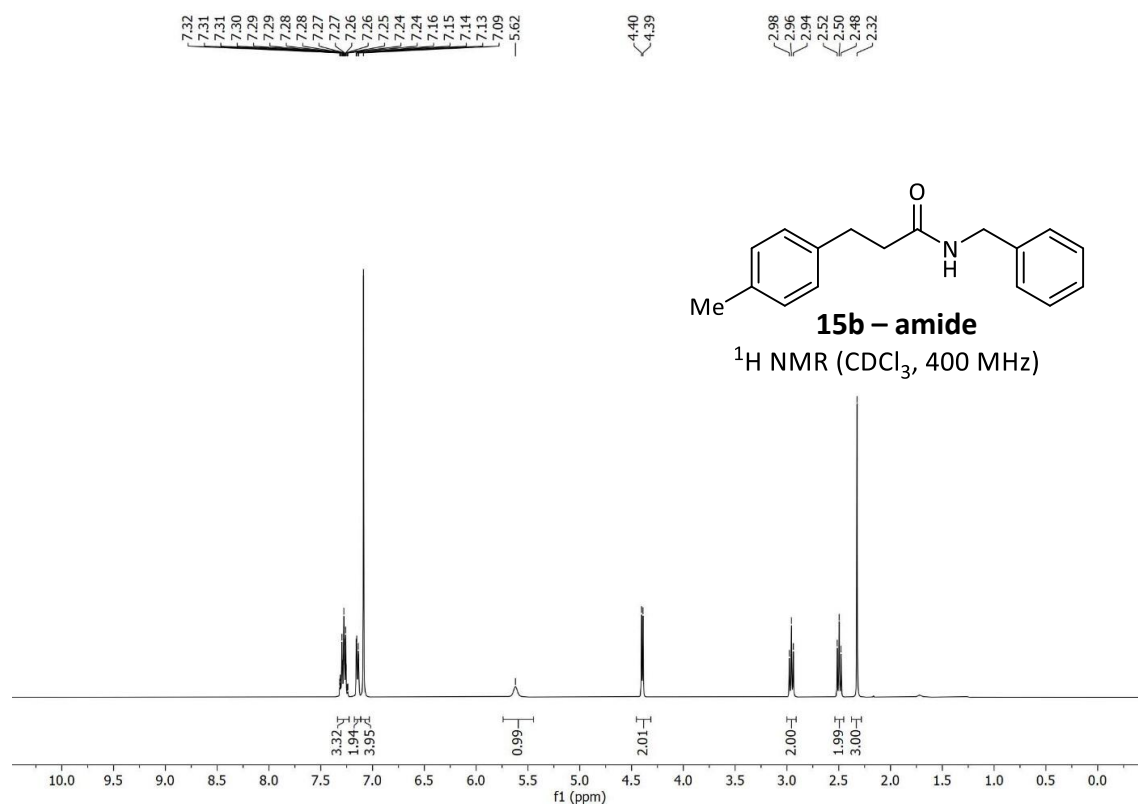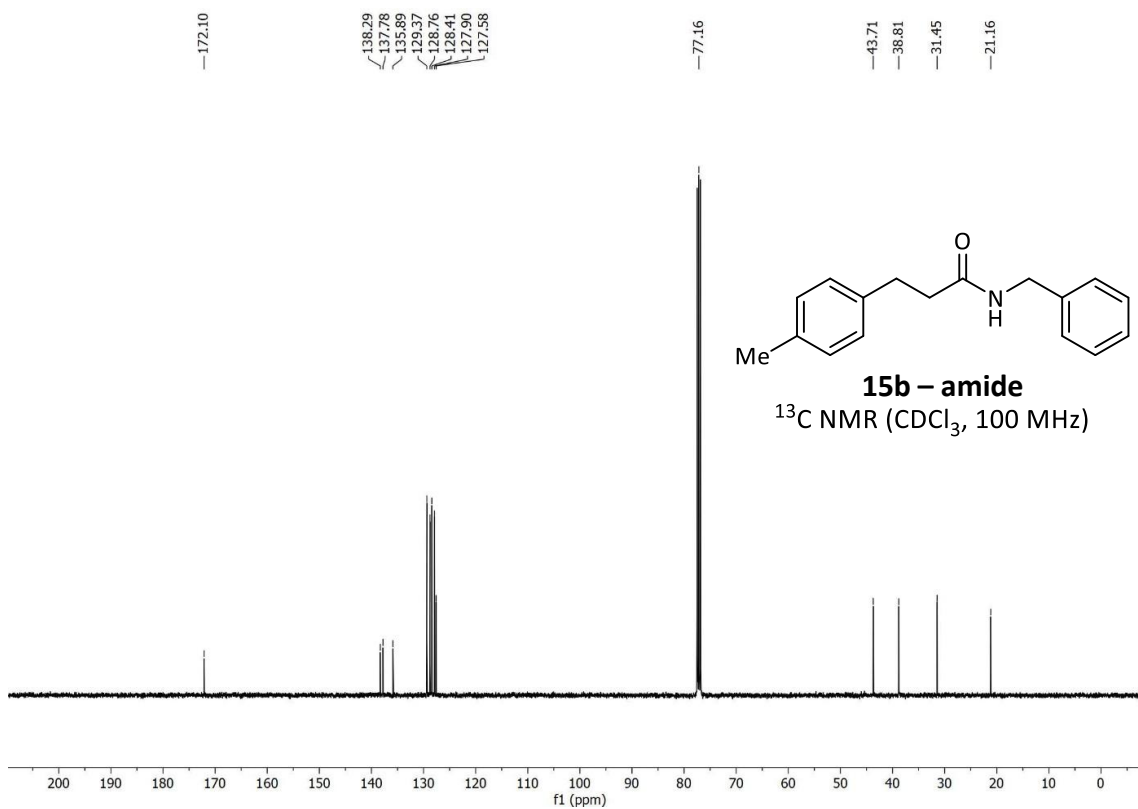

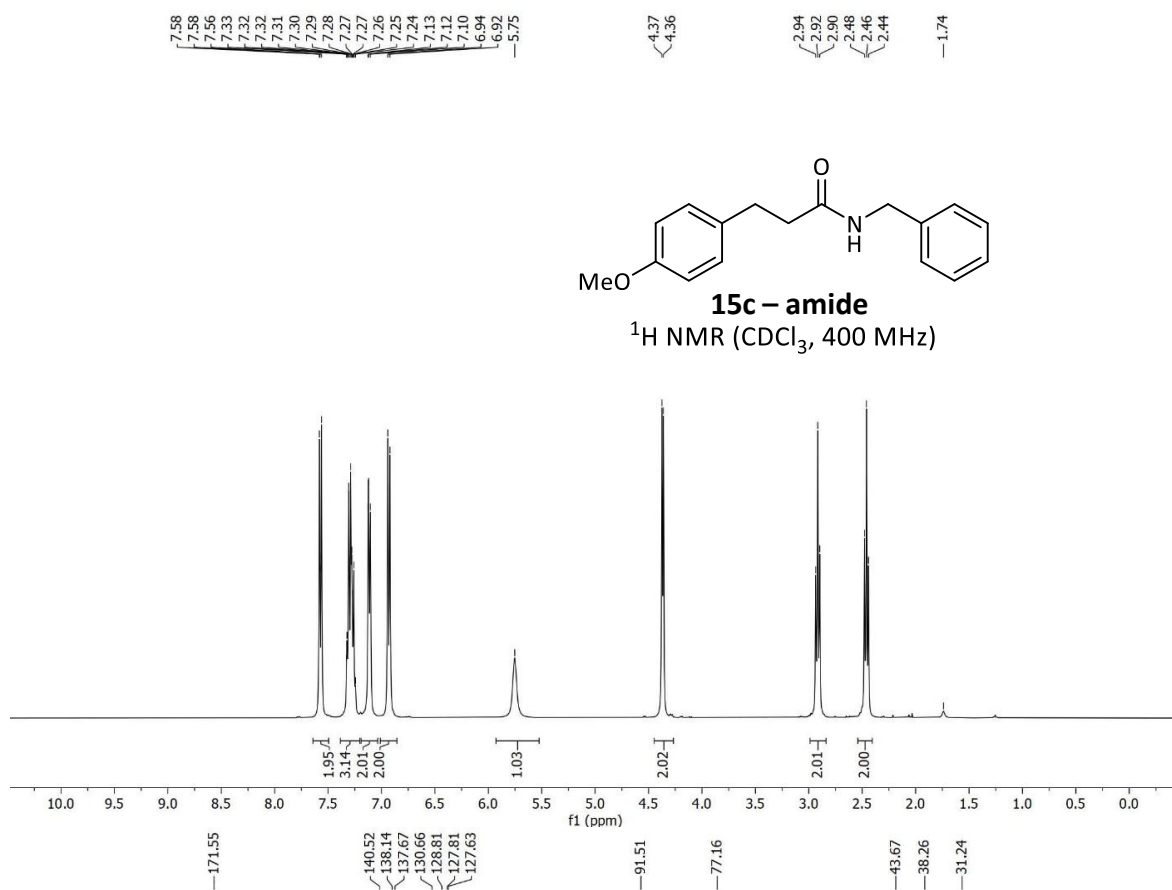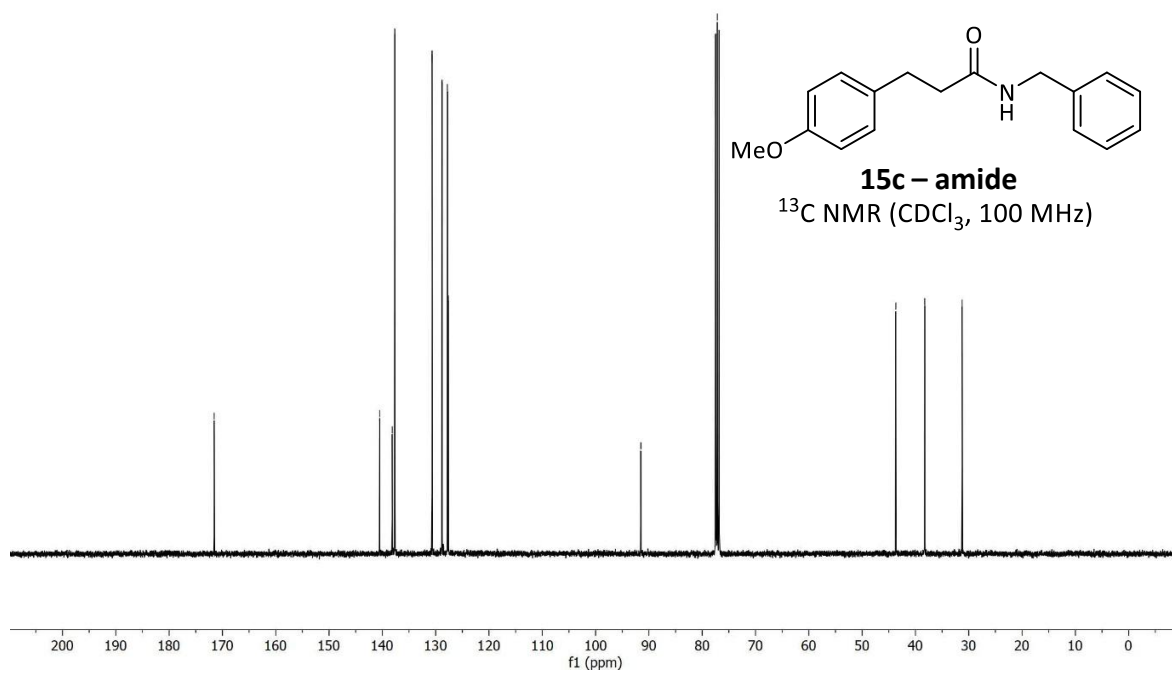

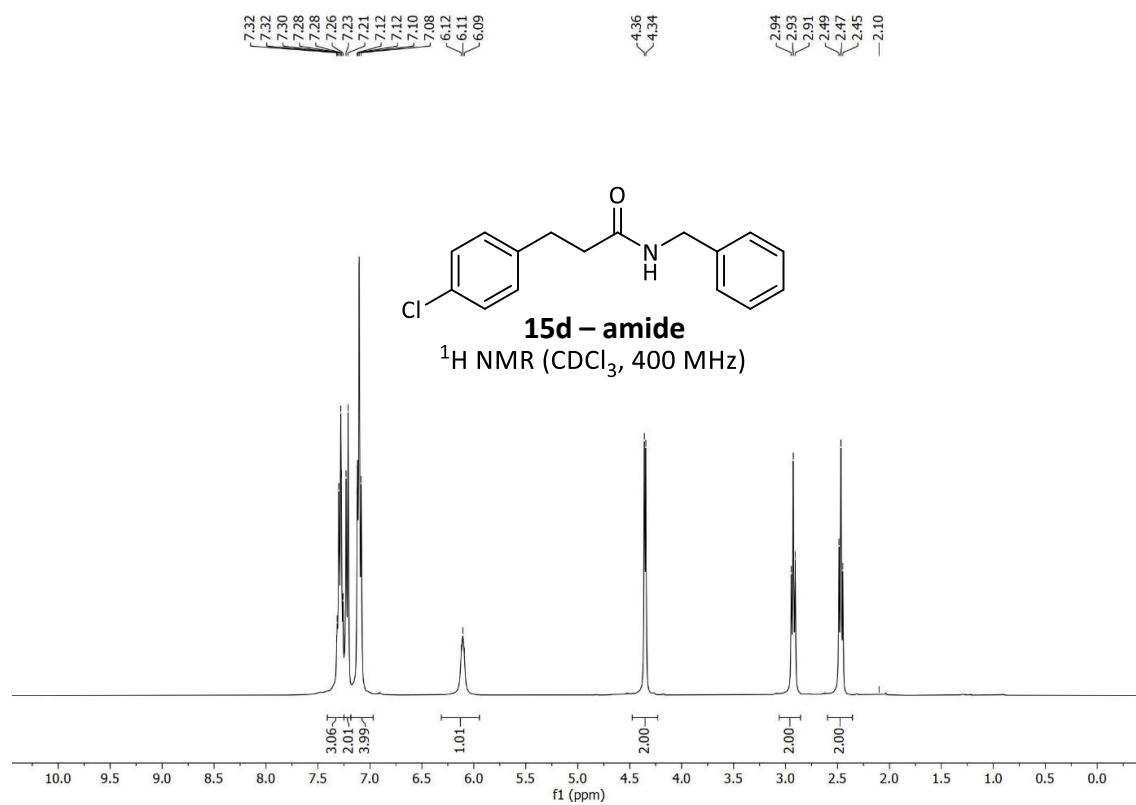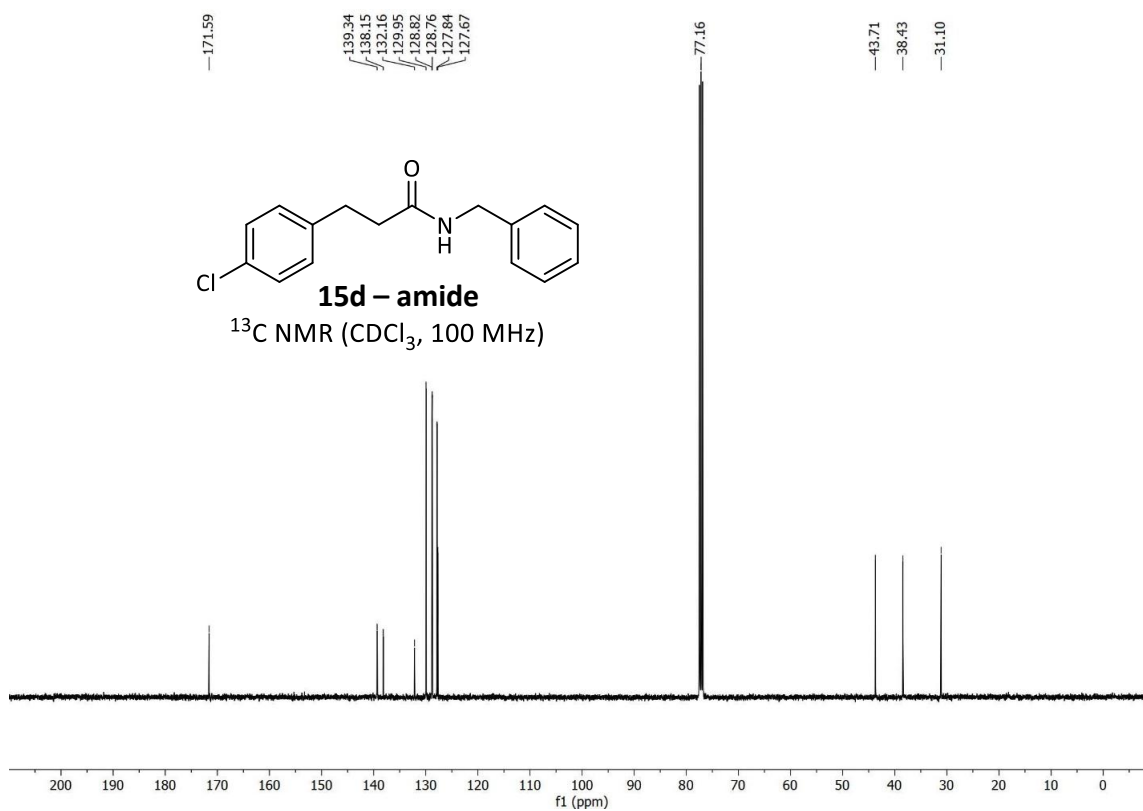

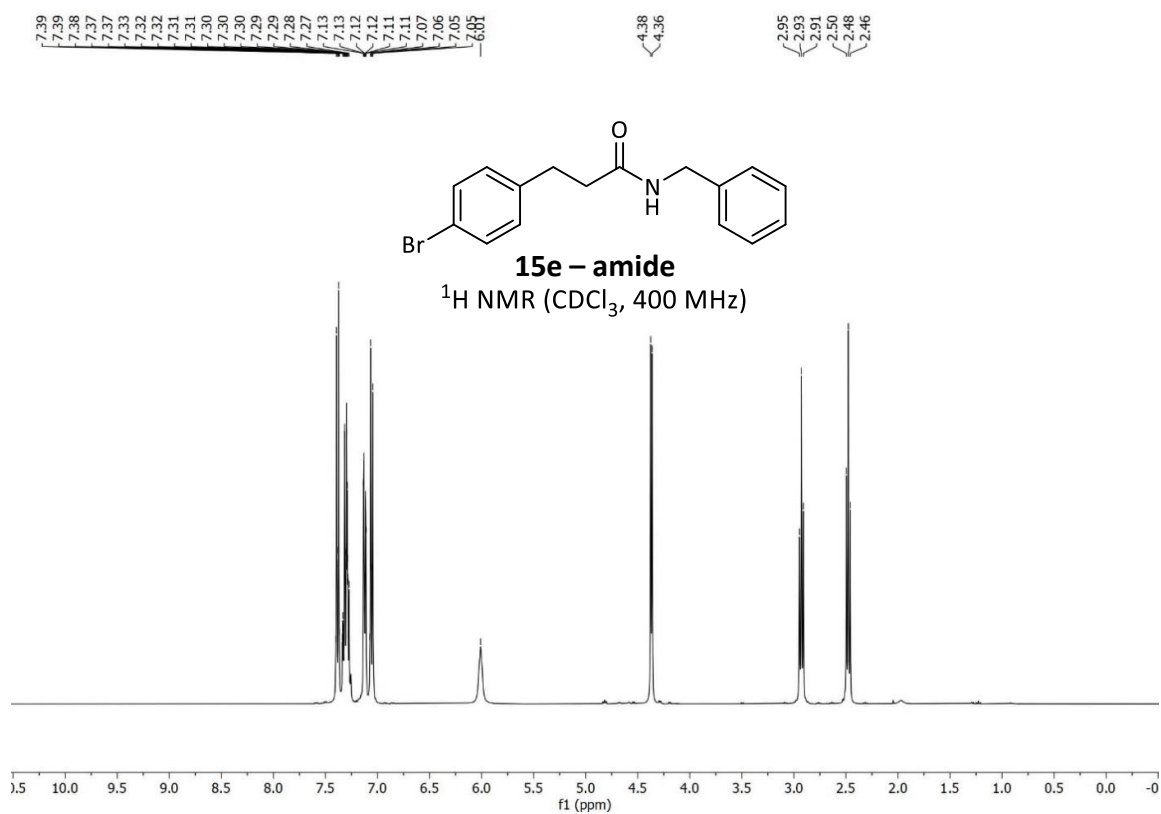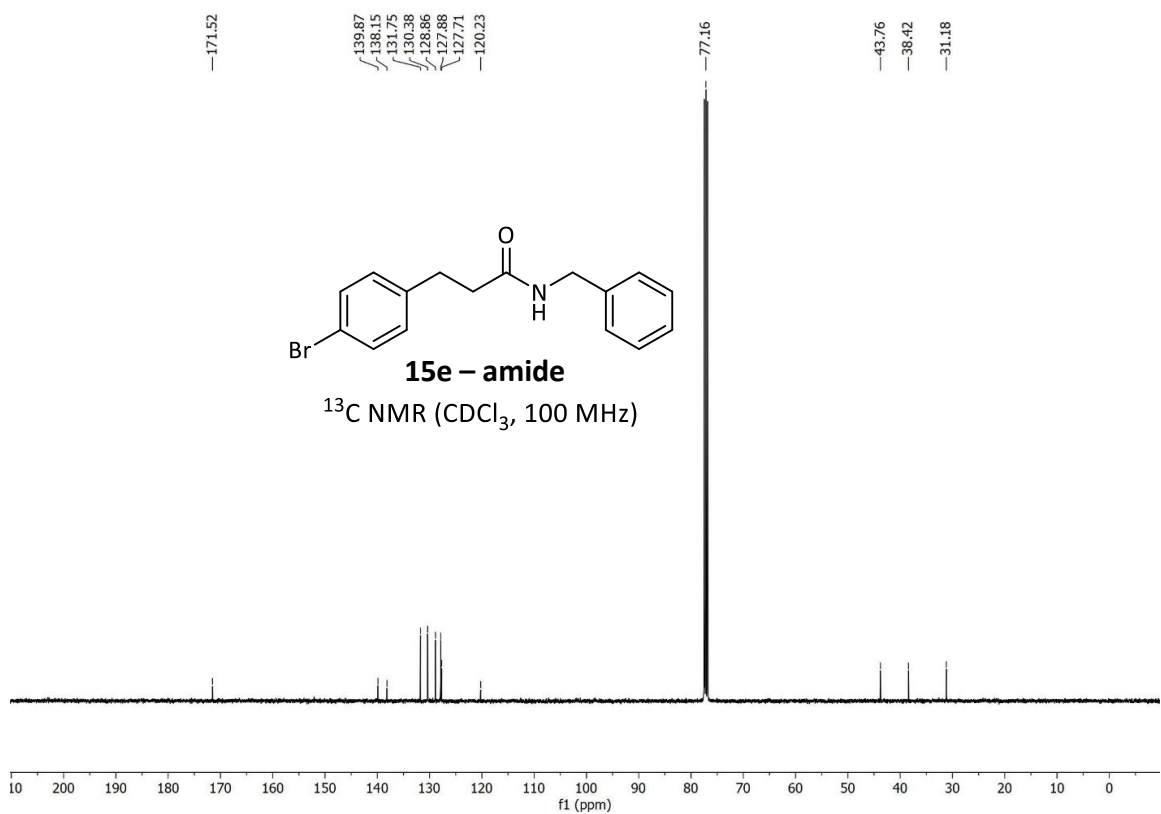

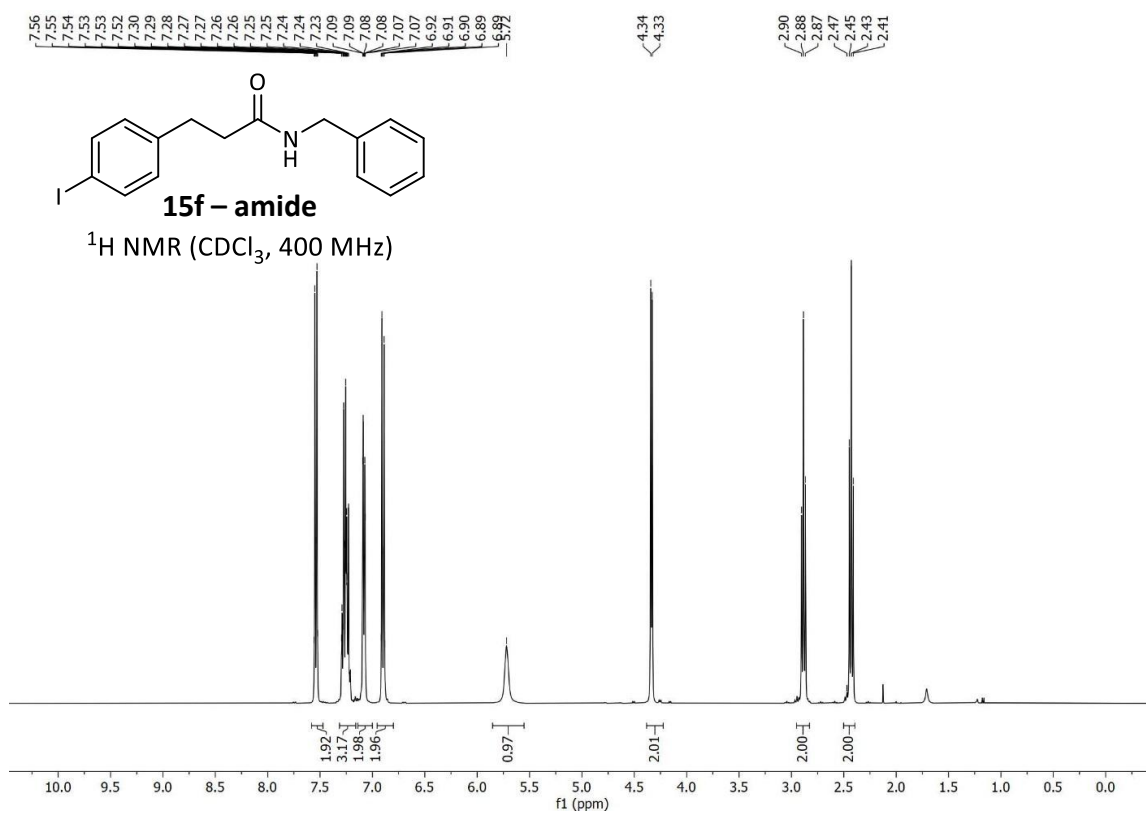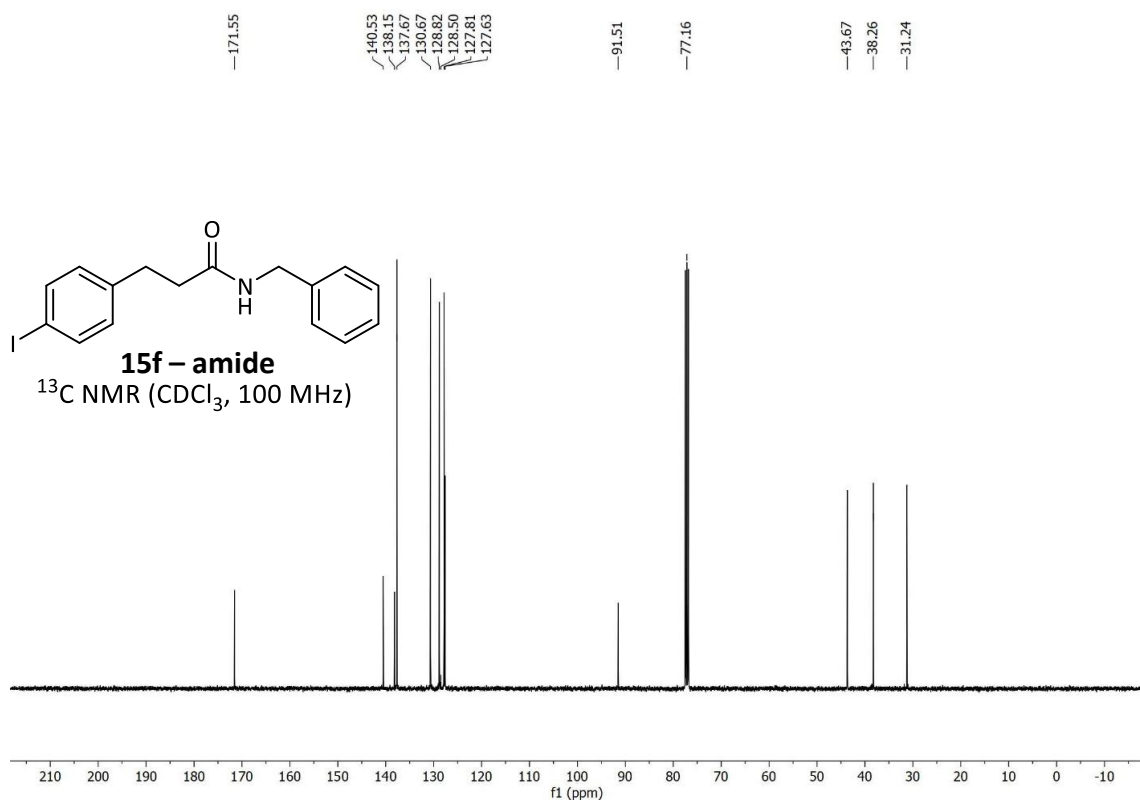

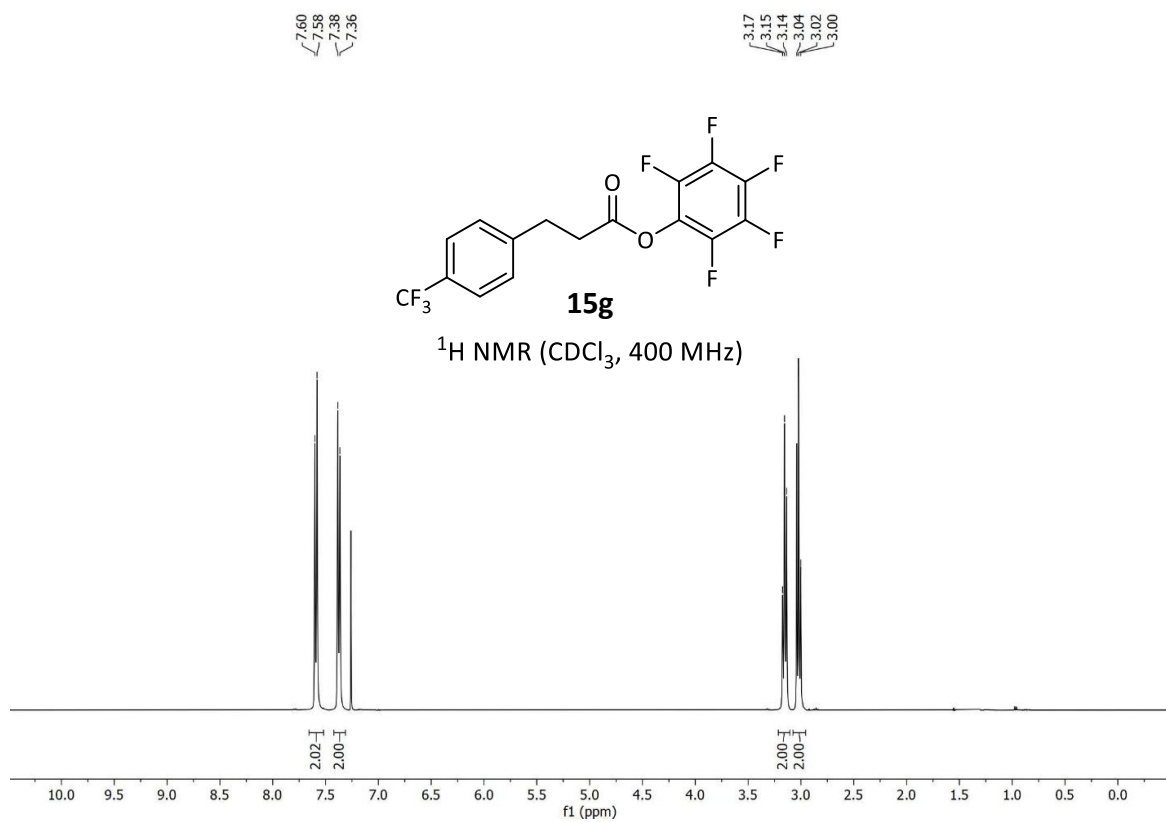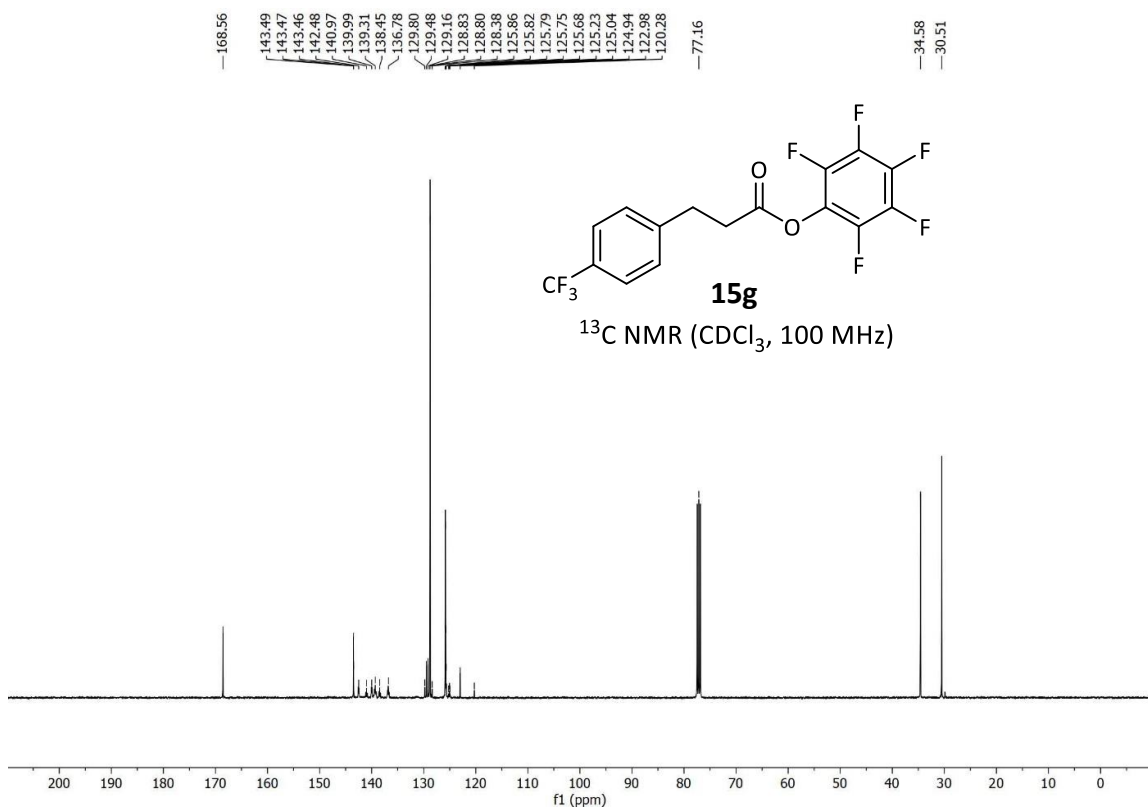

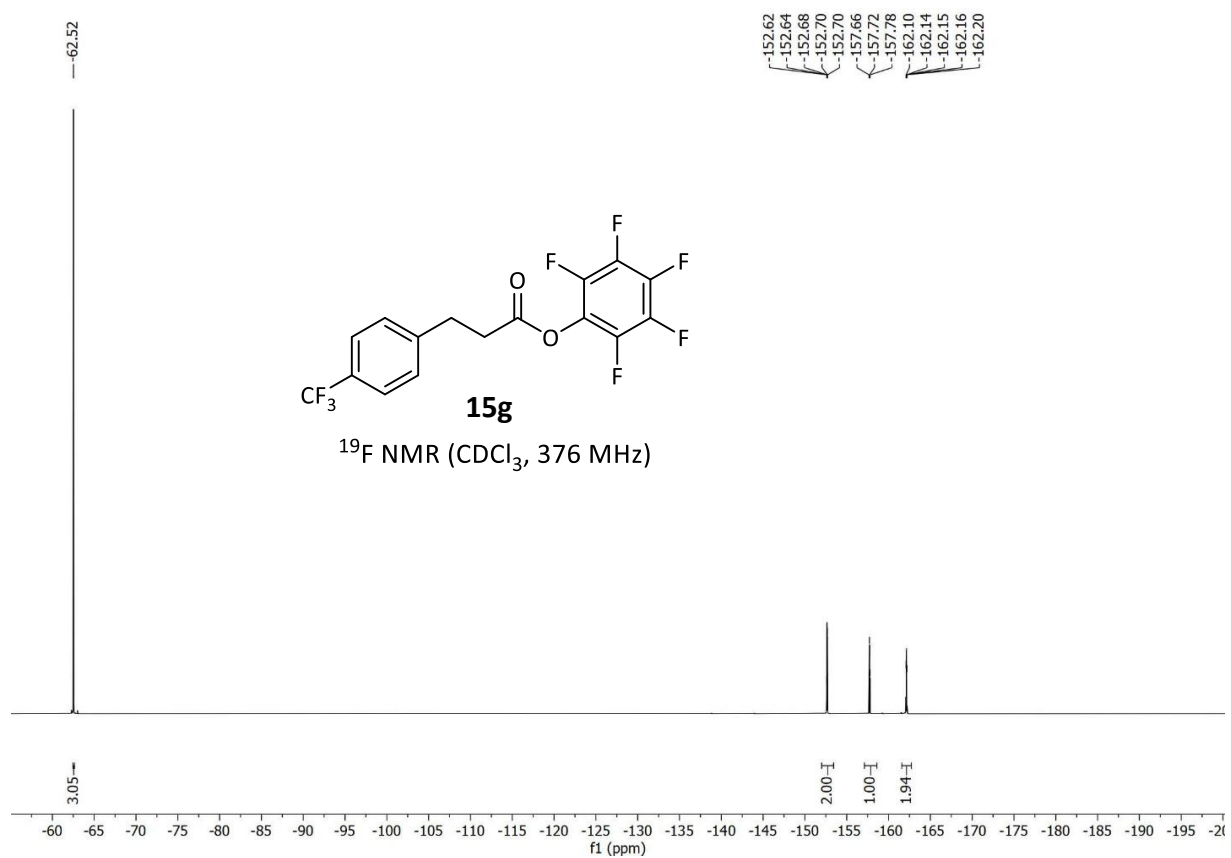

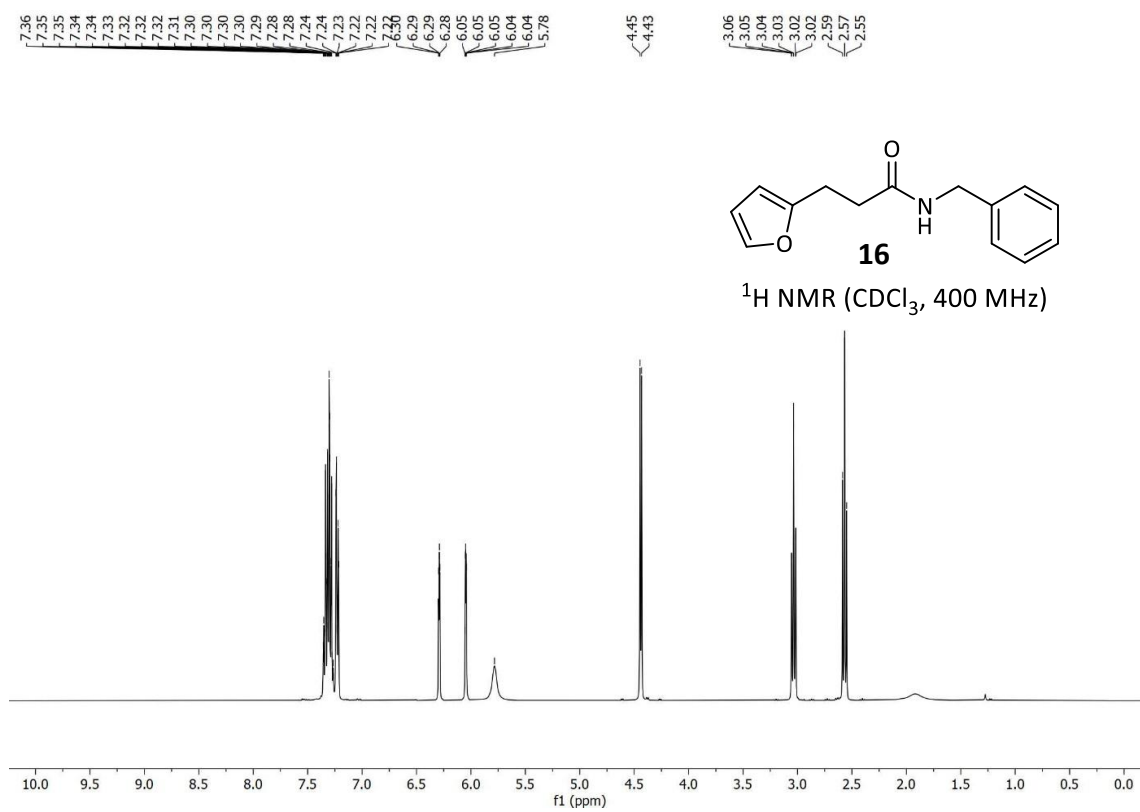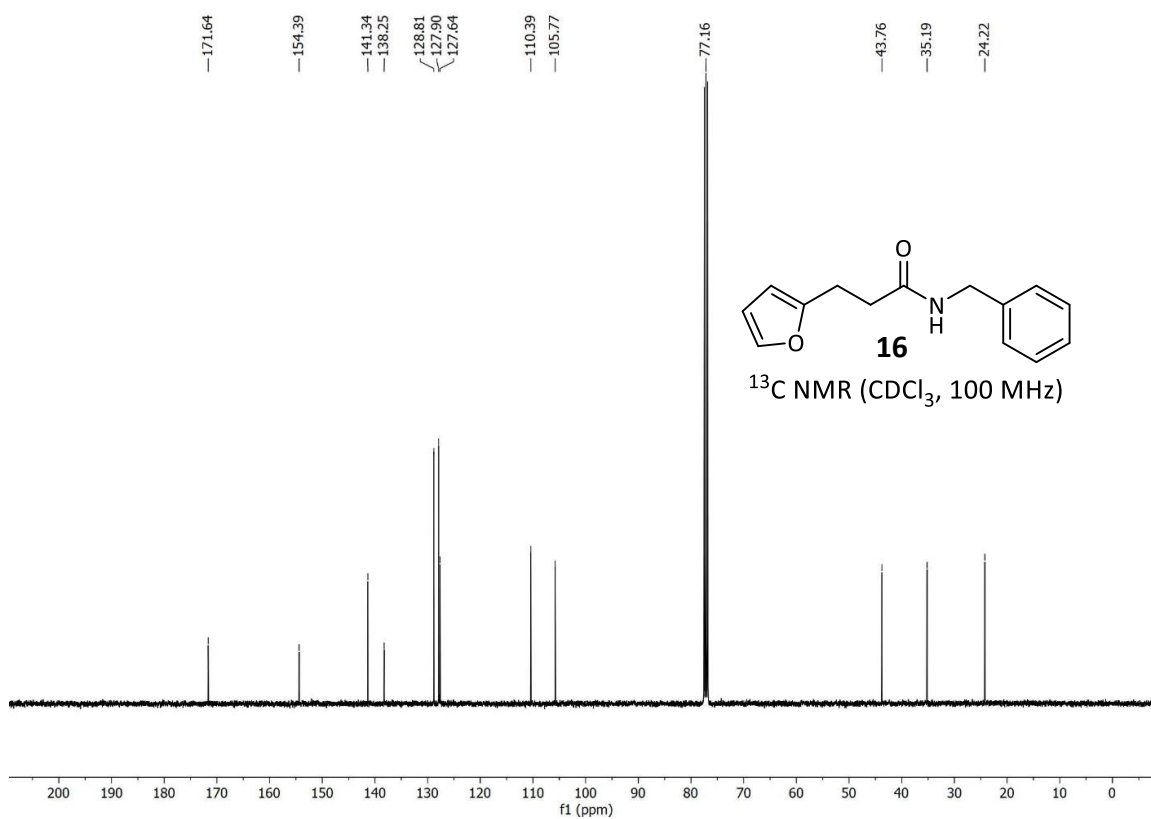



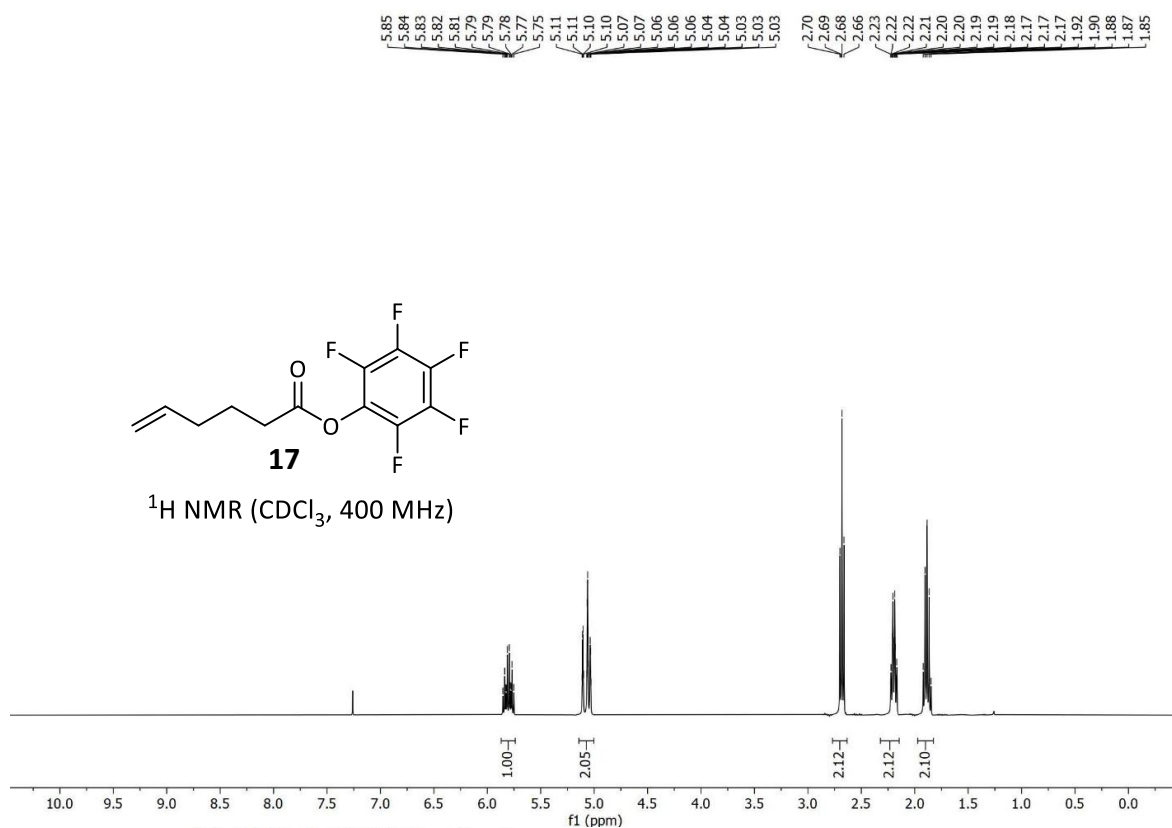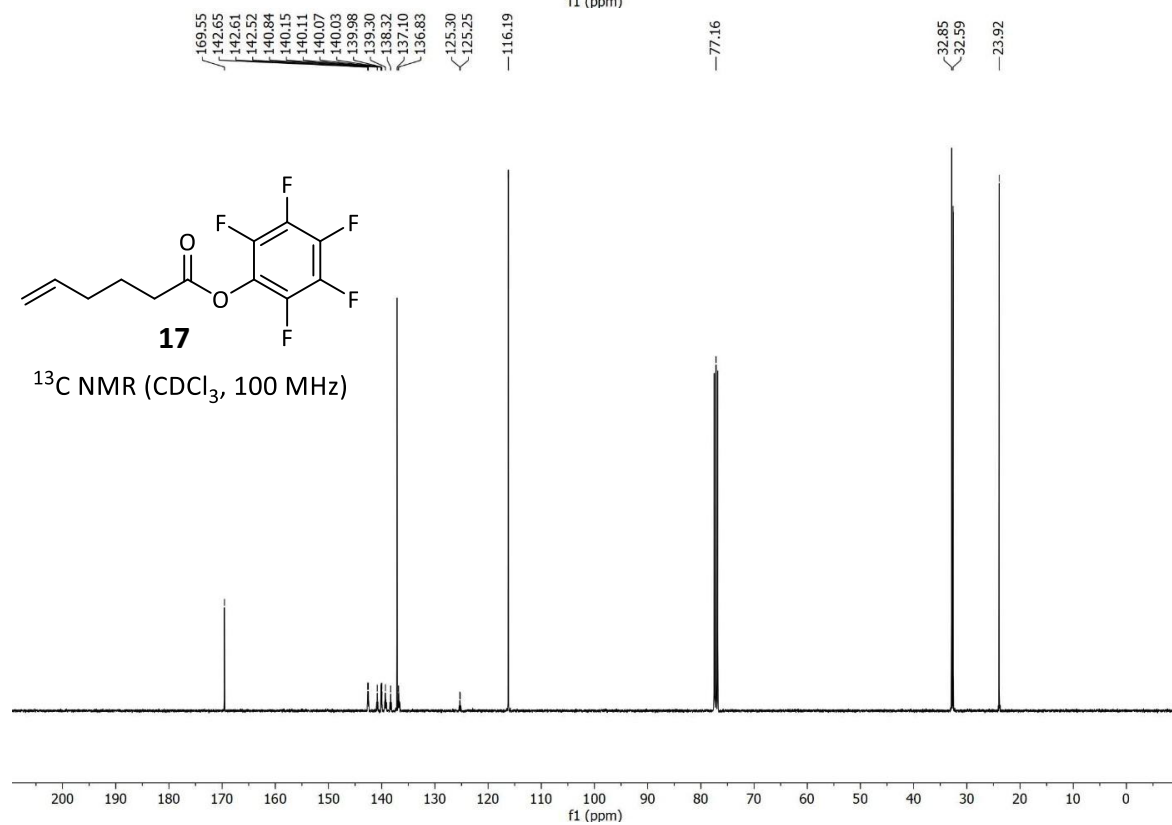

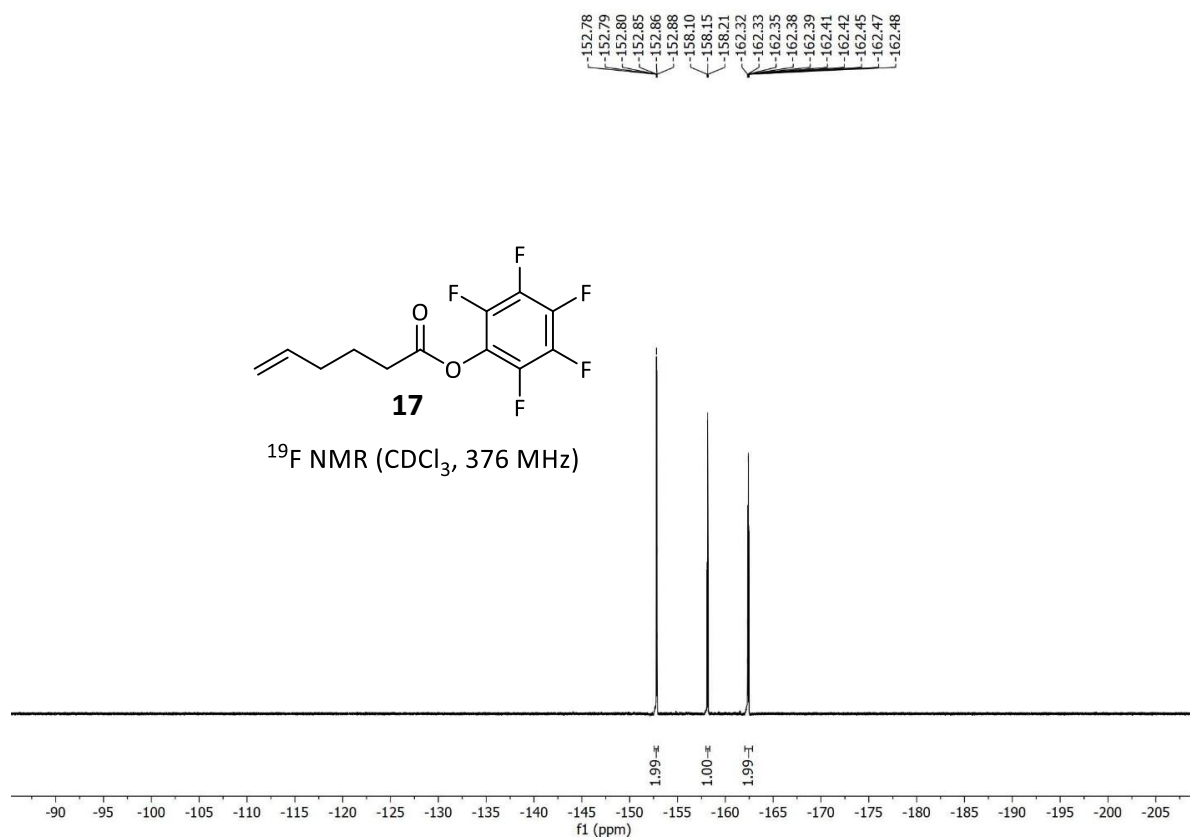

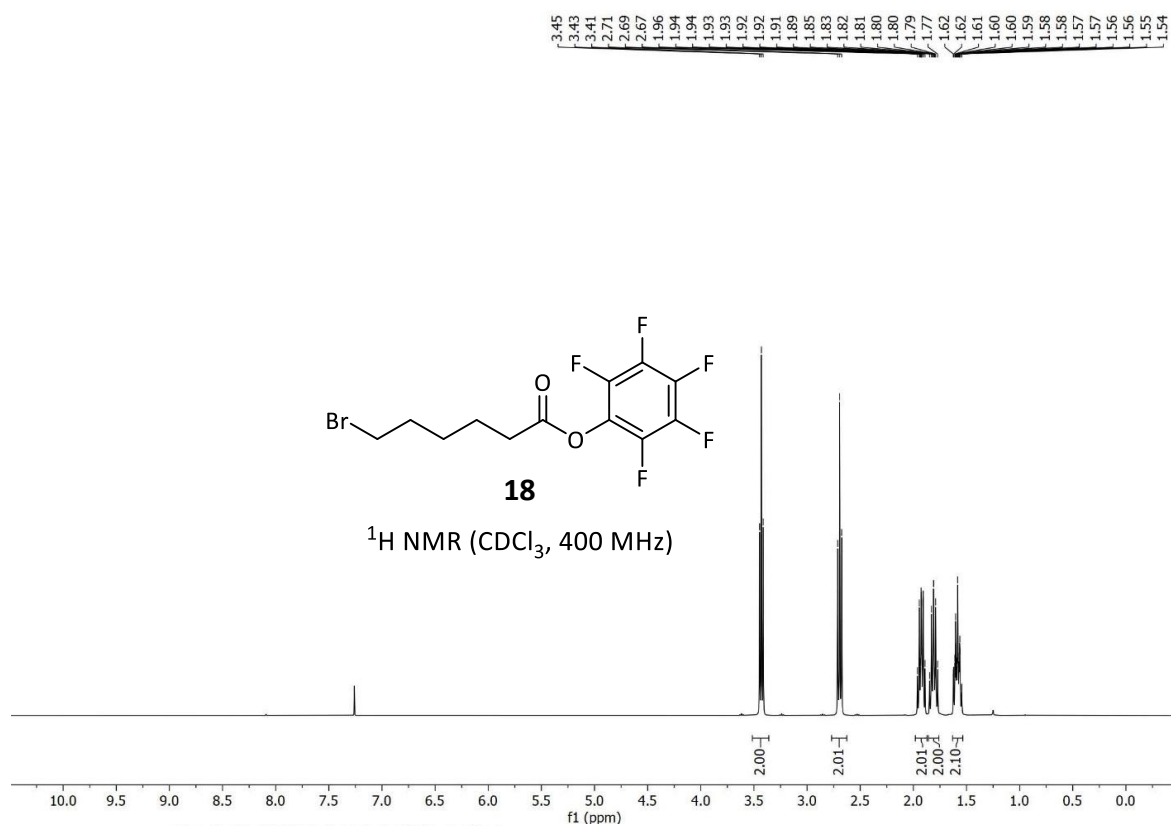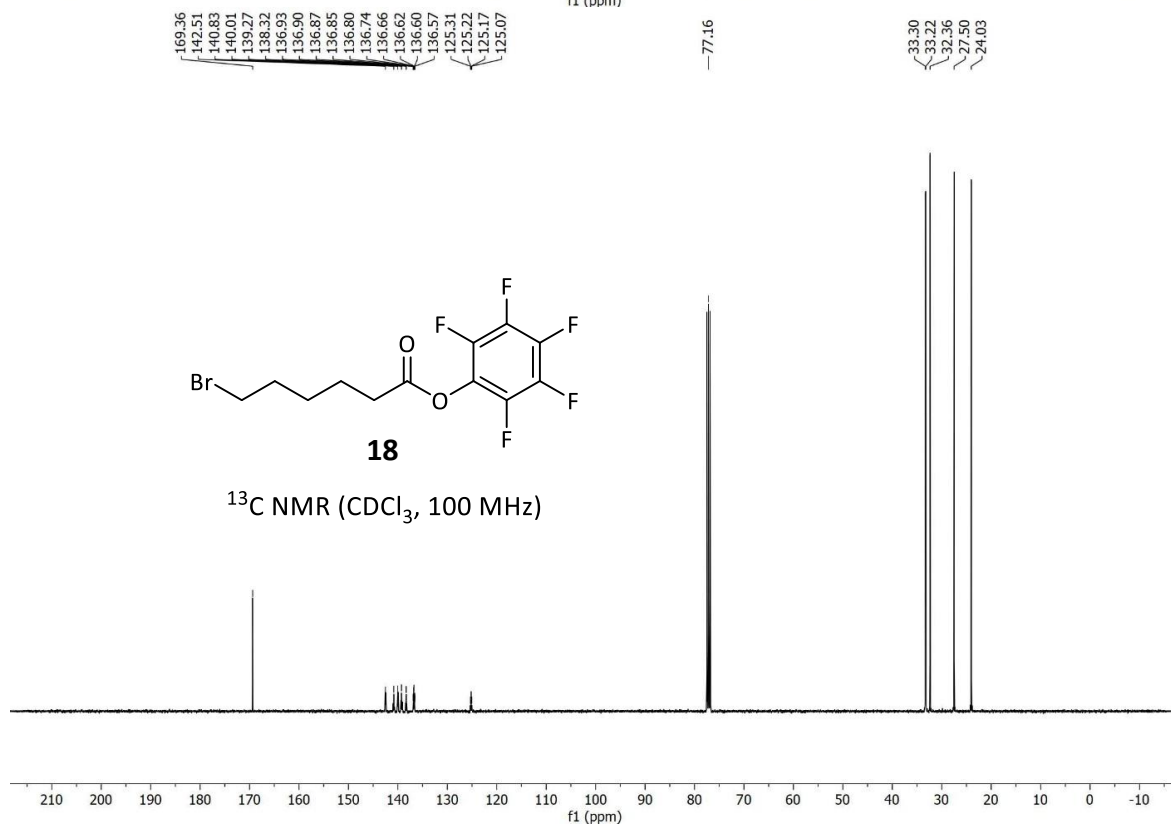

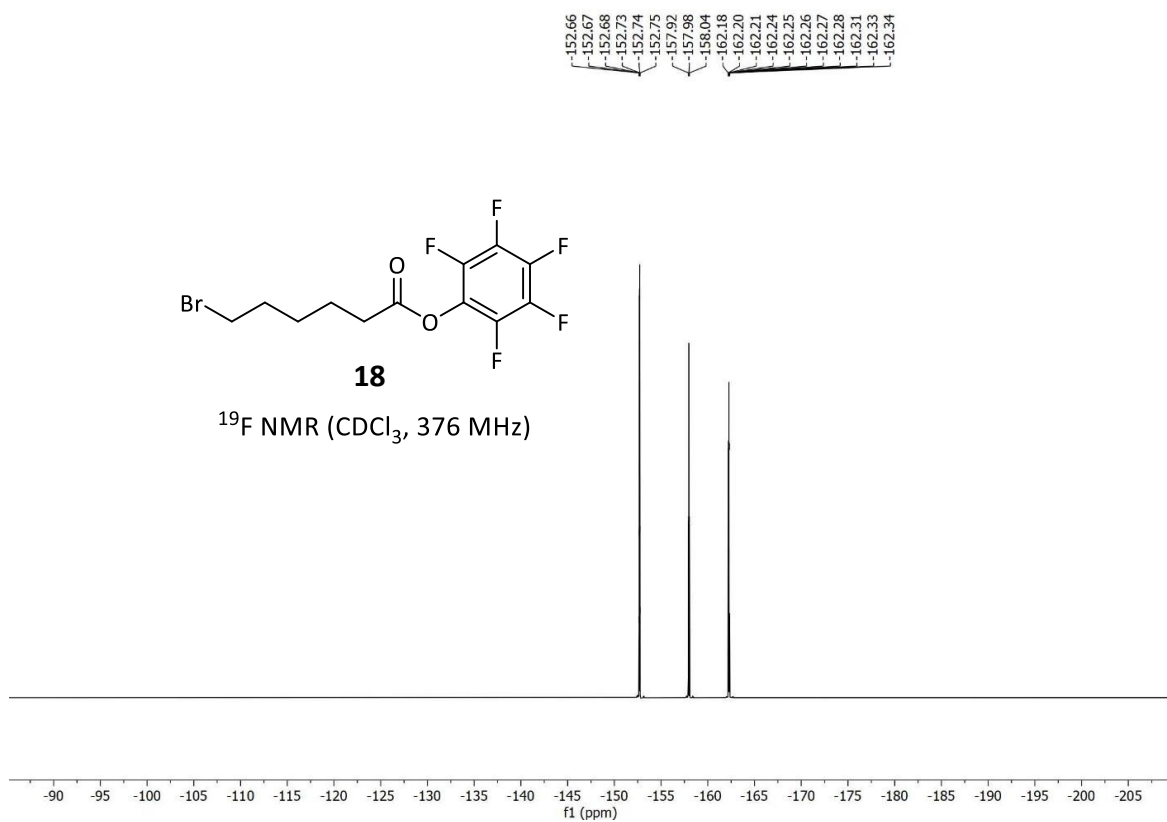

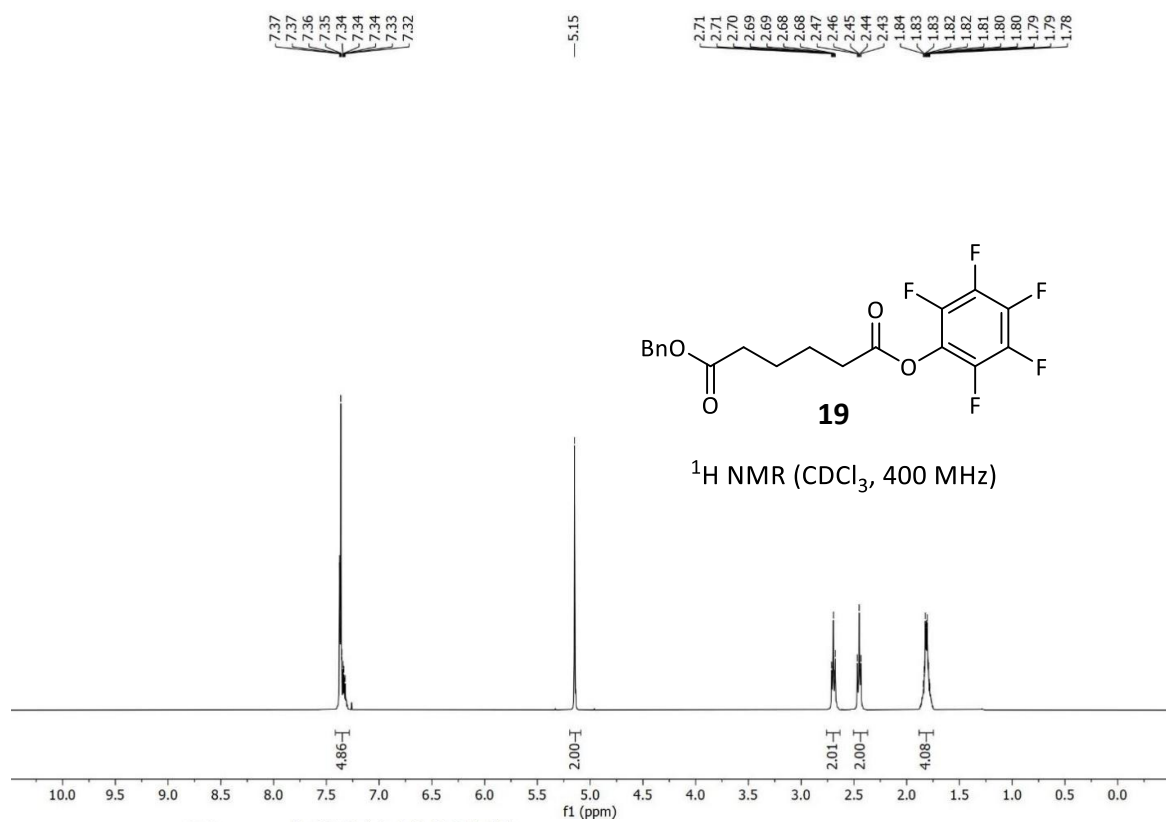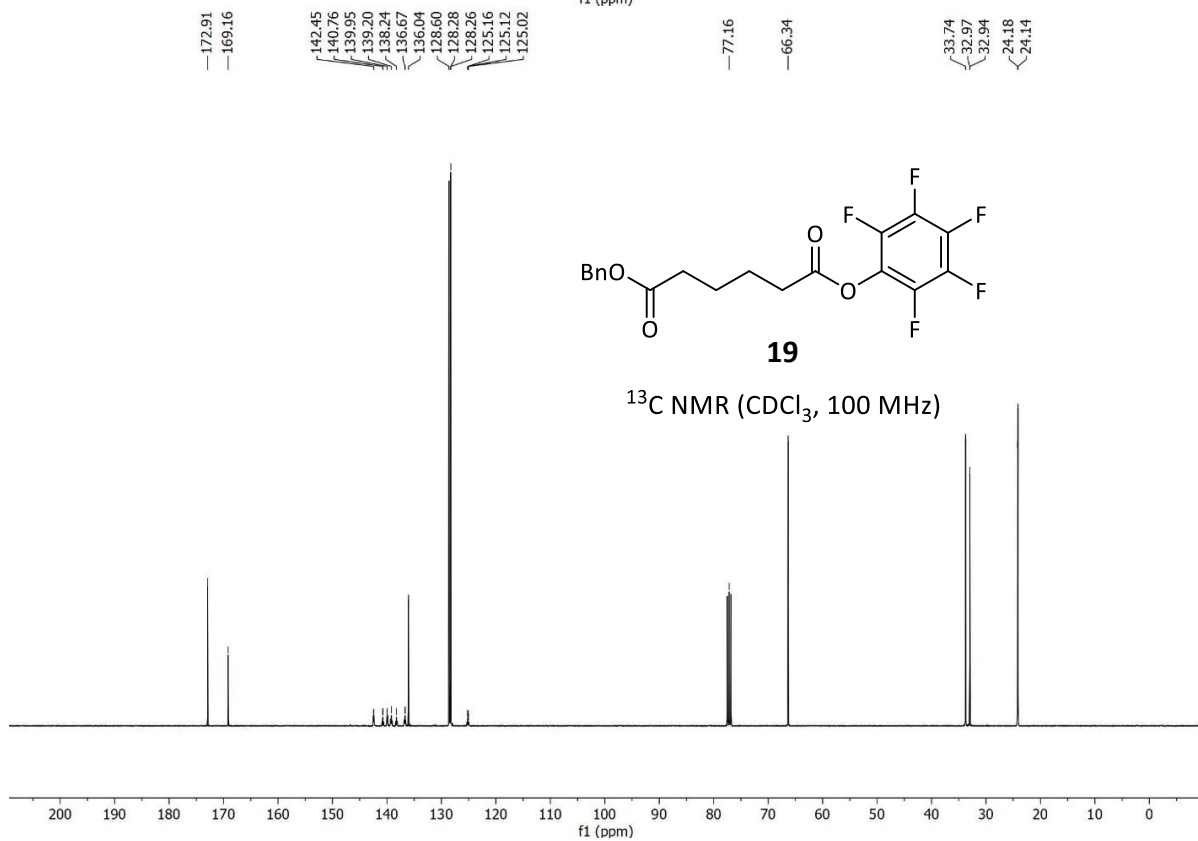

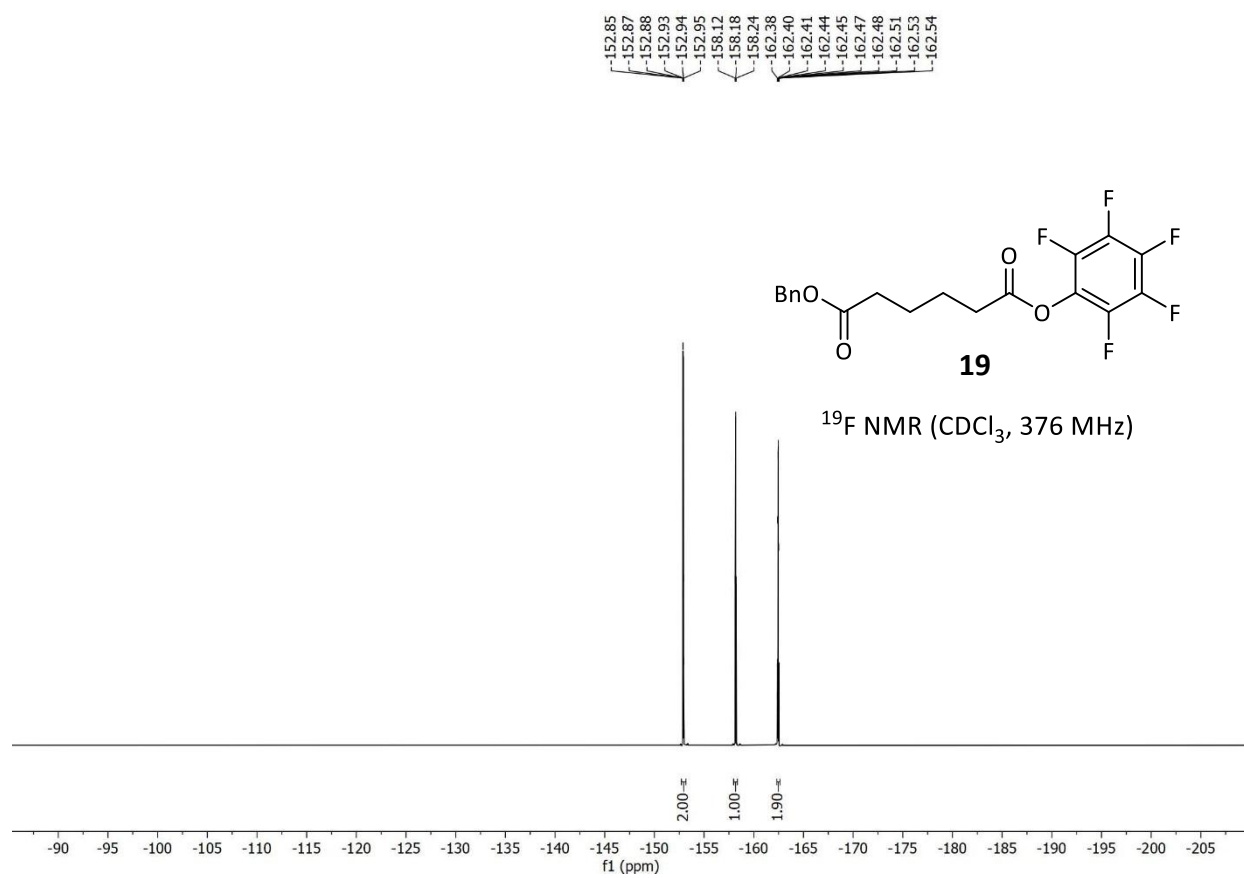

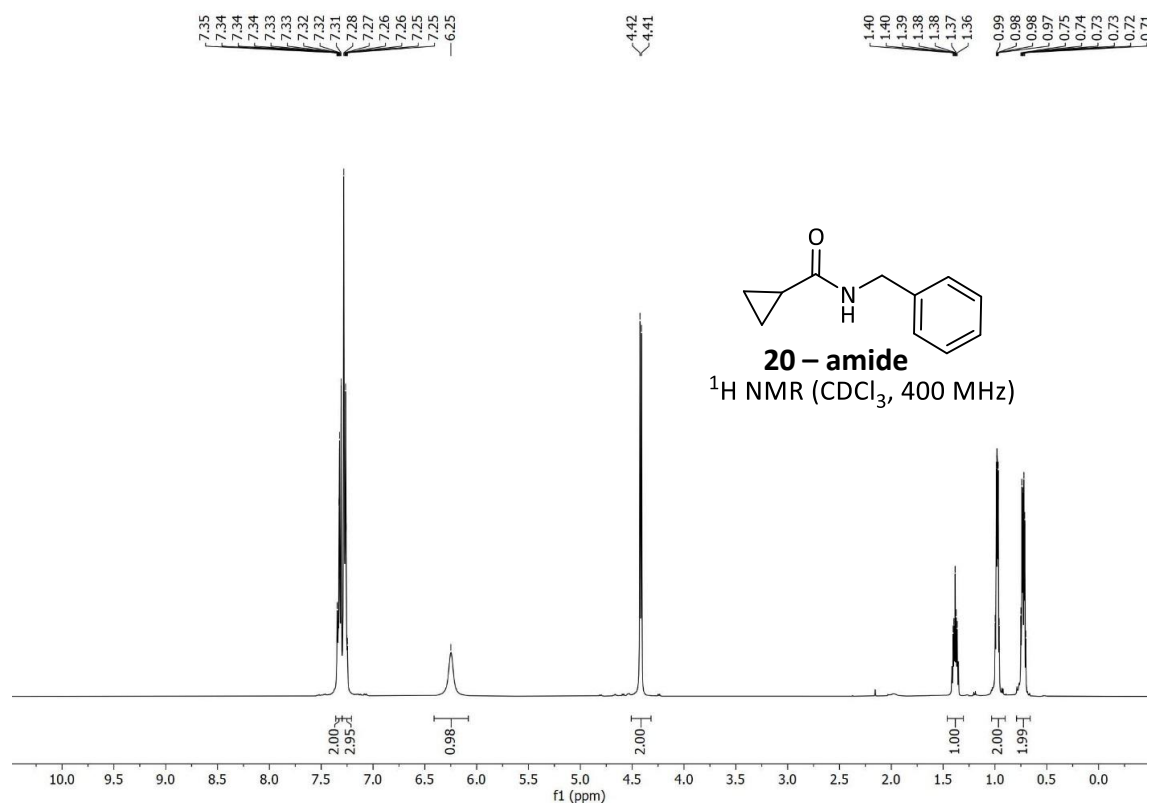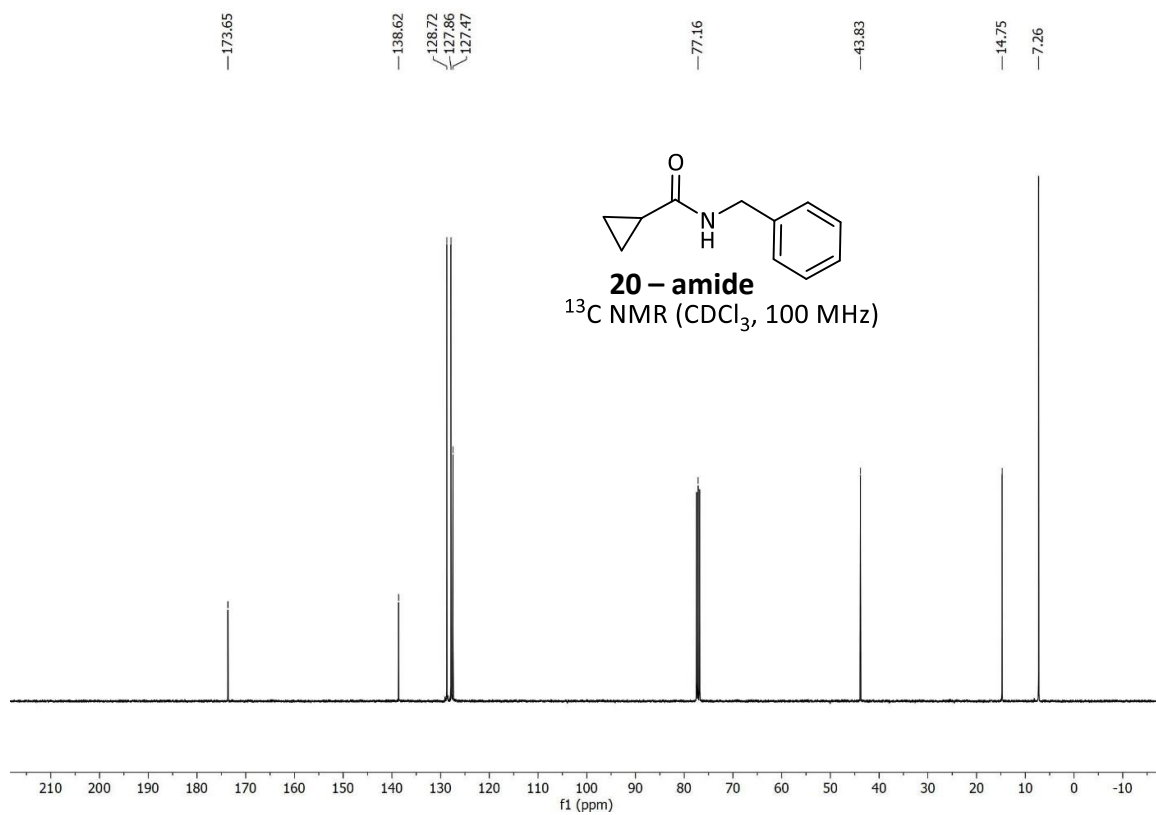

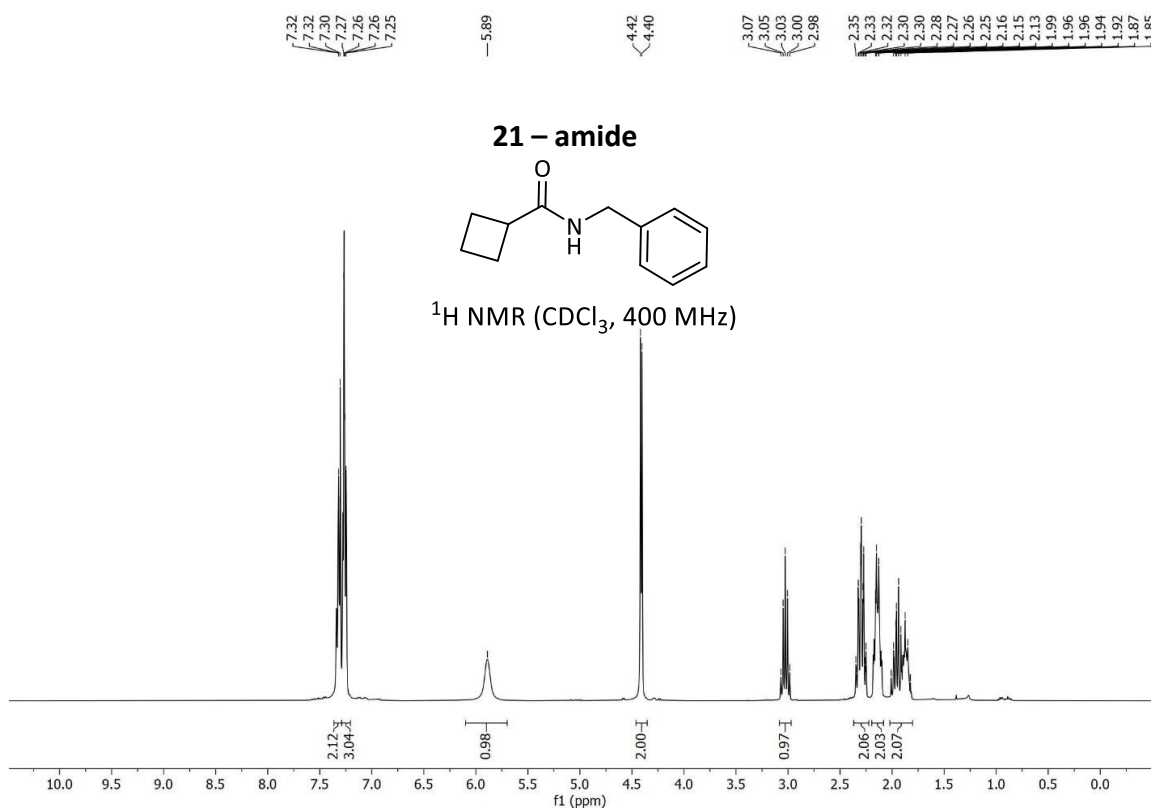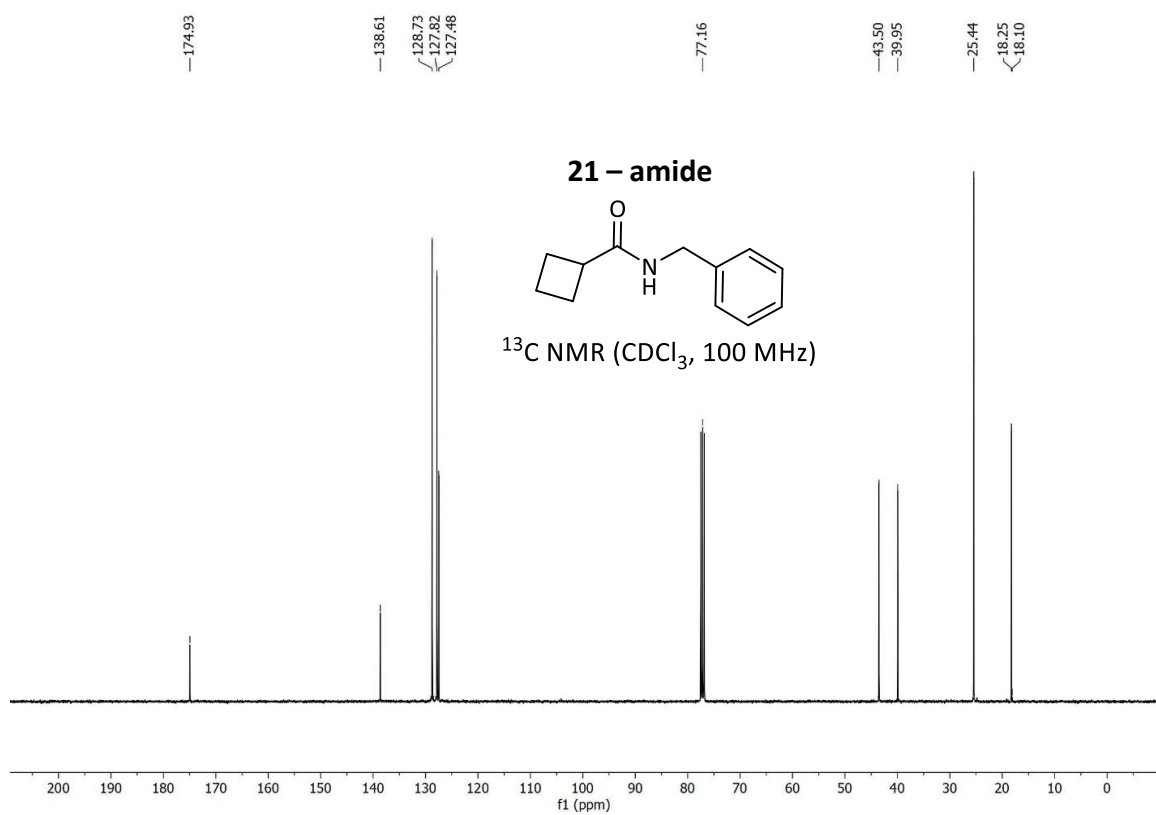



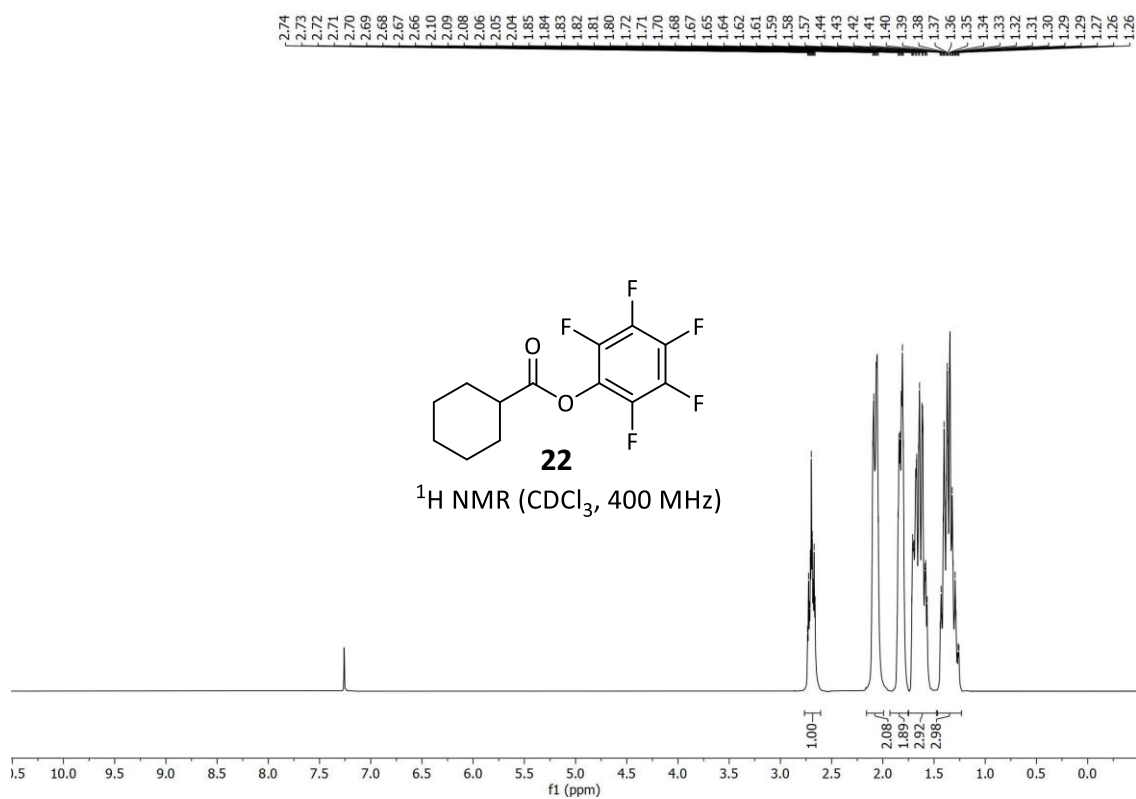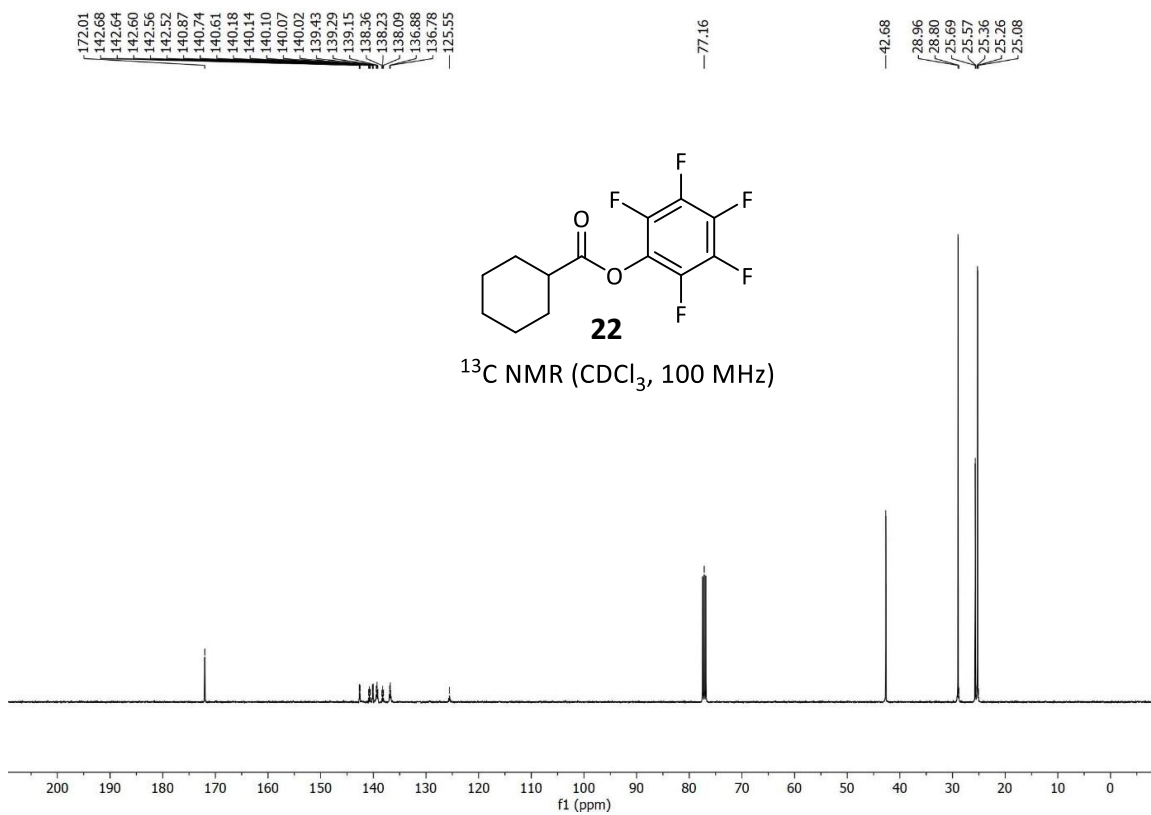

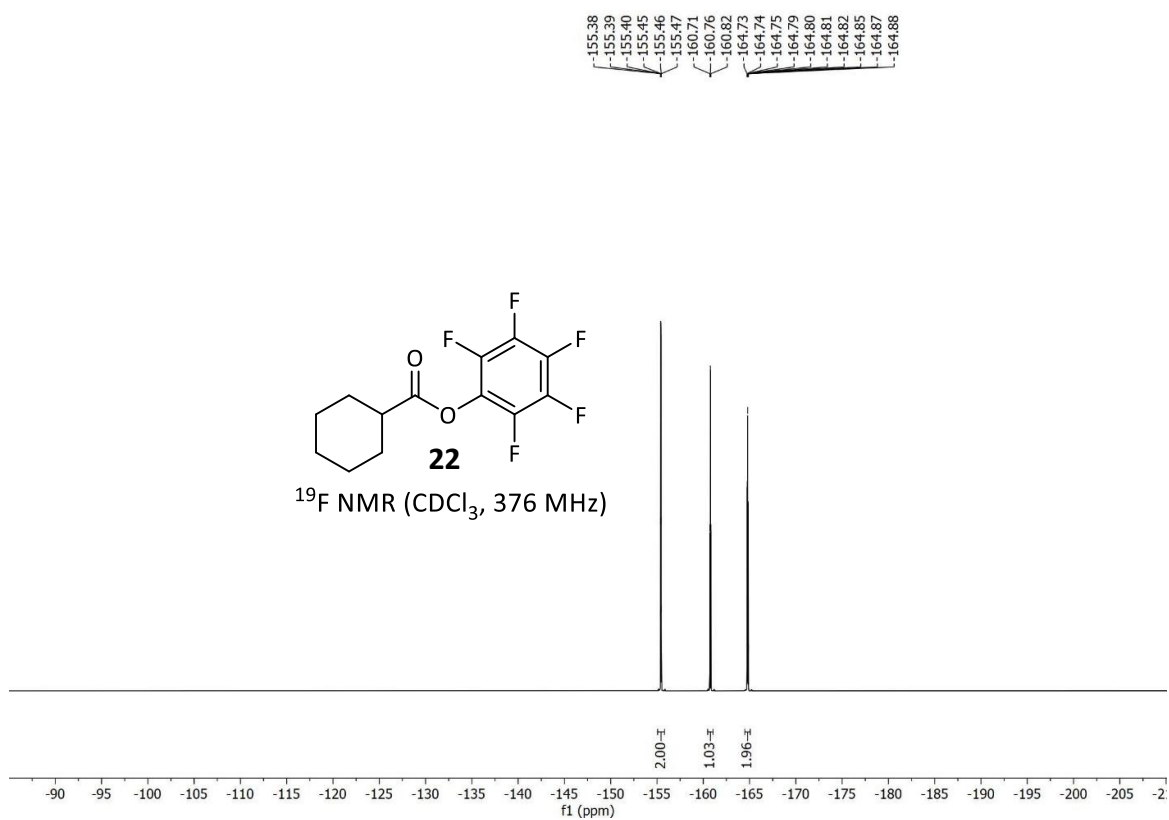

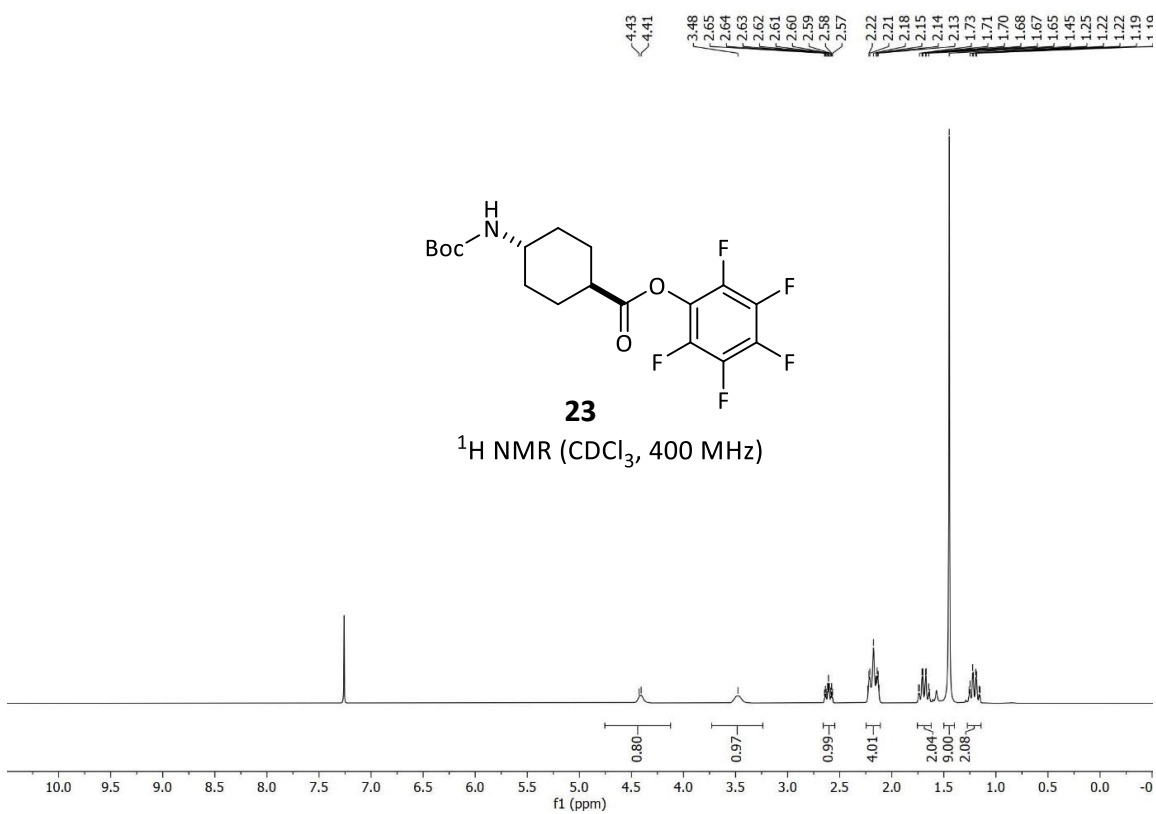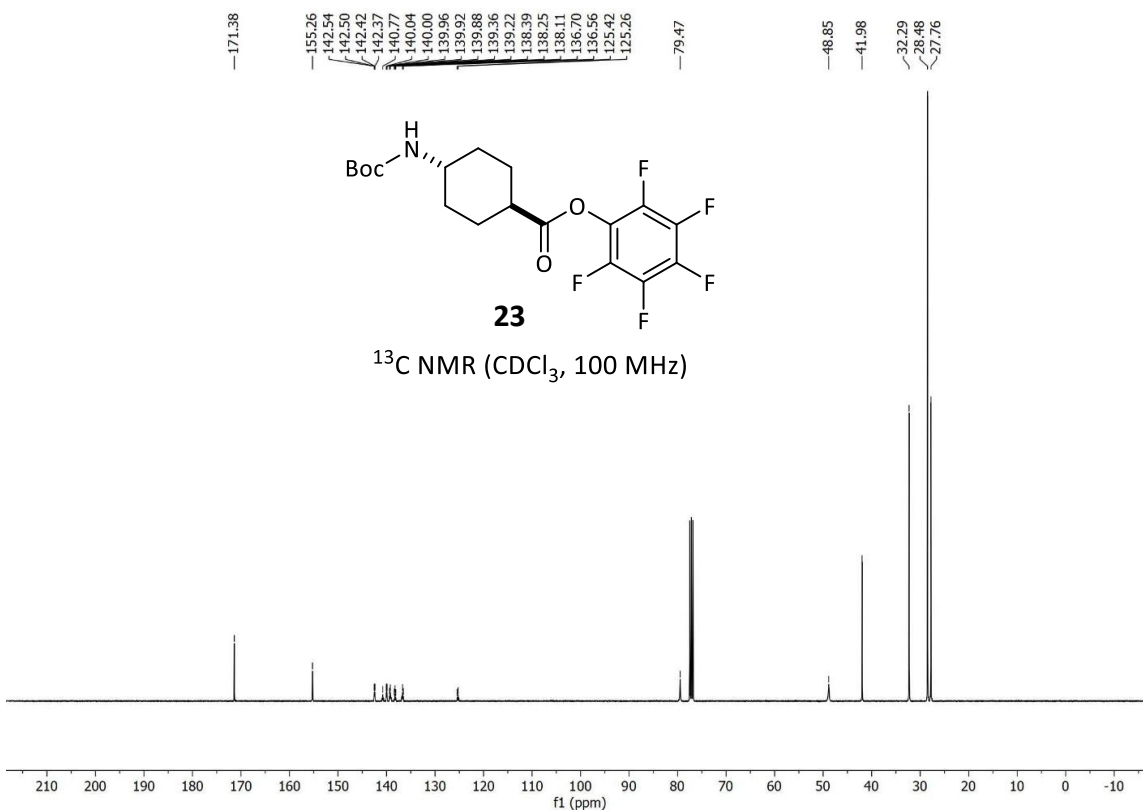

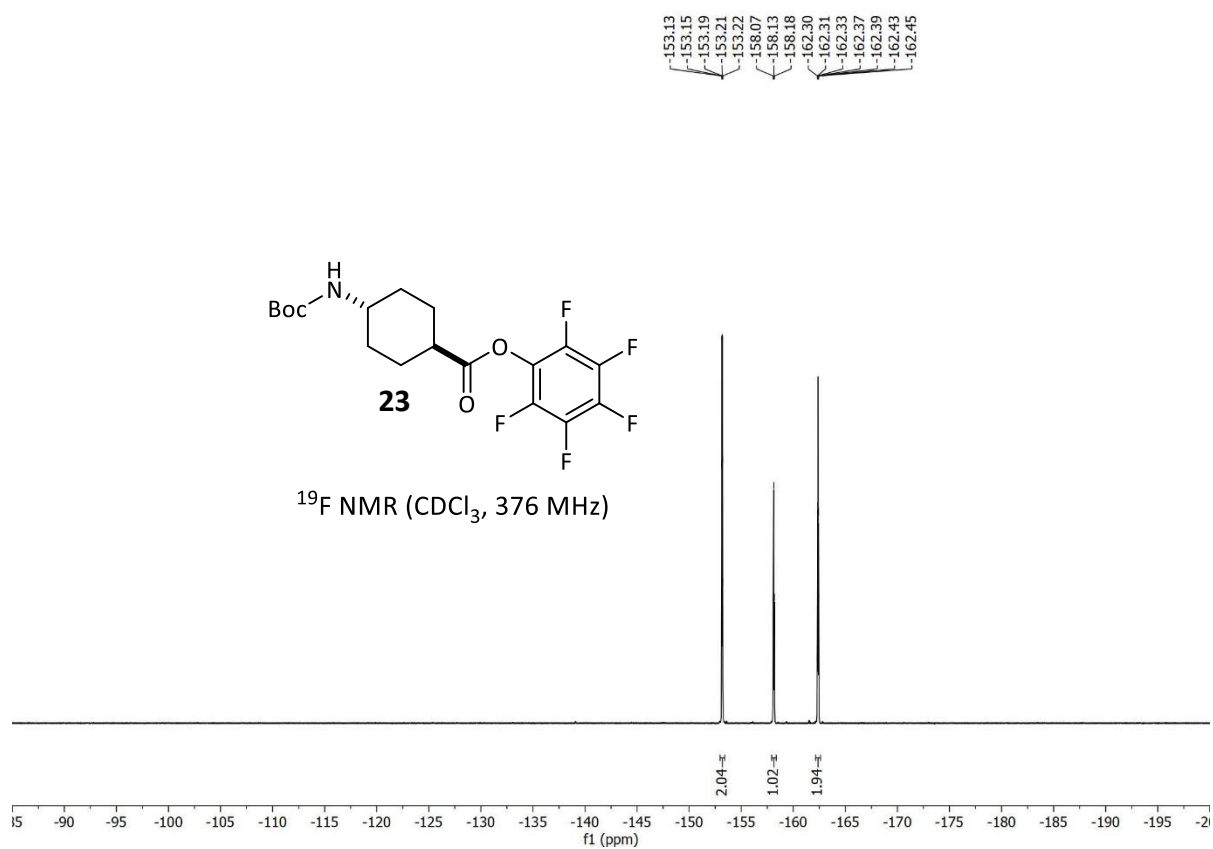

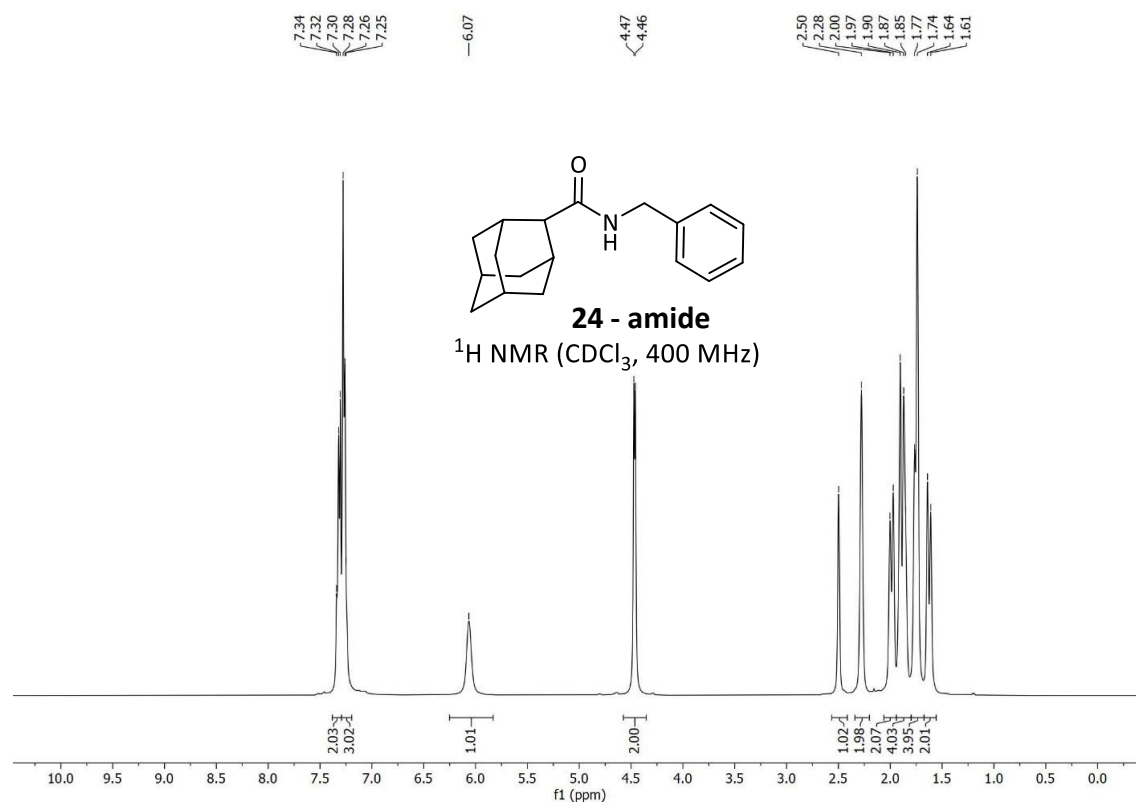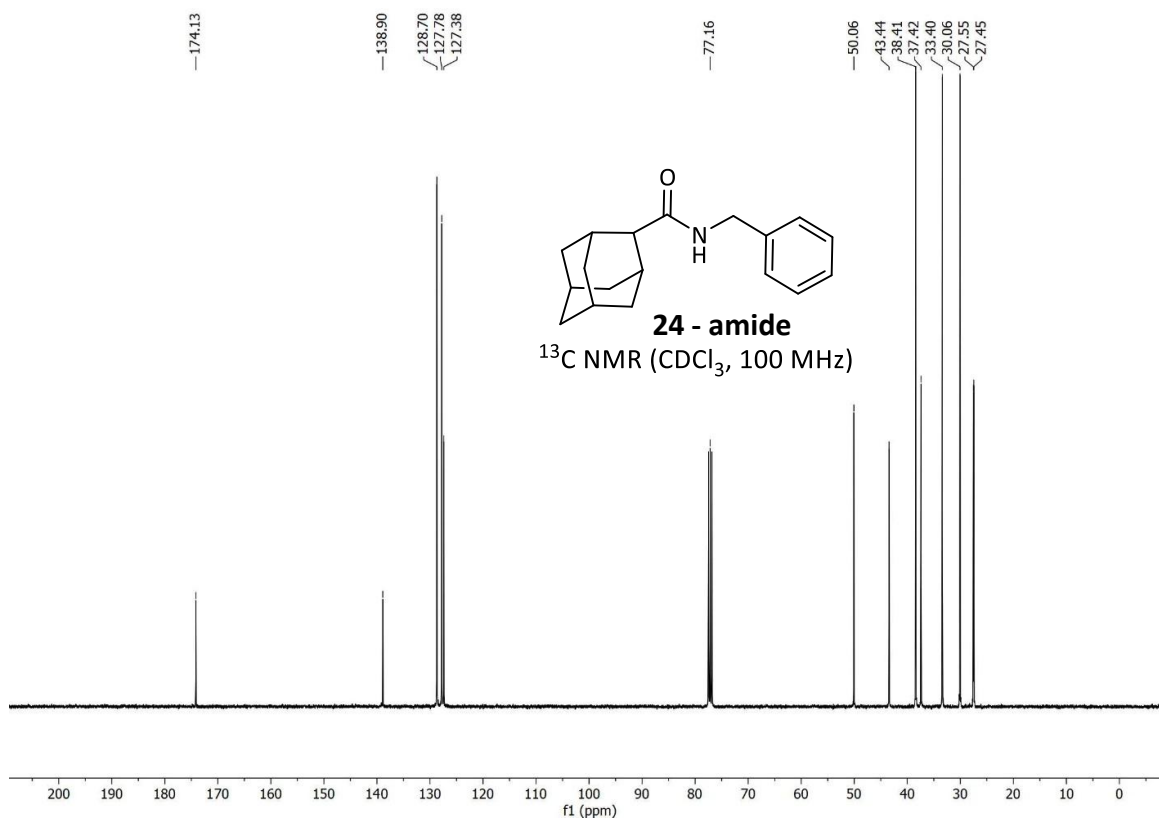

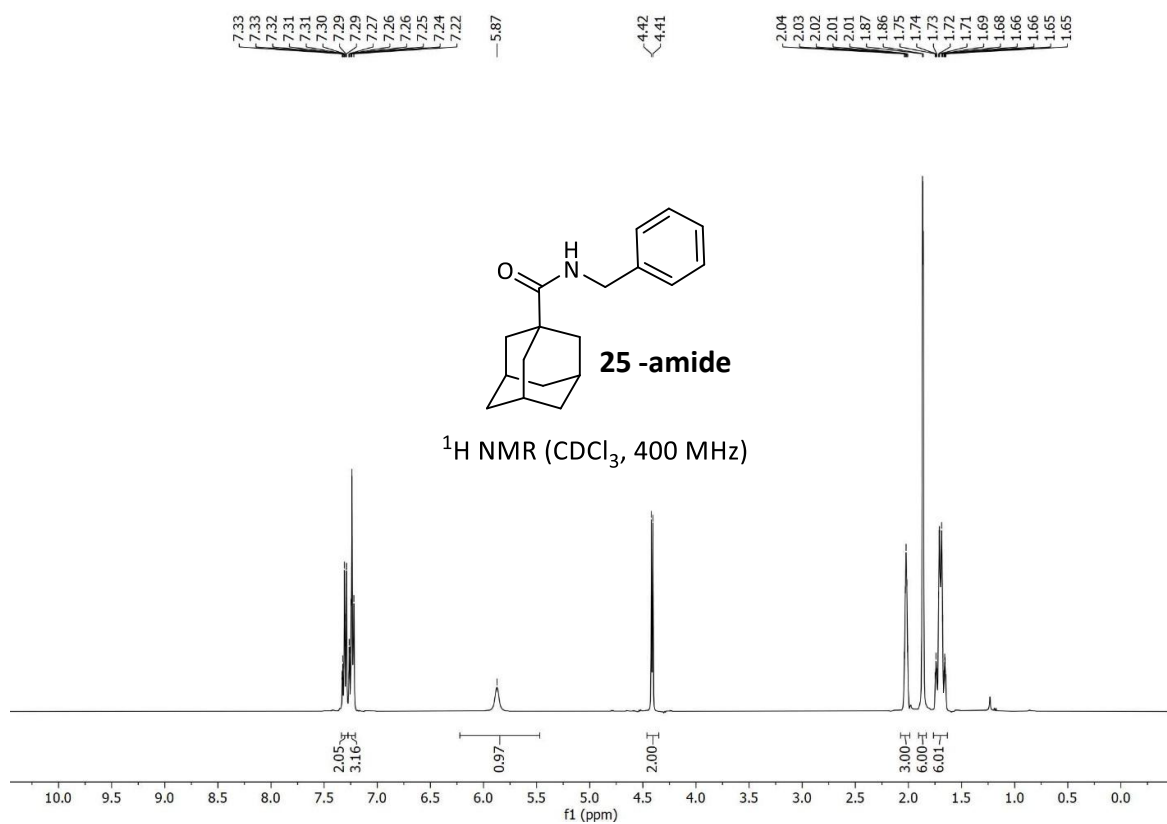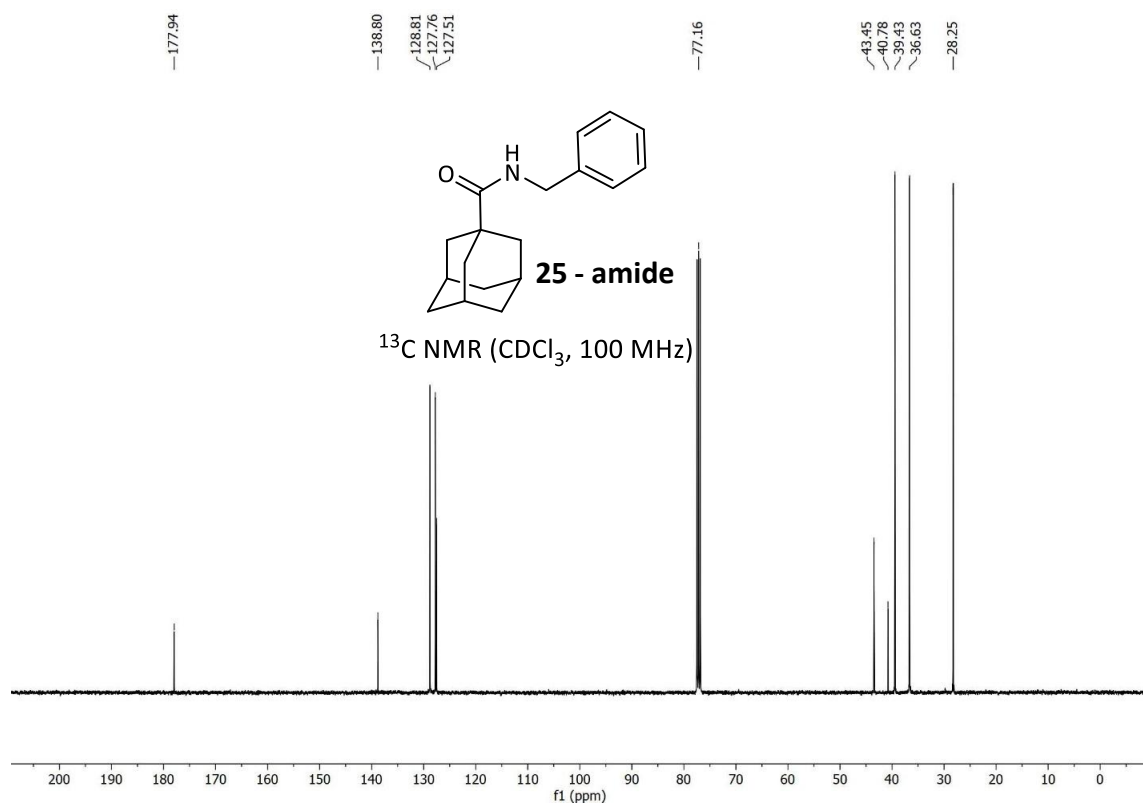

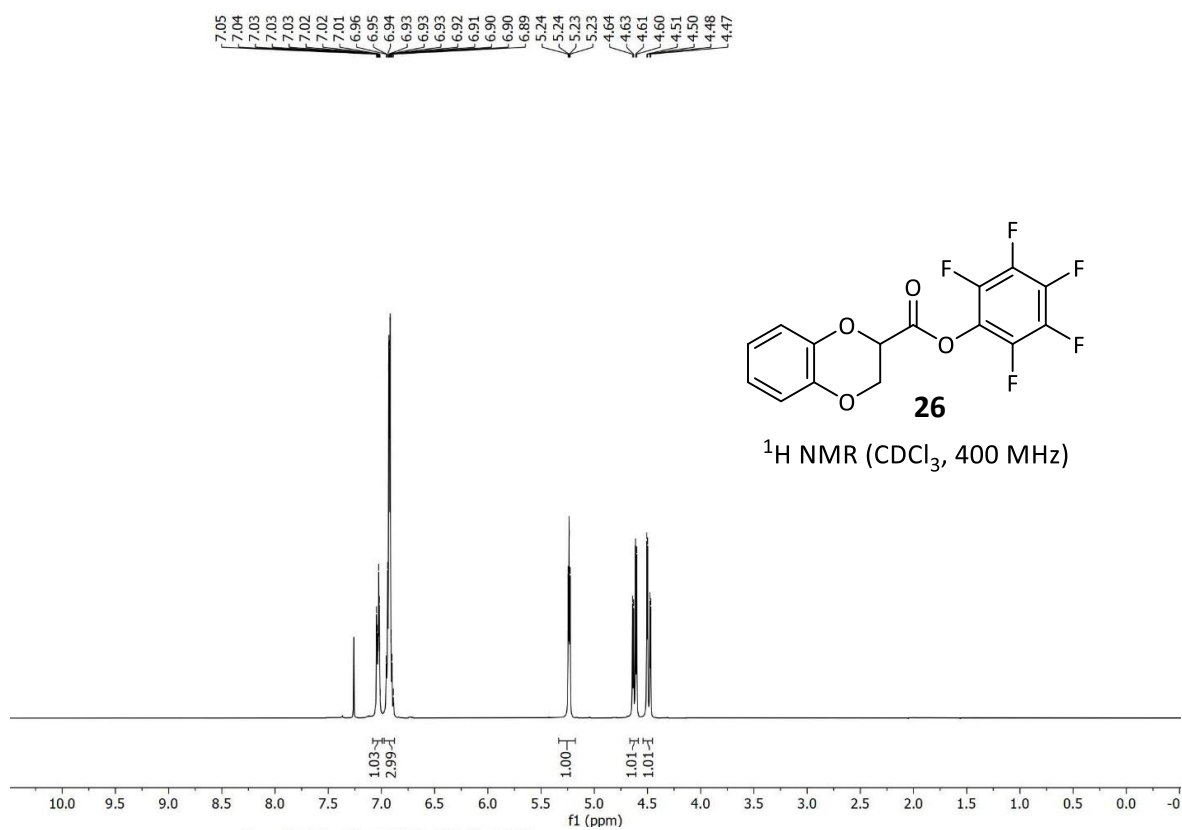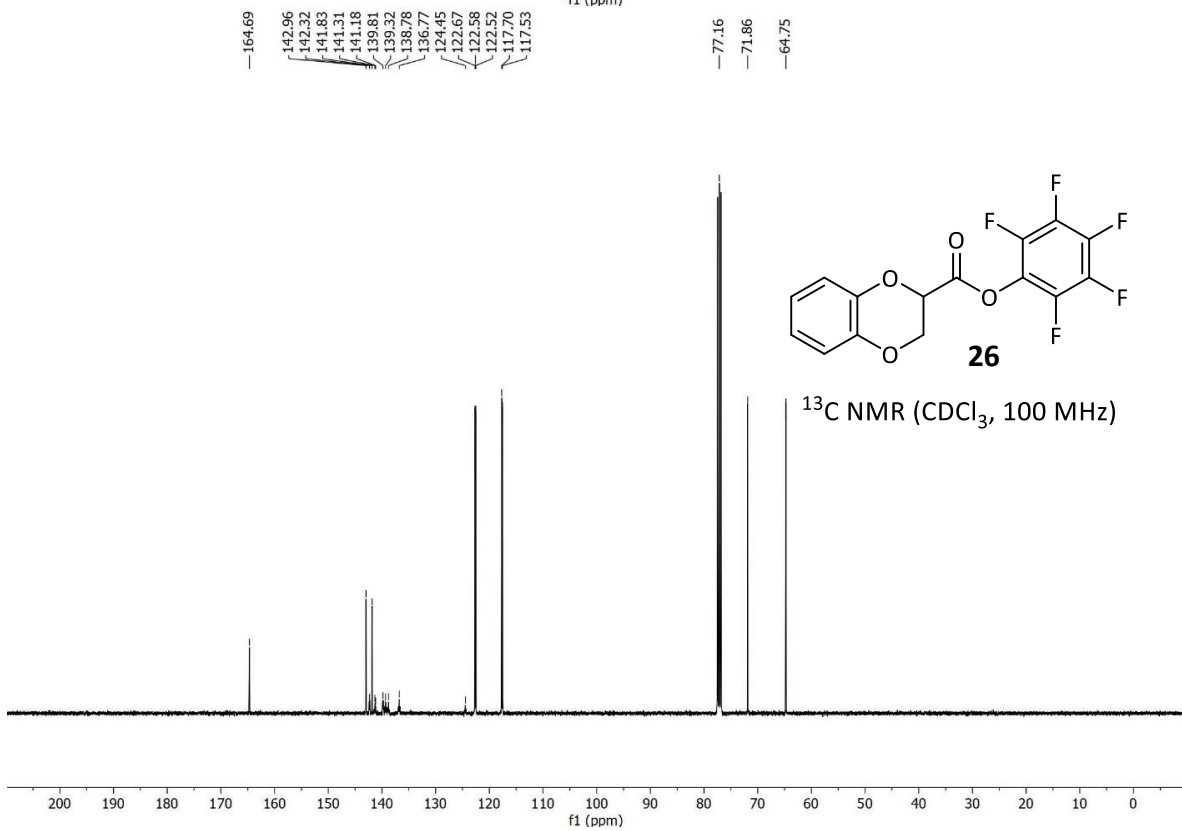

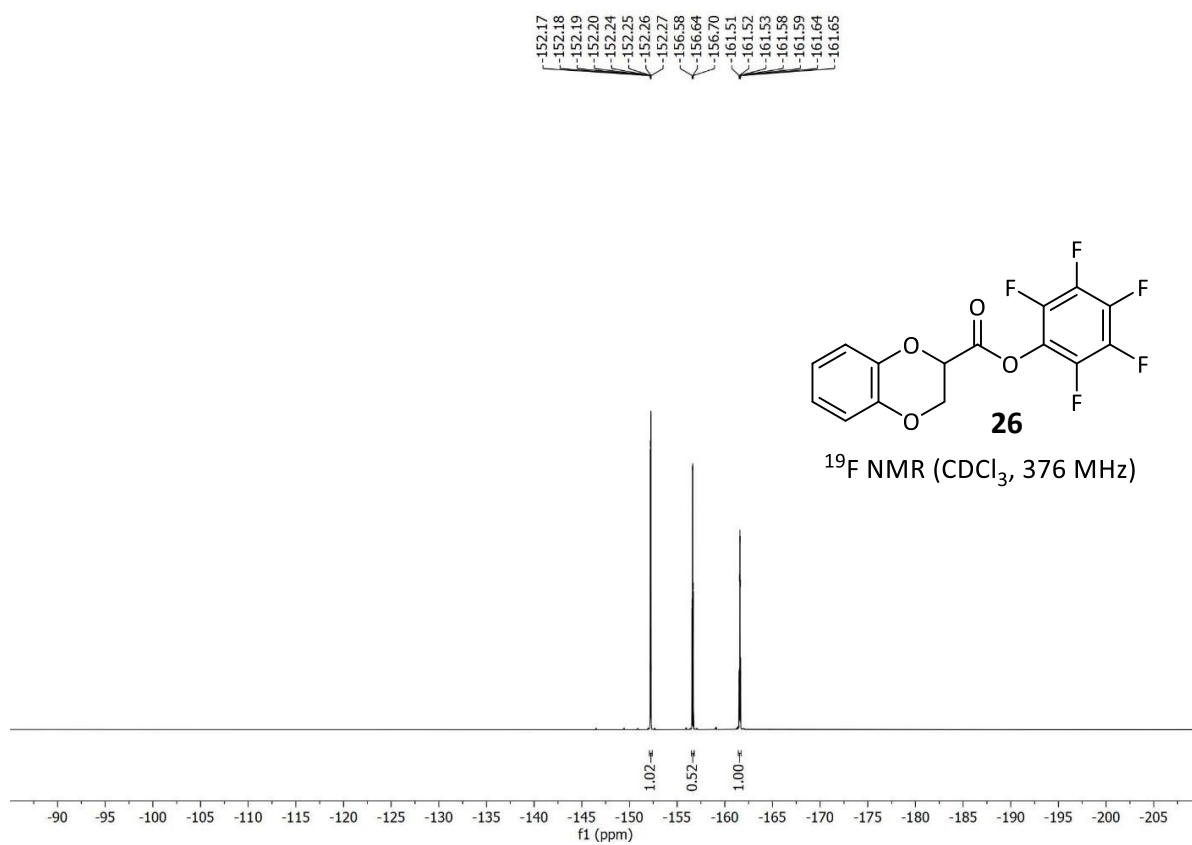



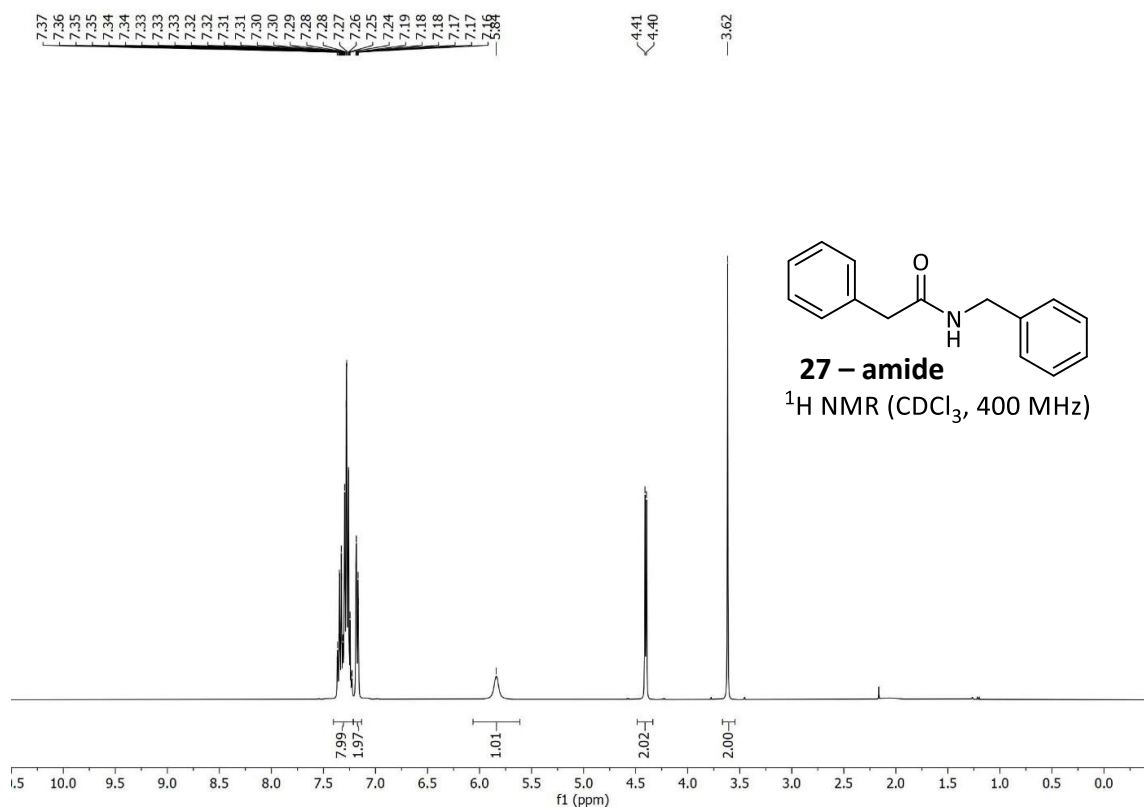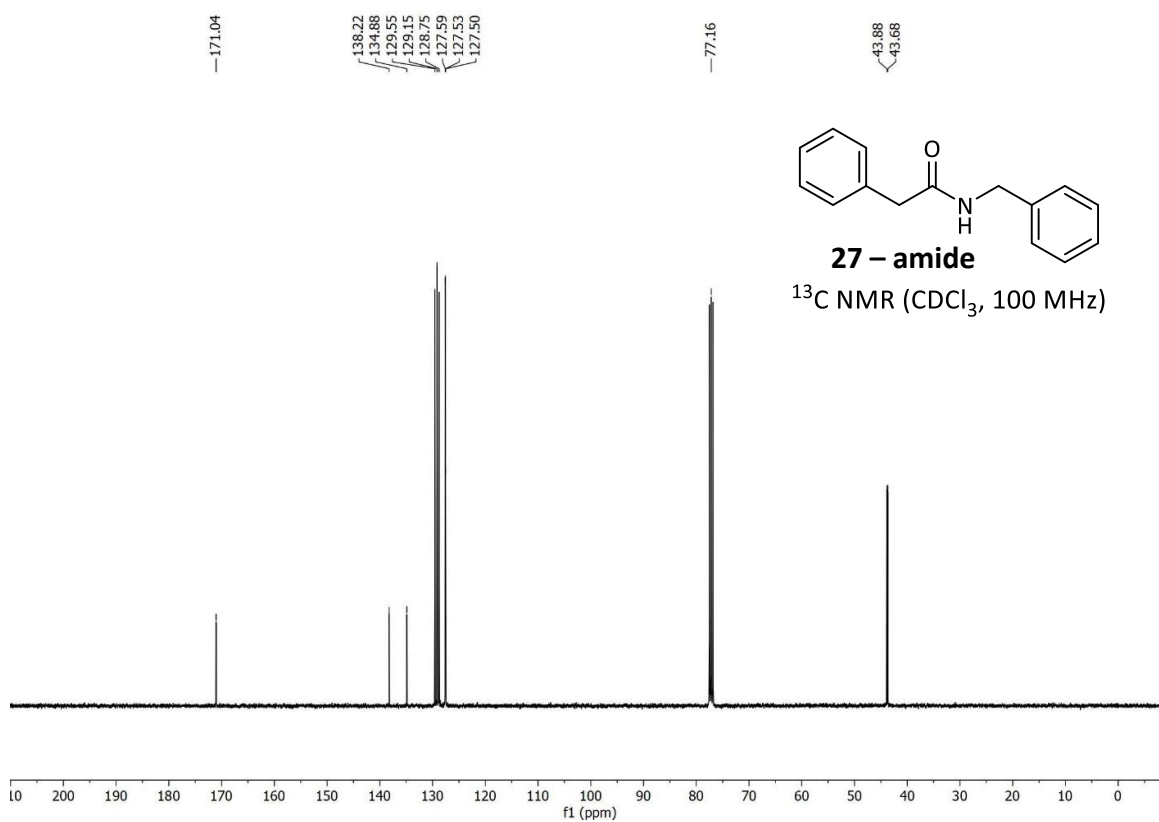

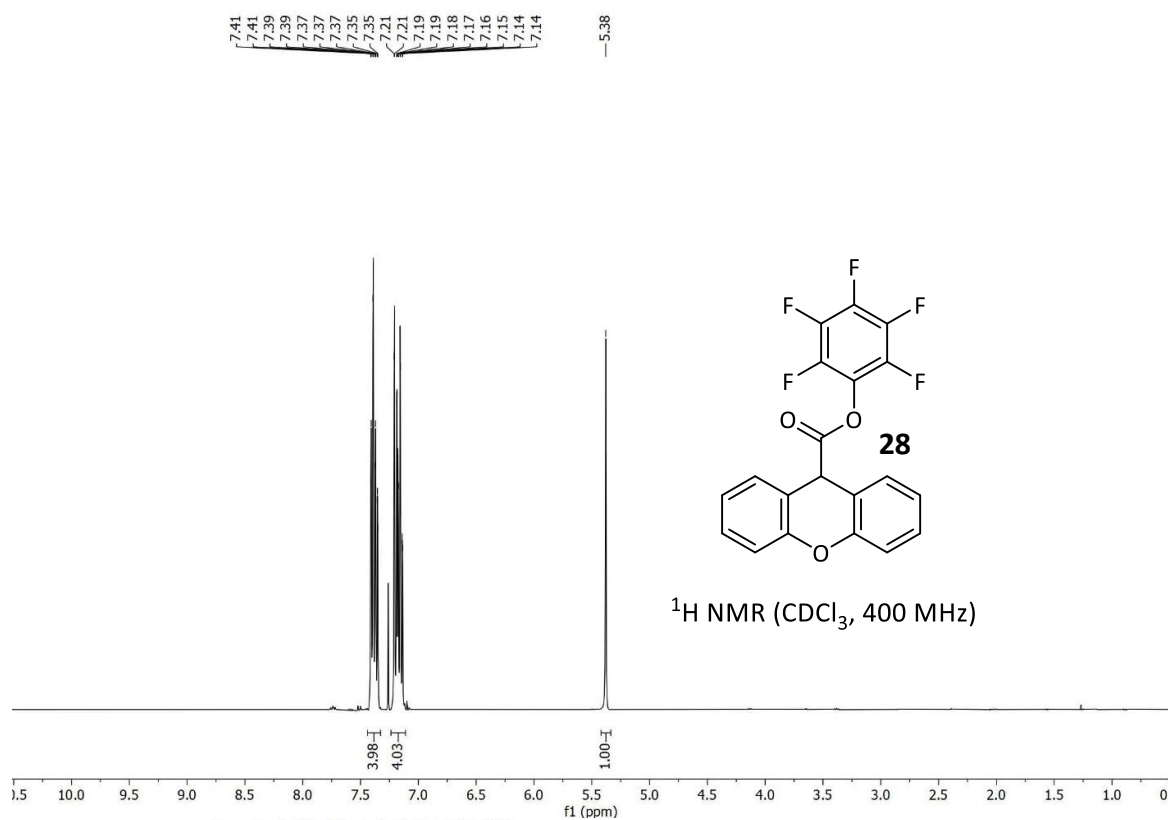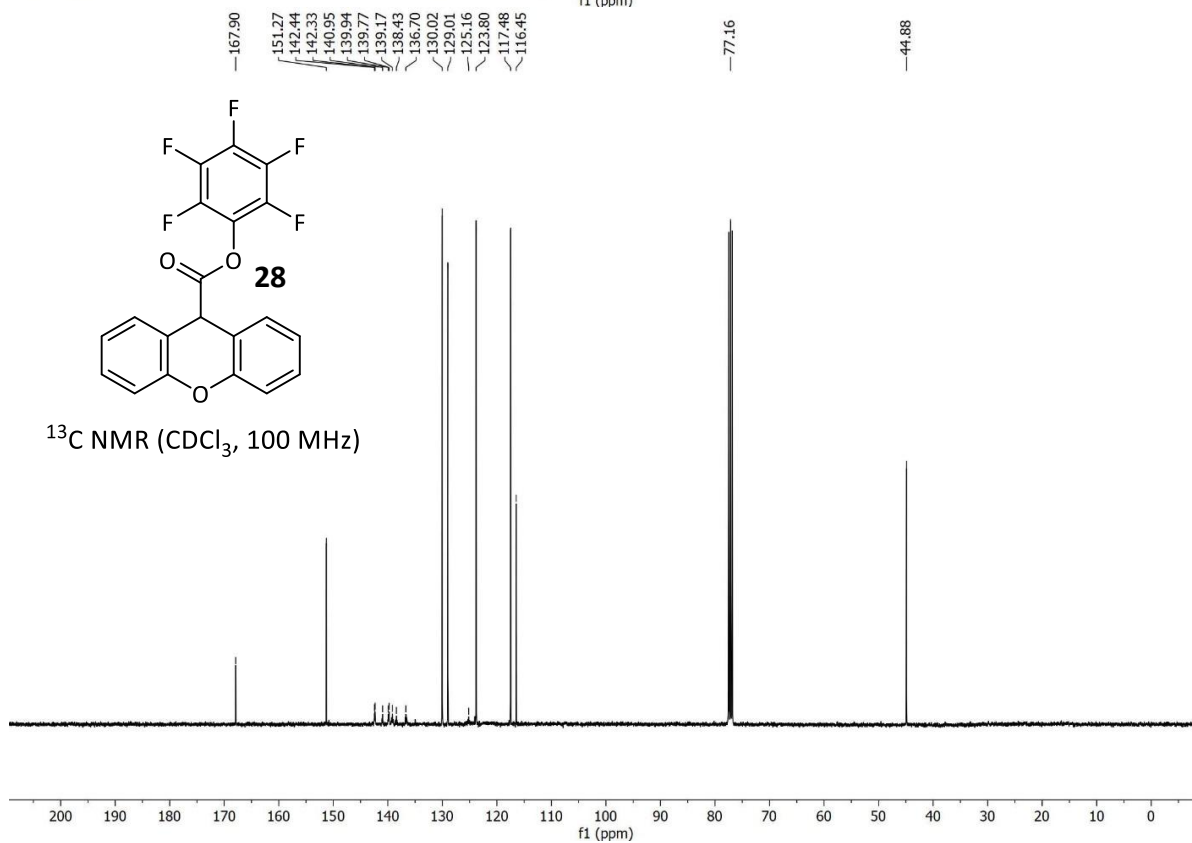

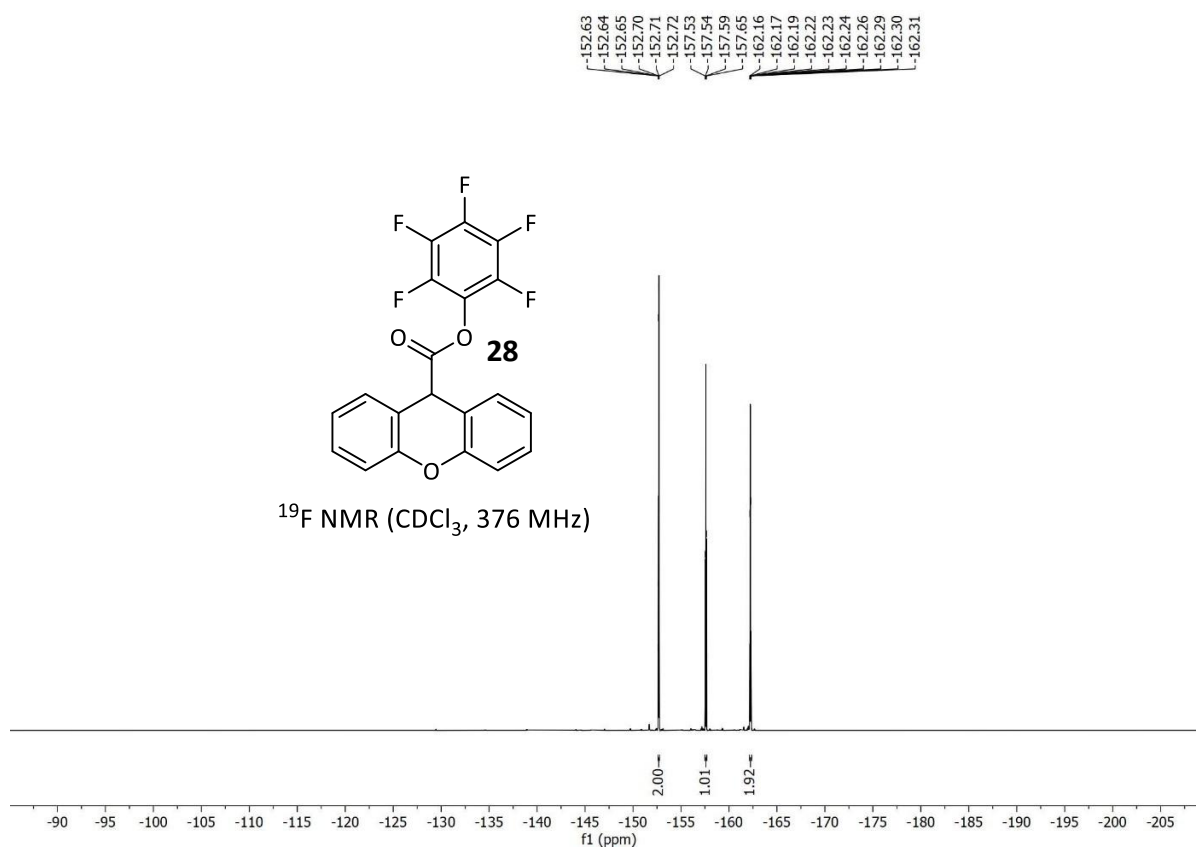

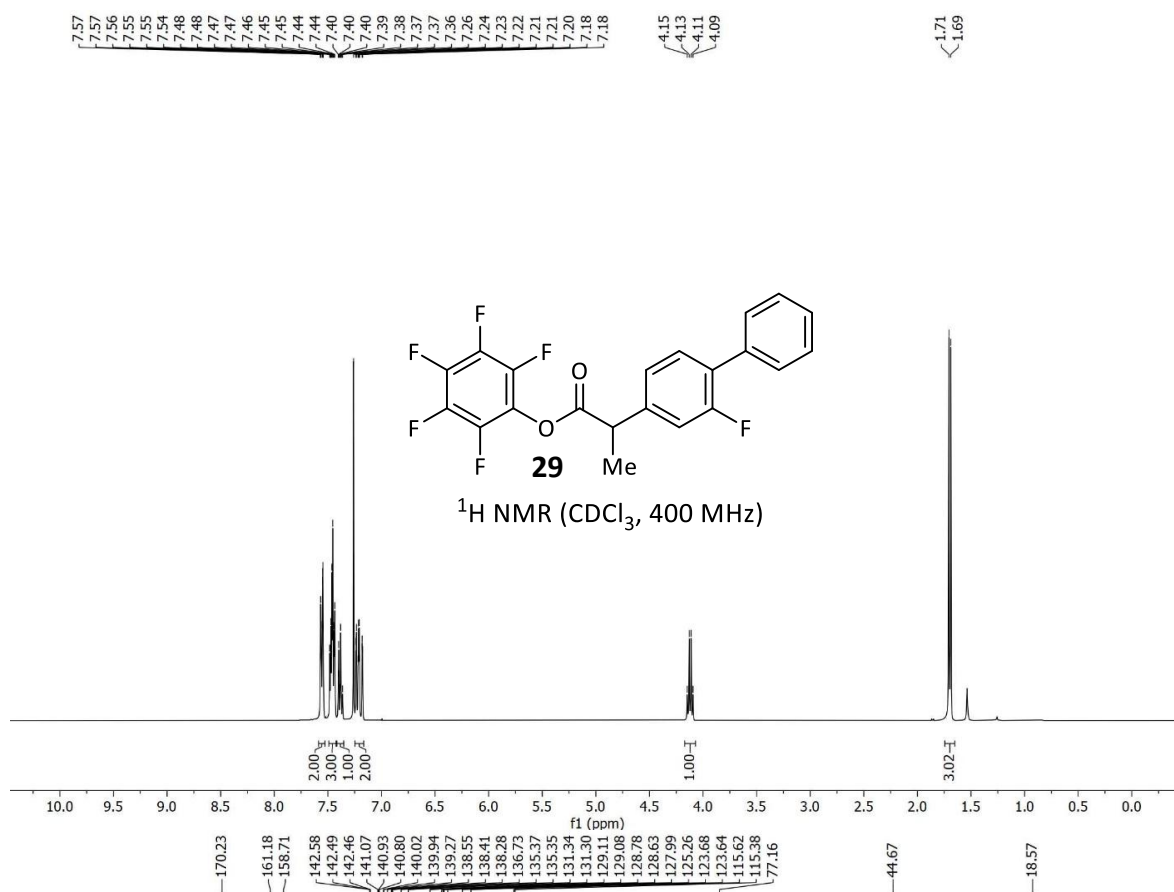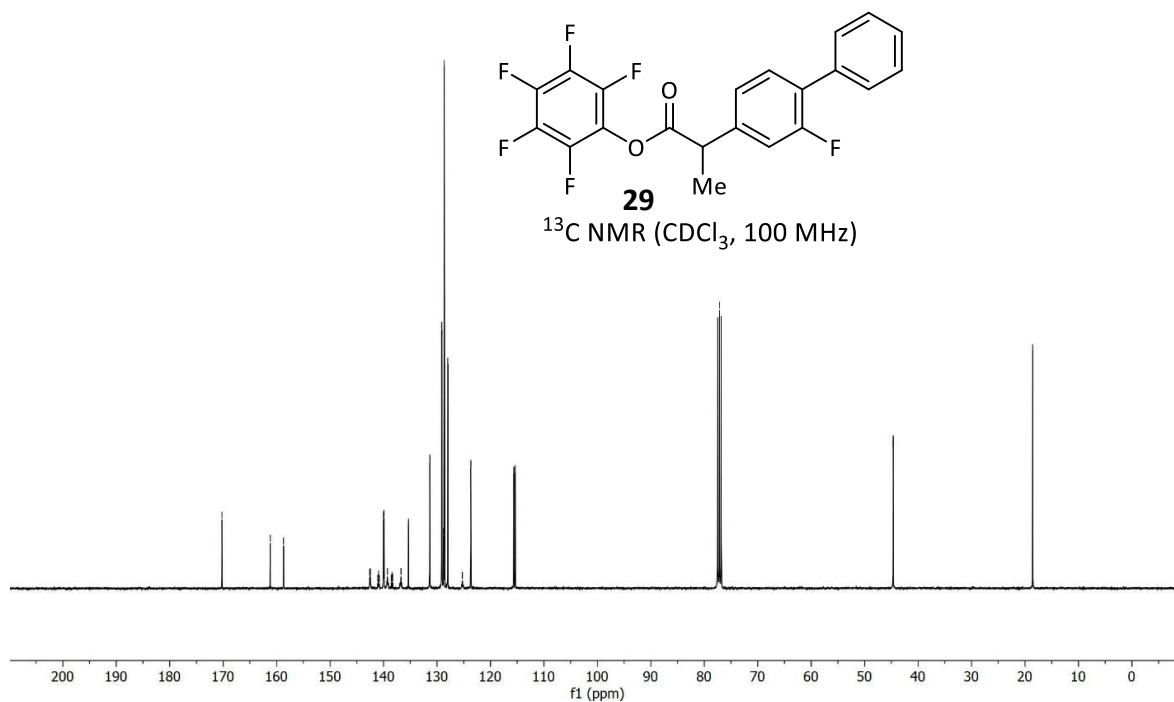

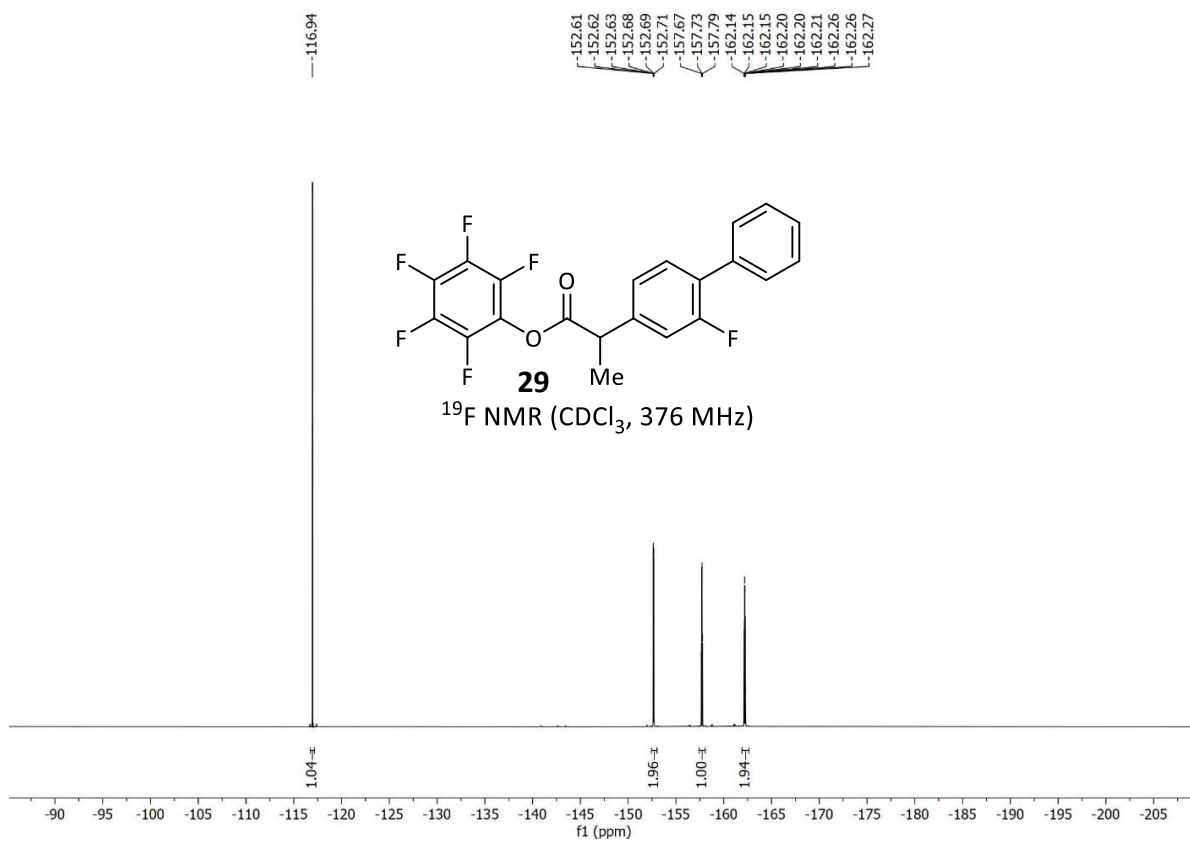

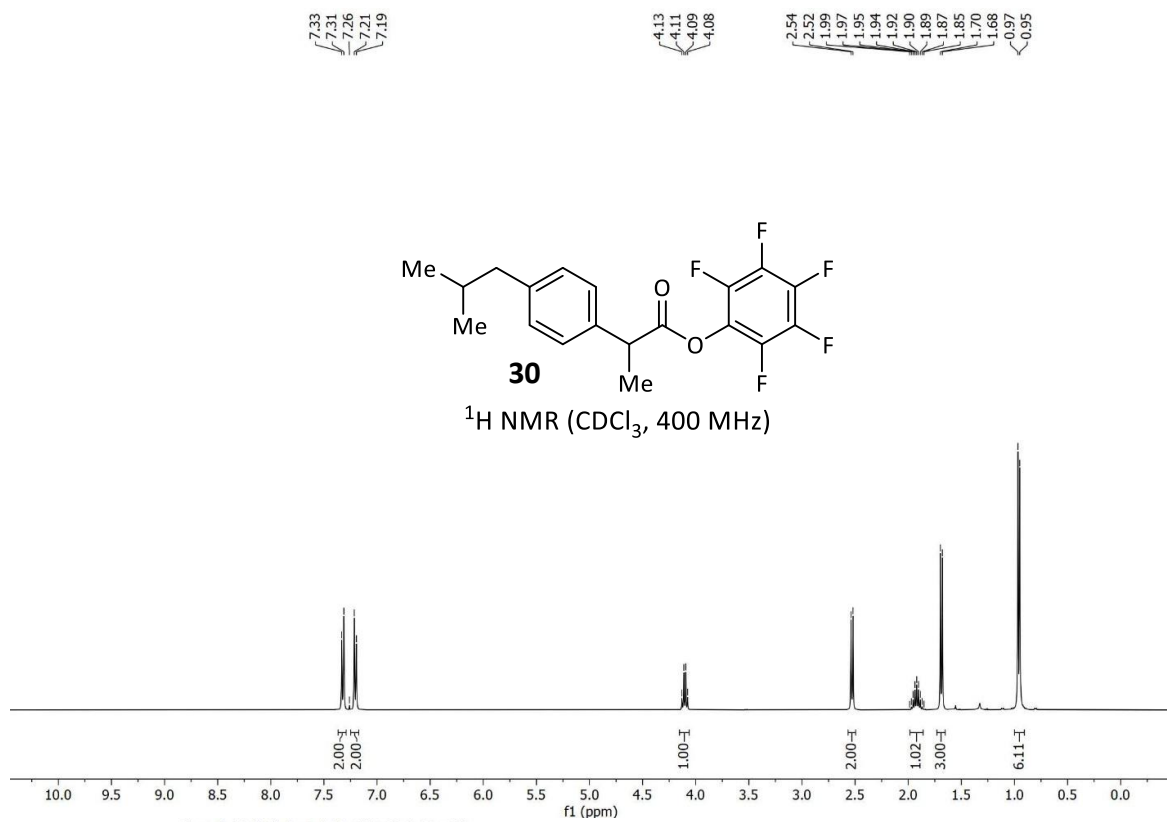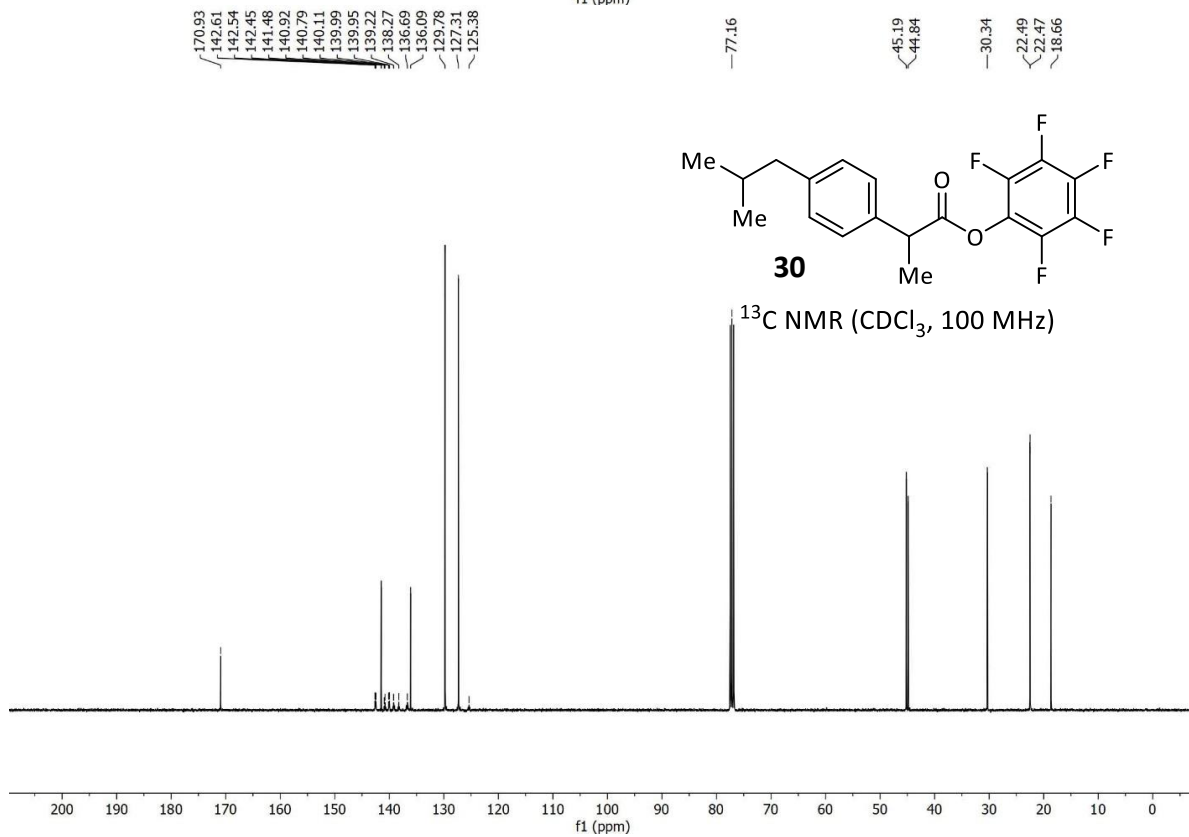

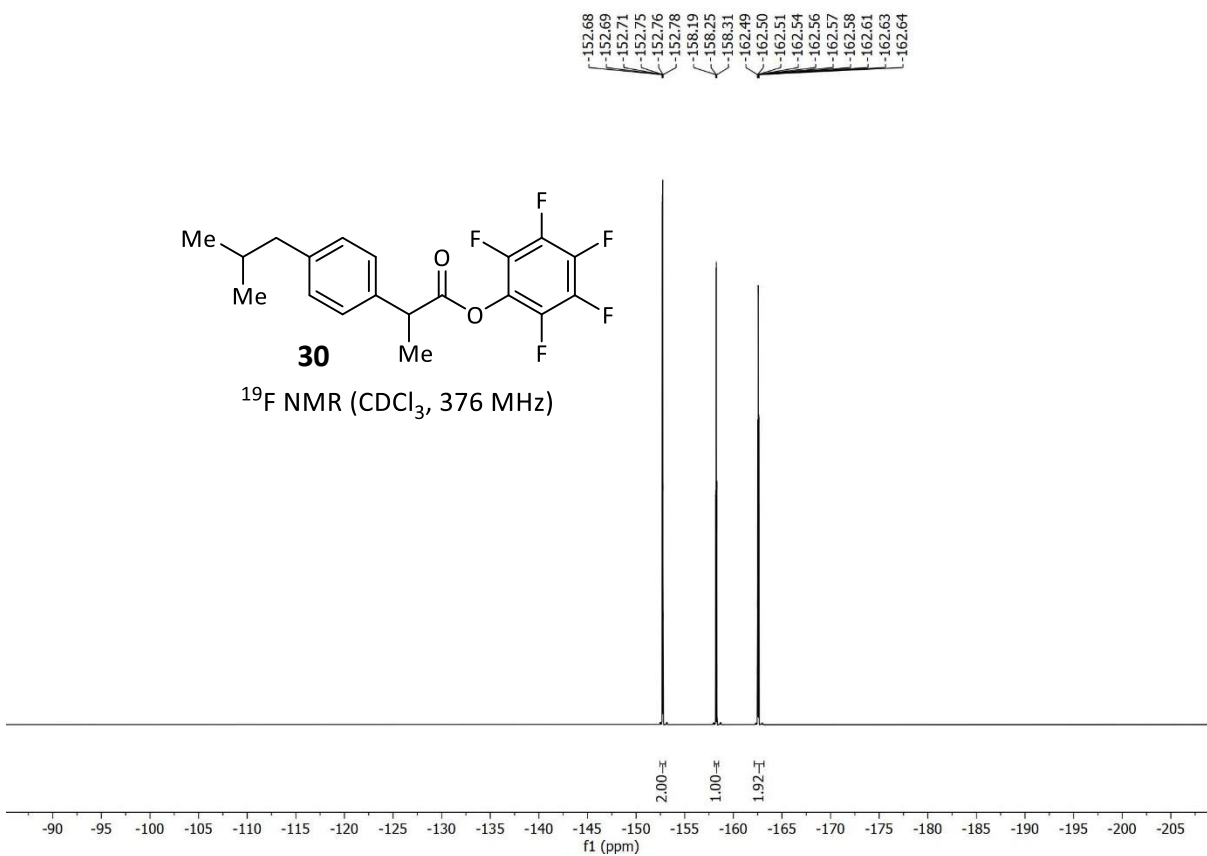

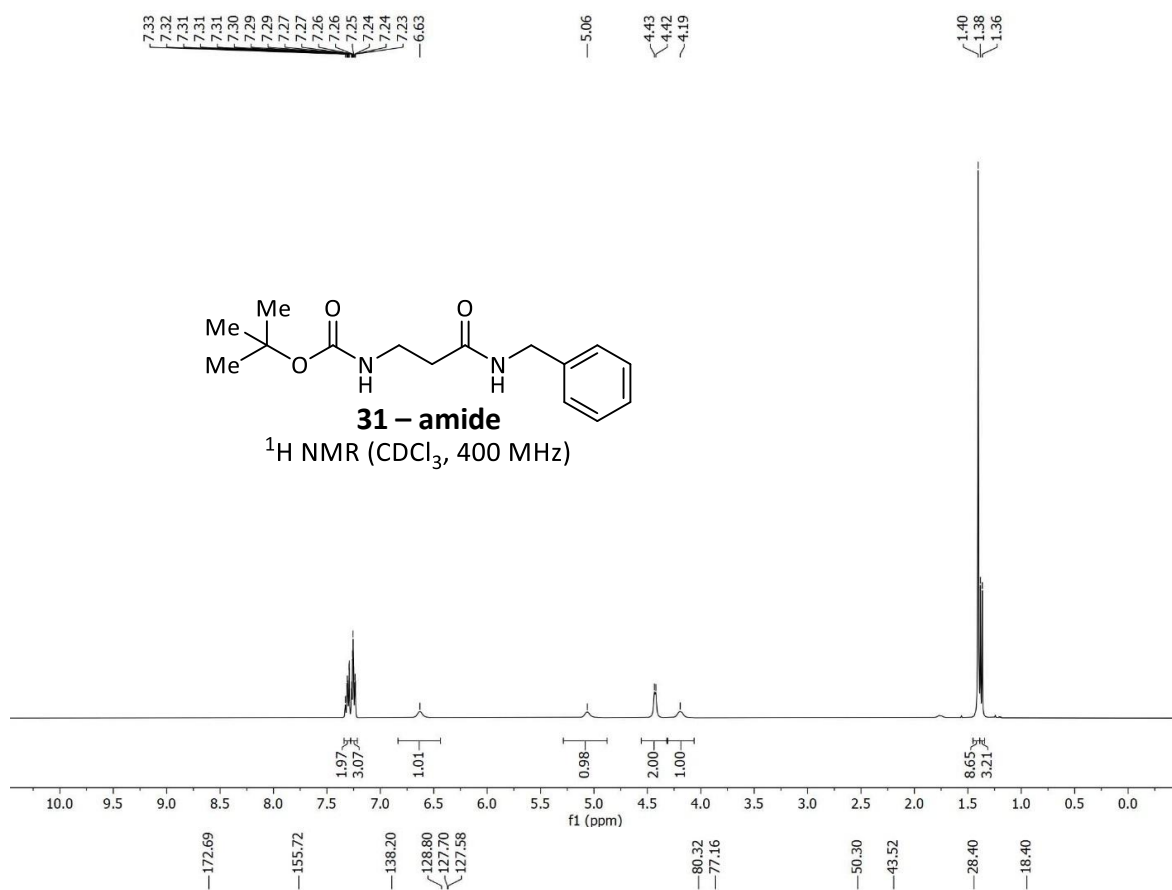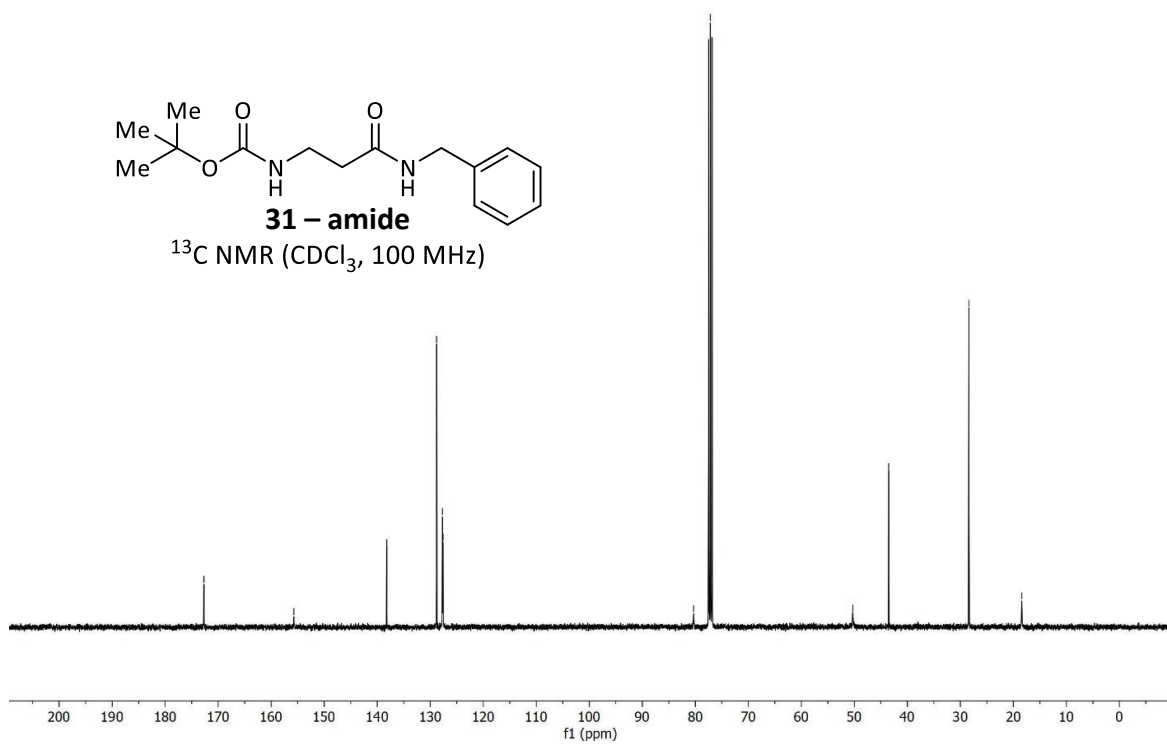



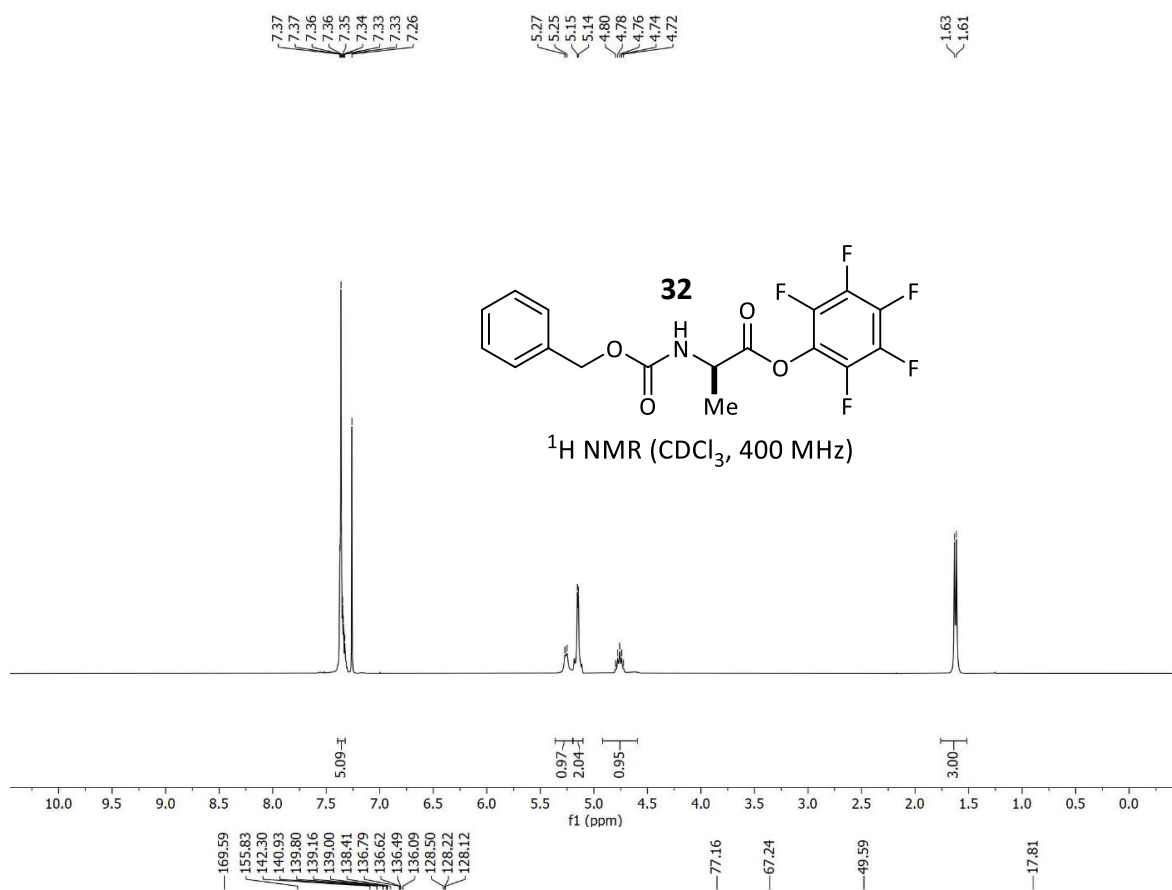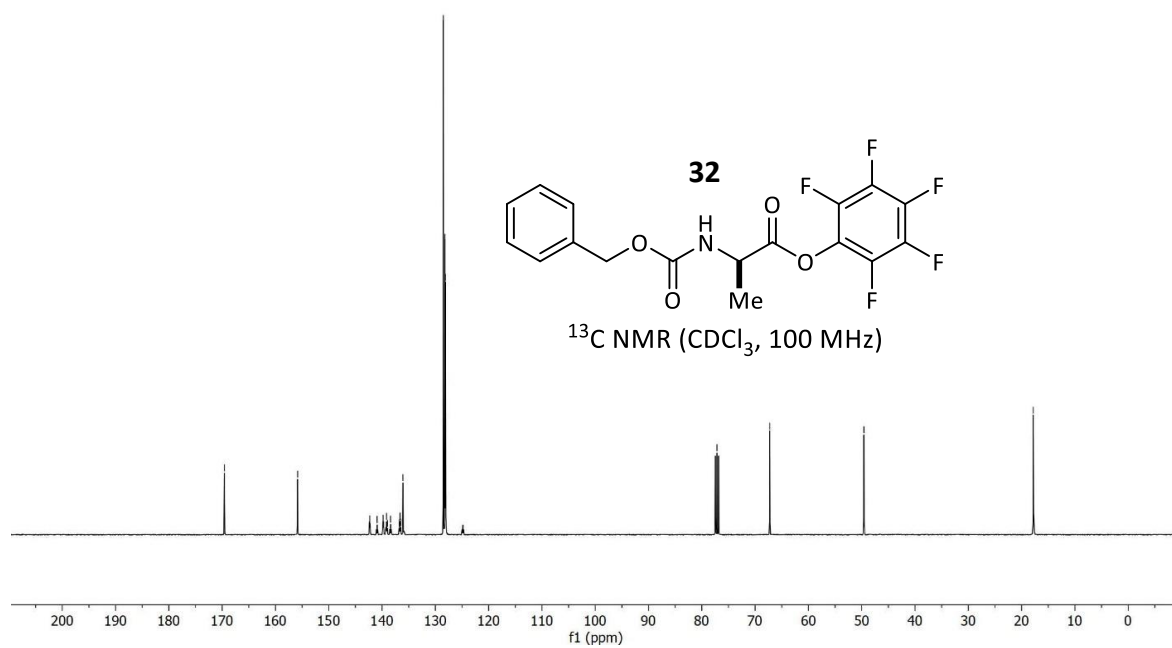

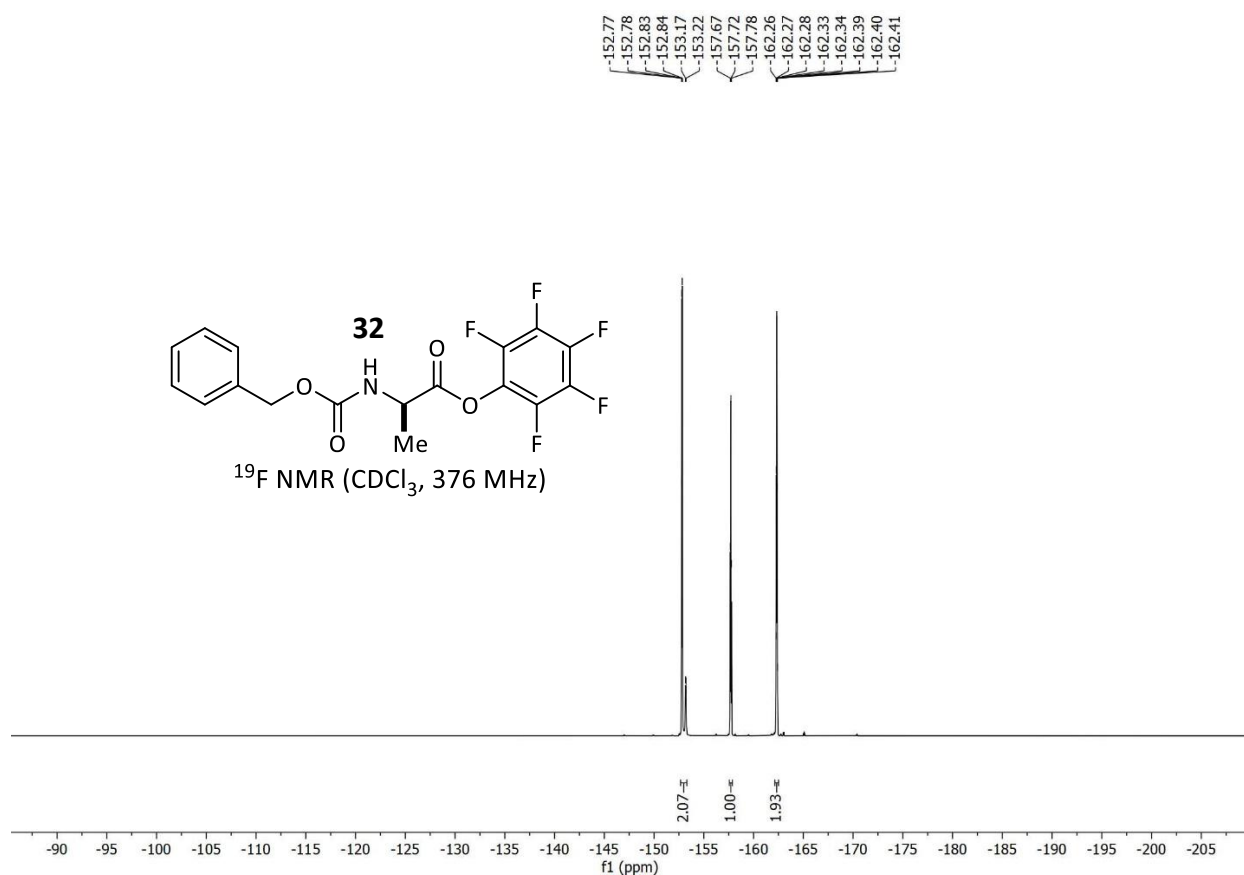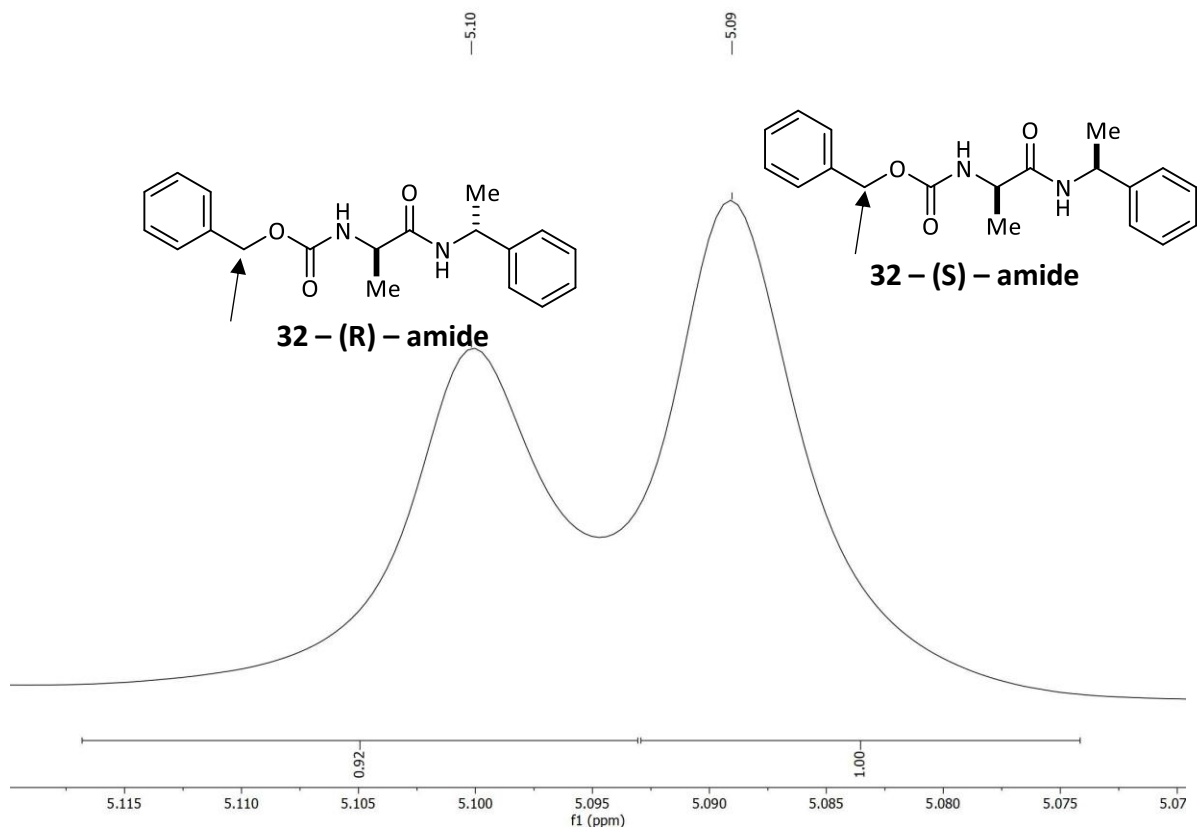

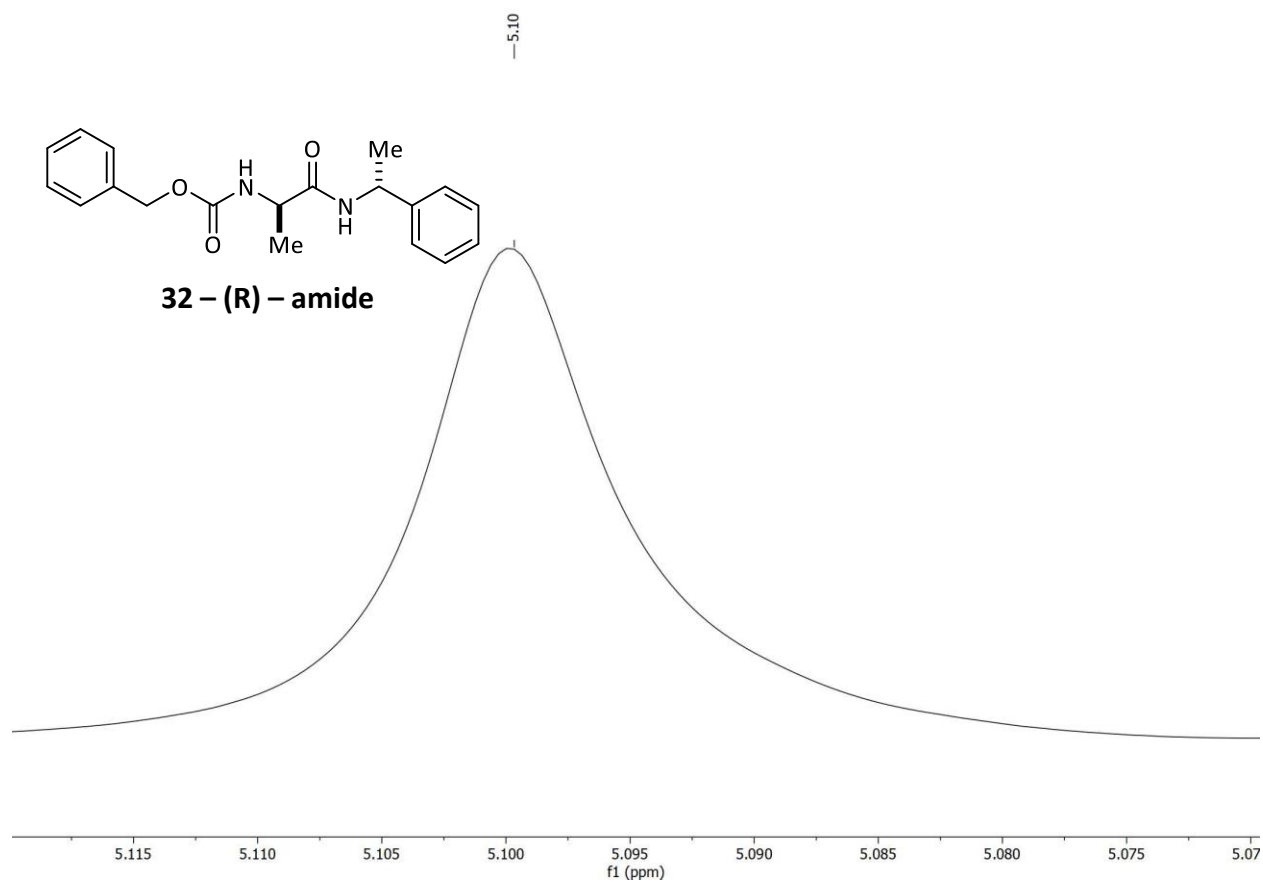

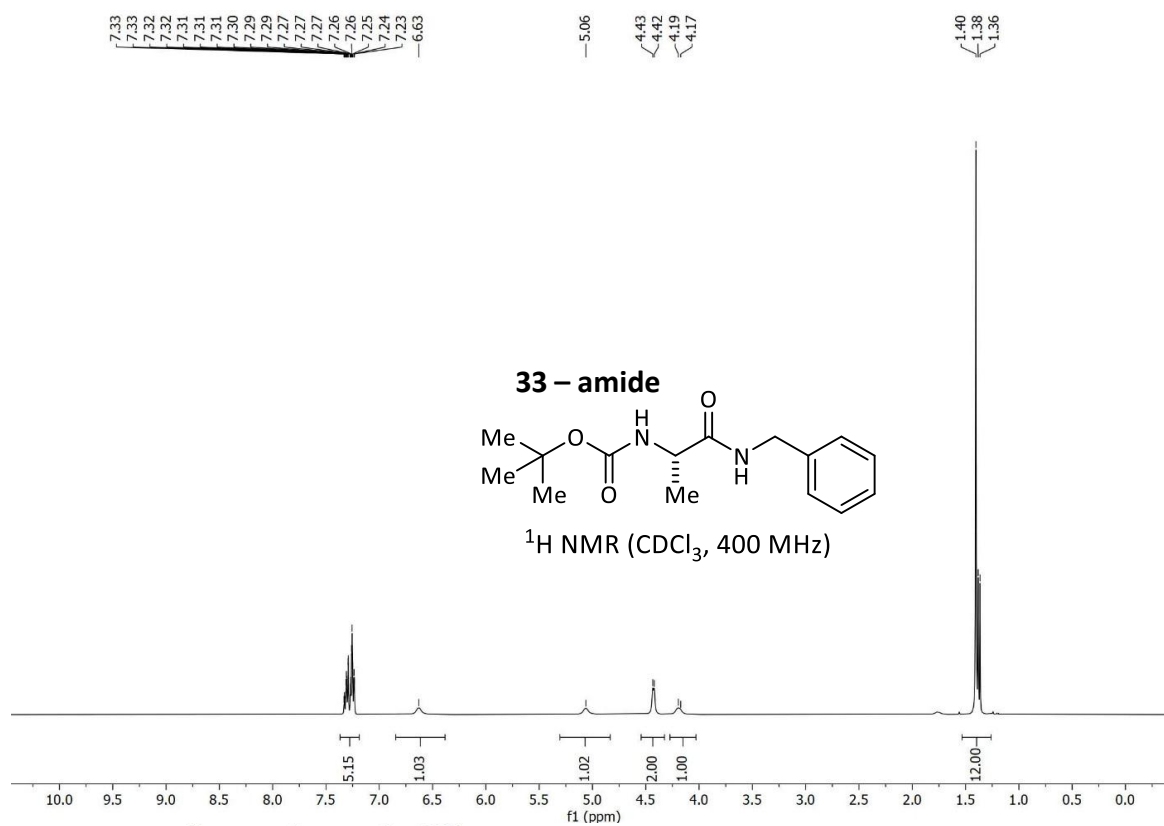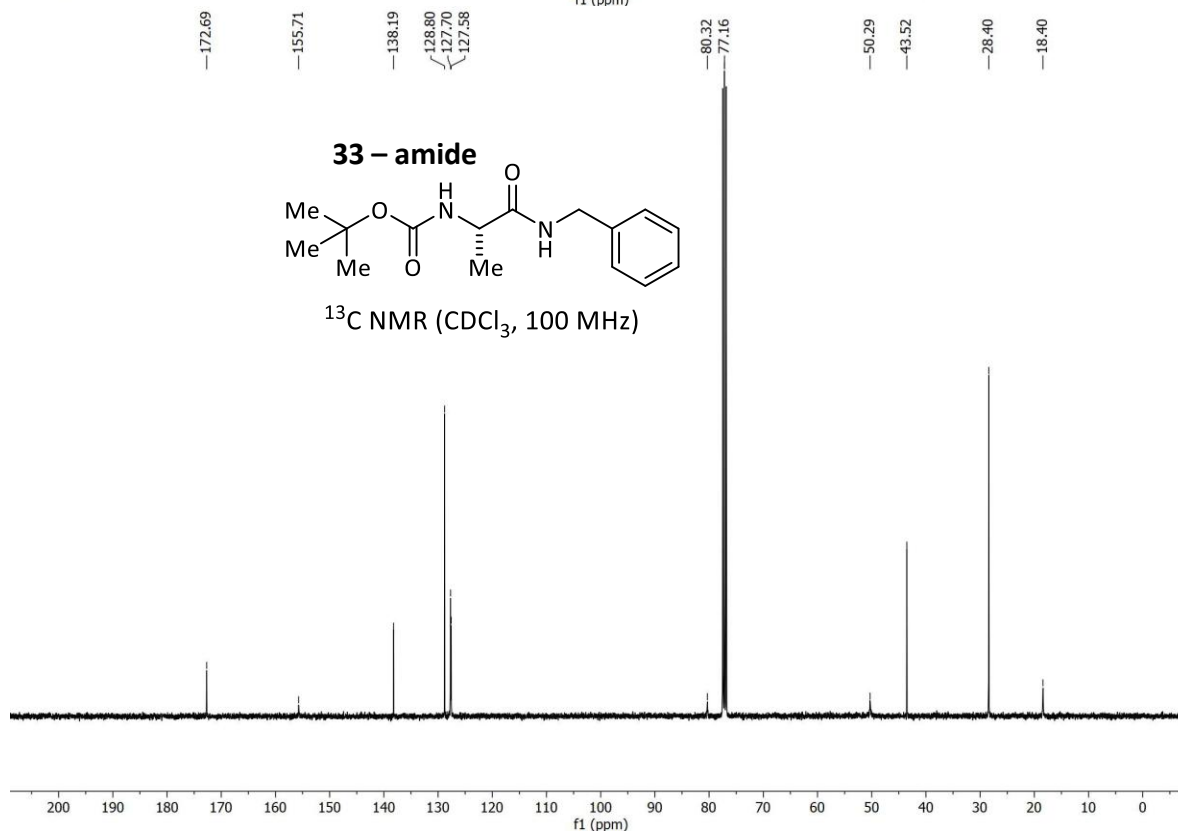

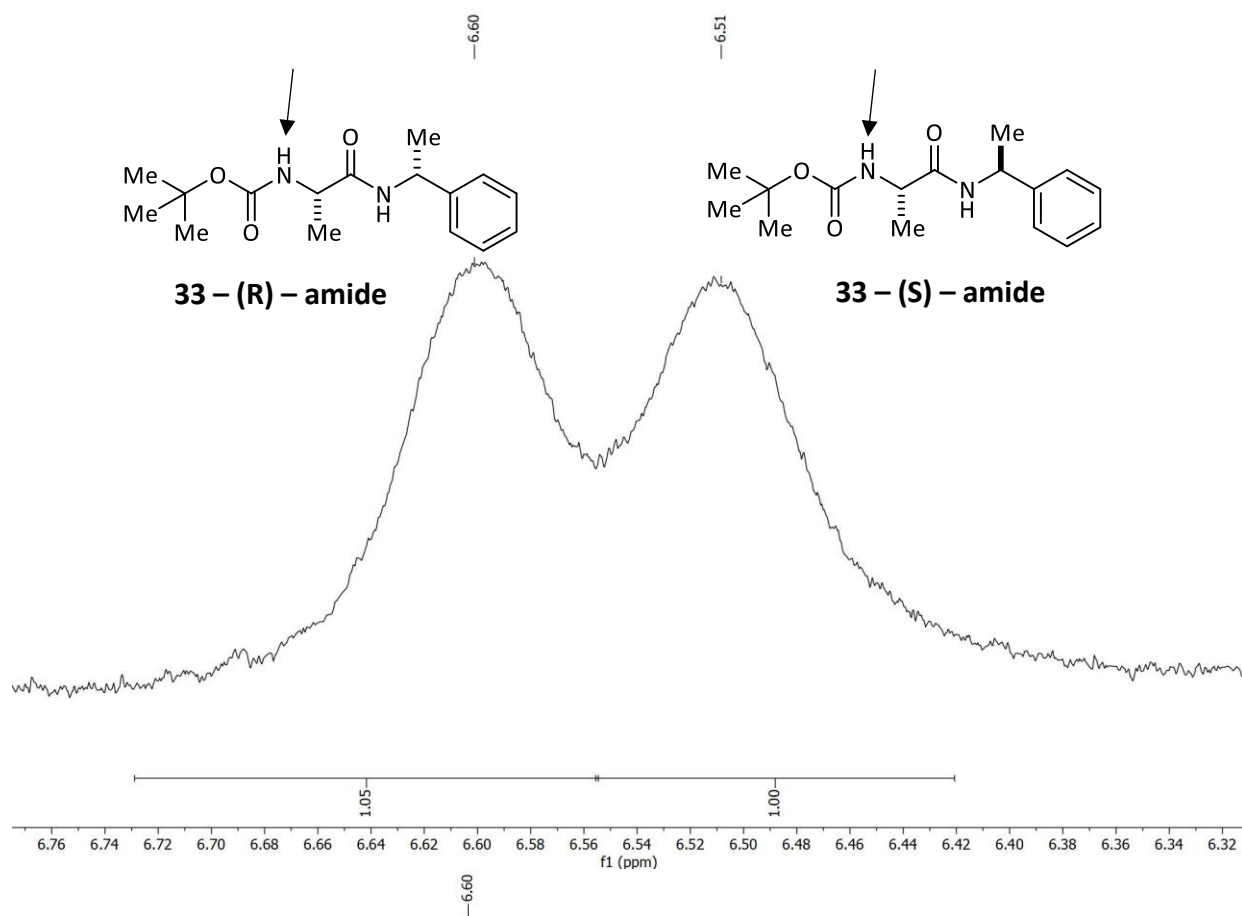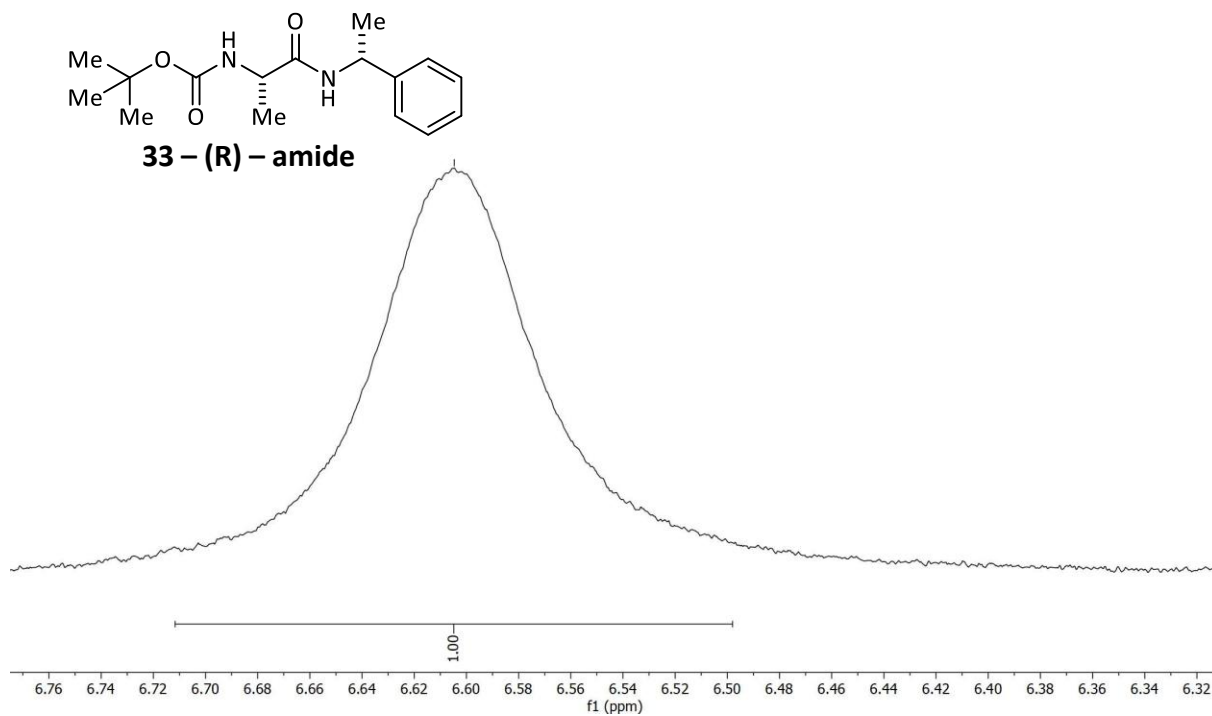

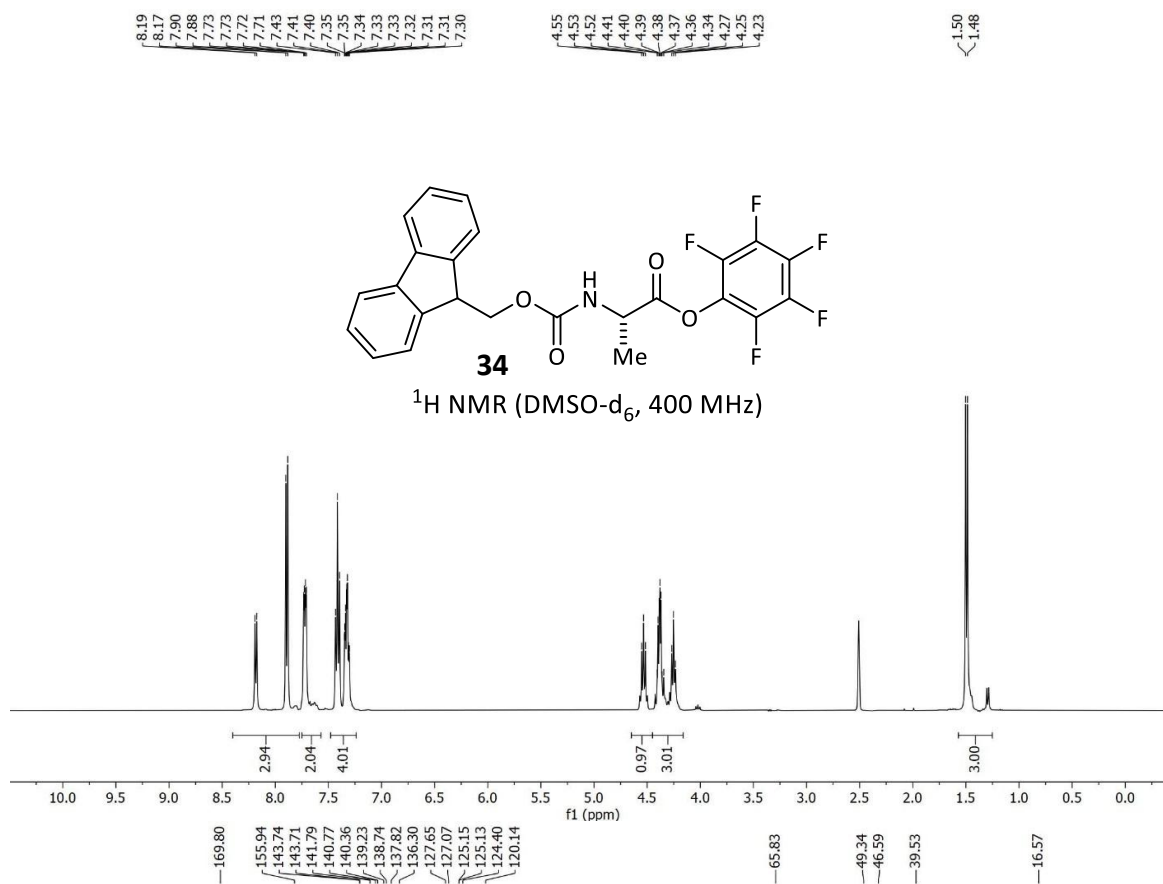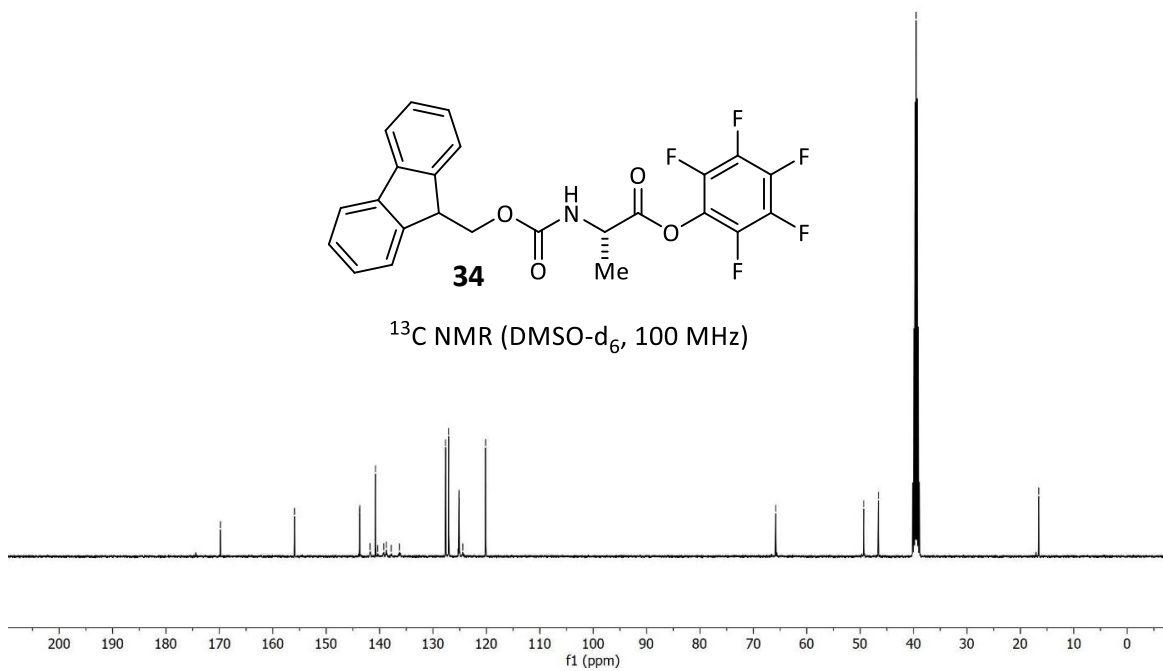

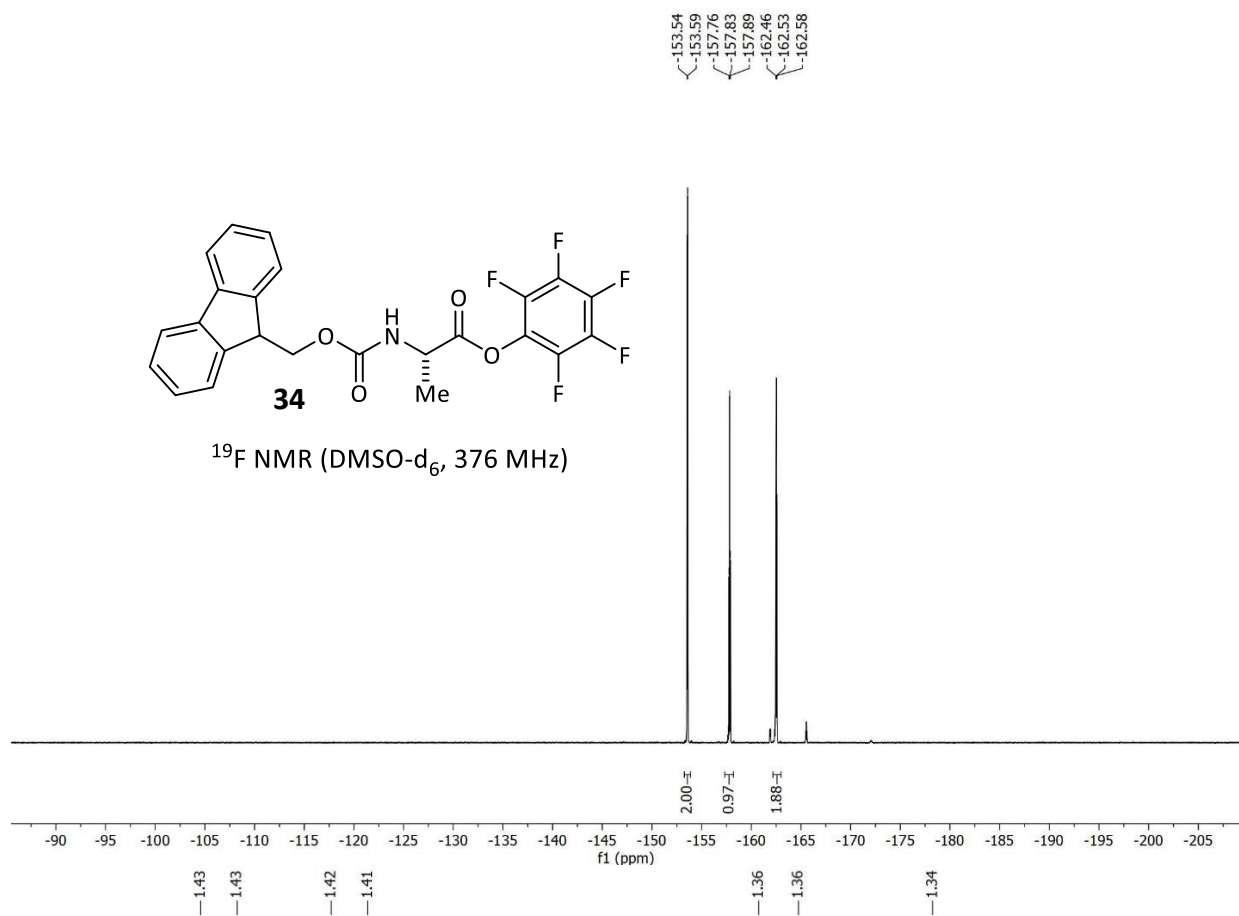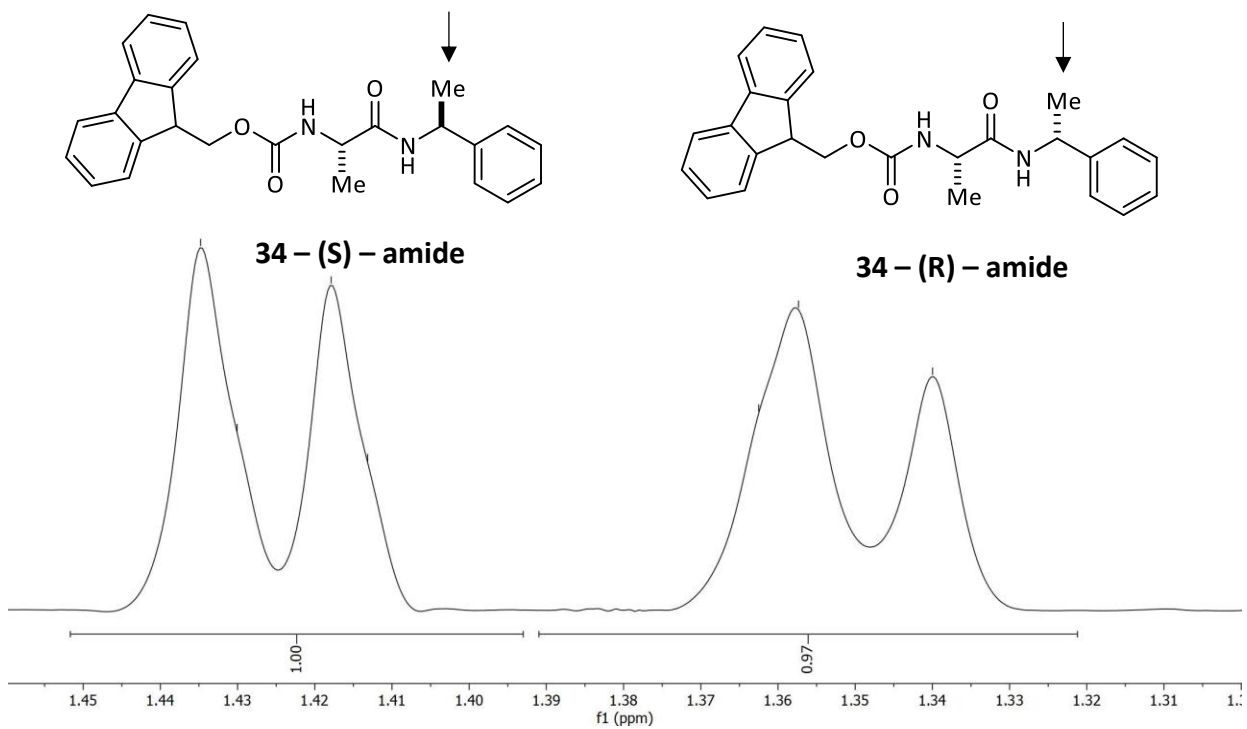

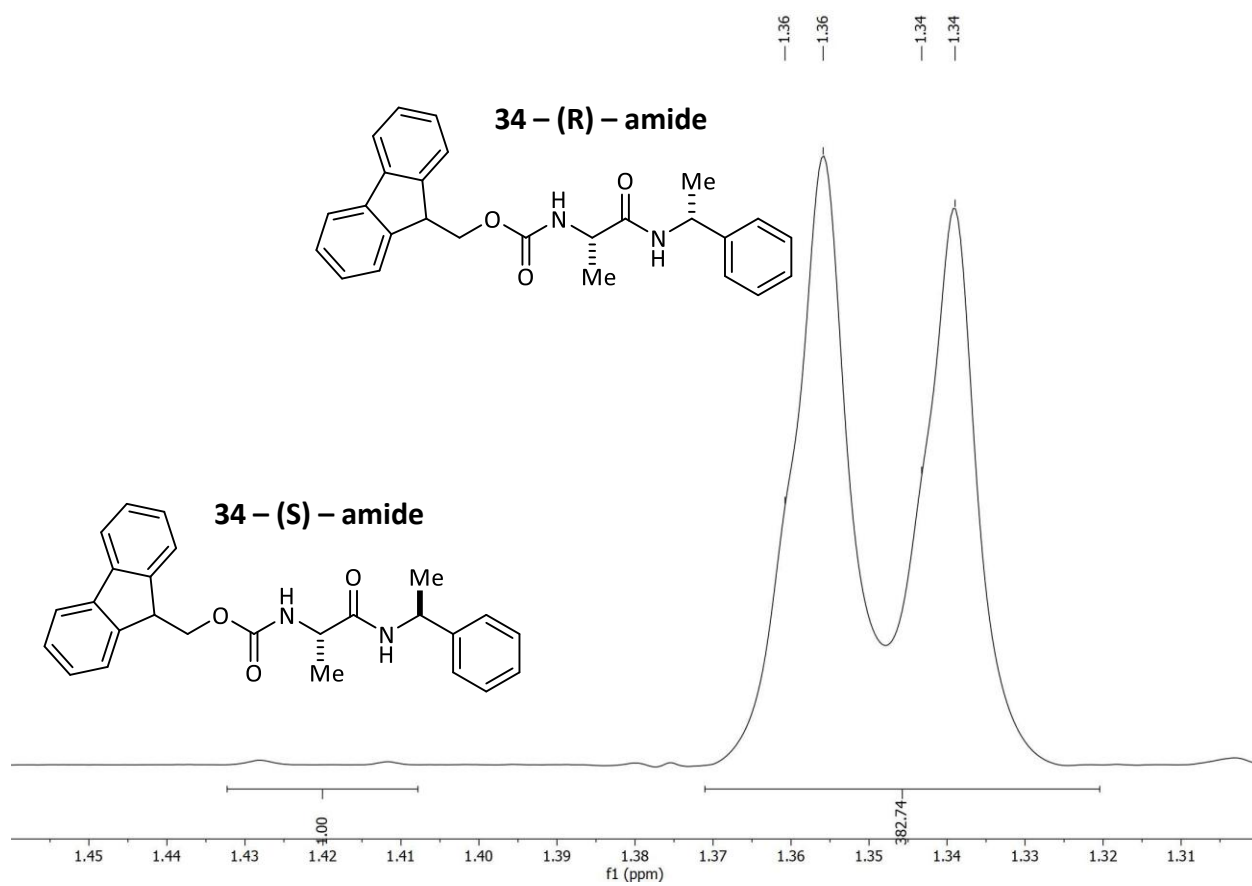



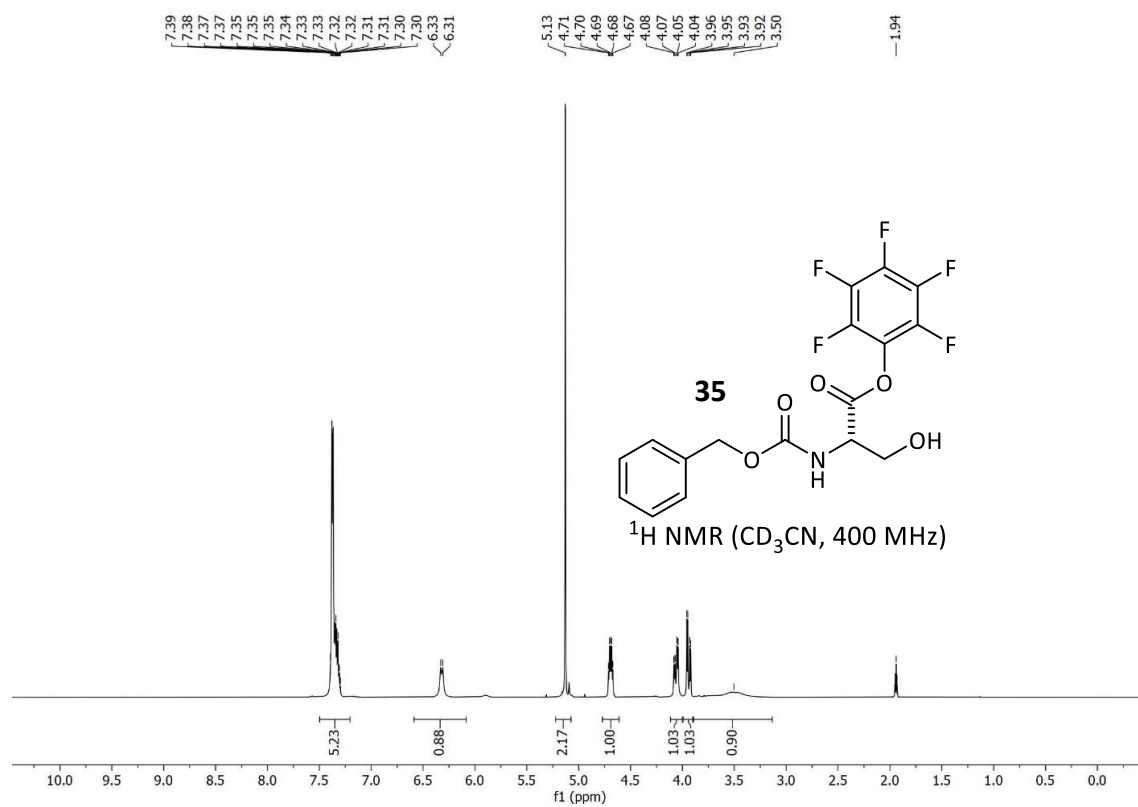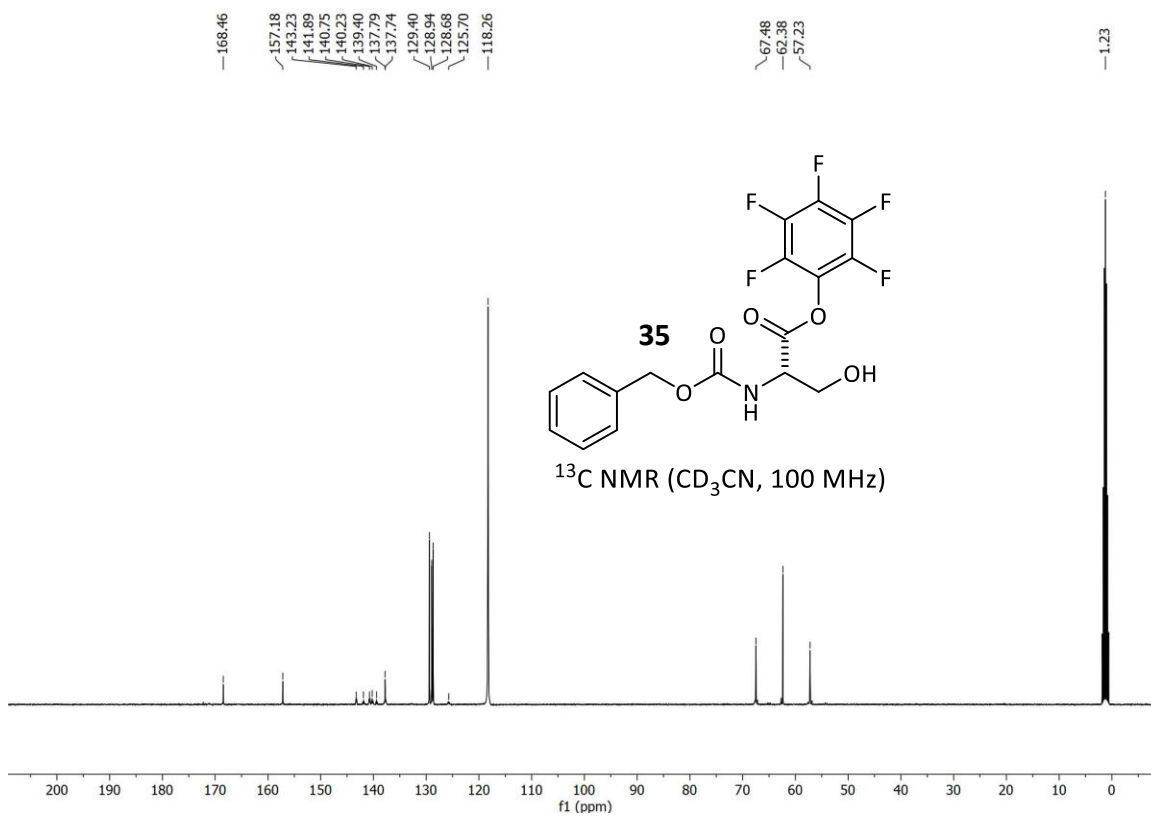

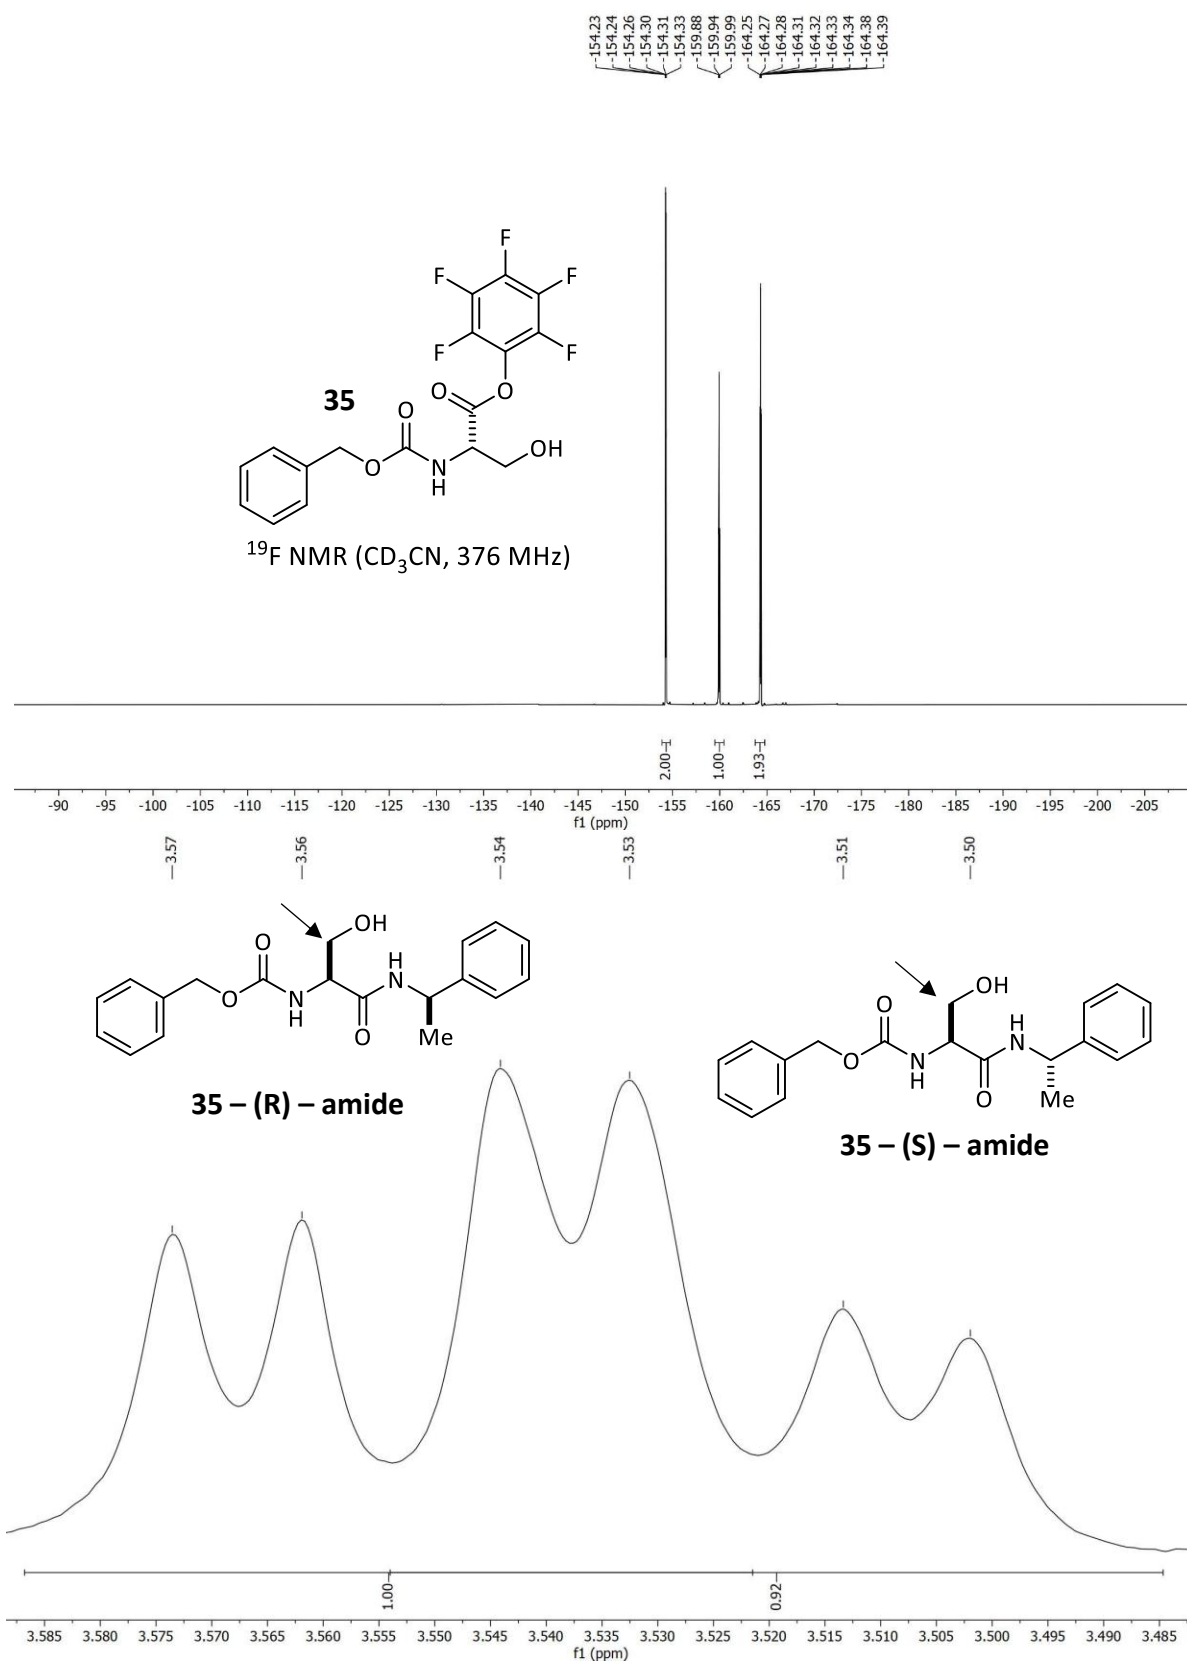

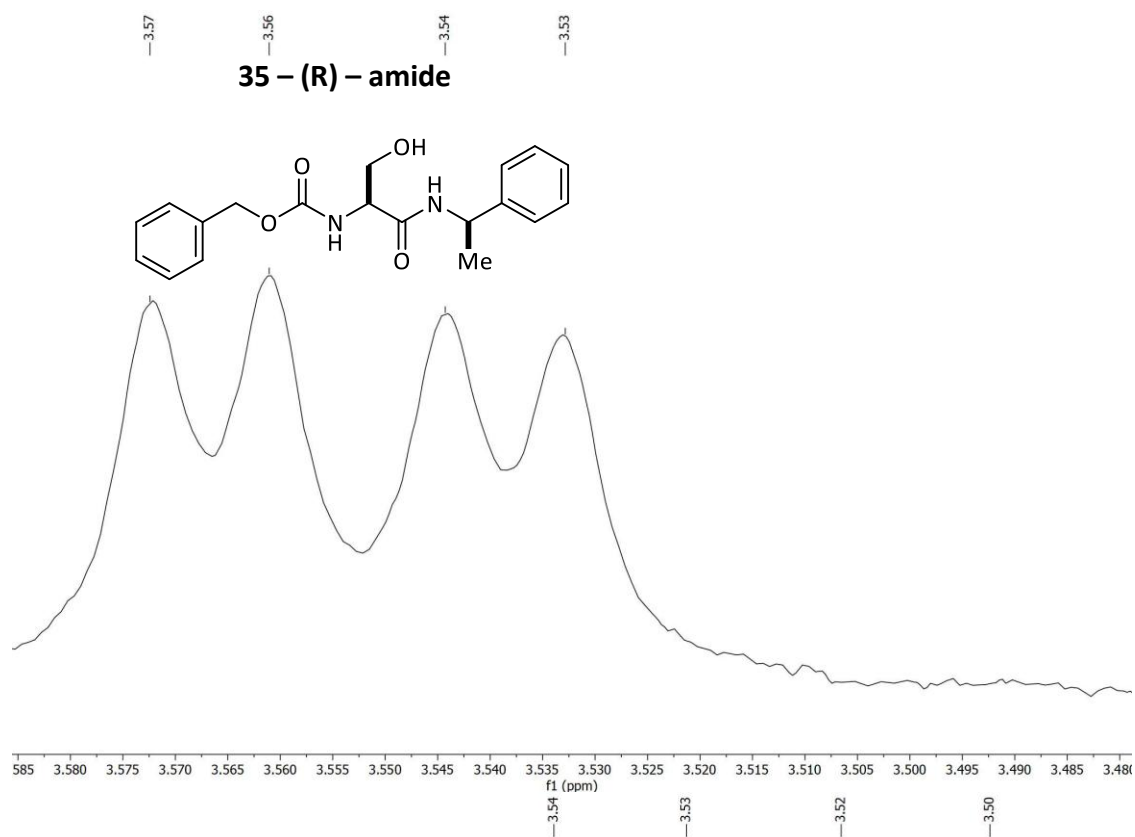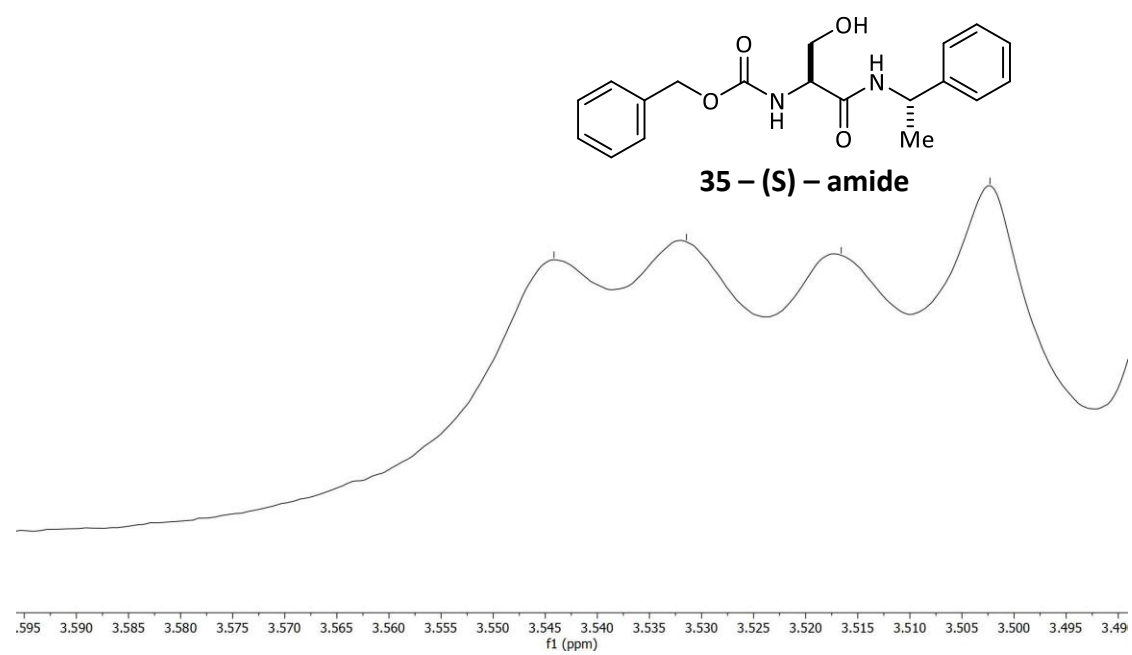

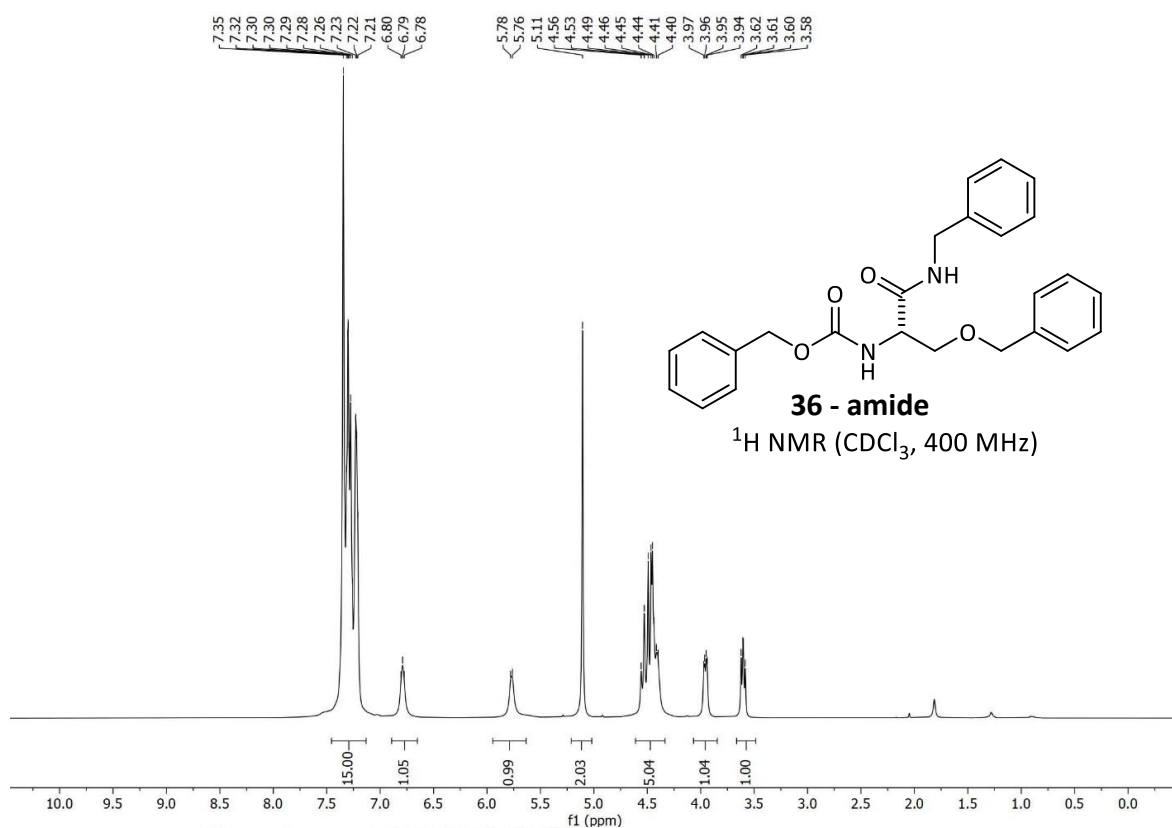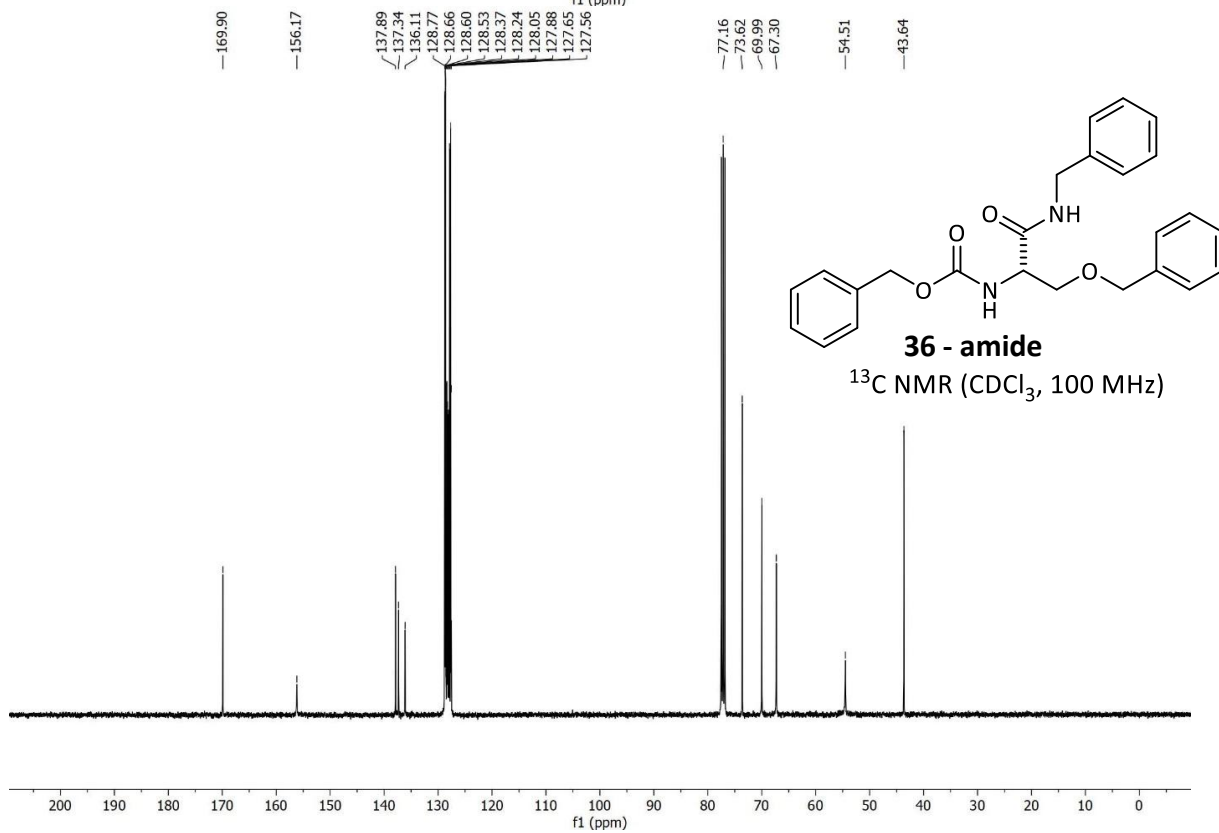

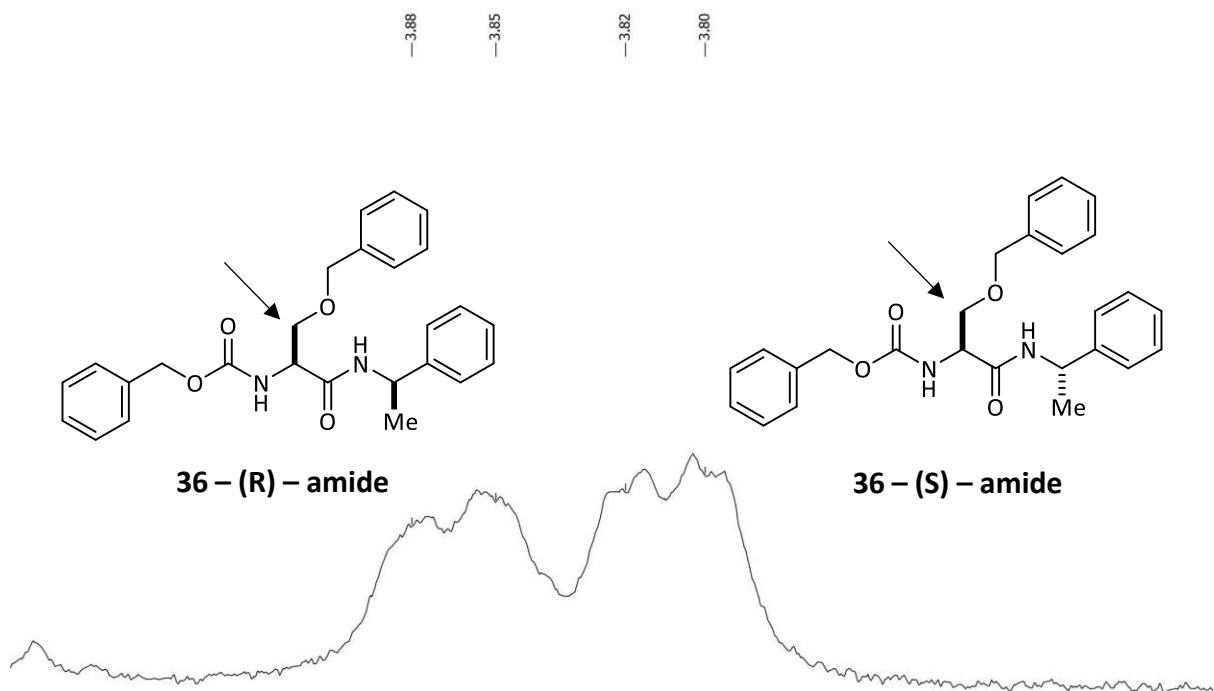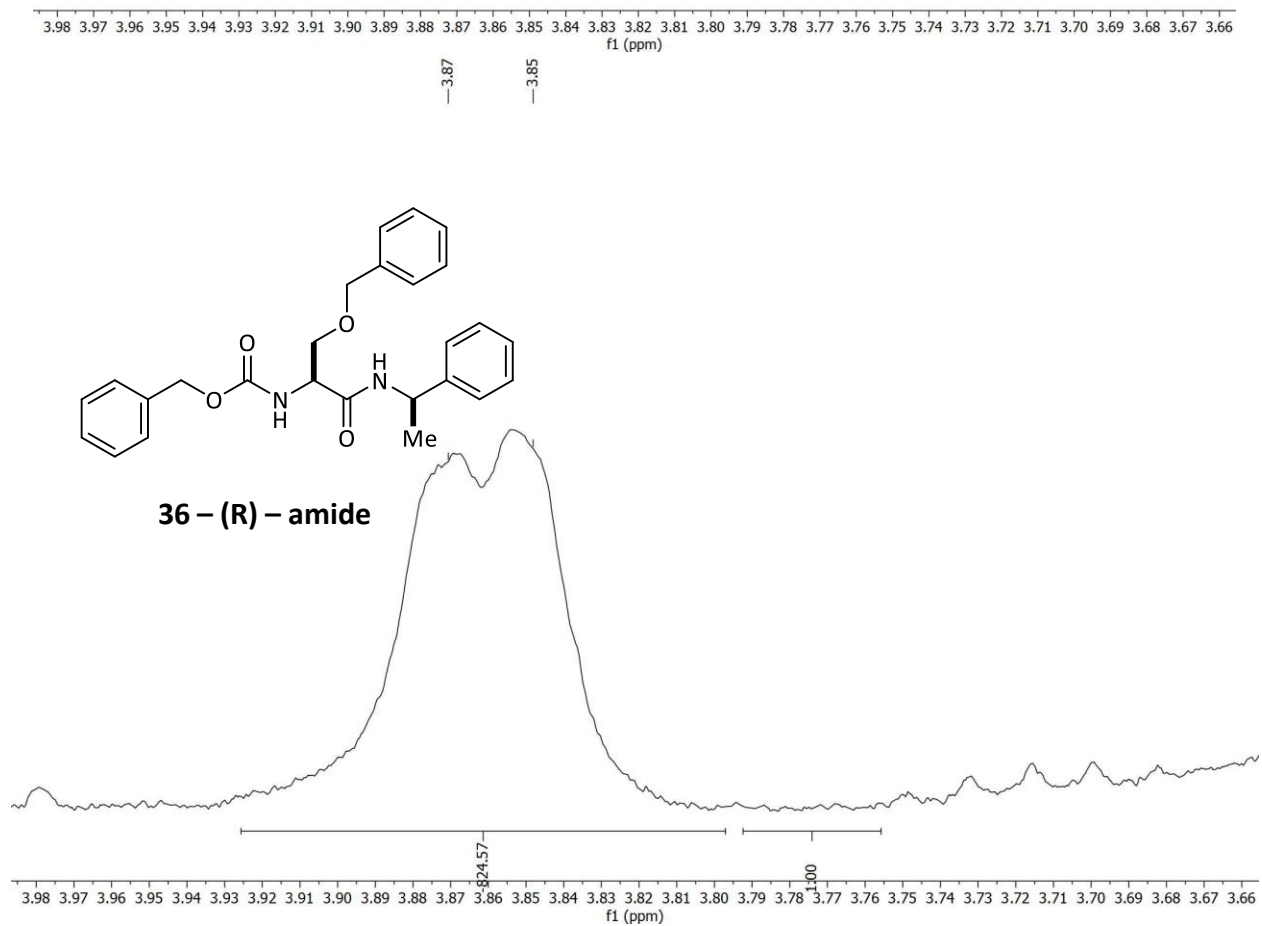

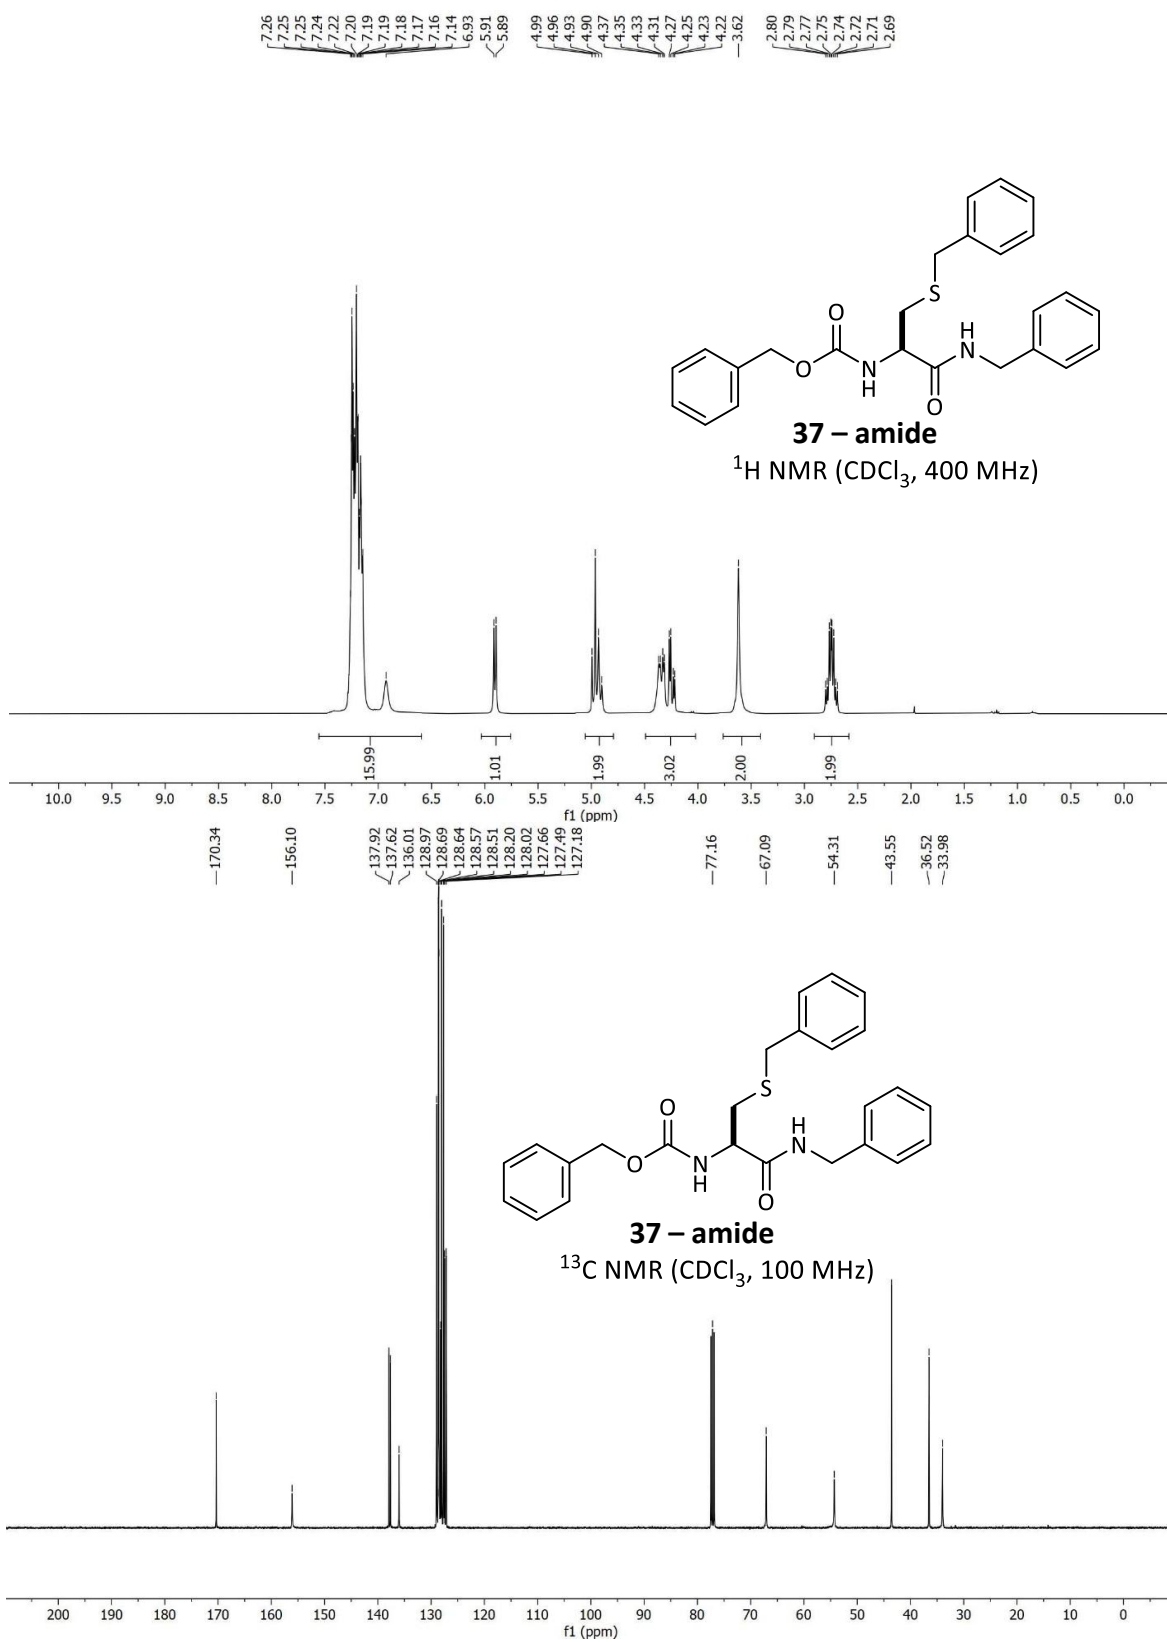

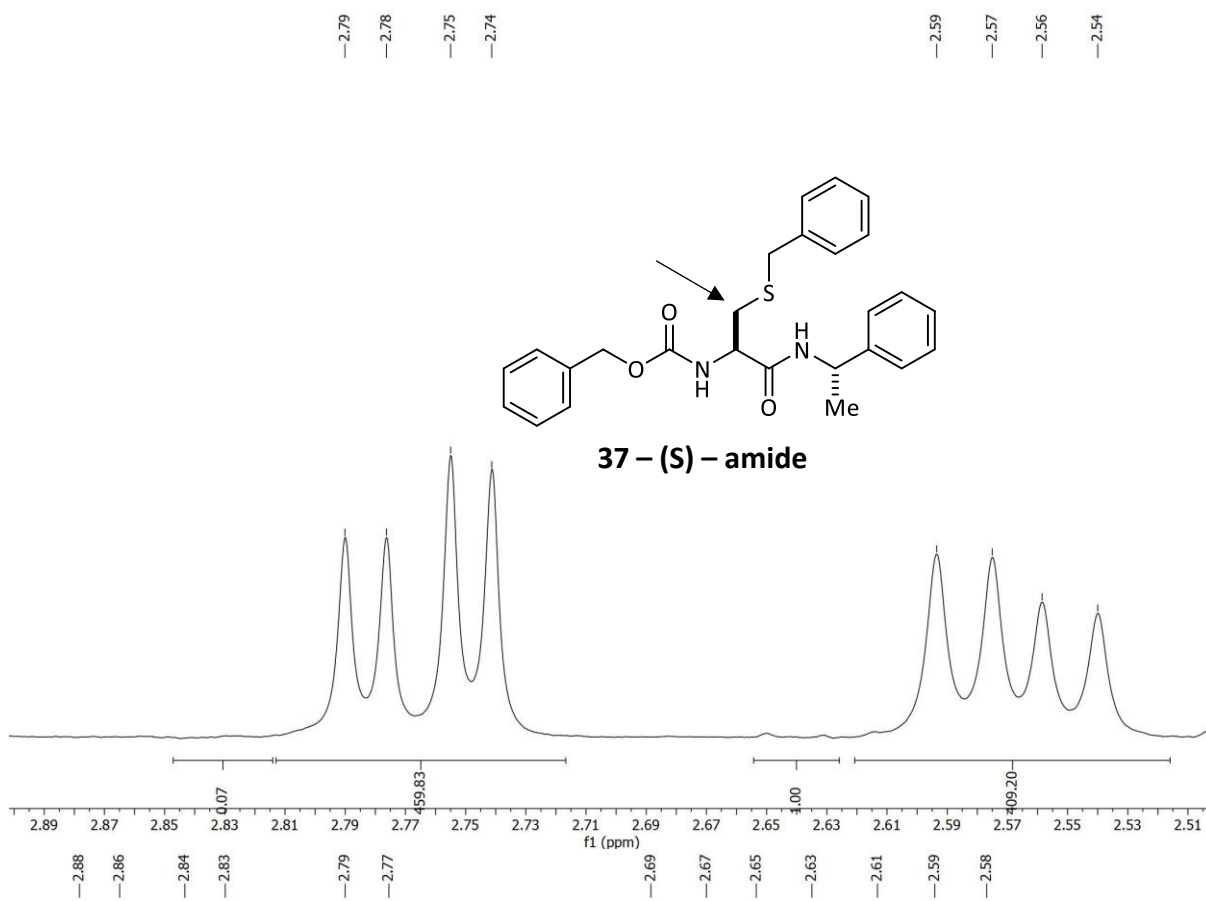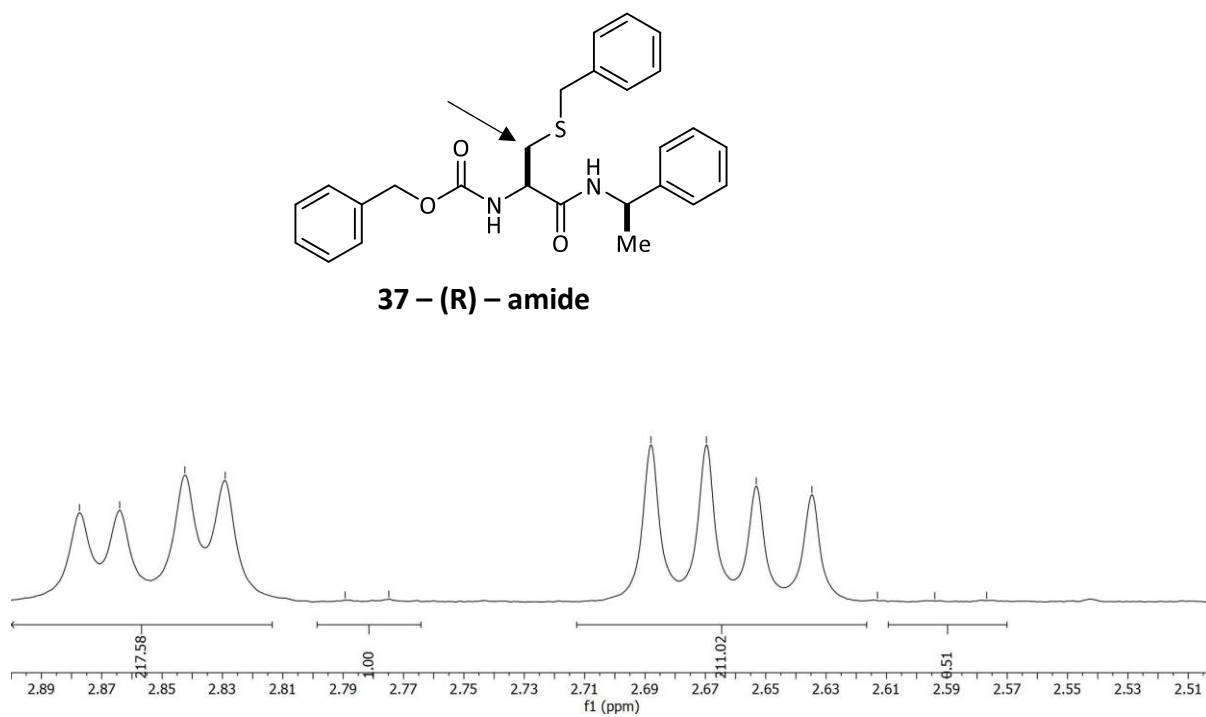

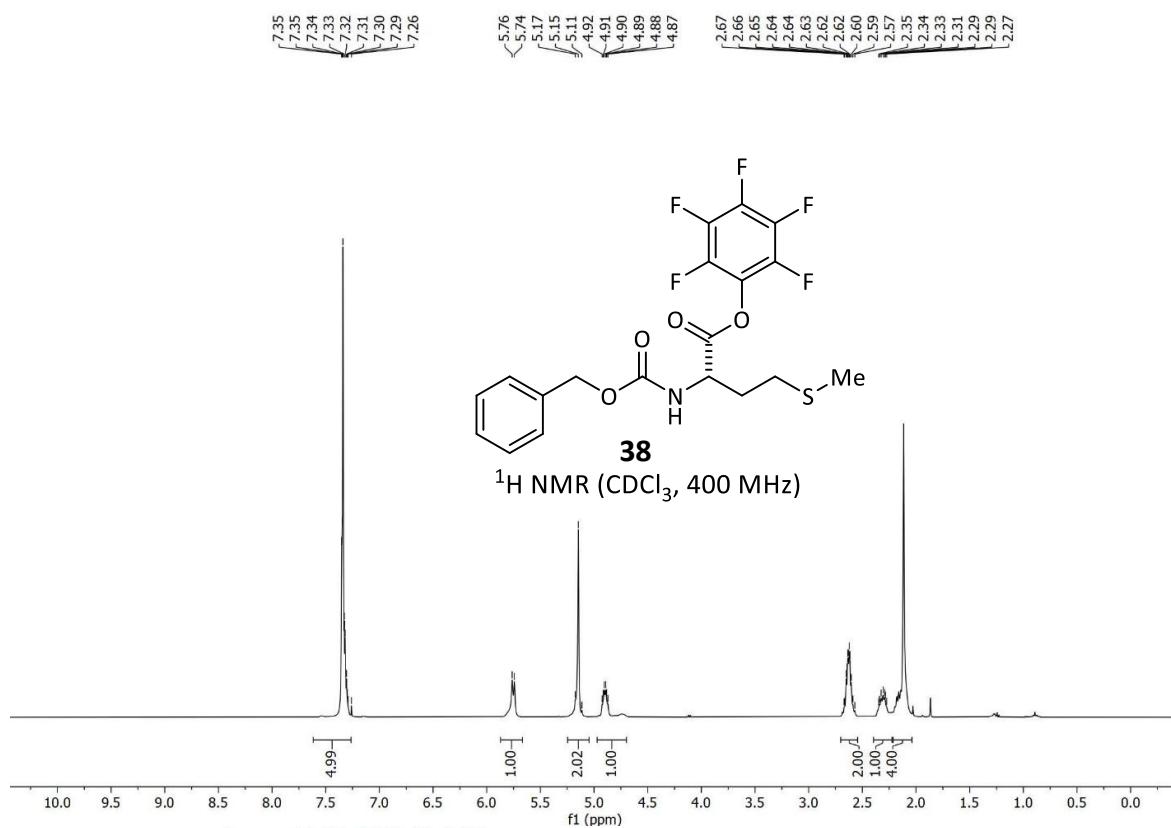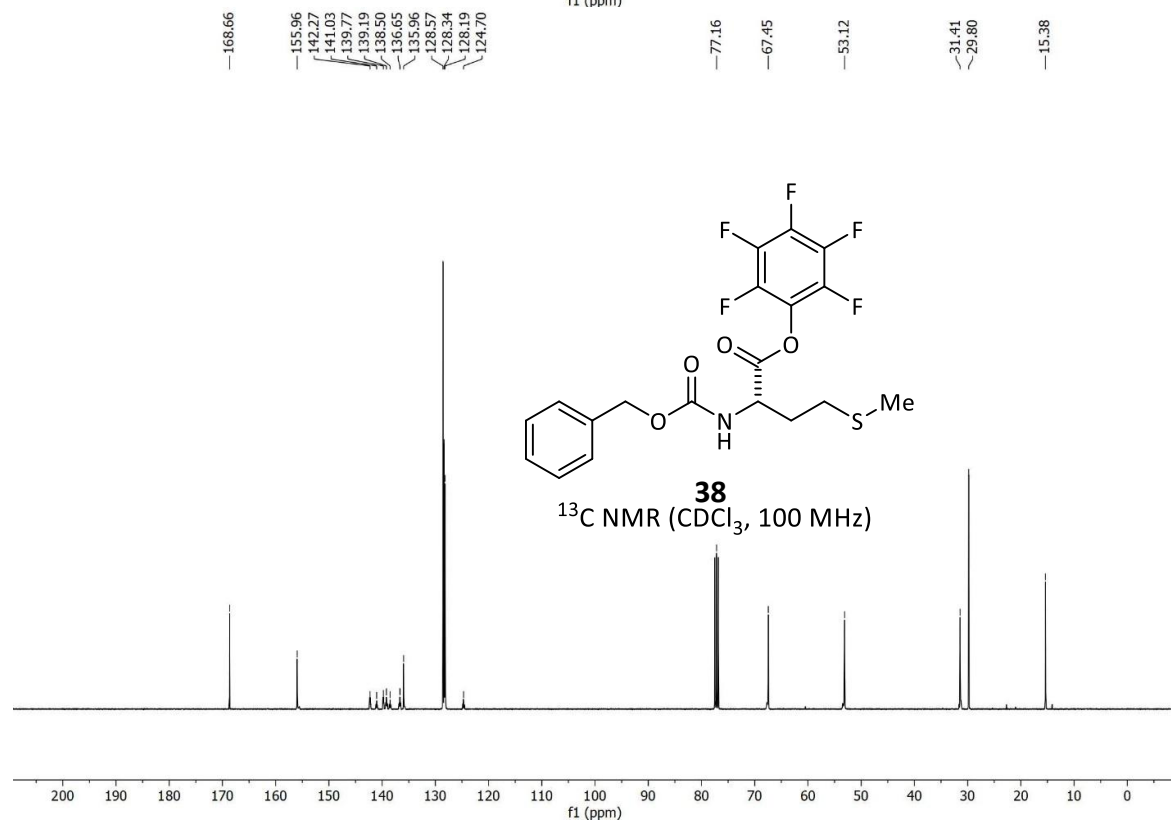



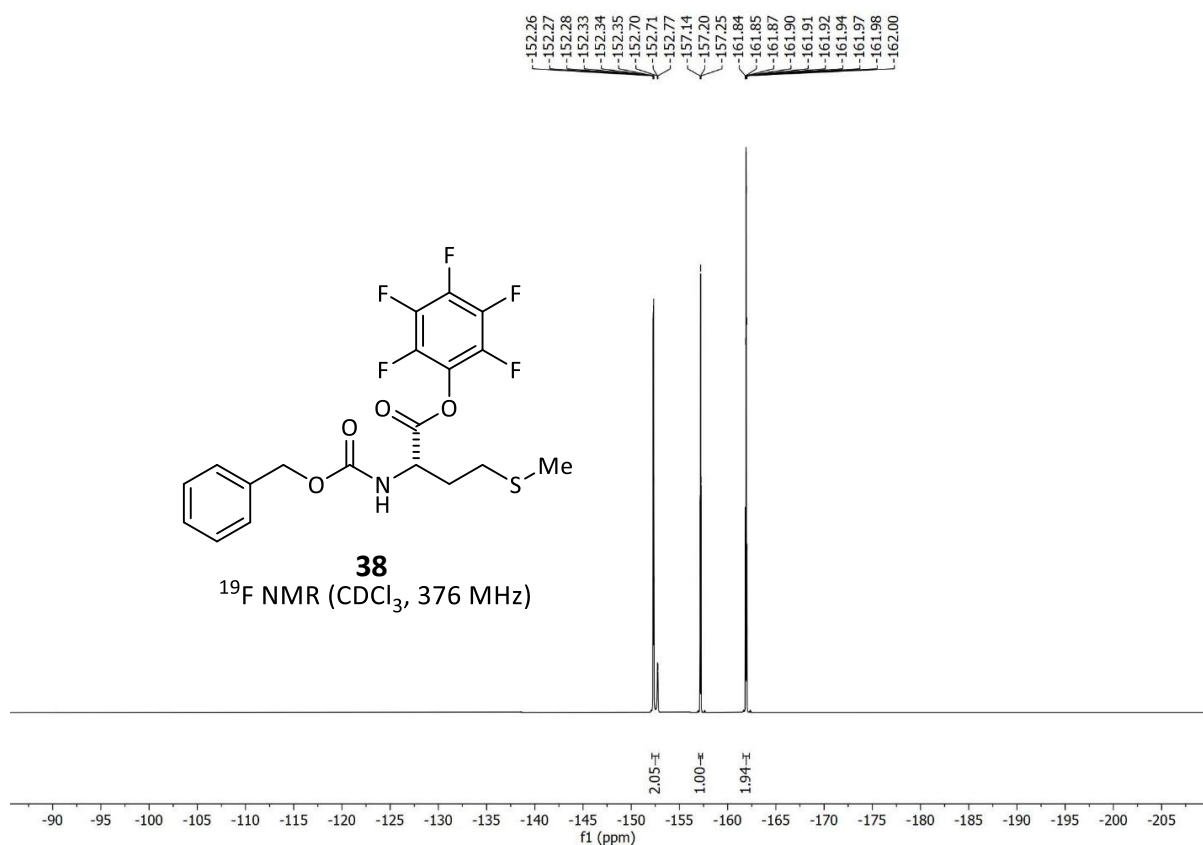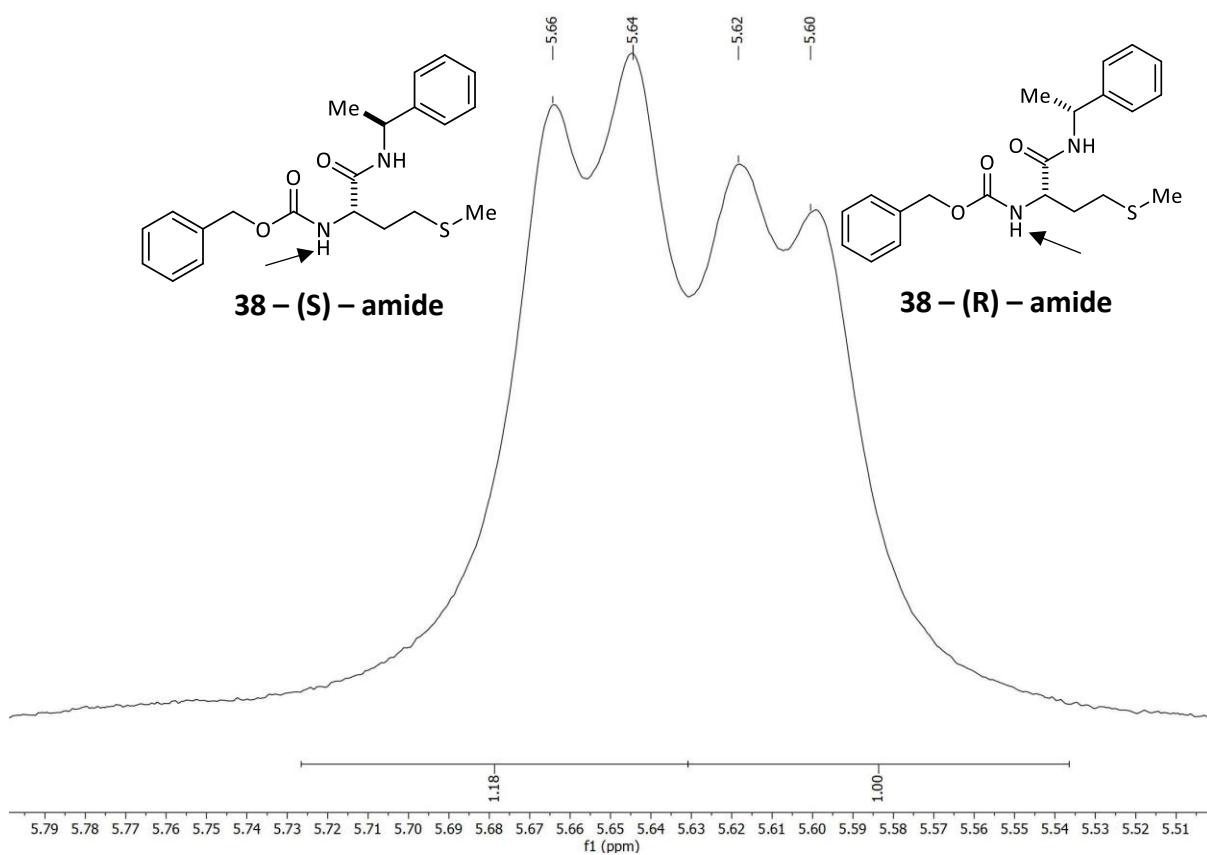

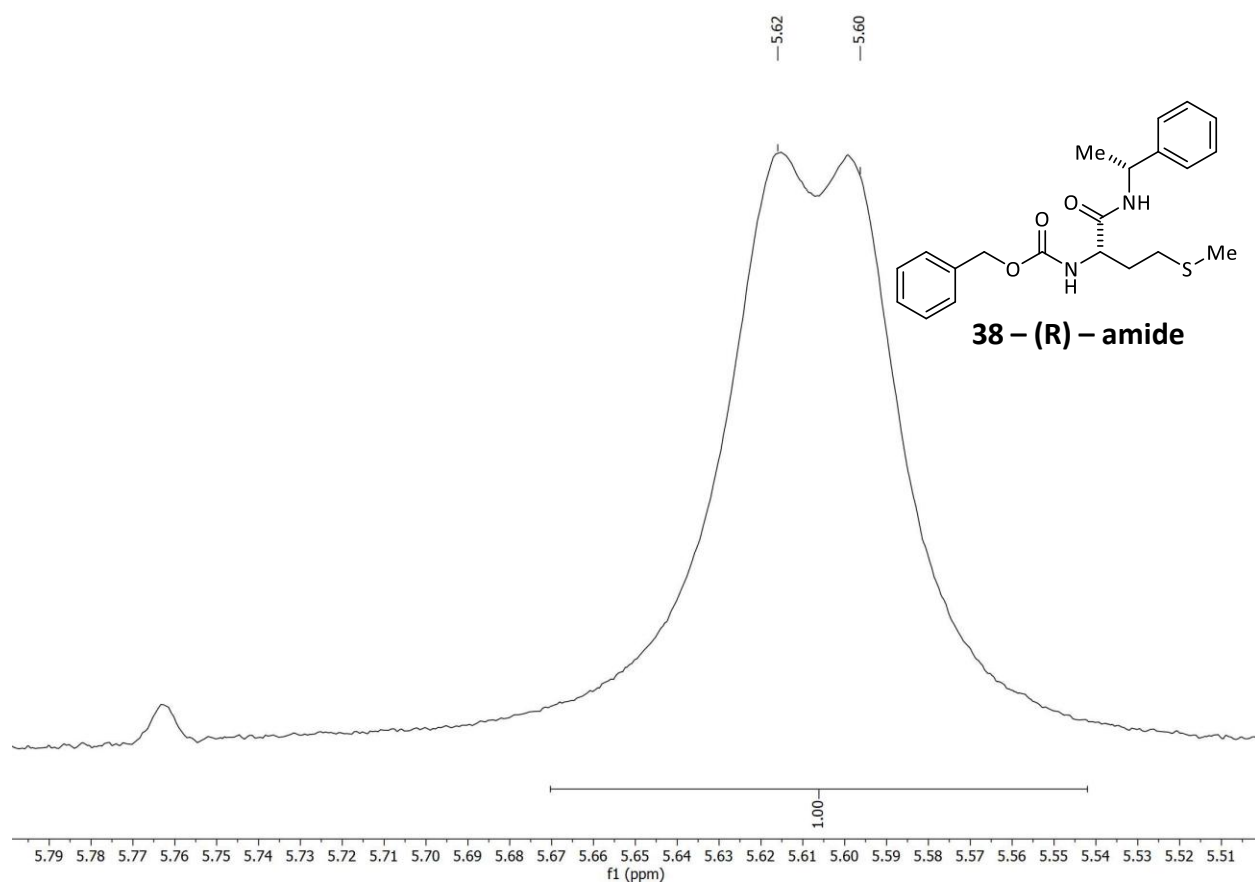

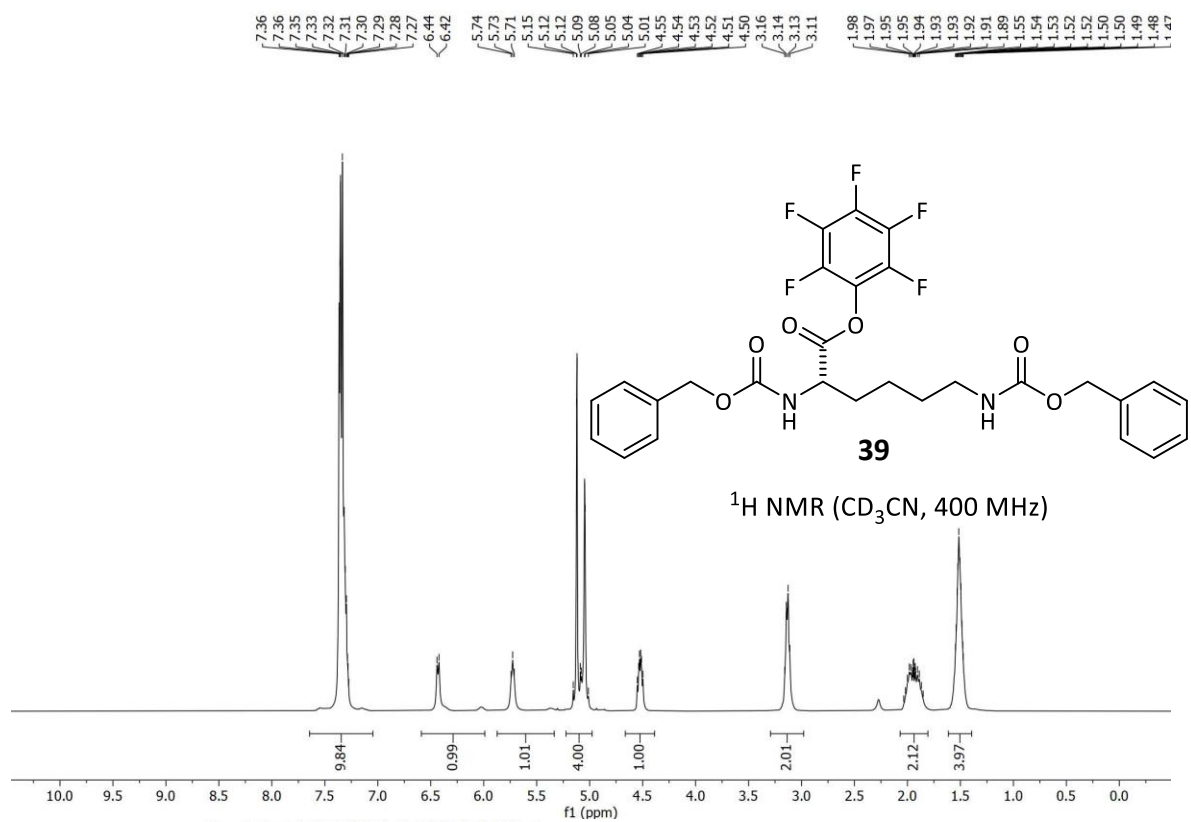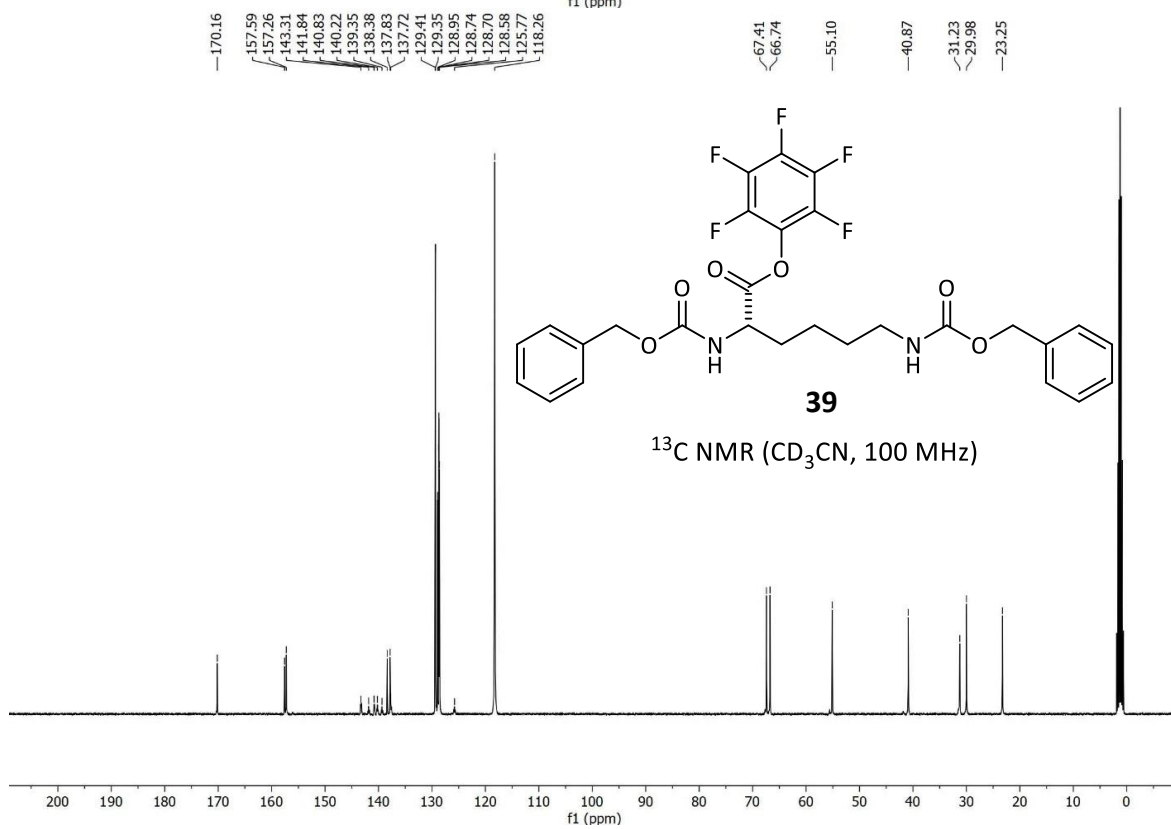

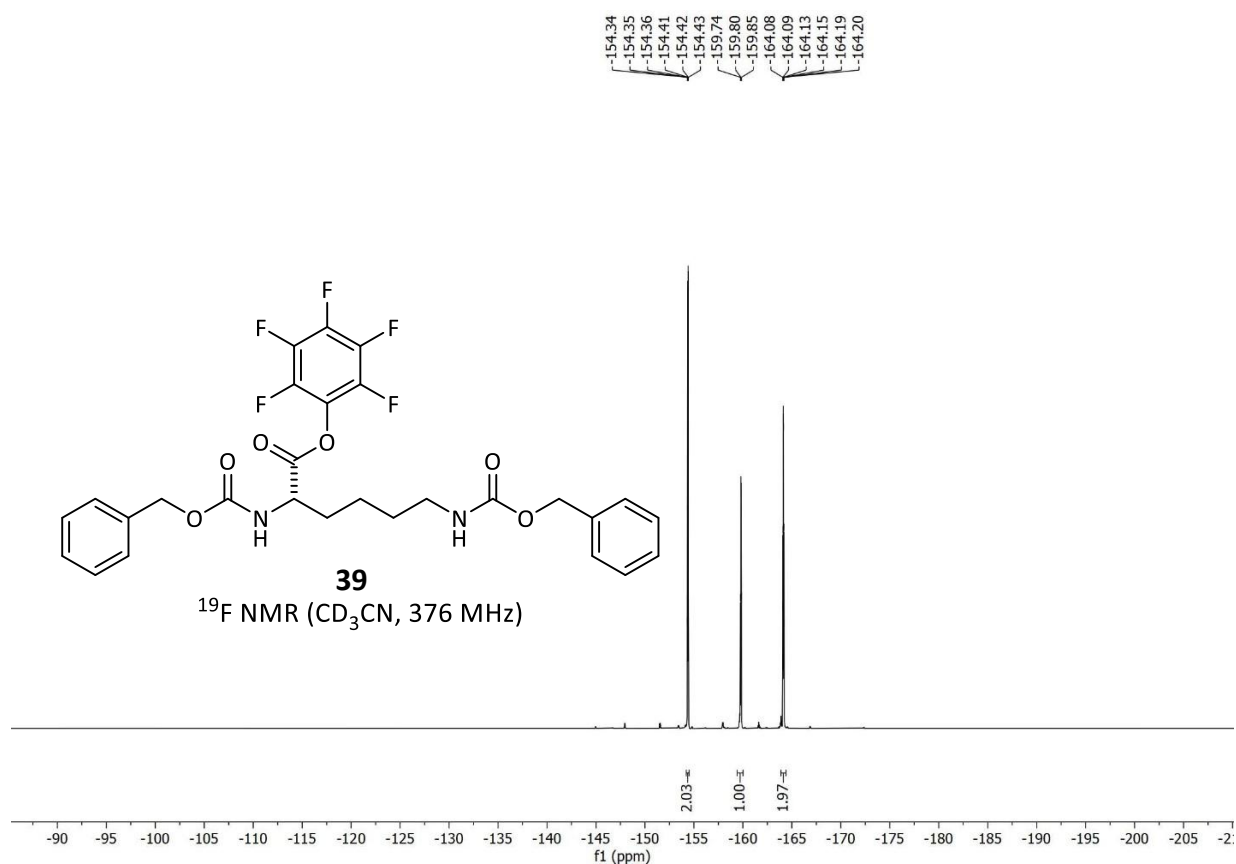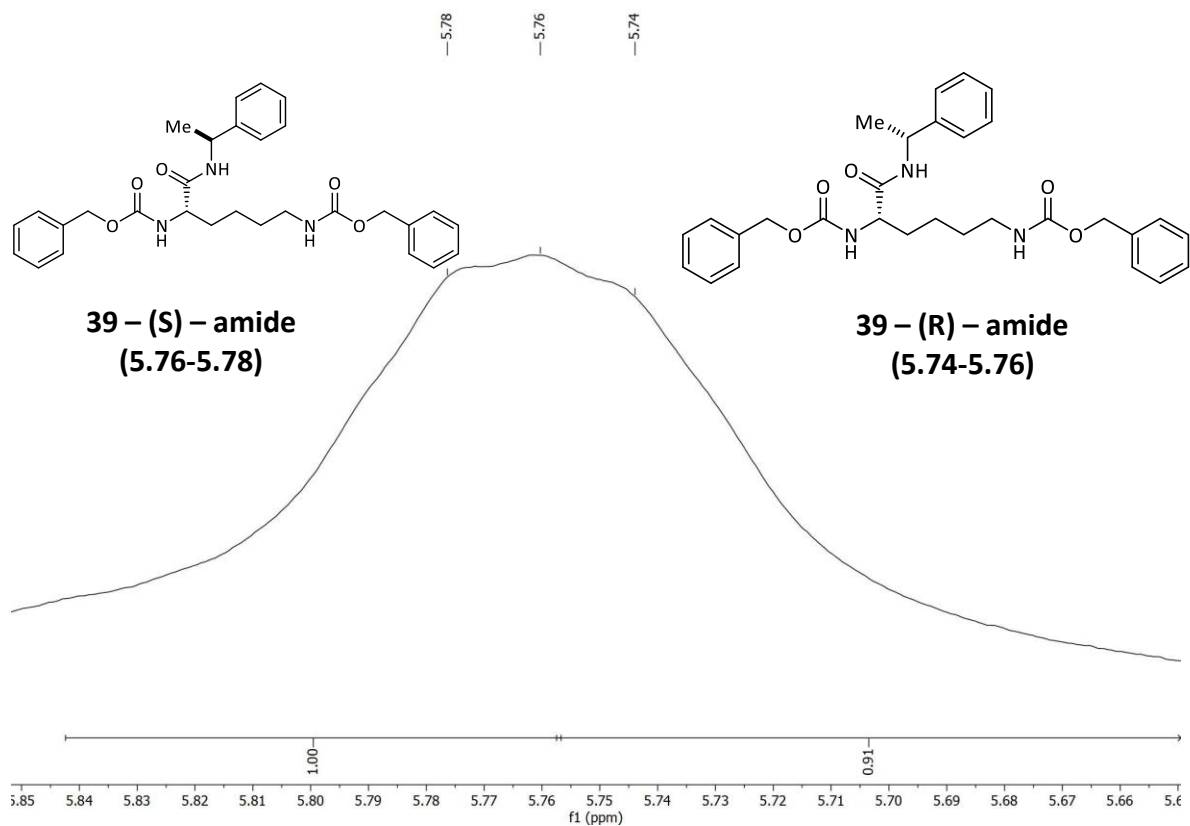

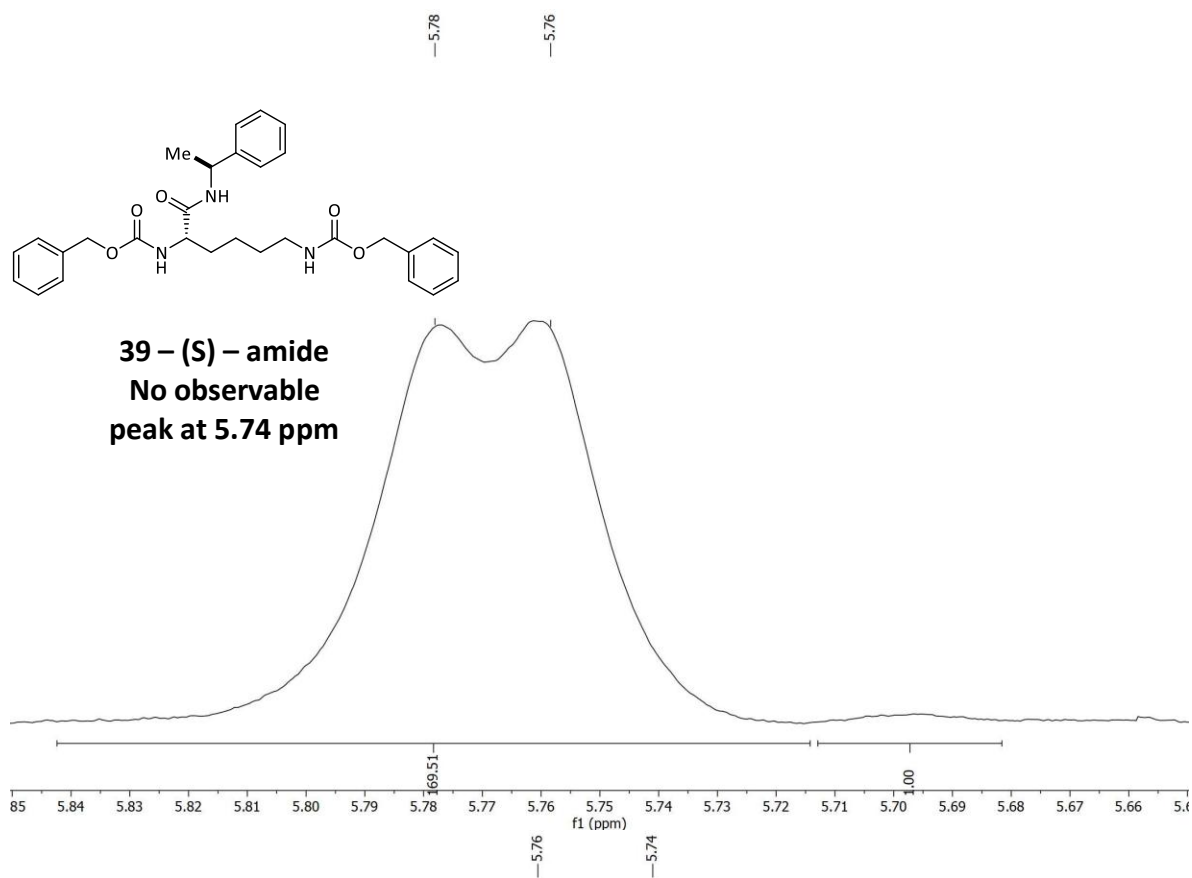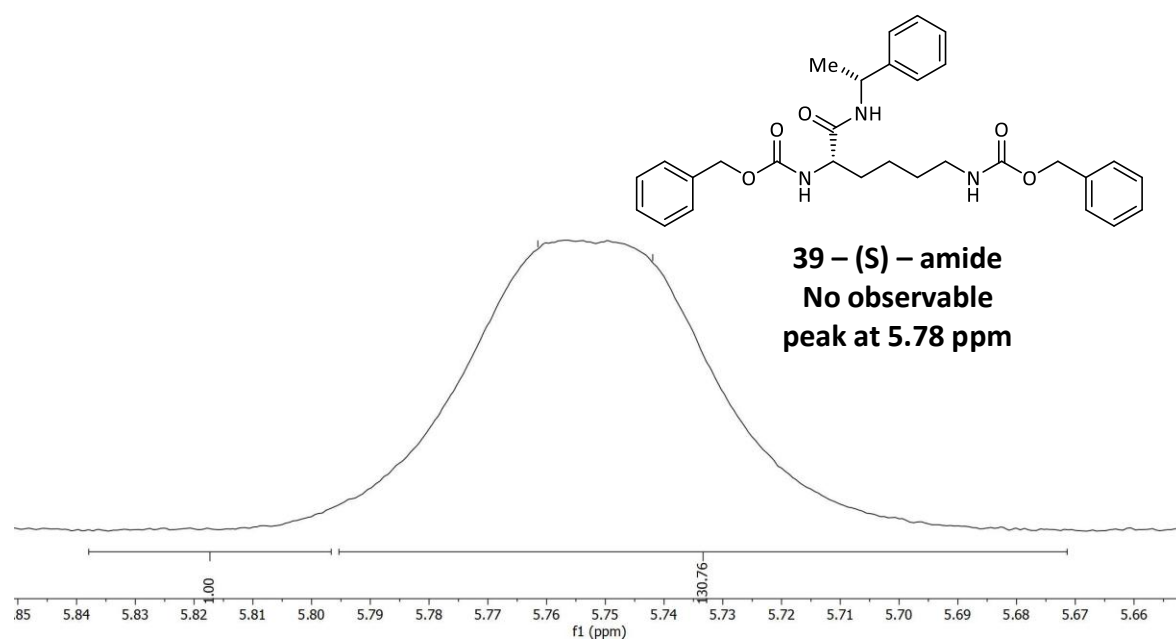

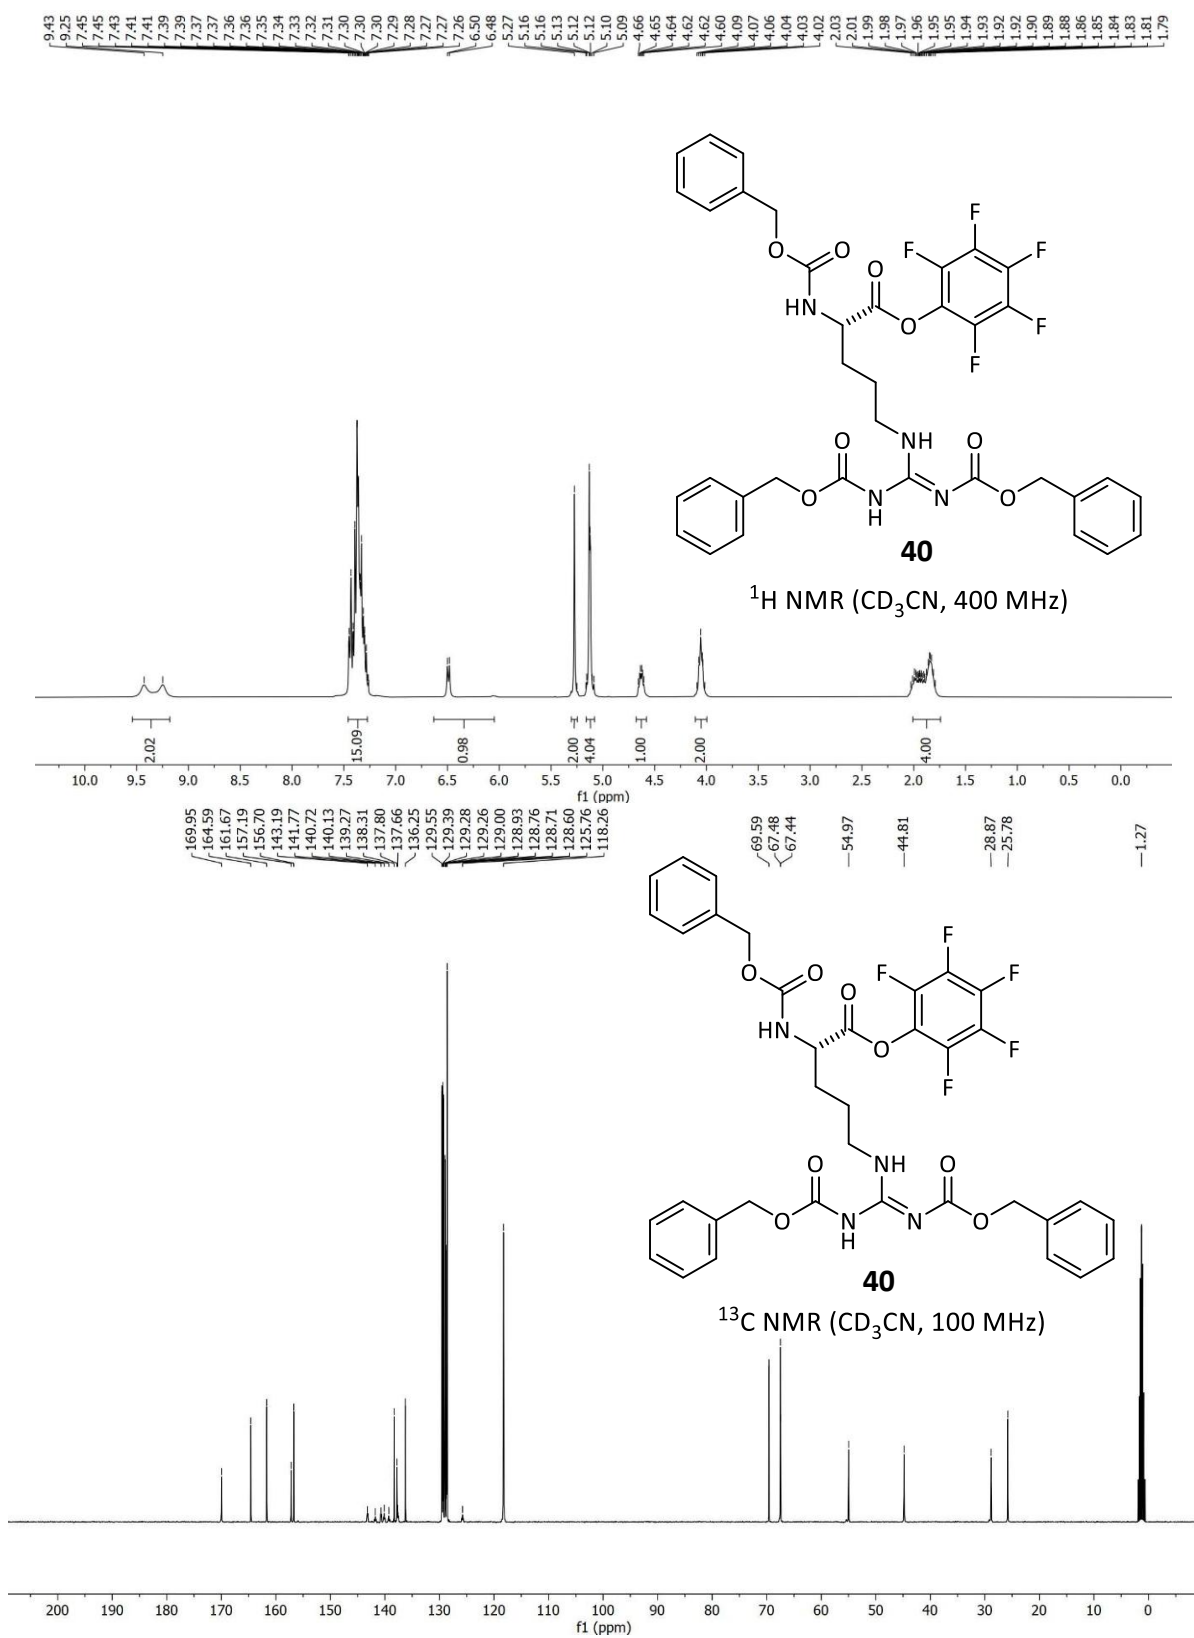

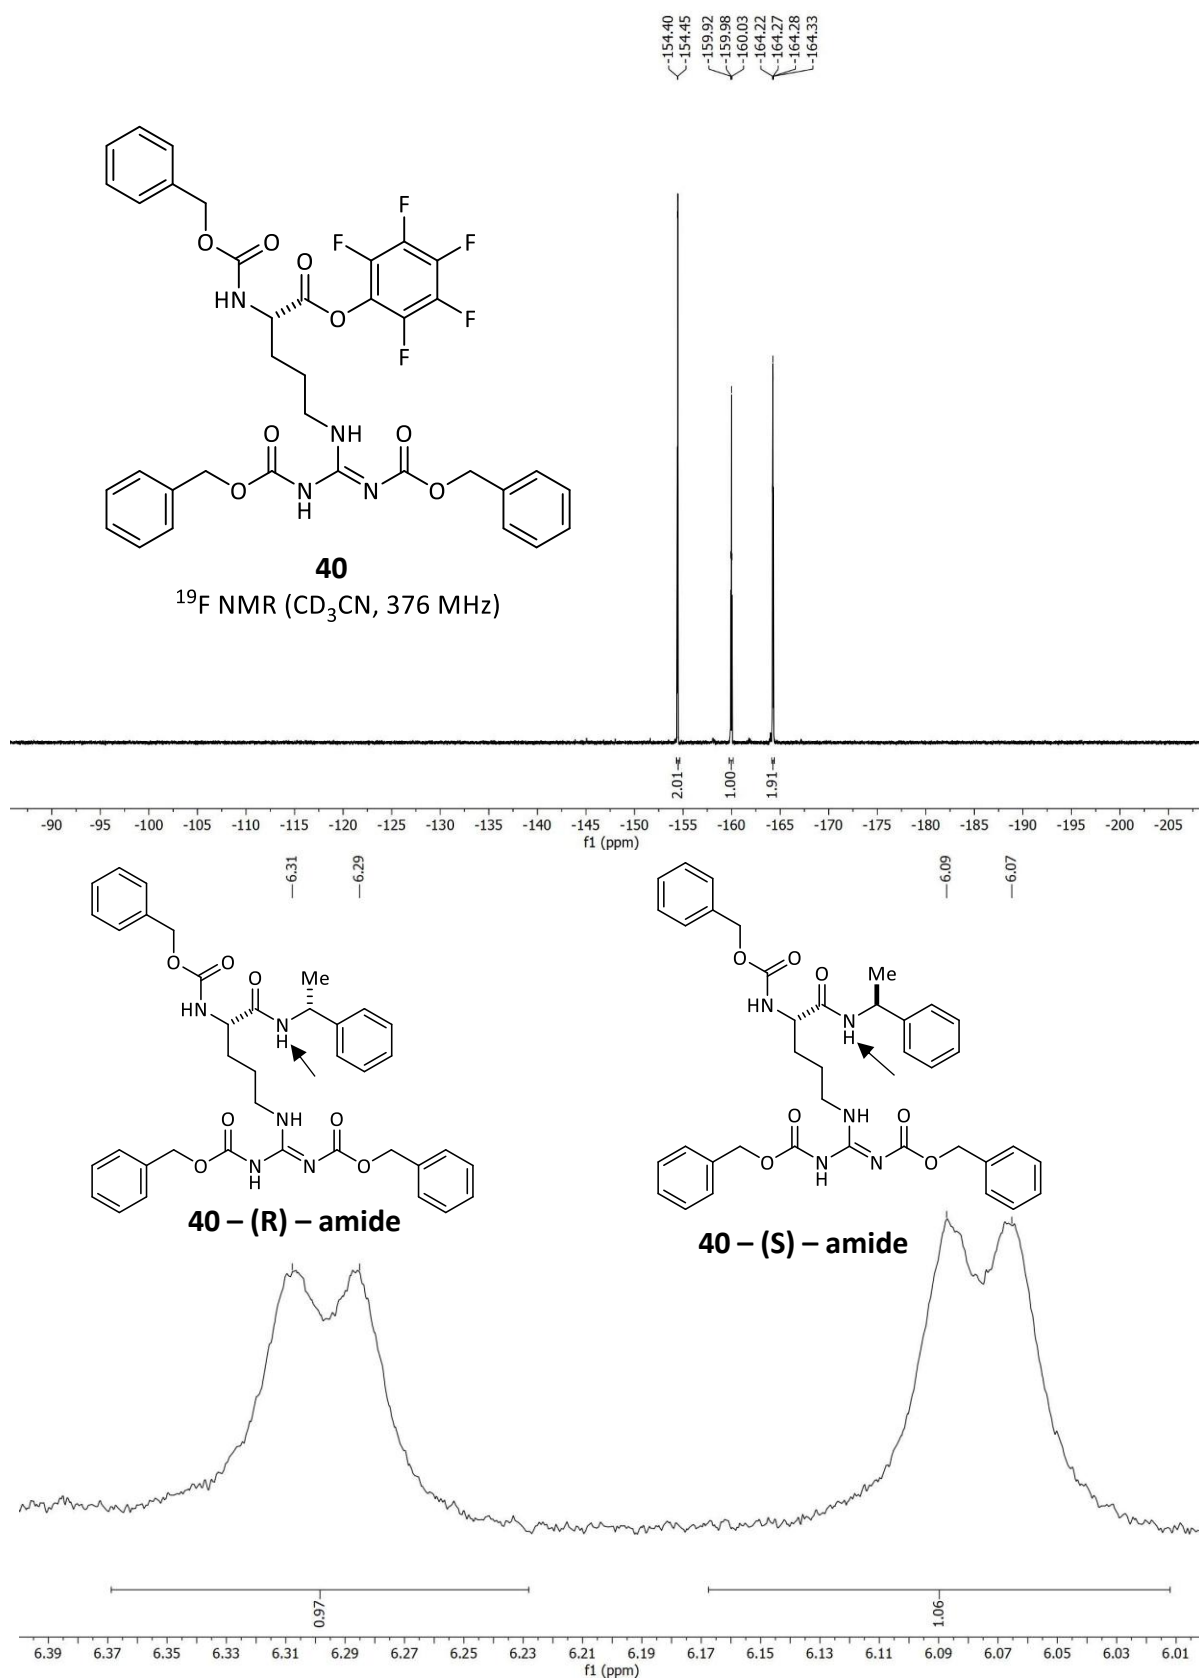

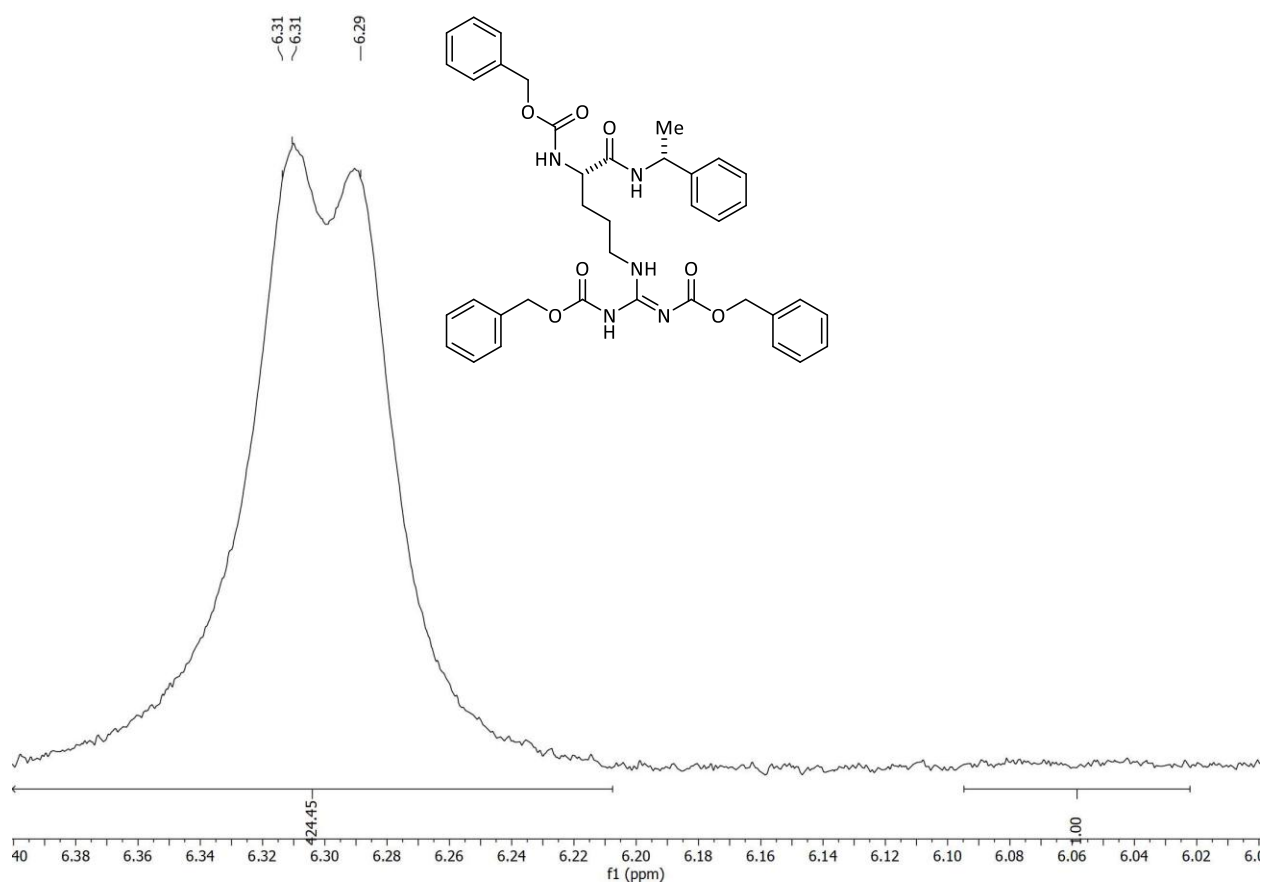



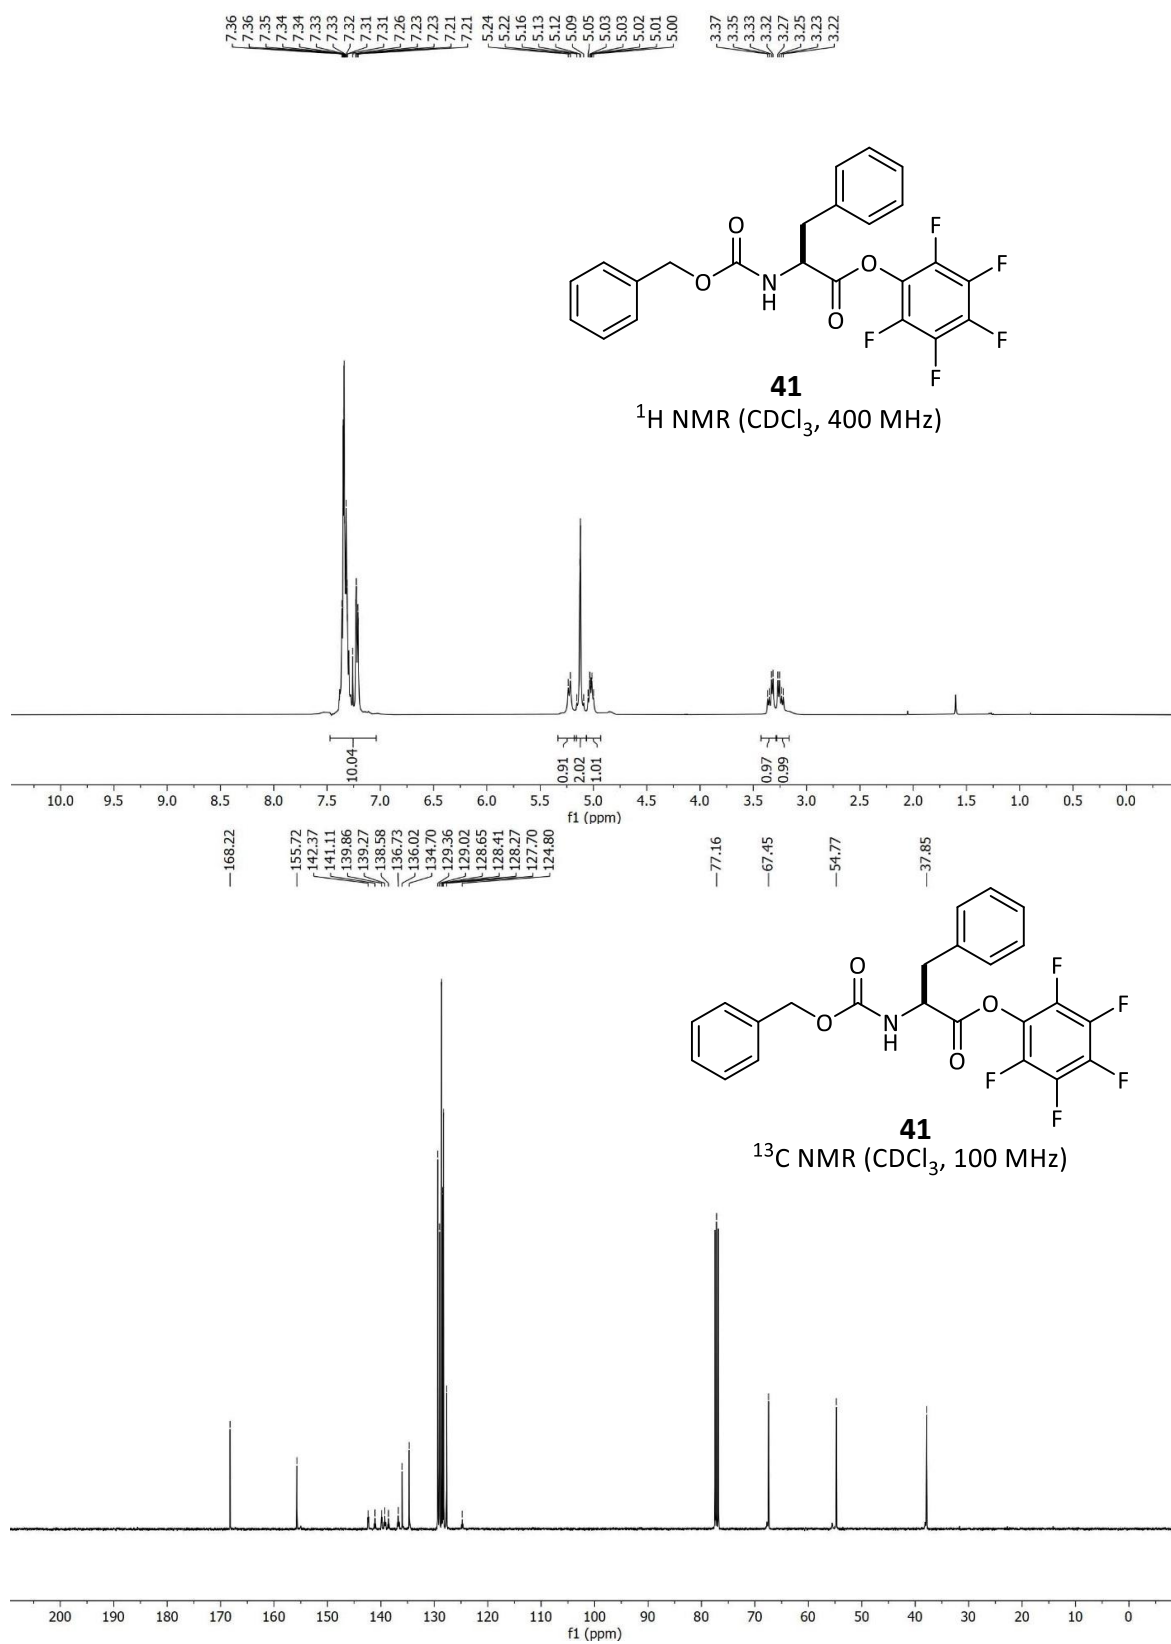

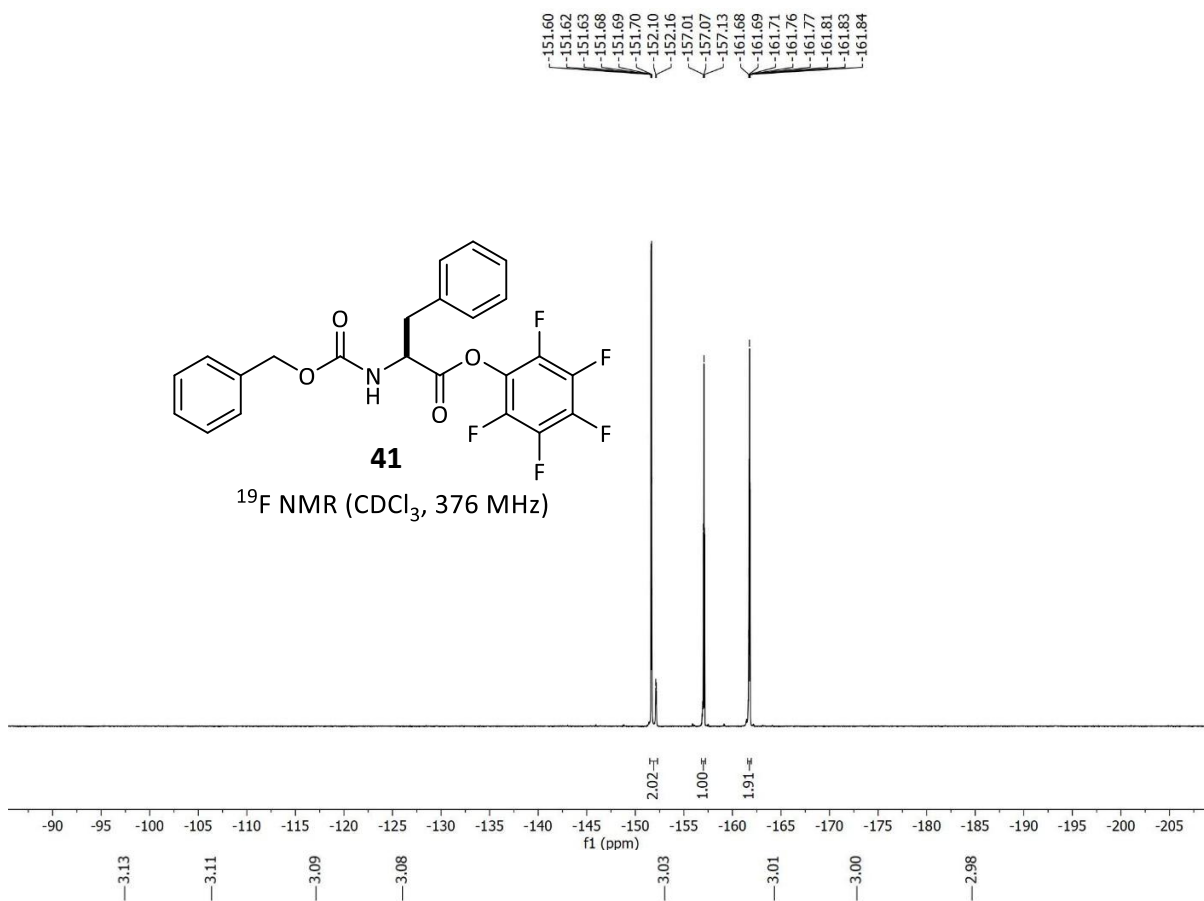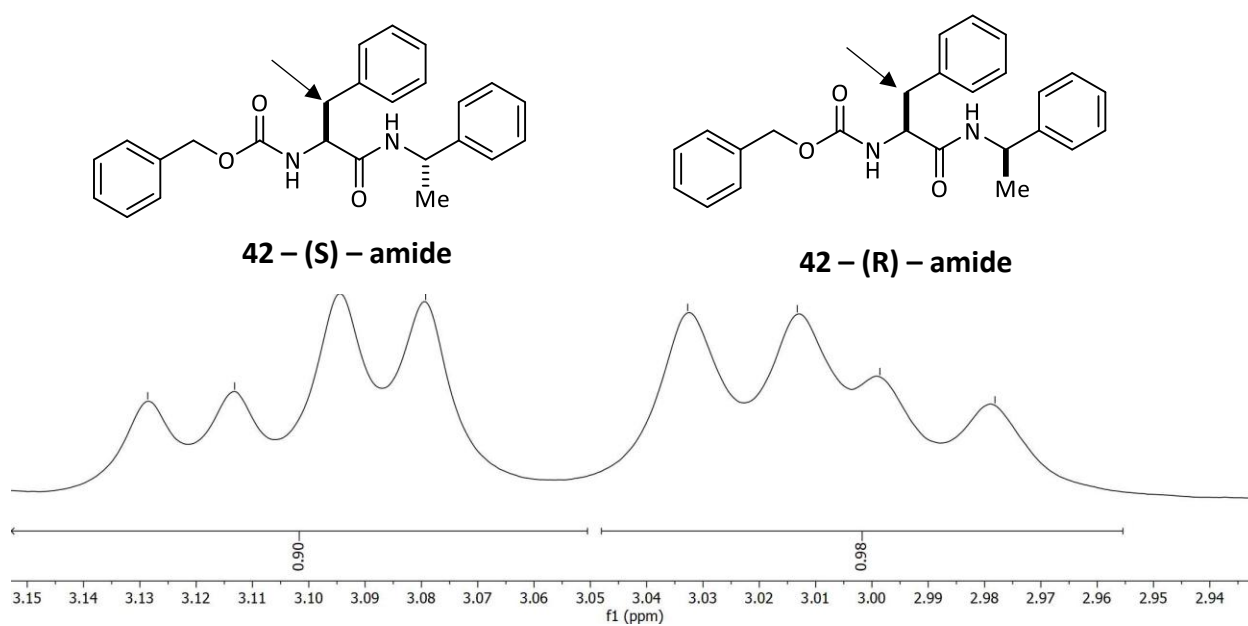

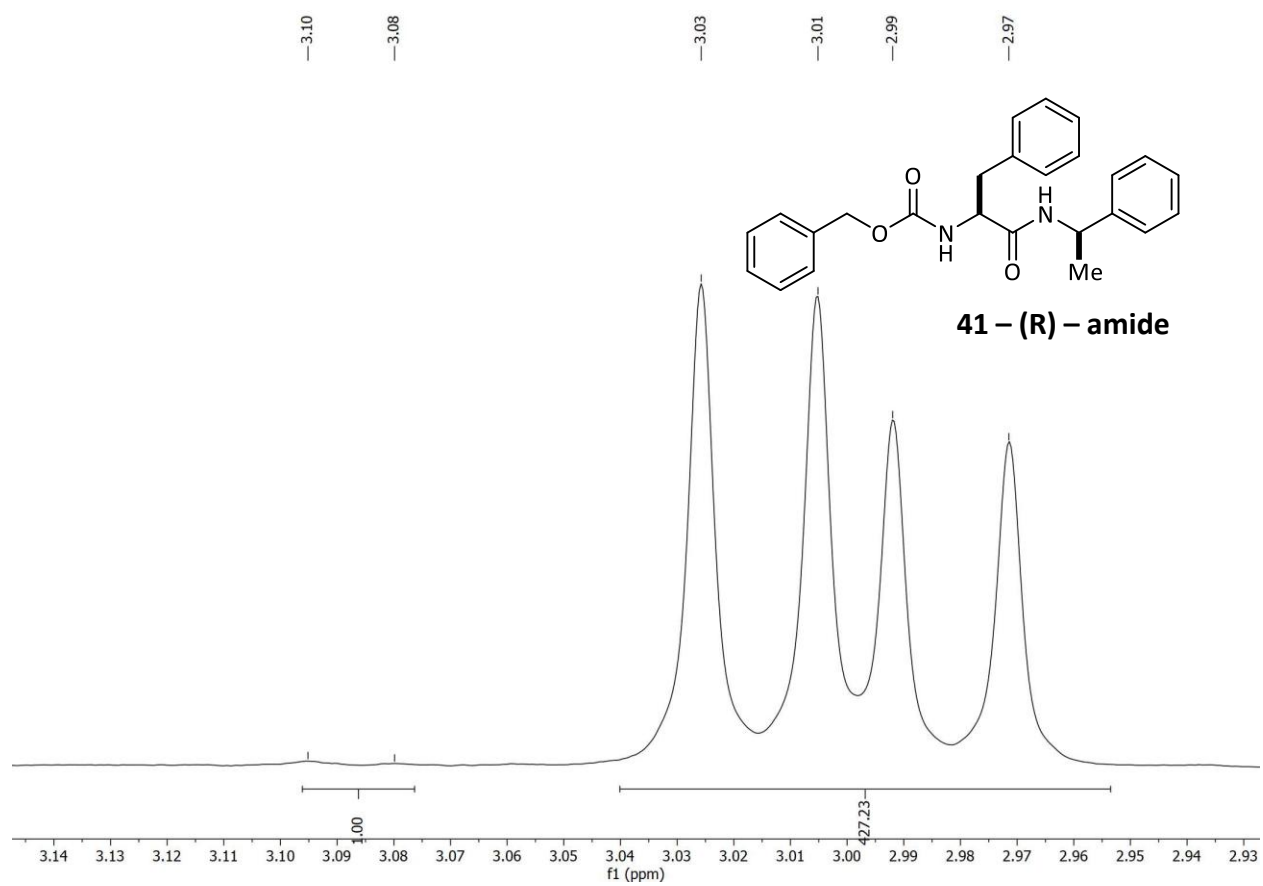

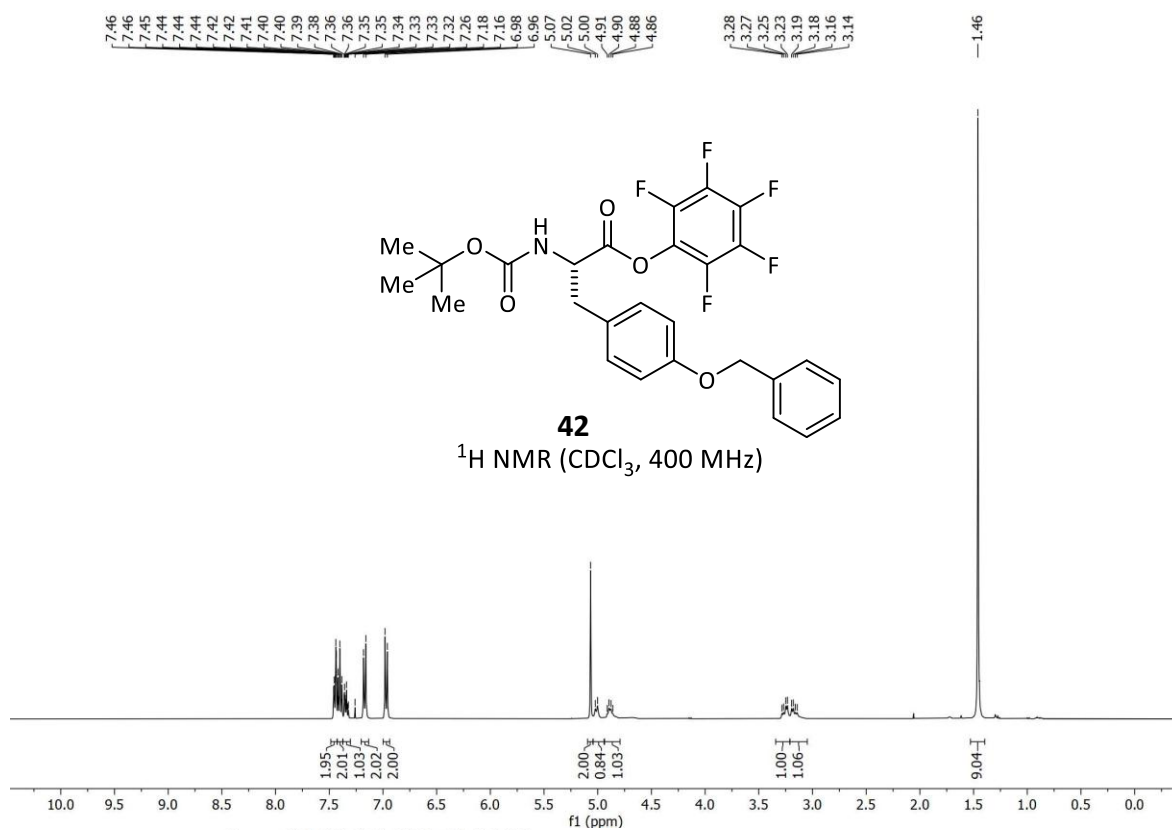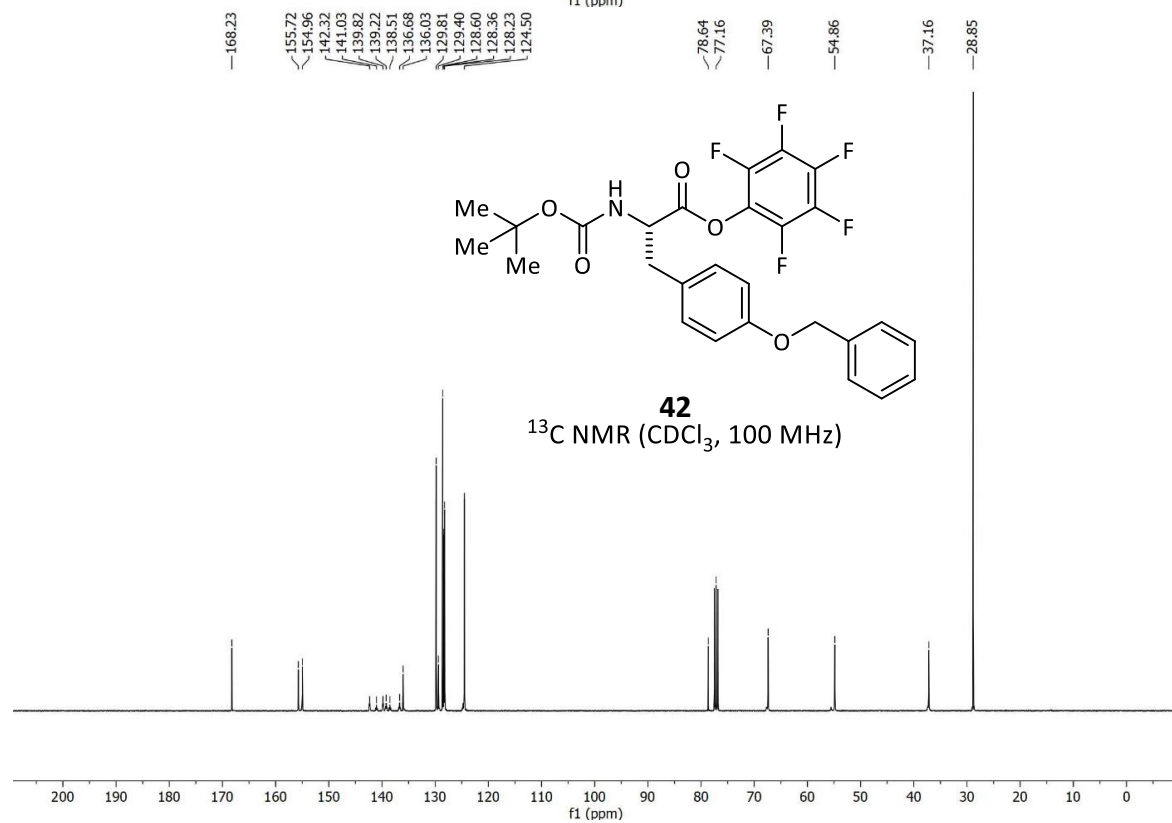

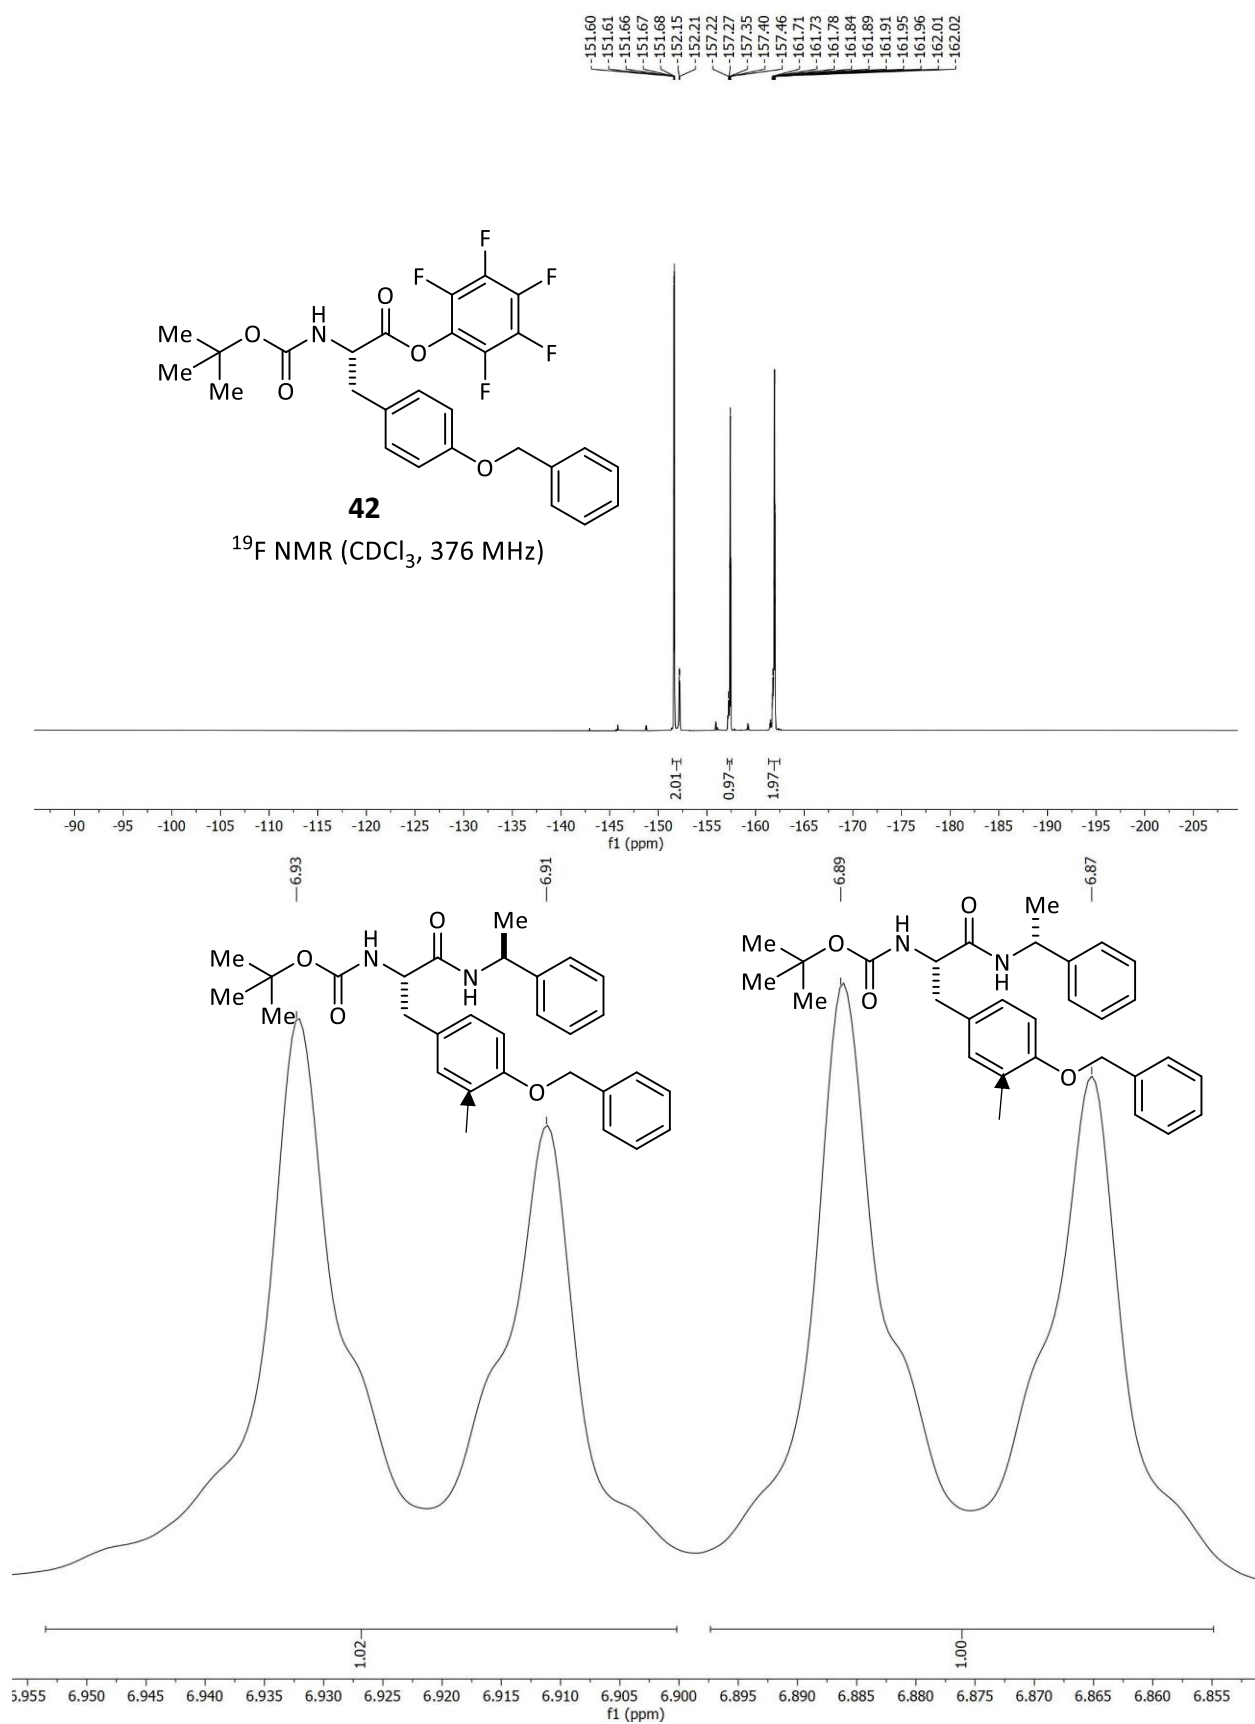

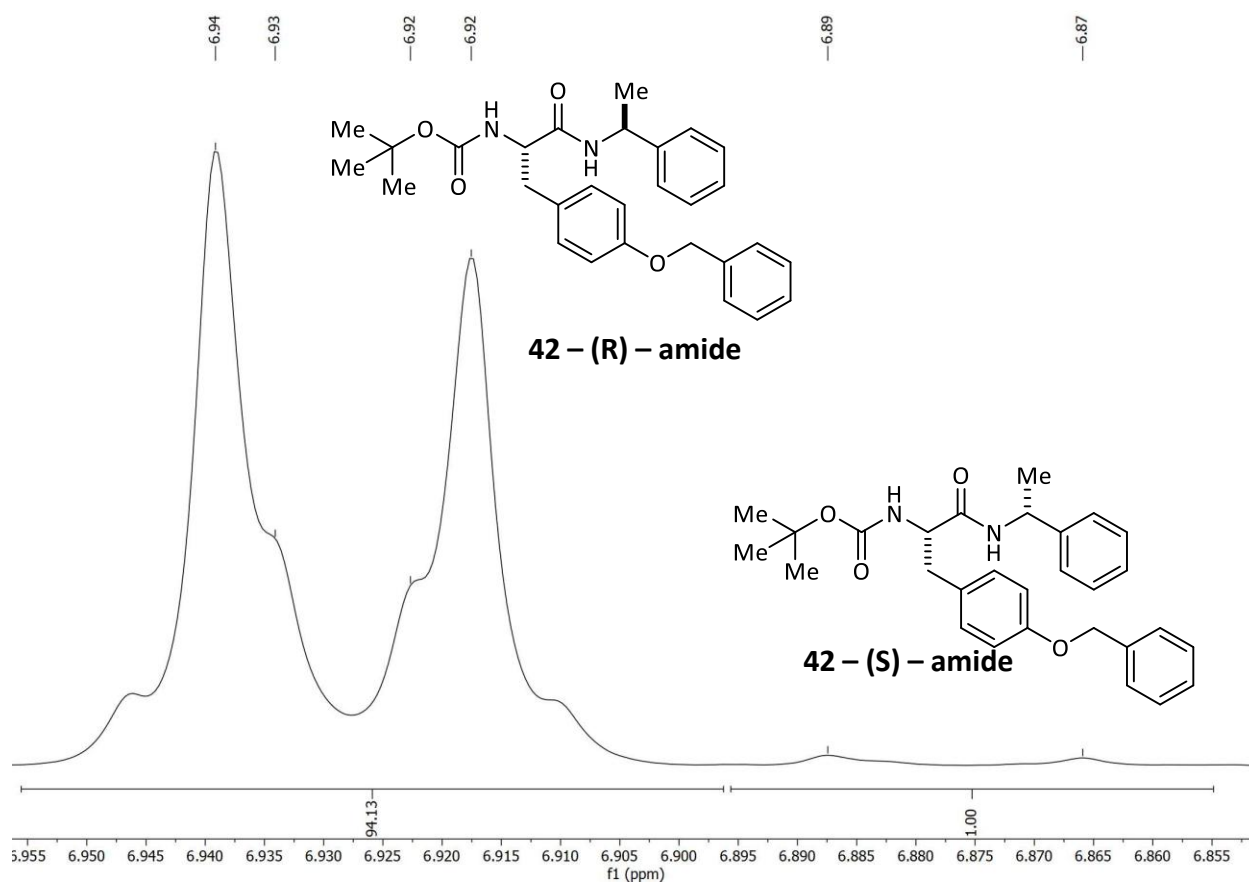

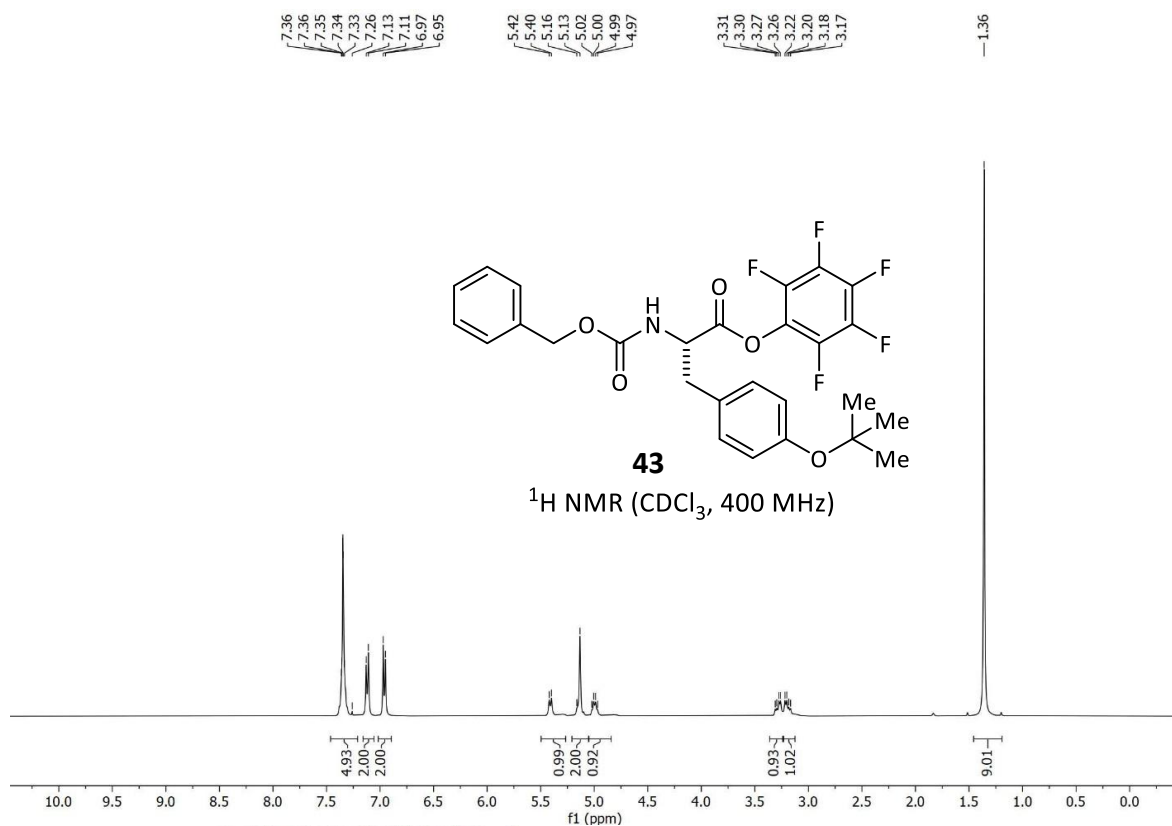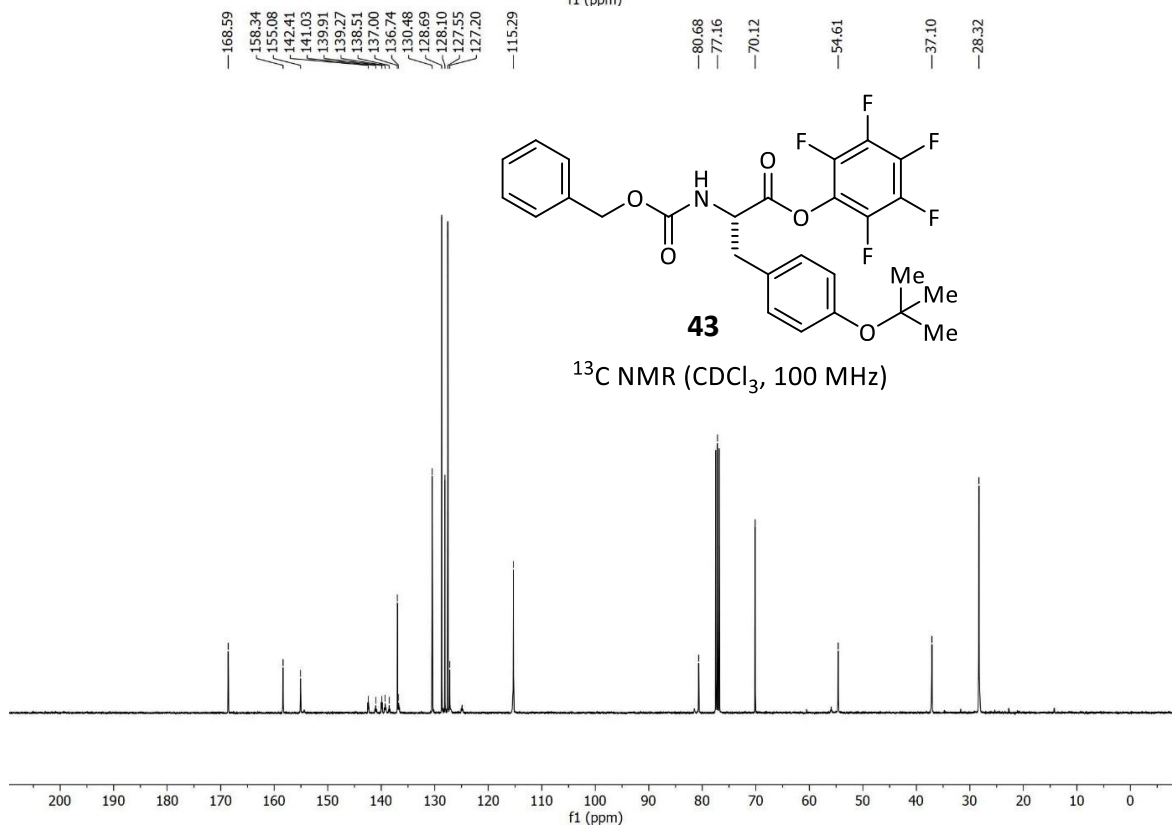

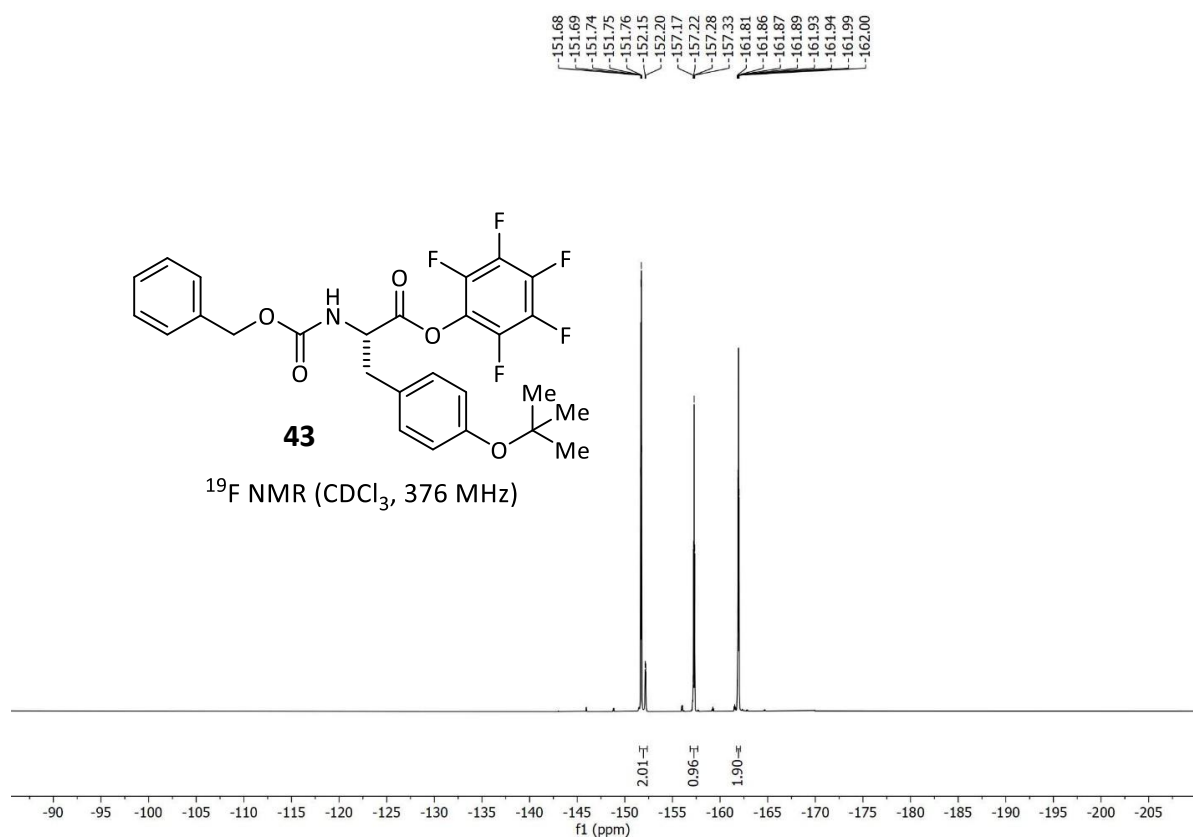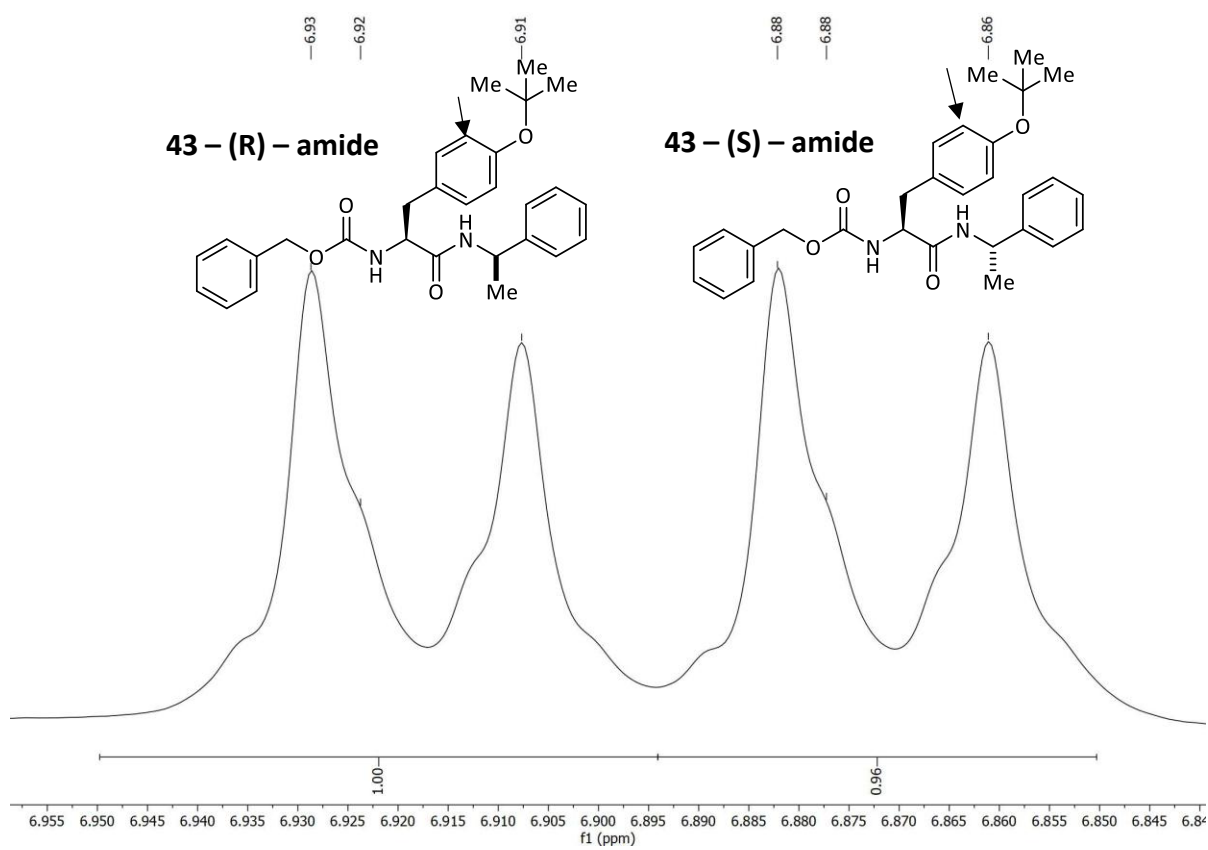



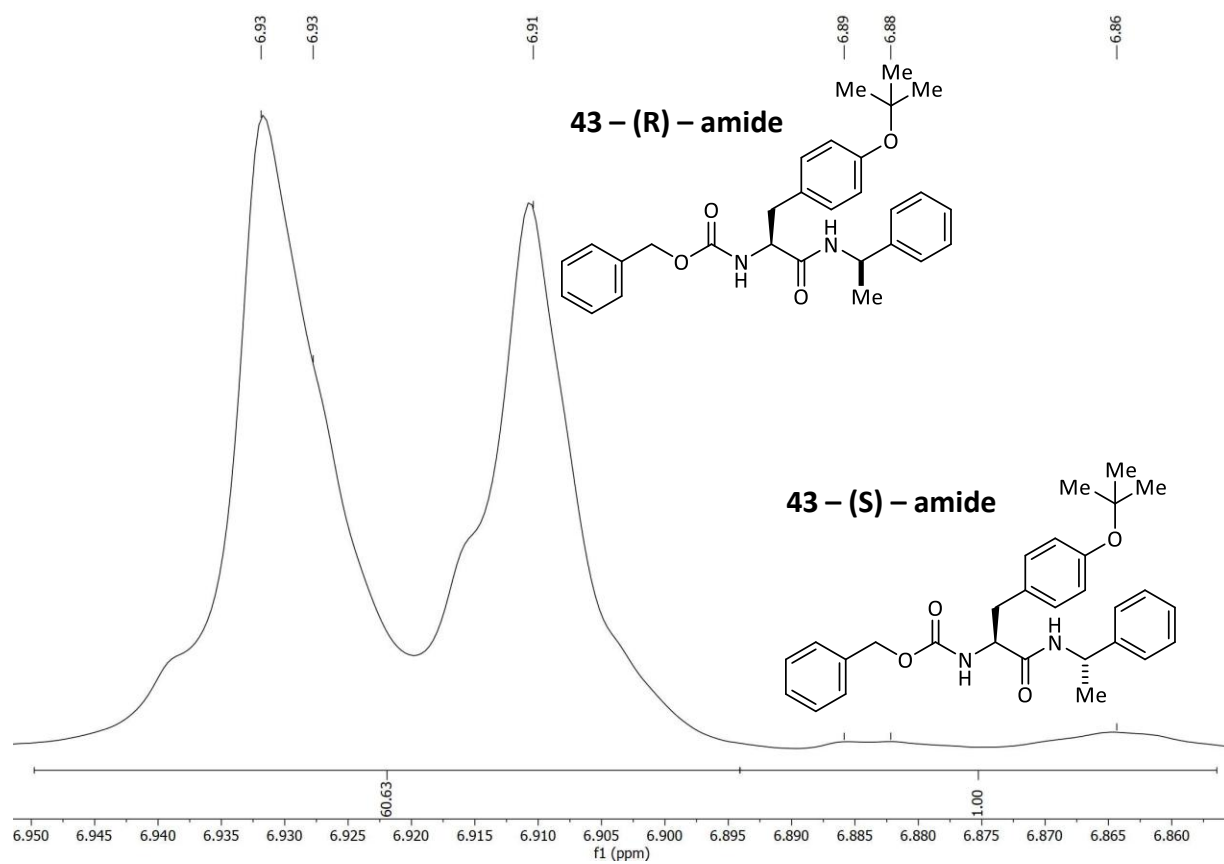

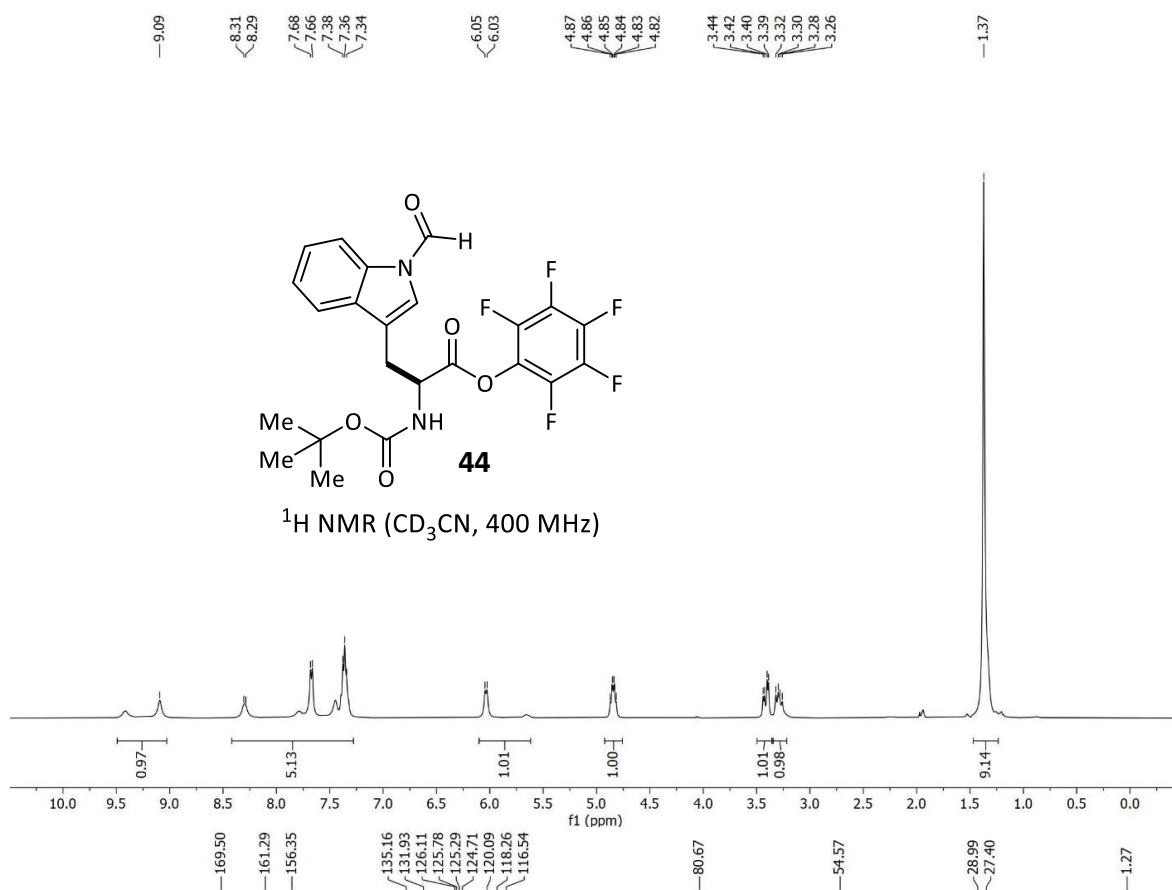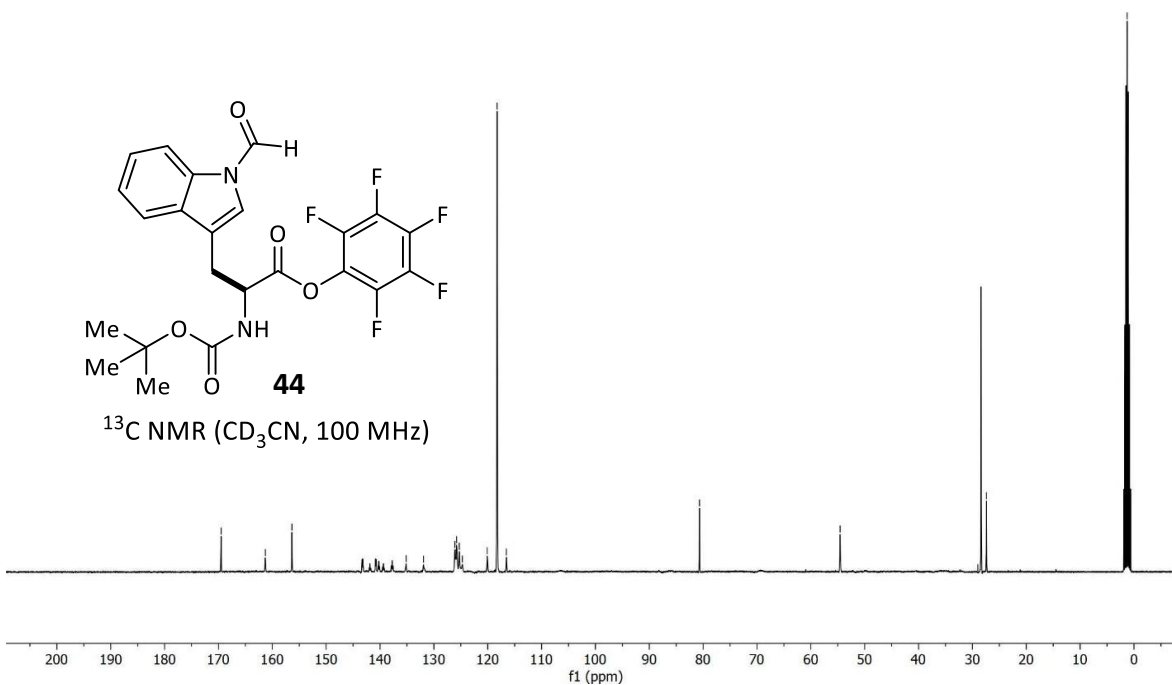

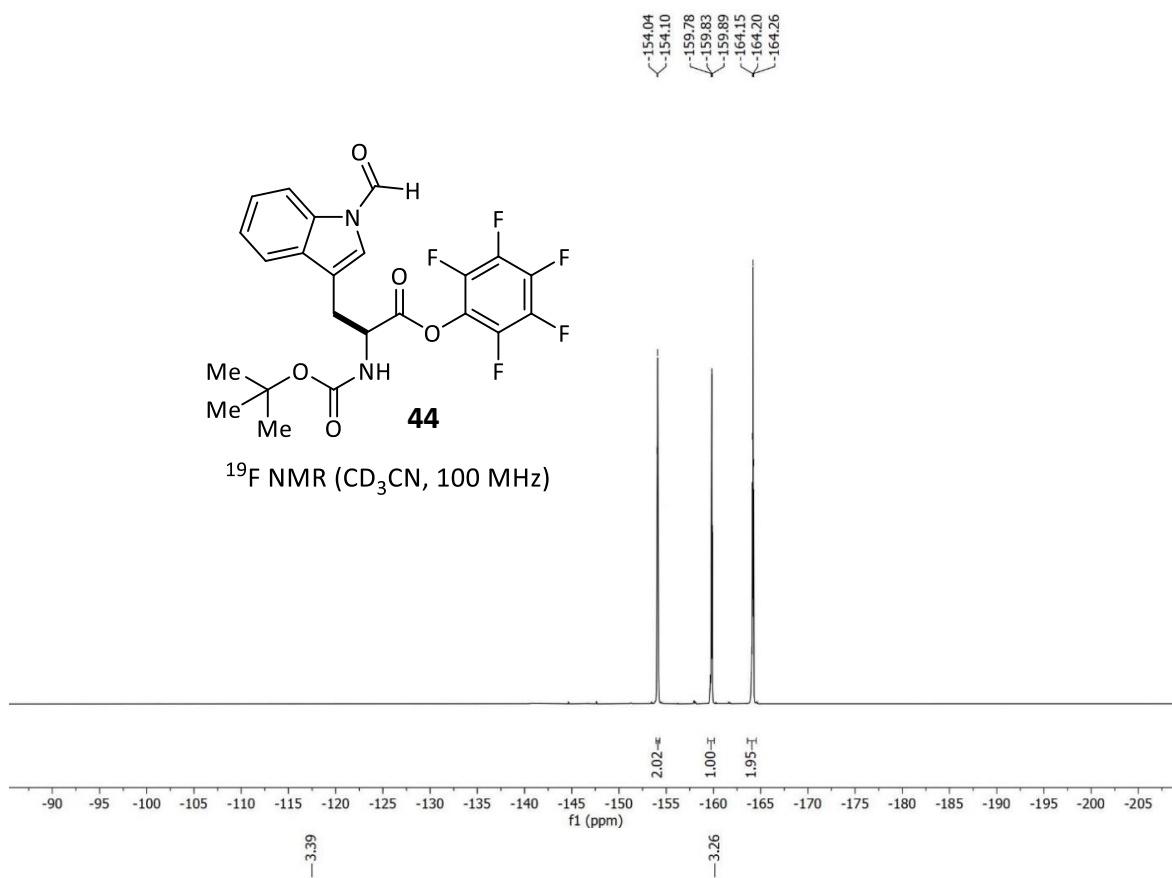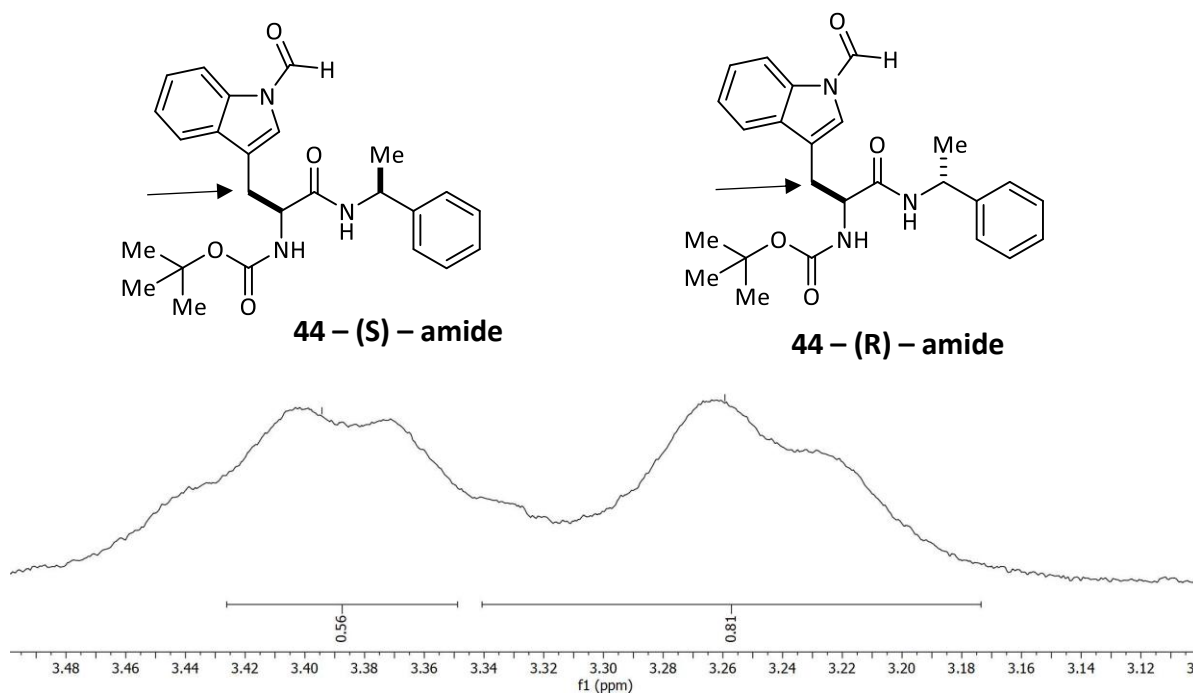

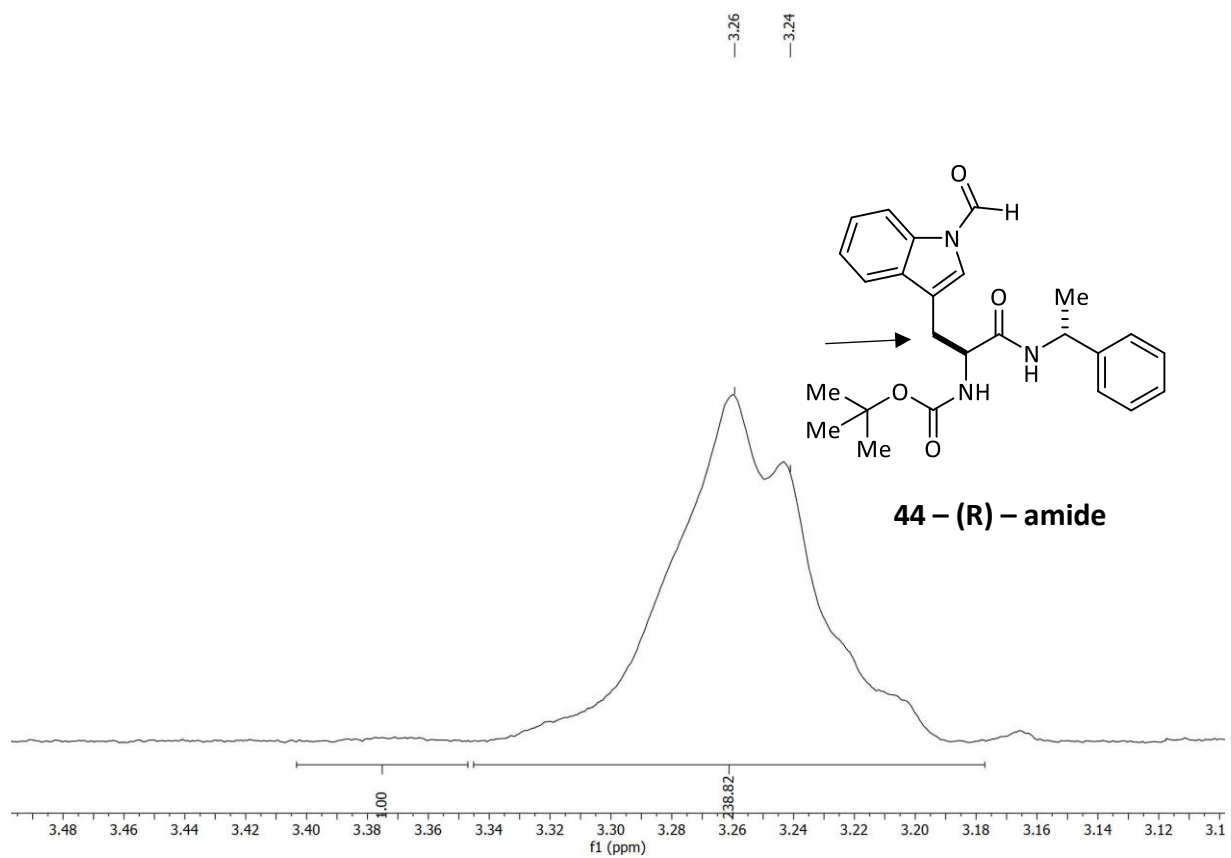

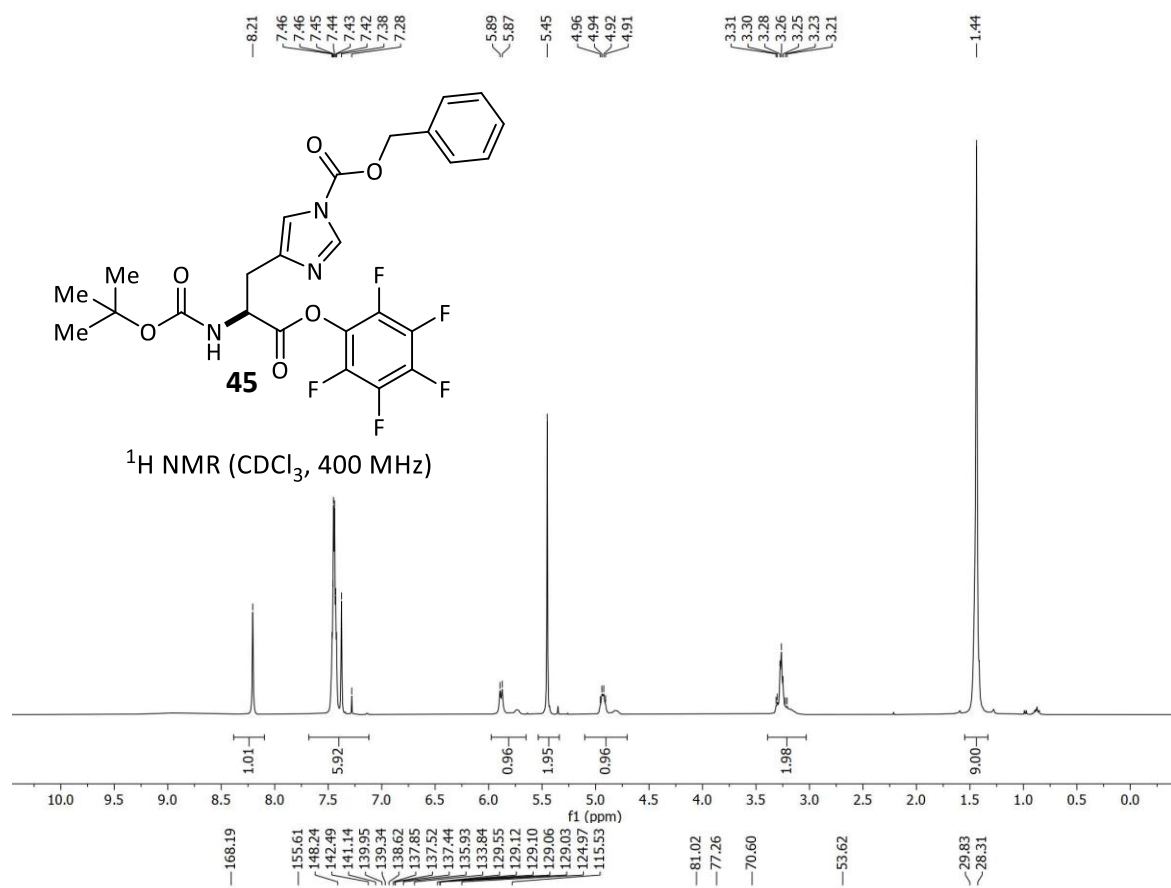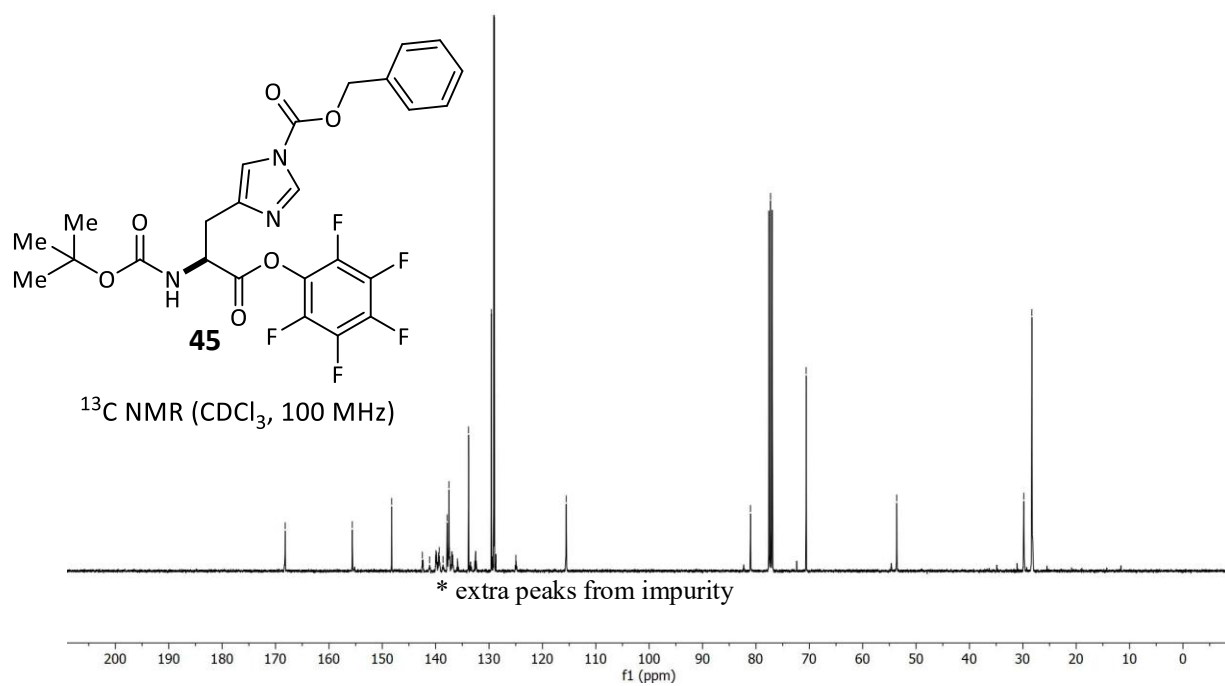

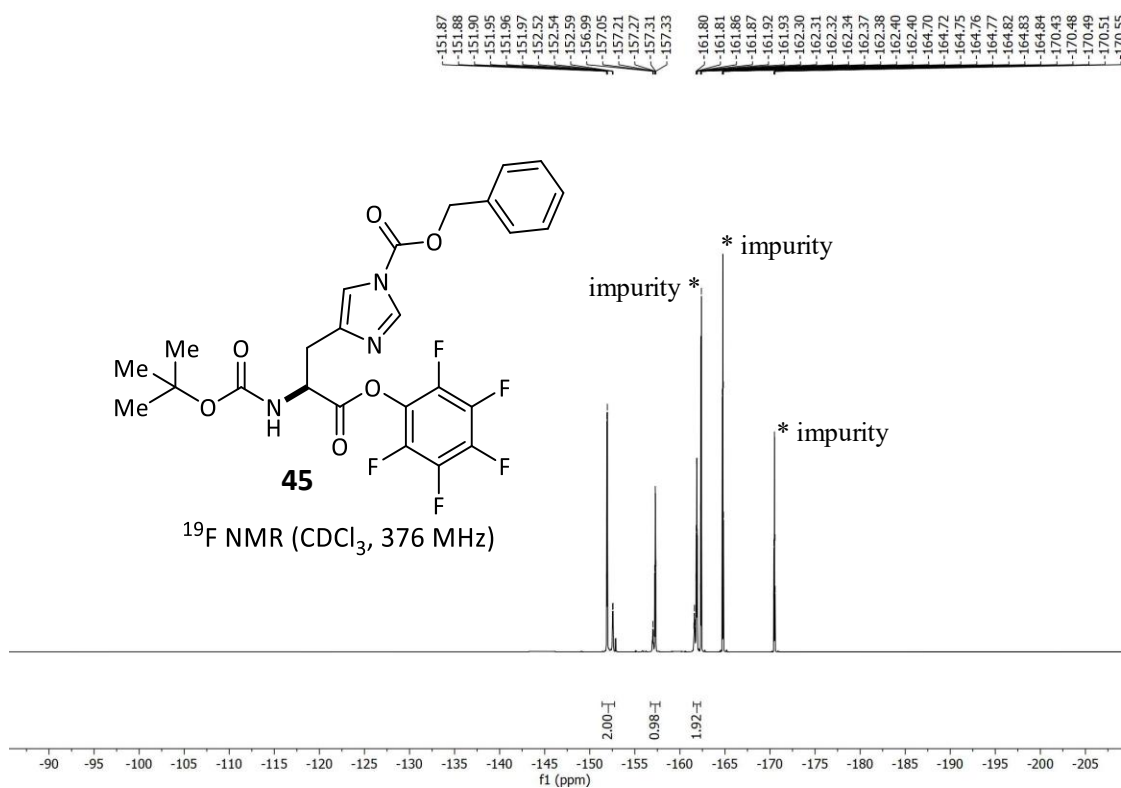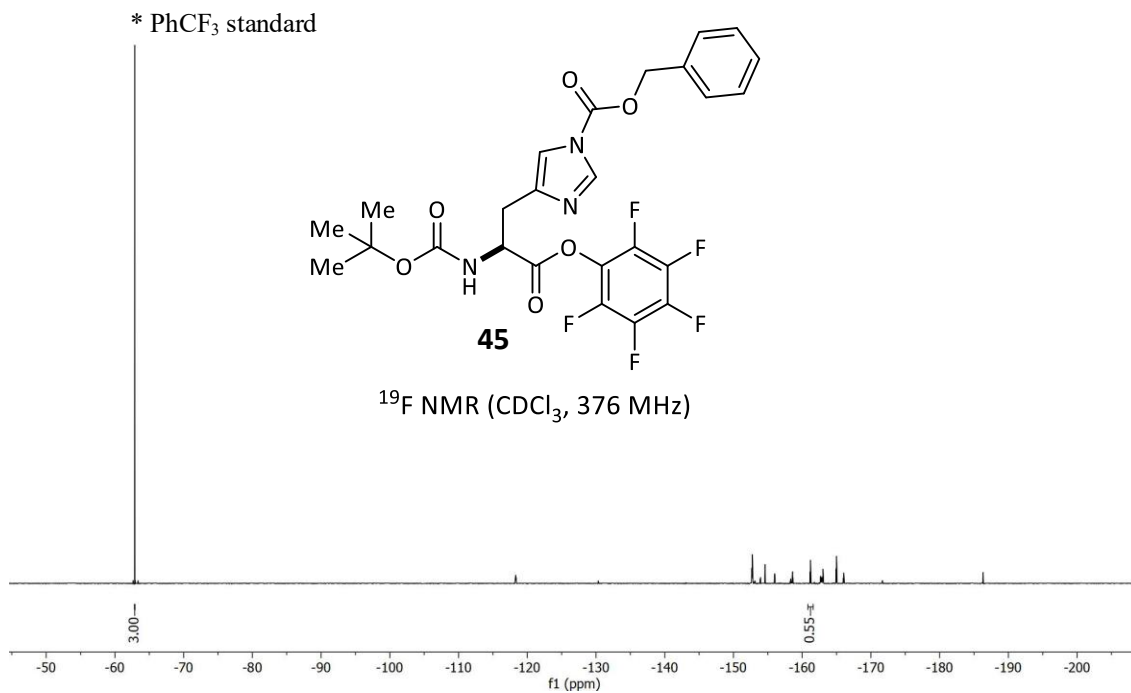

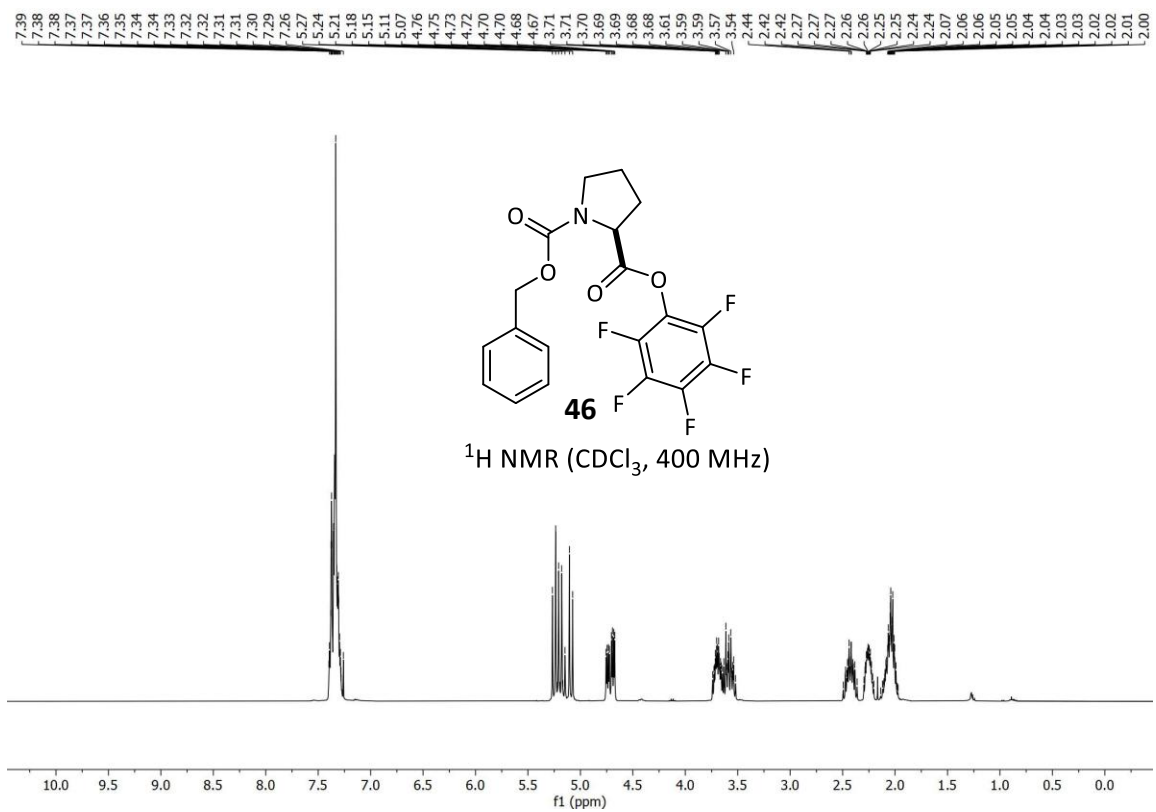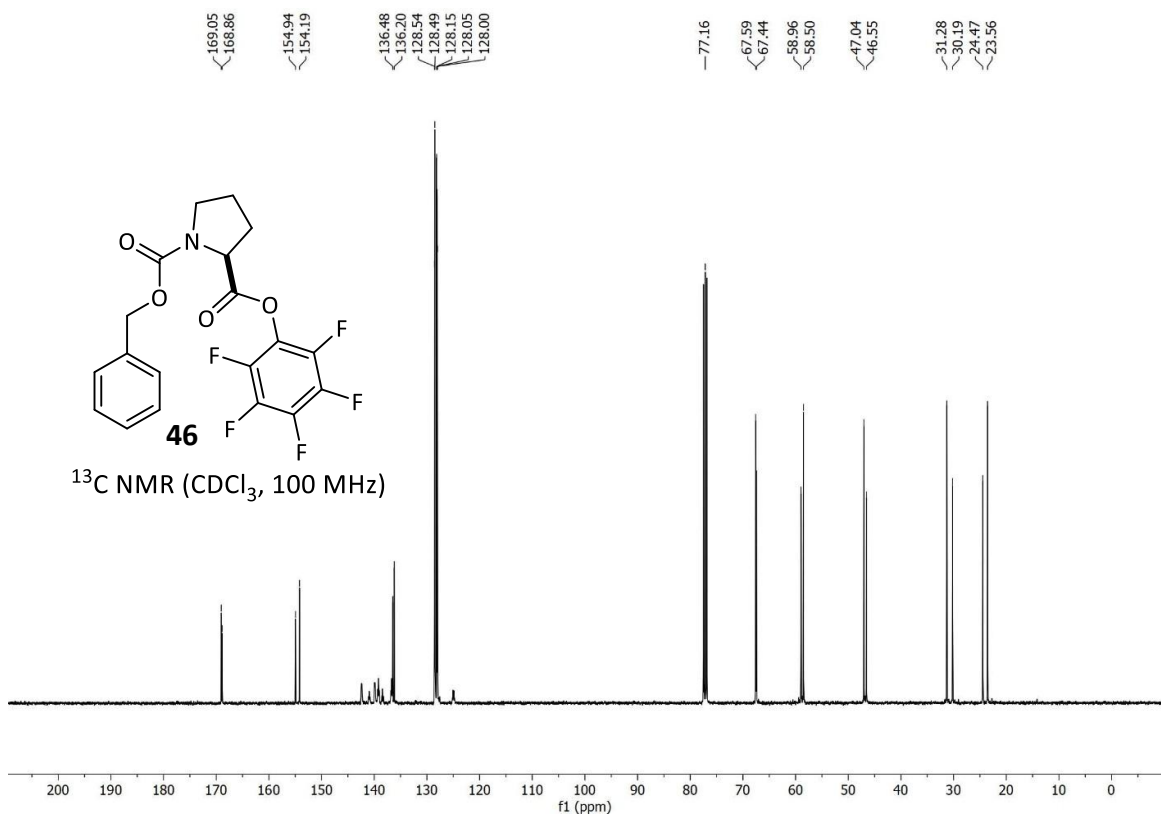

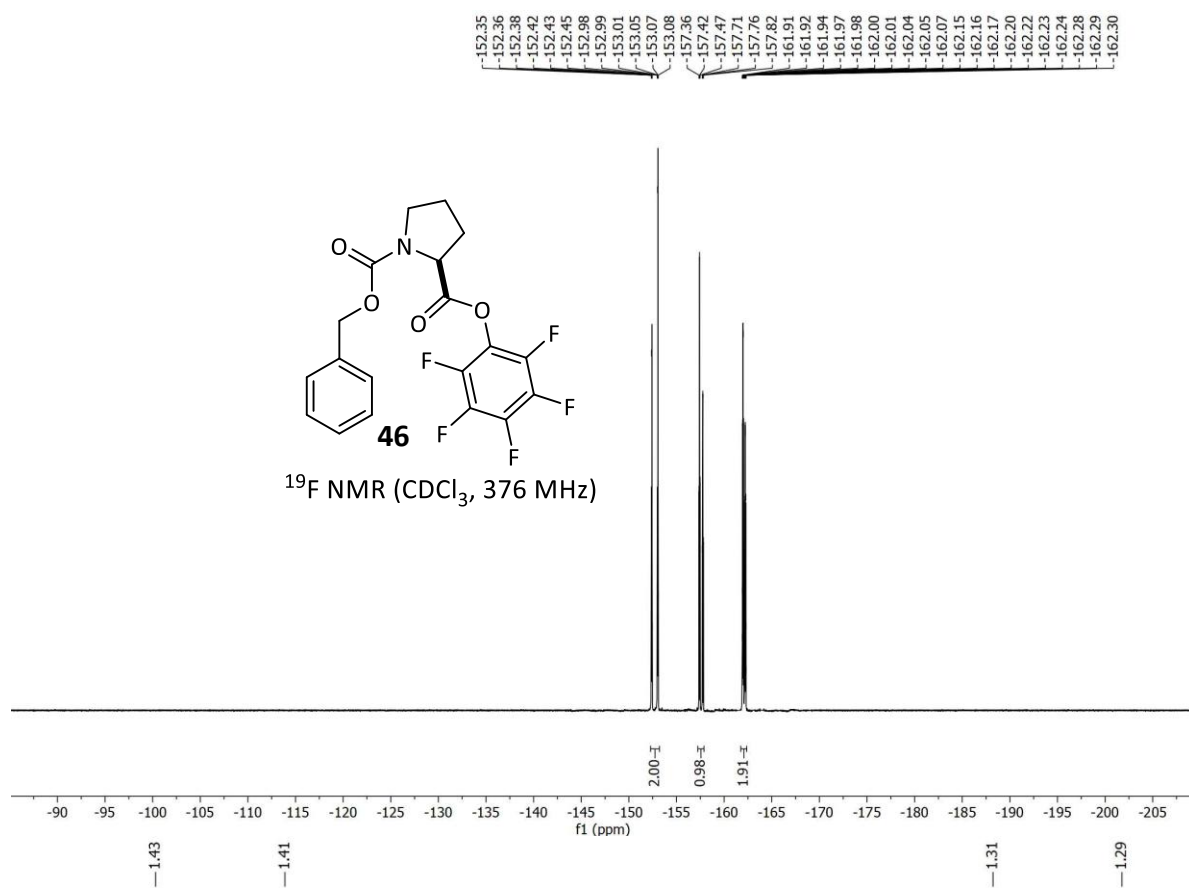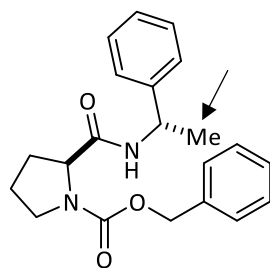

**46 – (R) – amide**

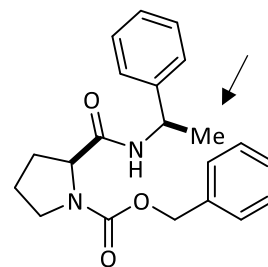

**46 – (S) – amide**

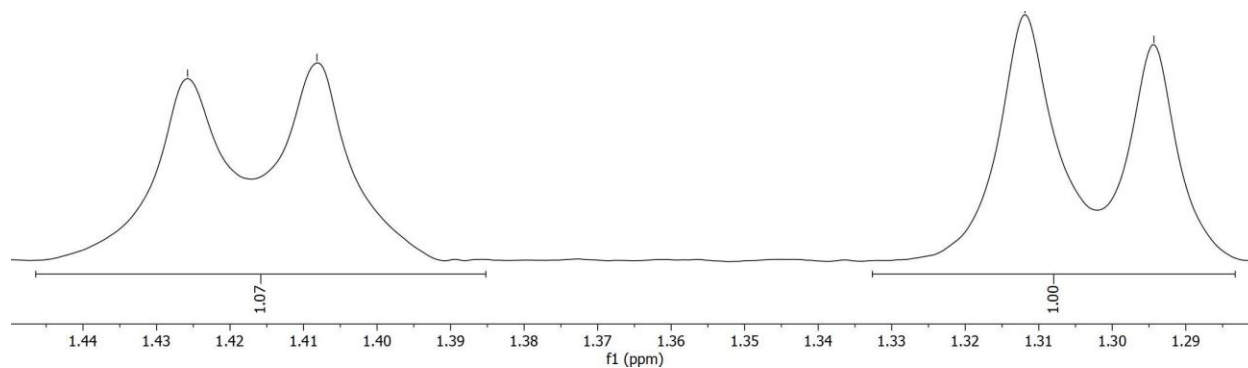



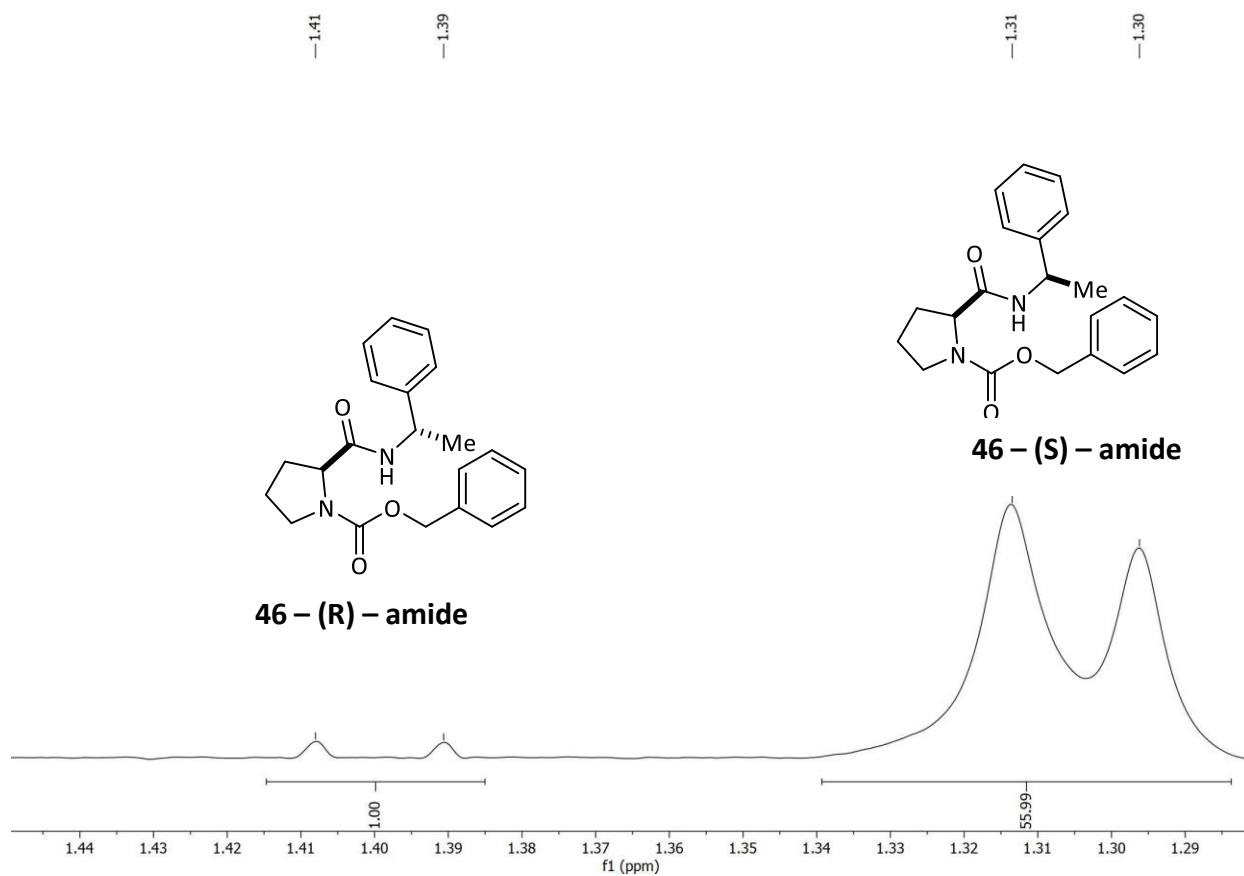

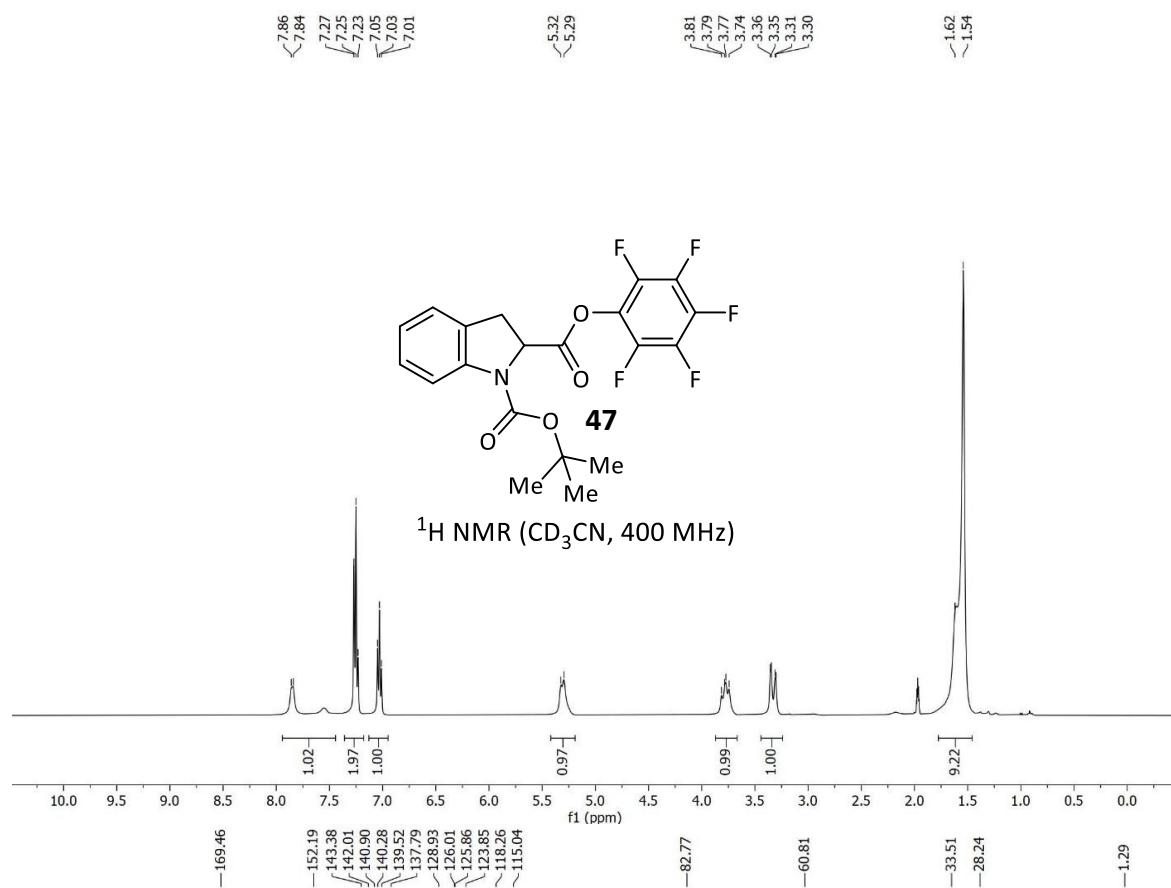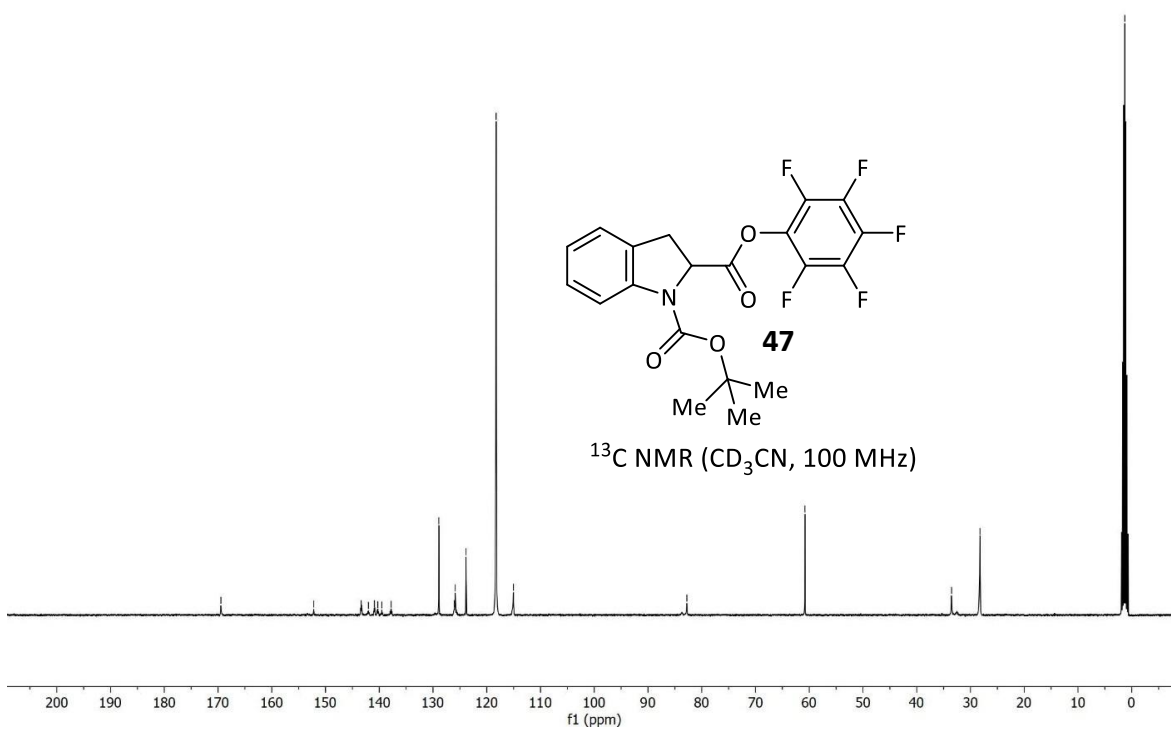

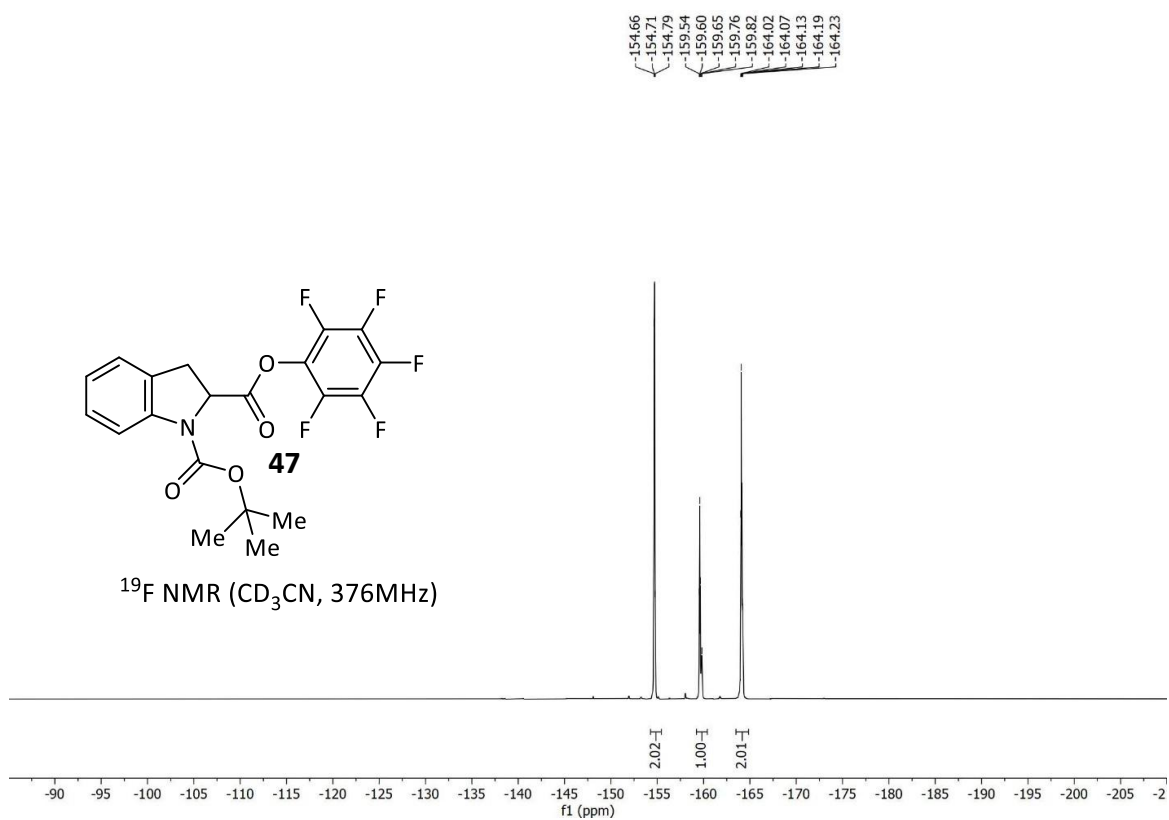

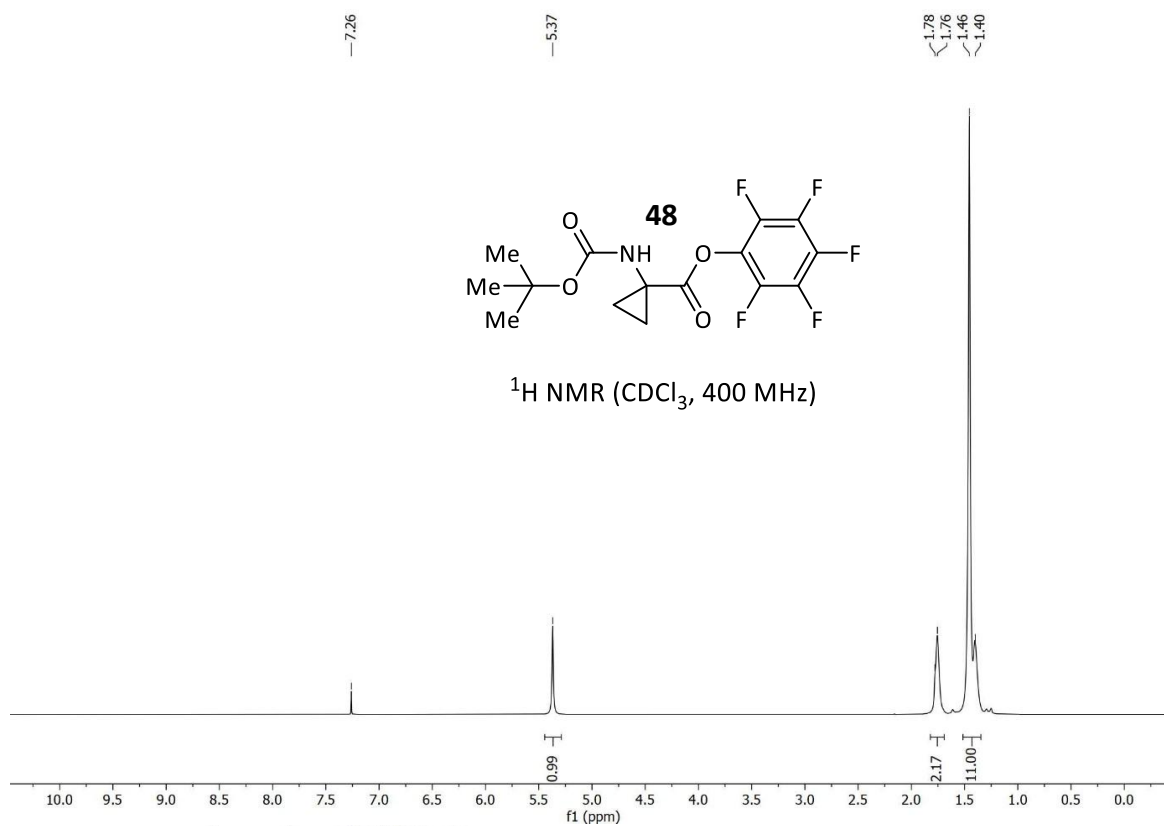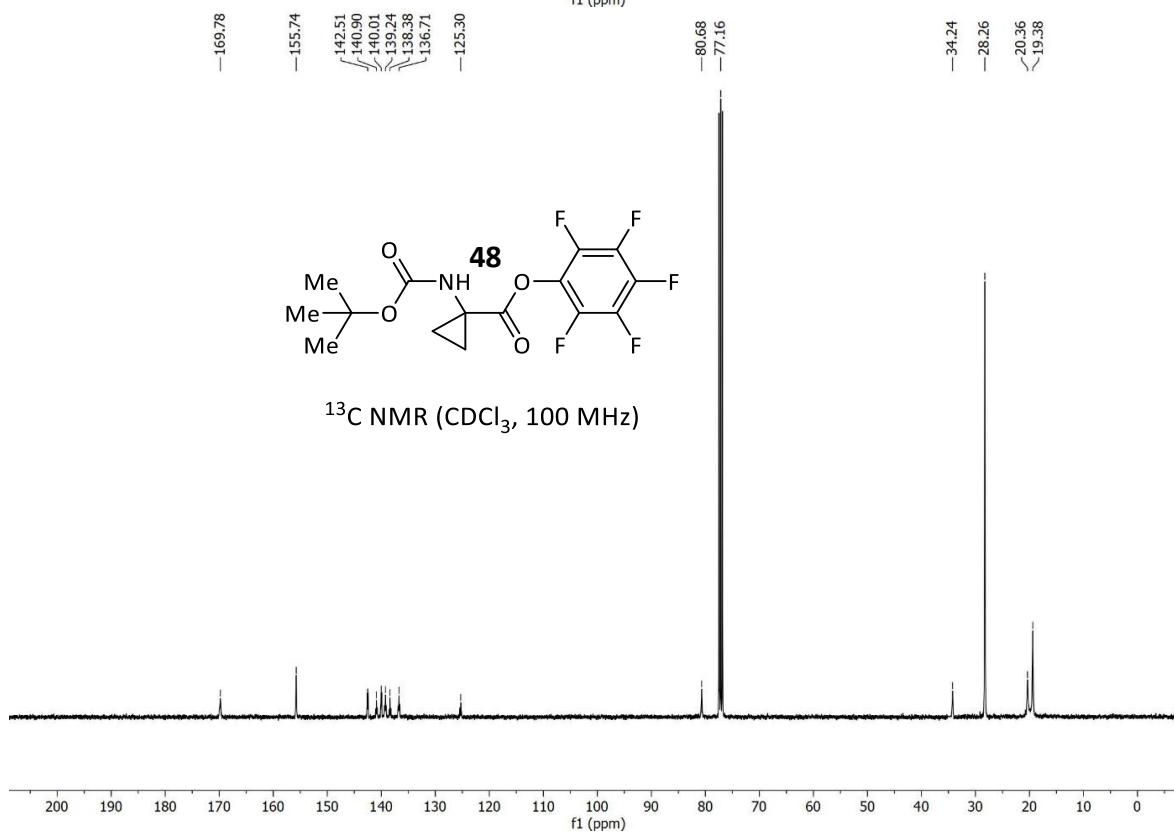

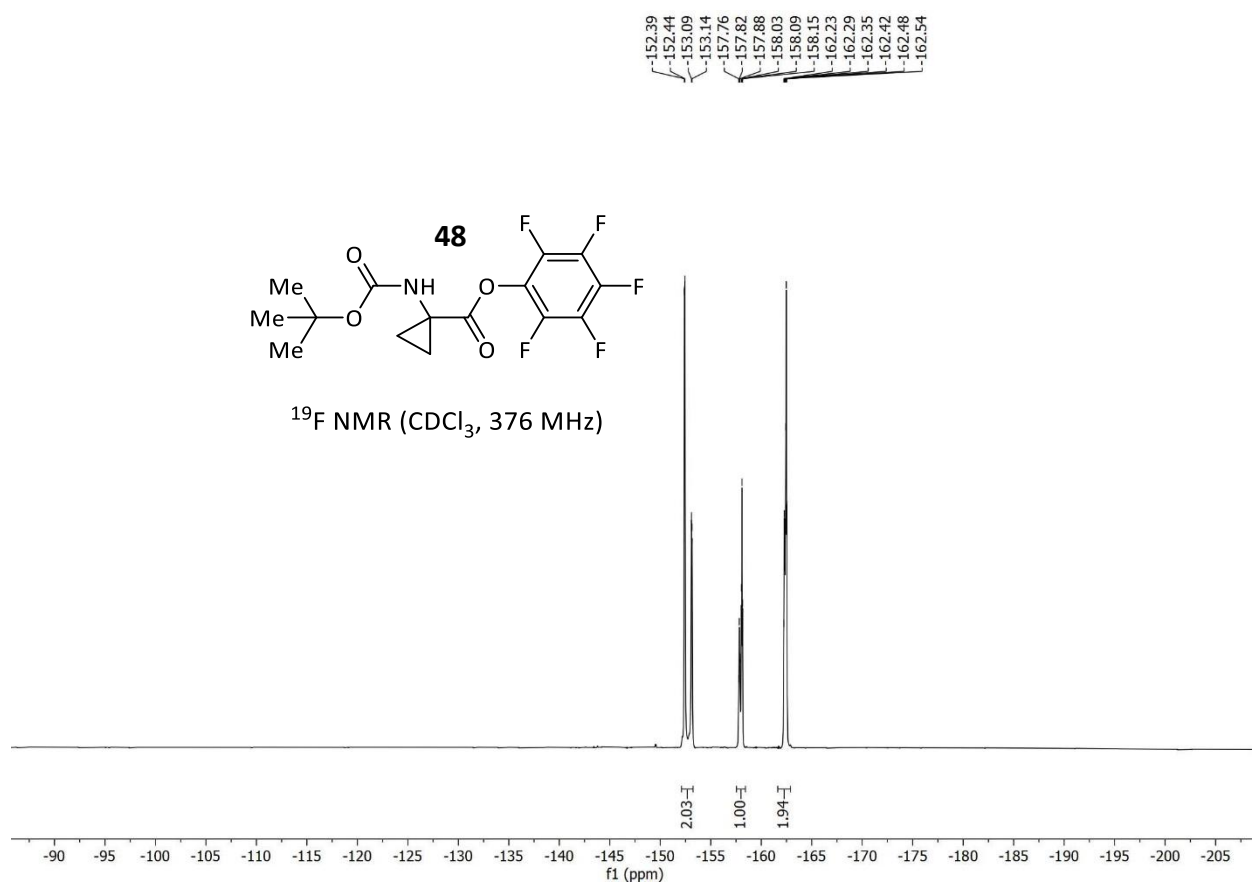

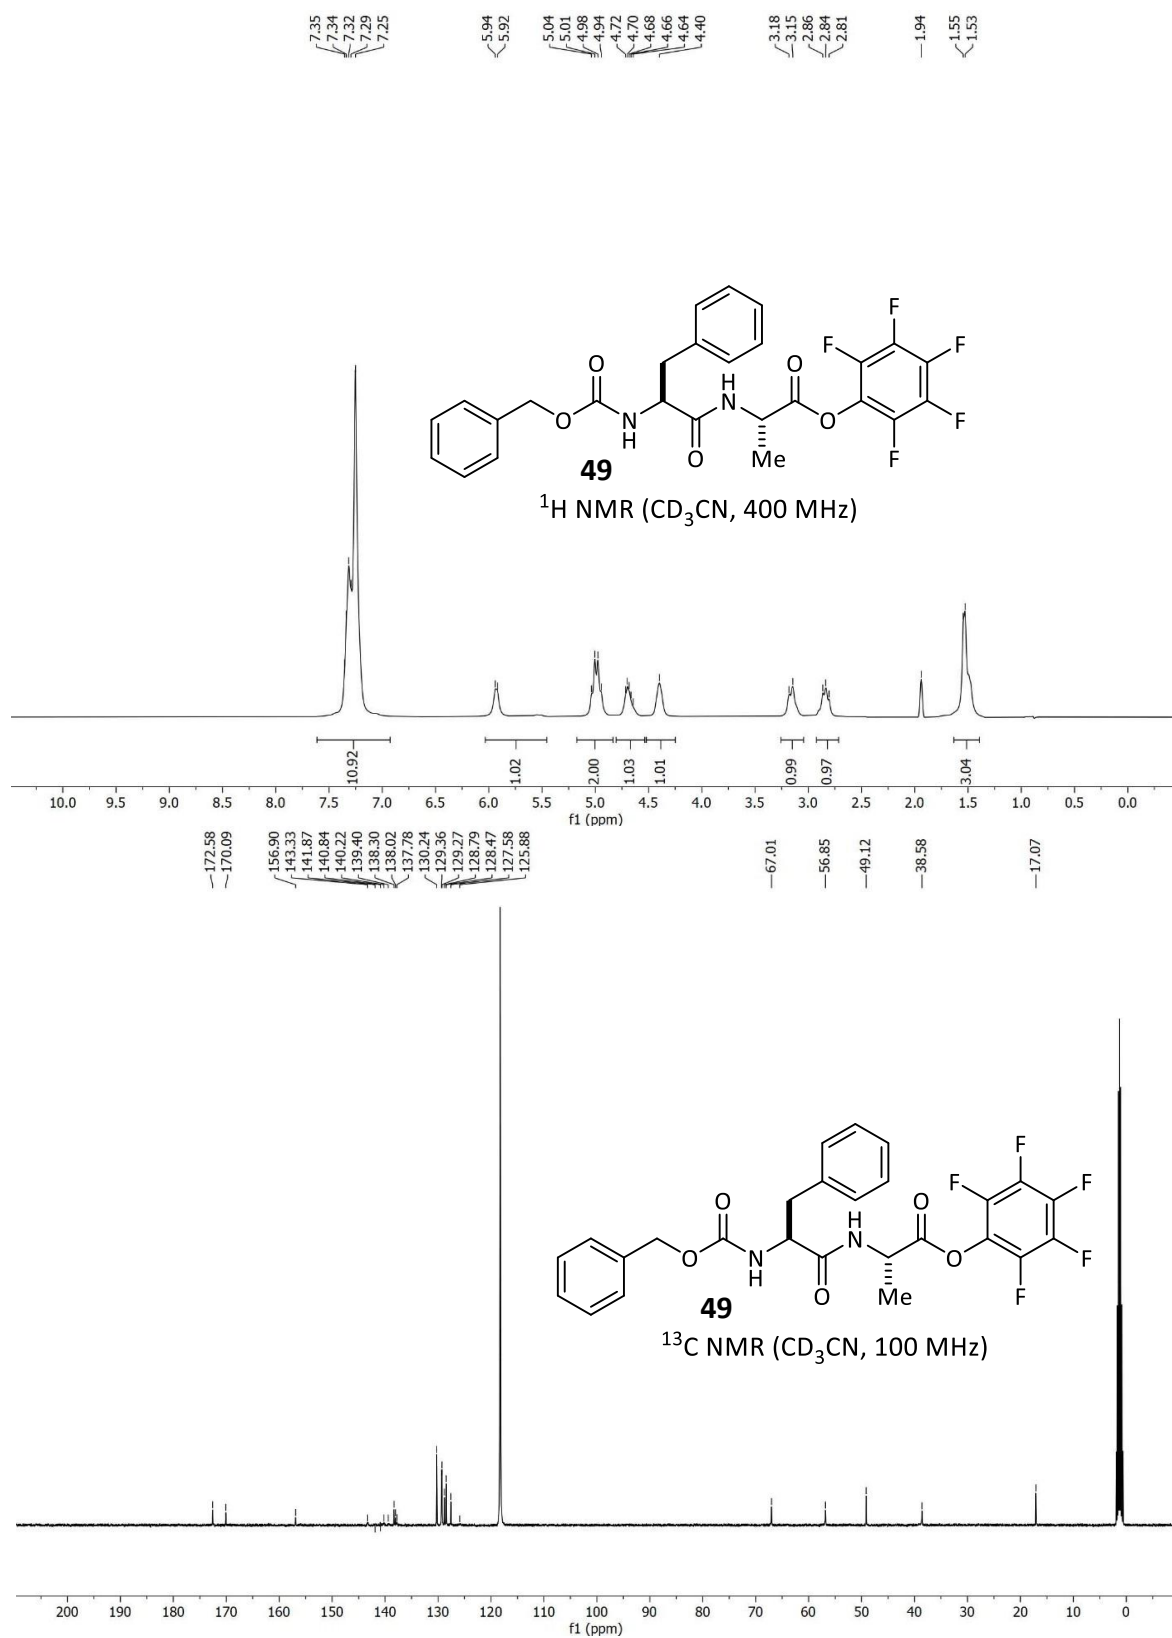

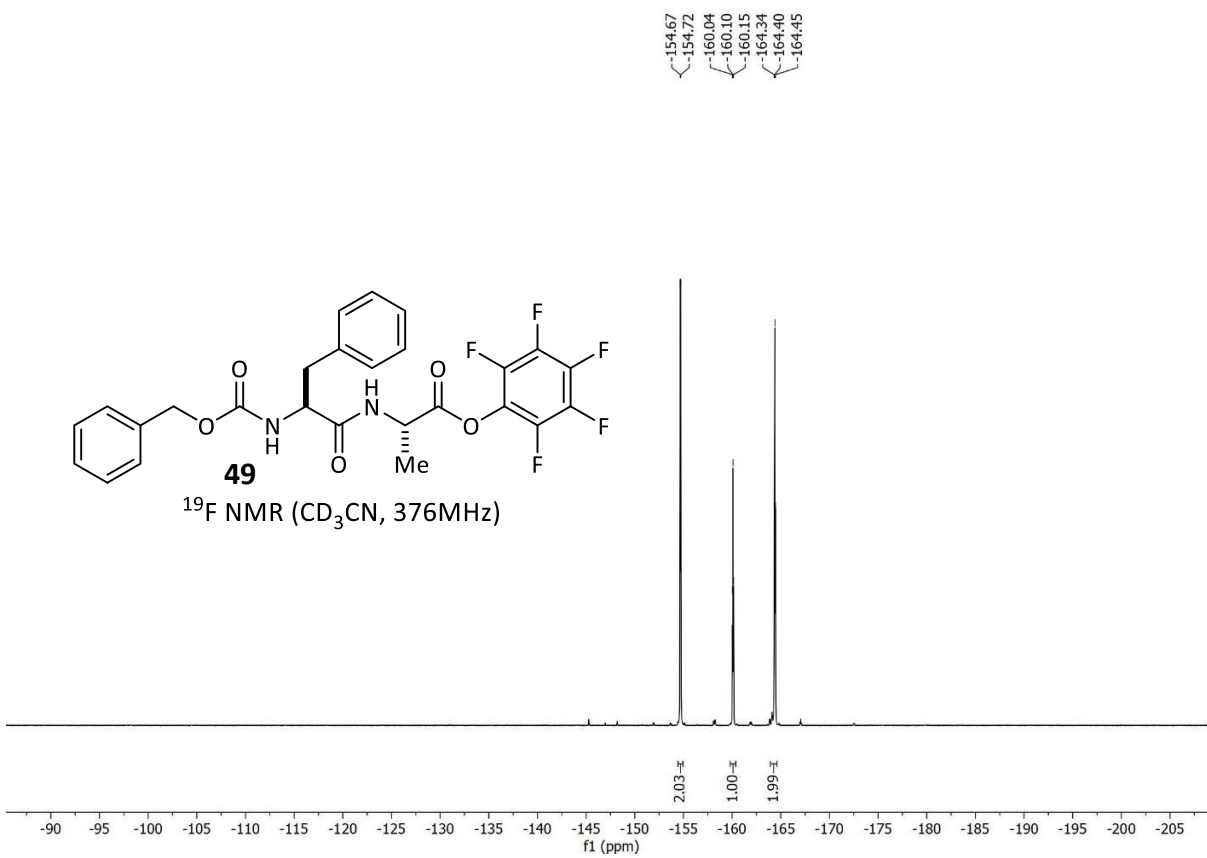

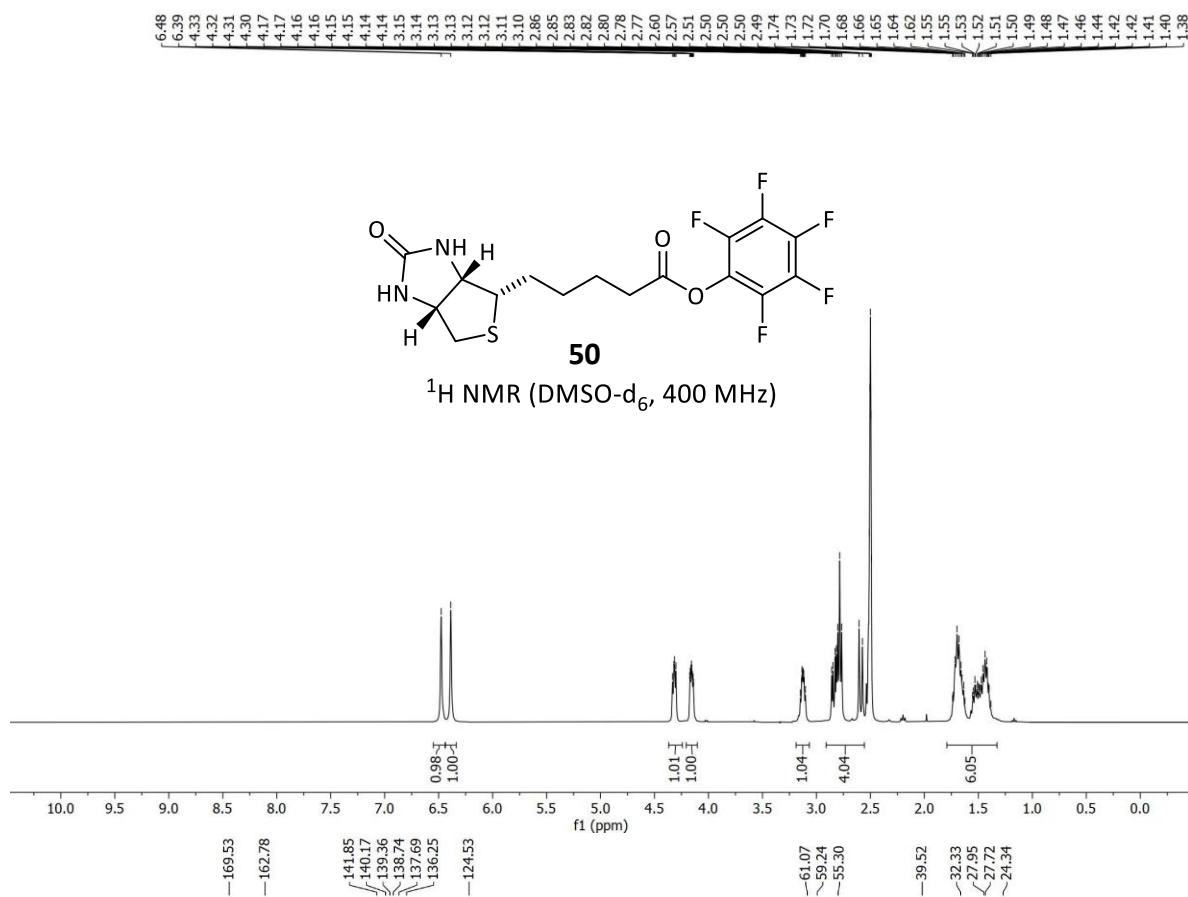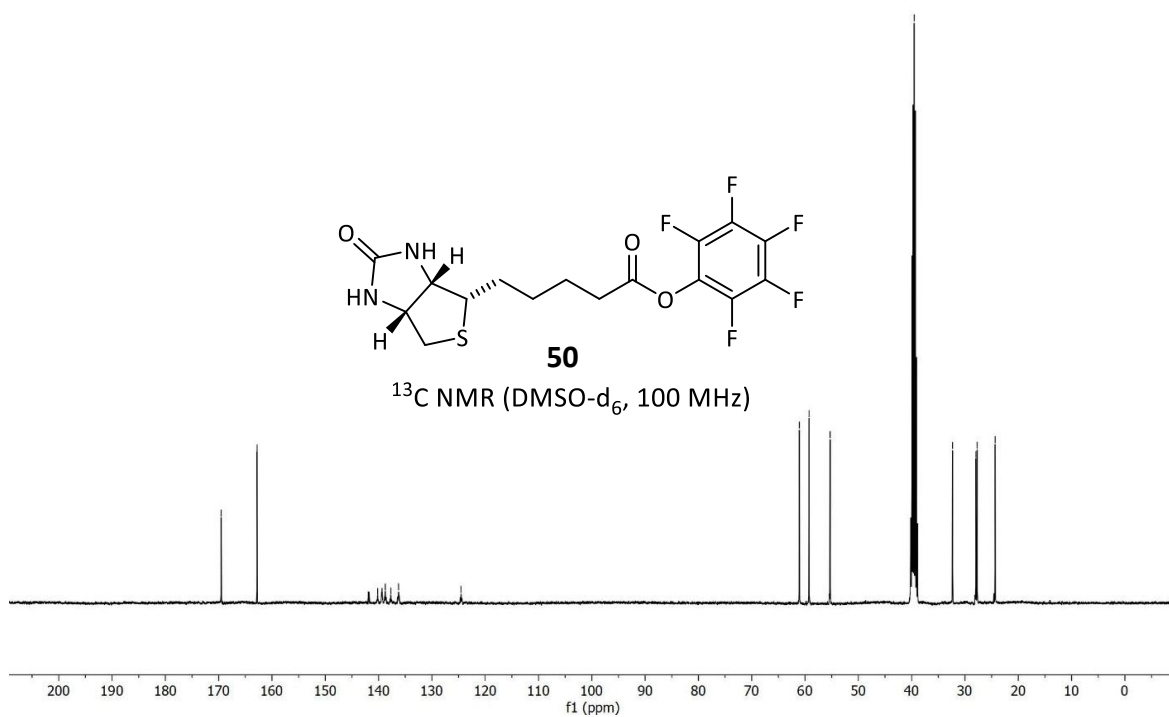



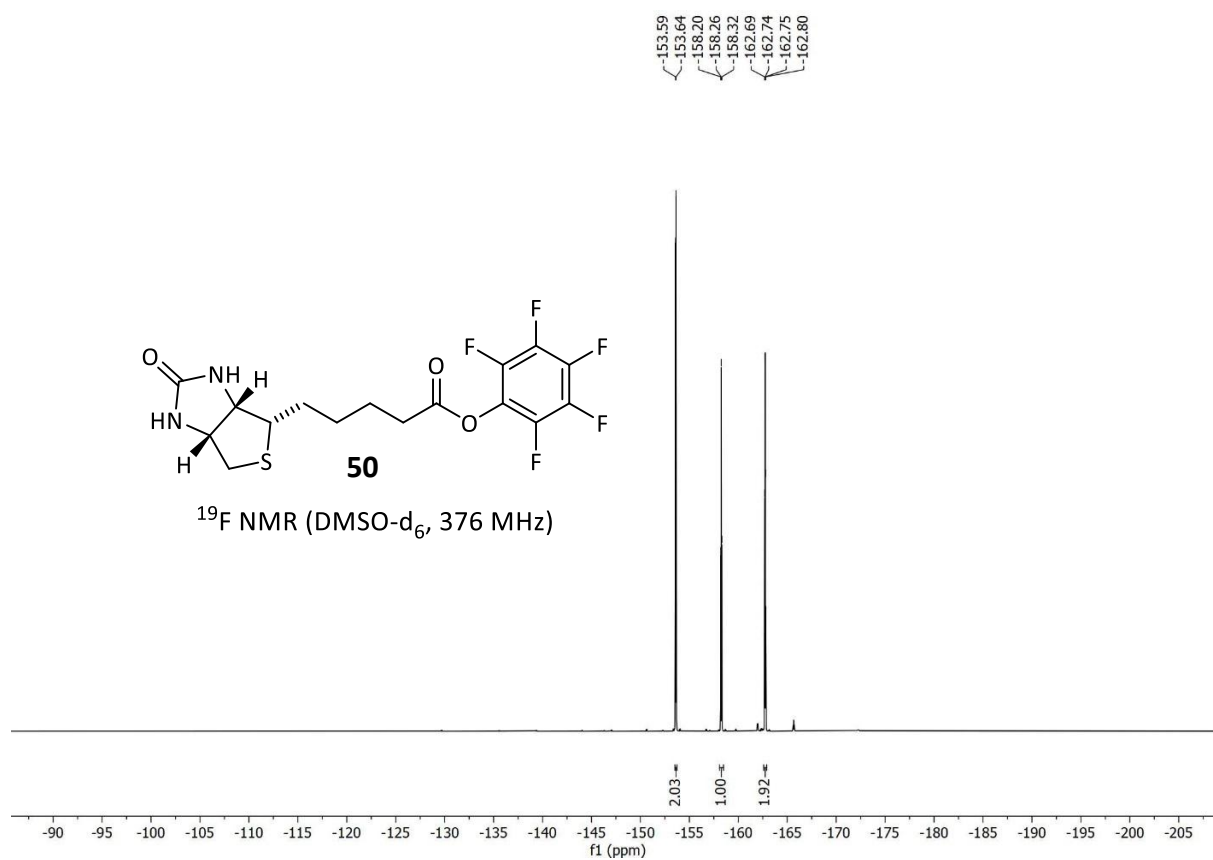

### XIII. NMR Spectra for Z-Phe Derivatives

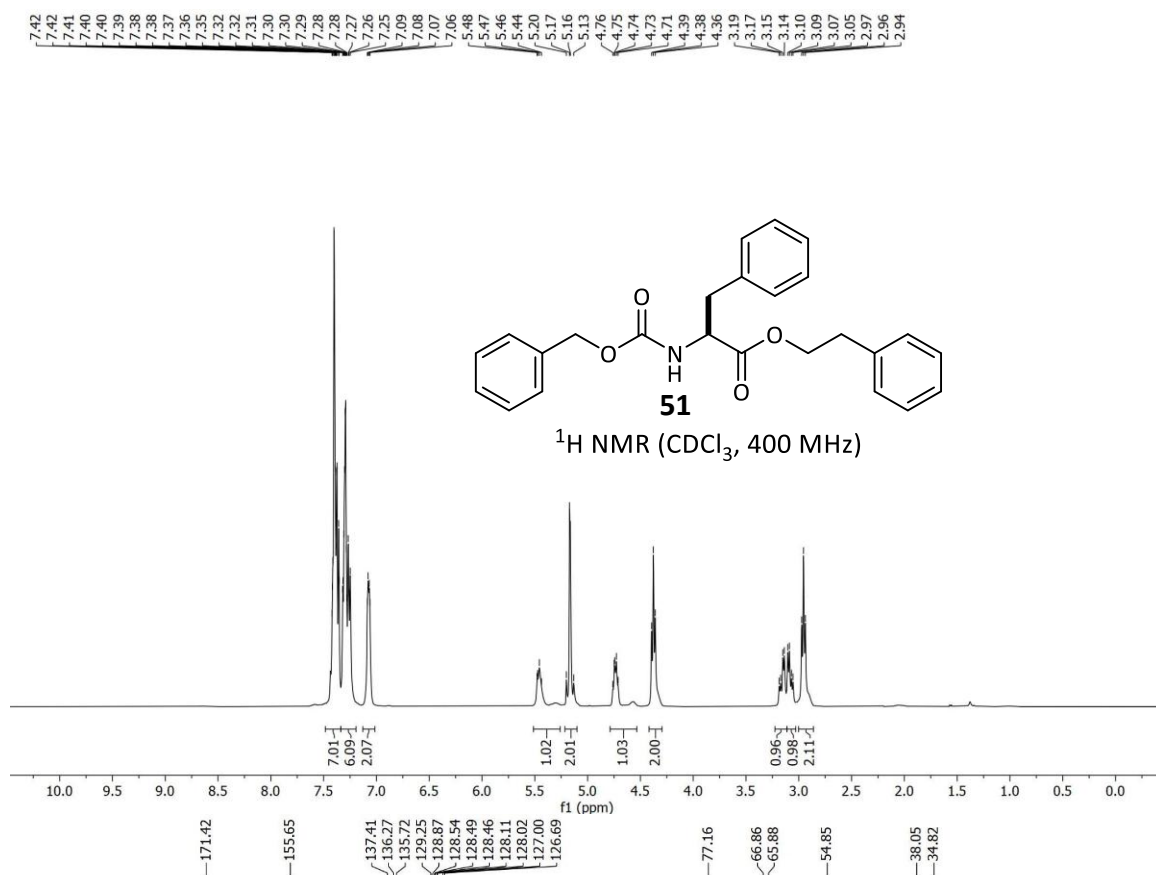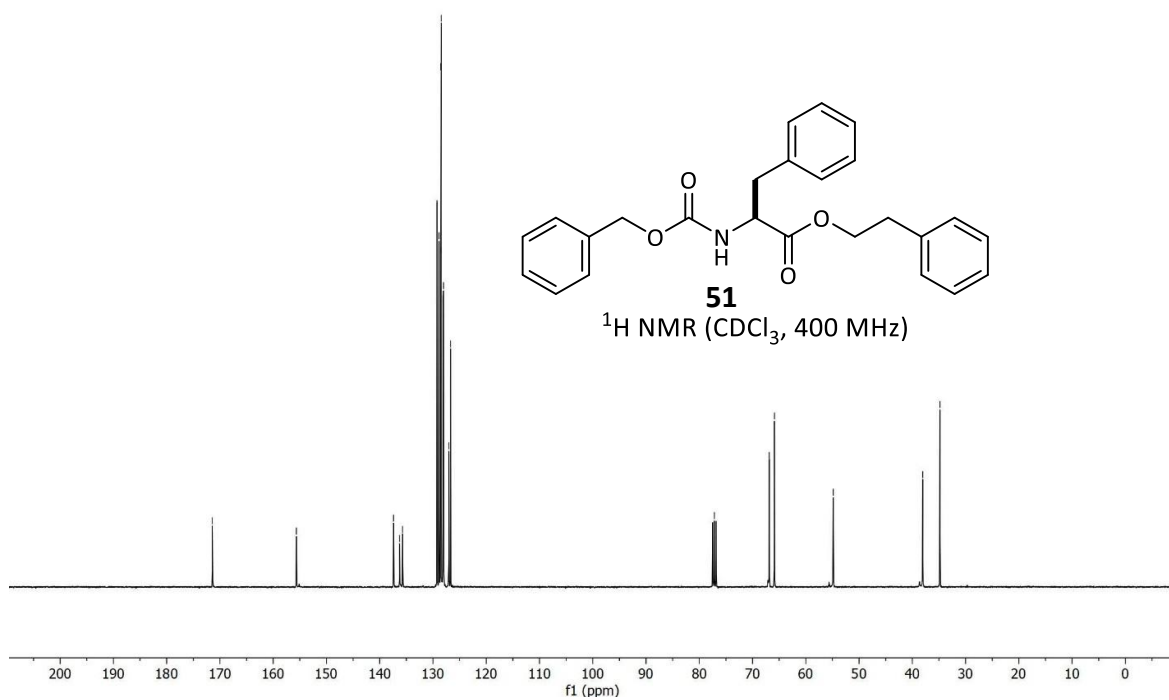

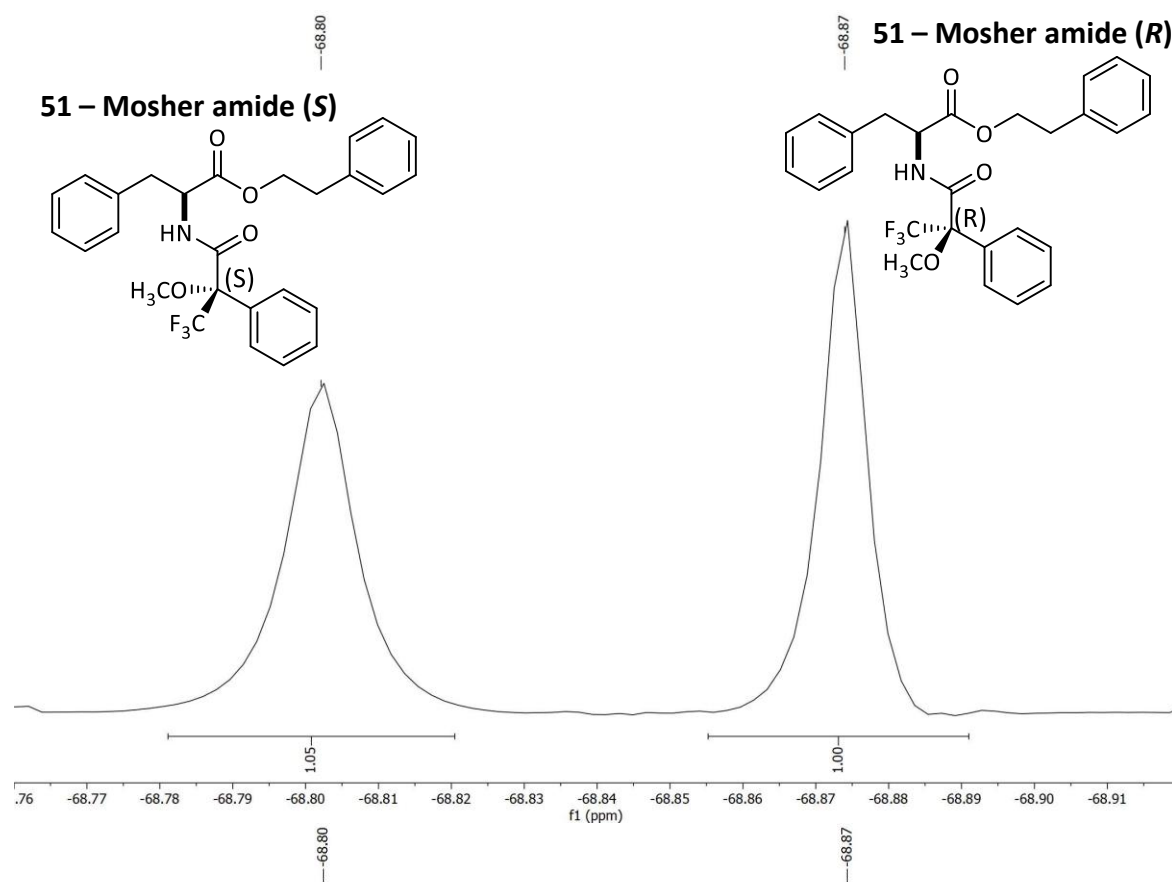

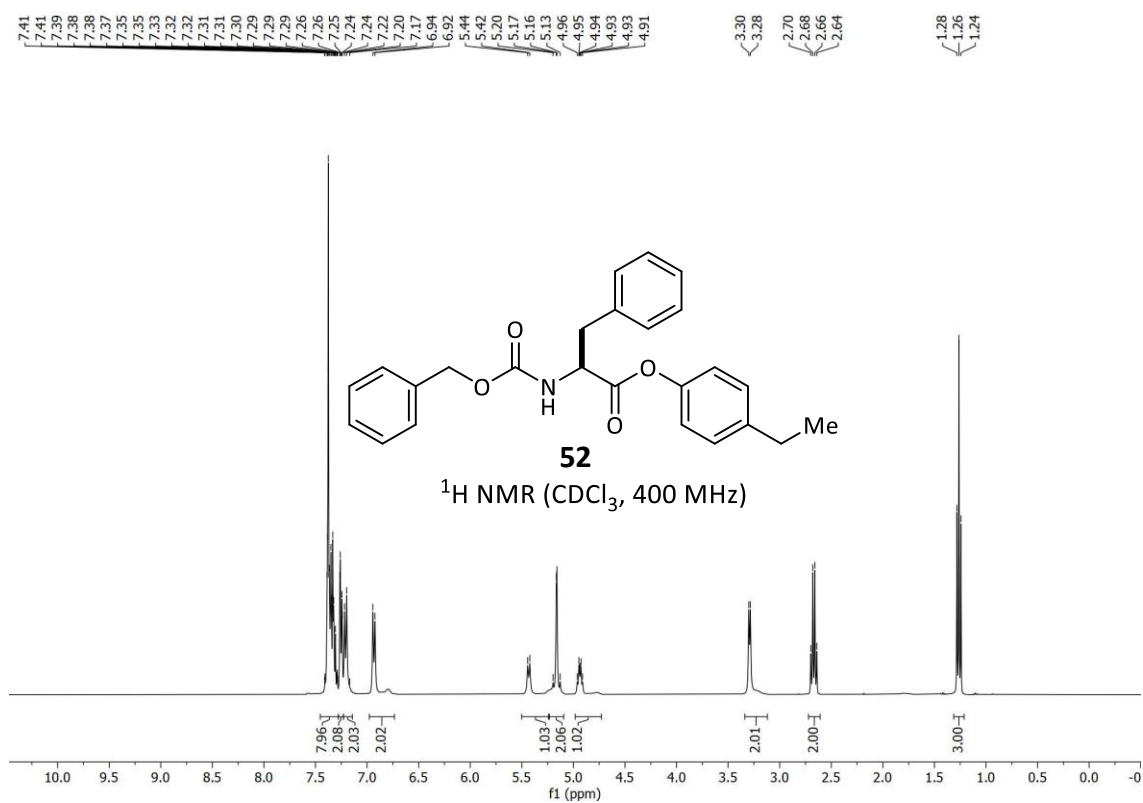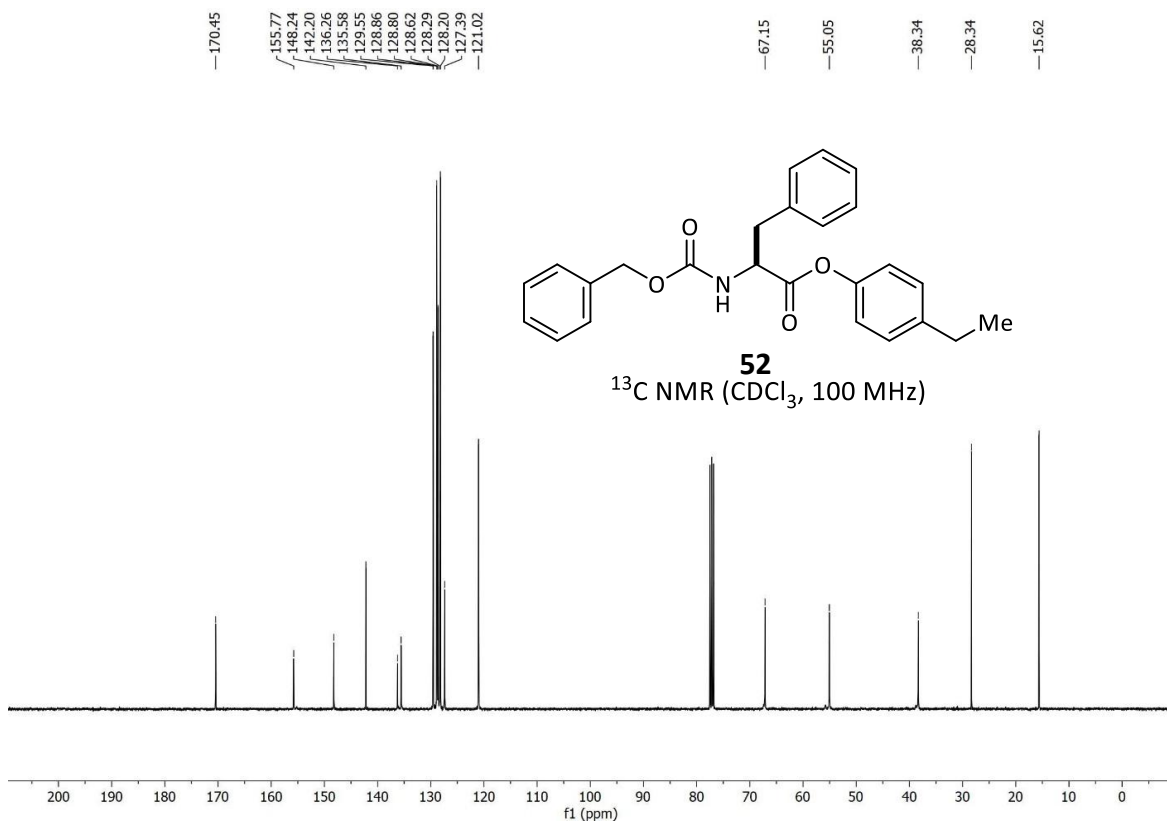

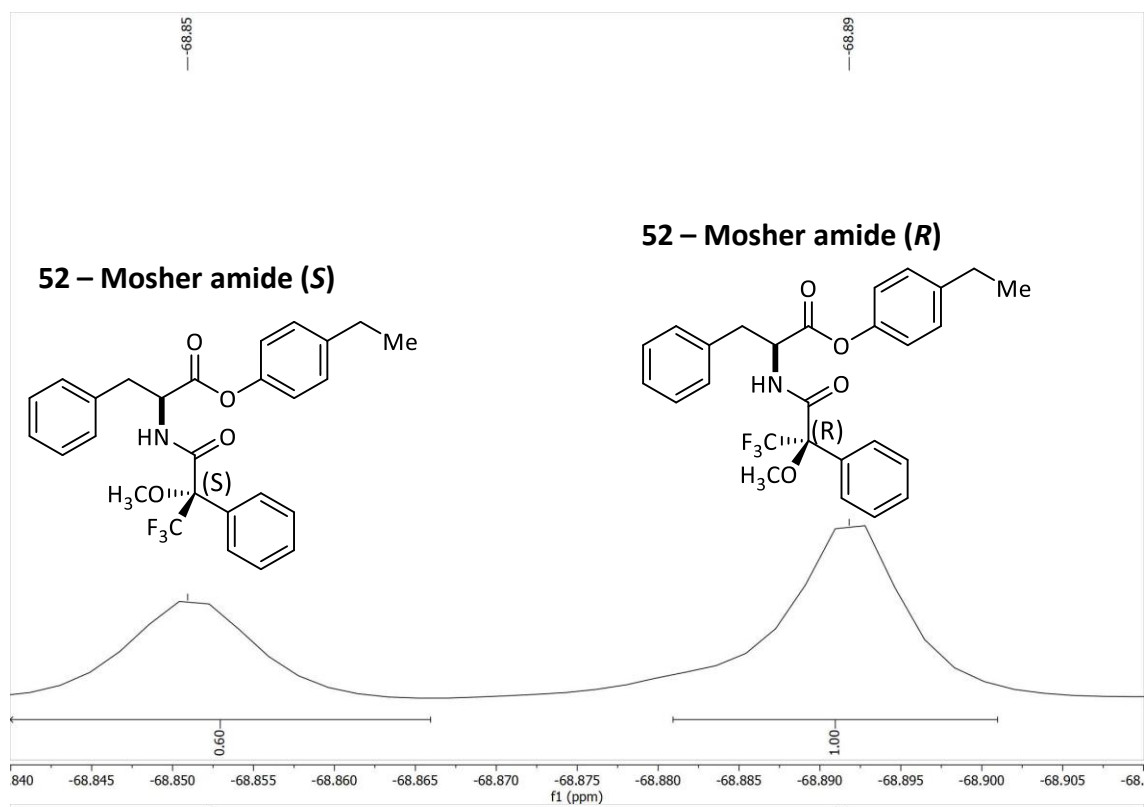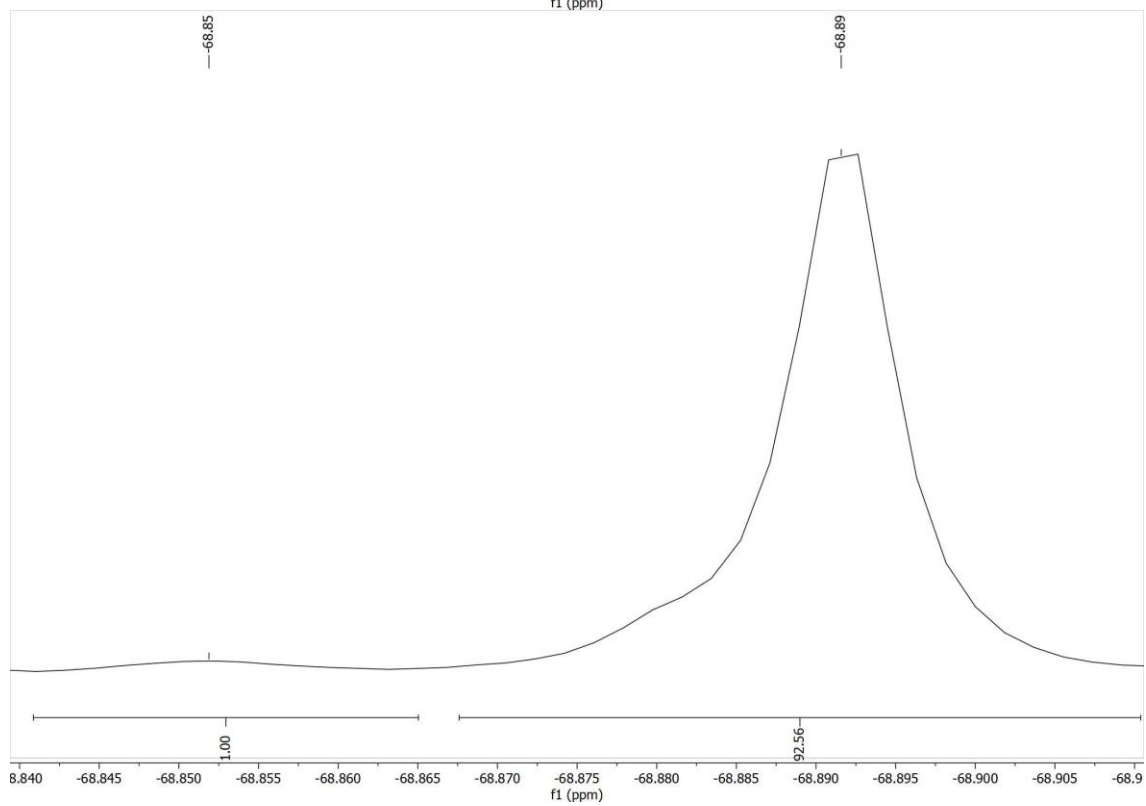

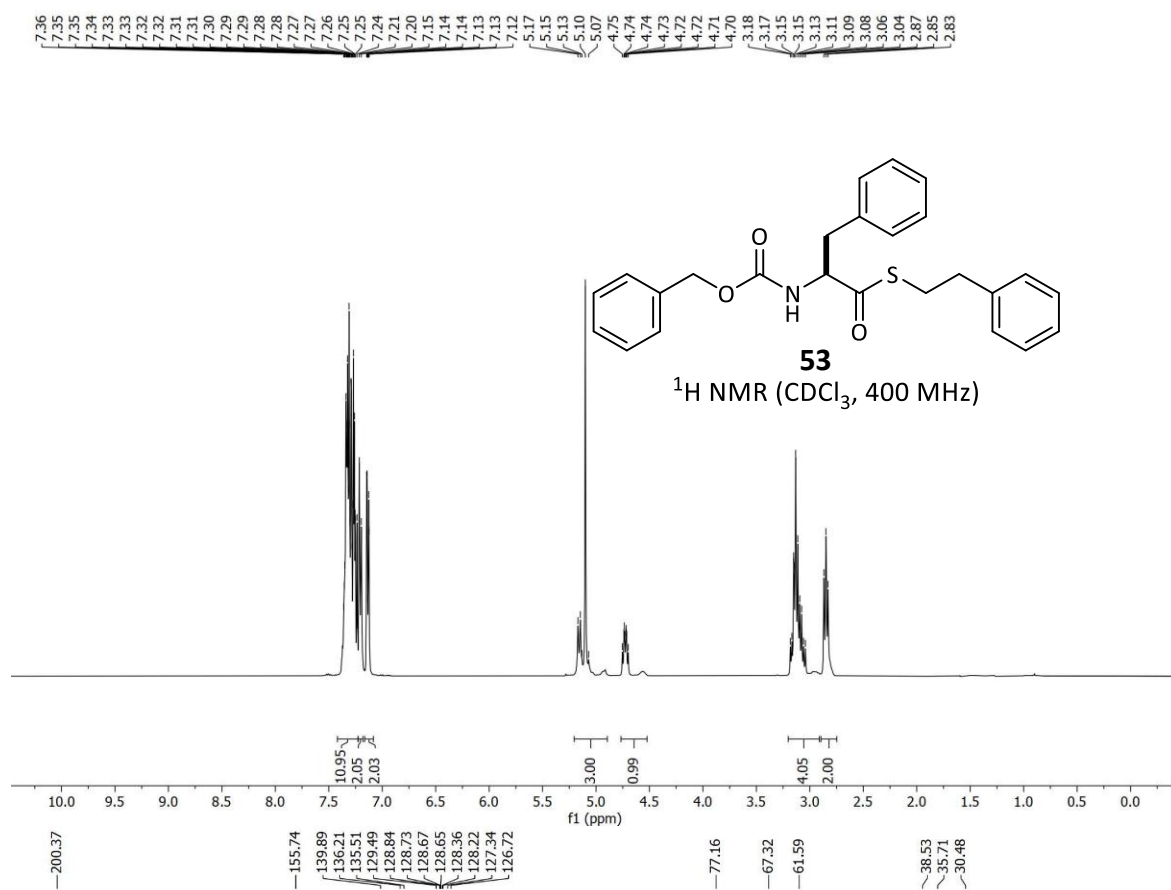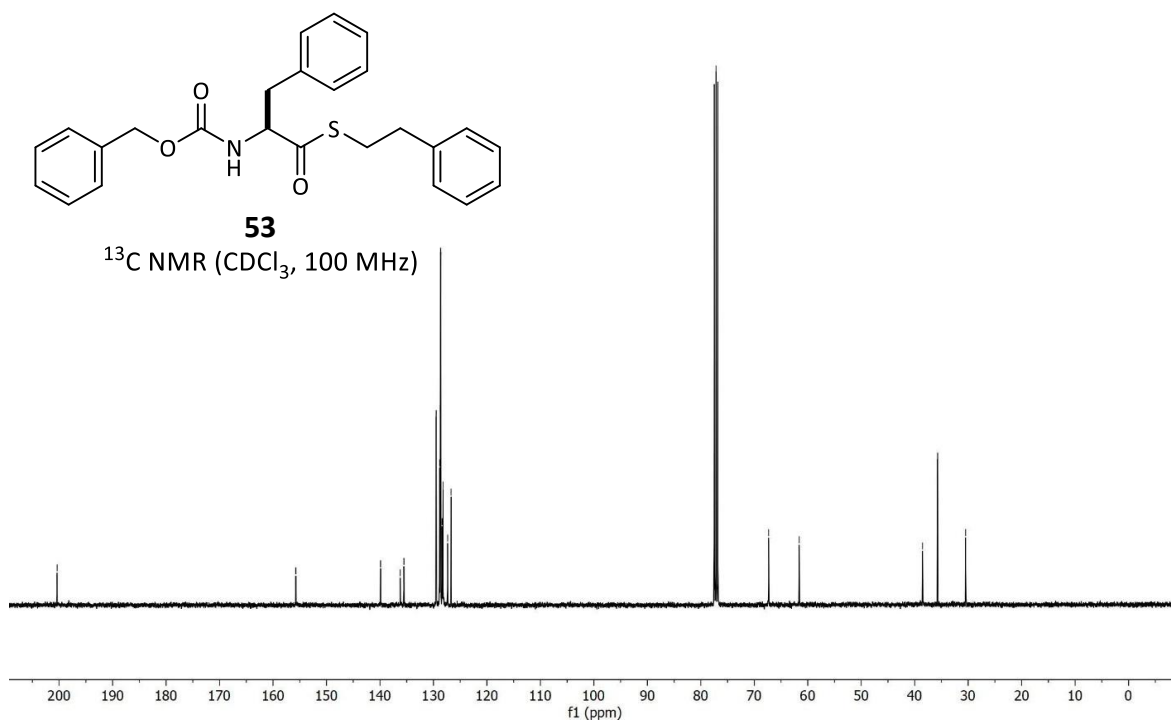

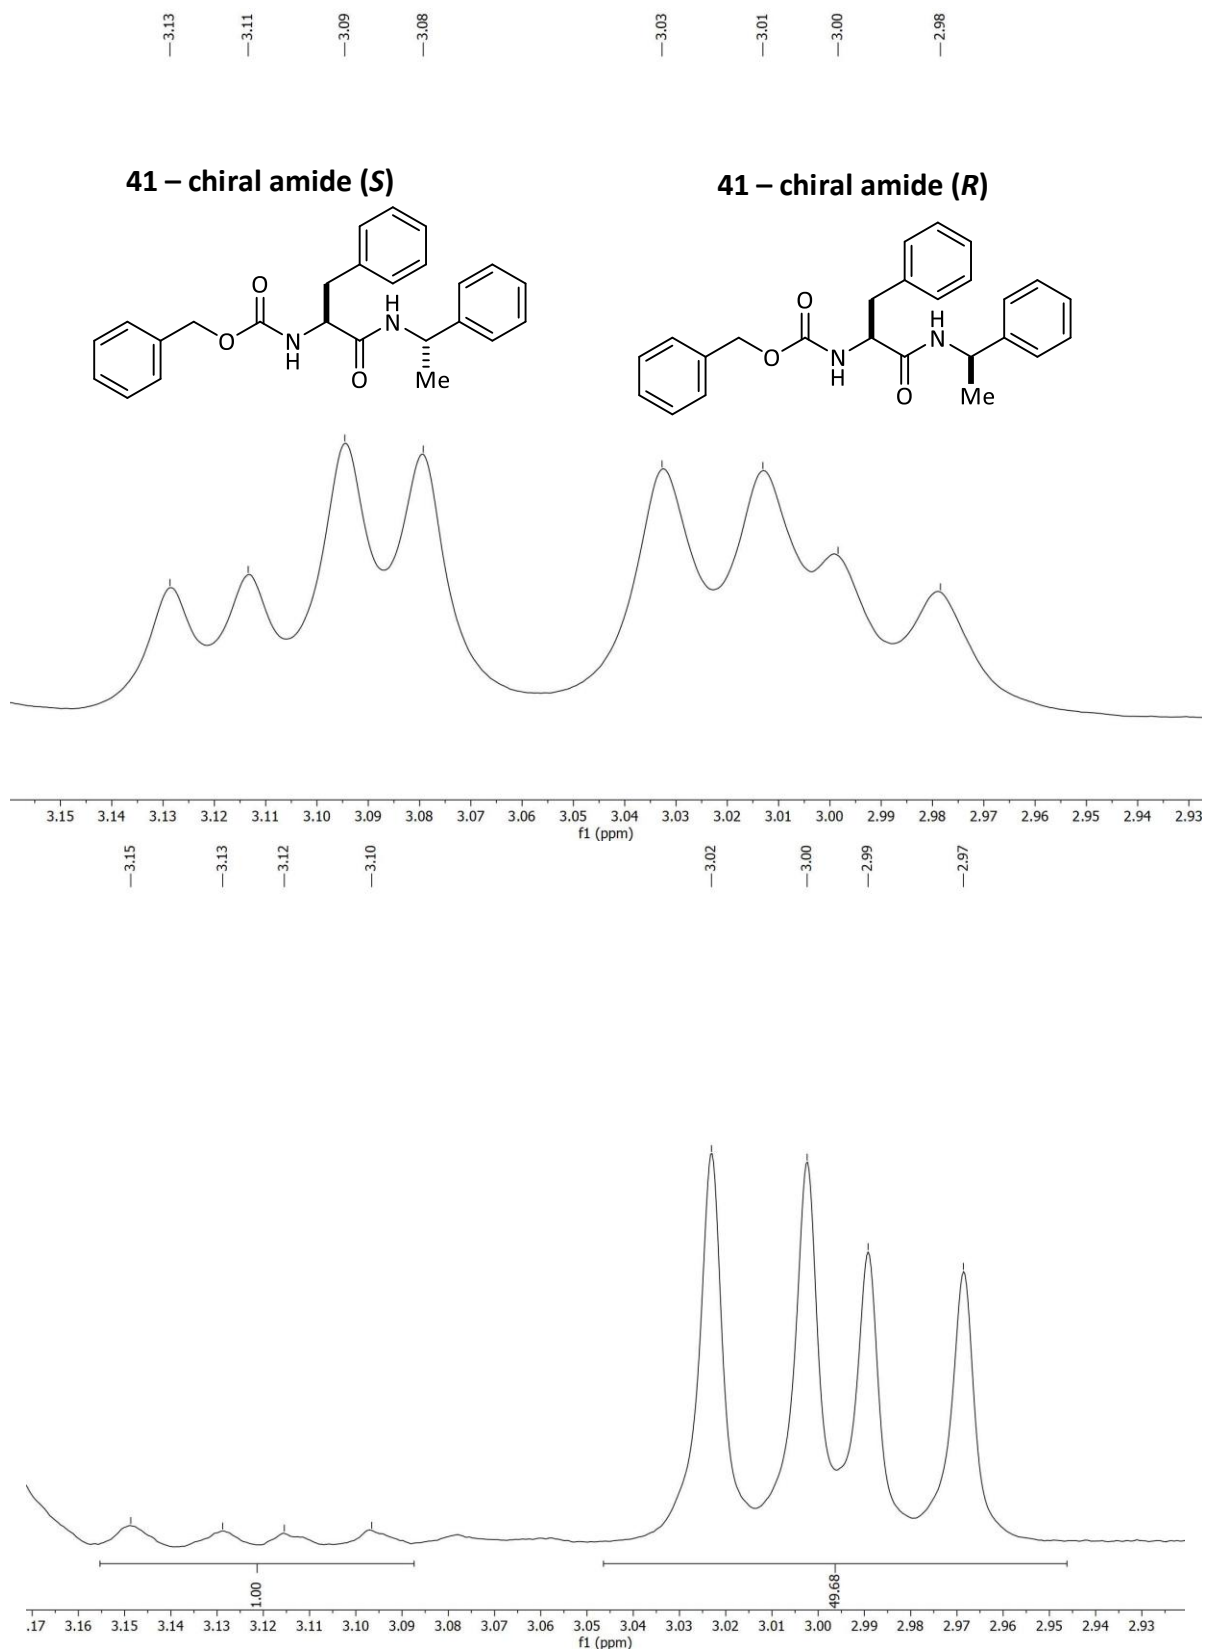

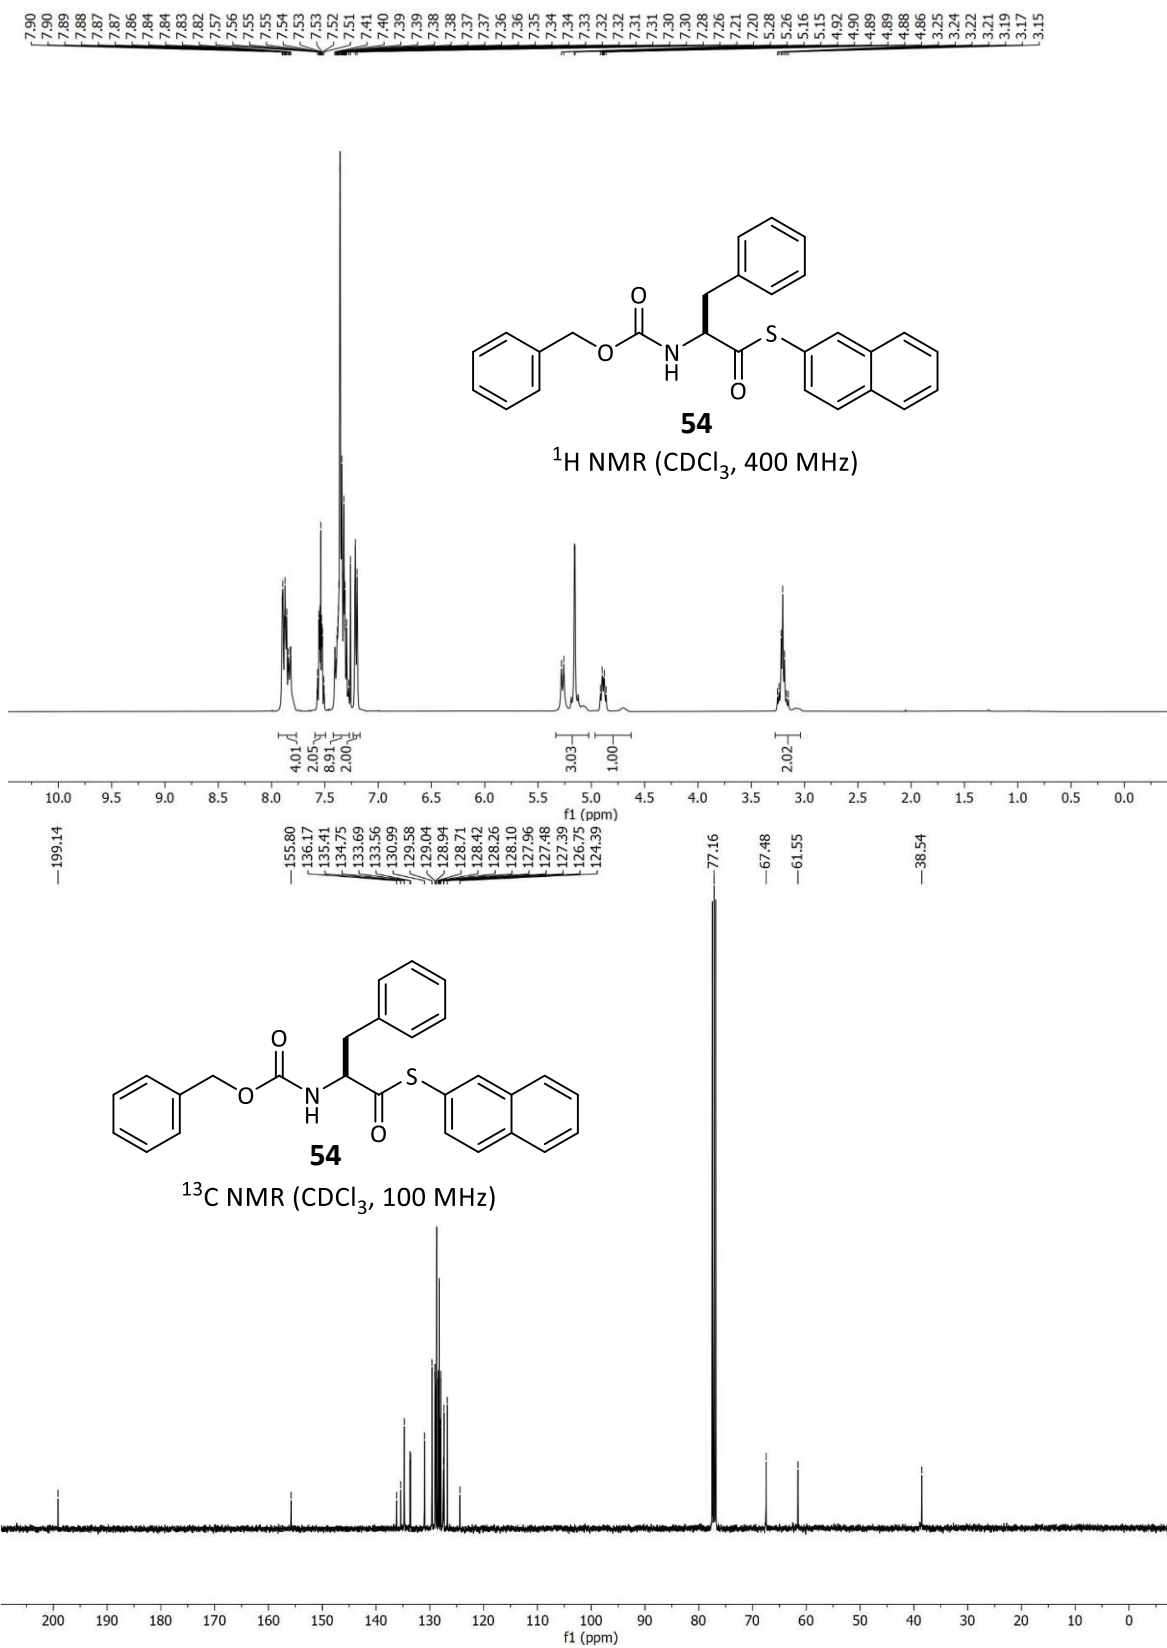





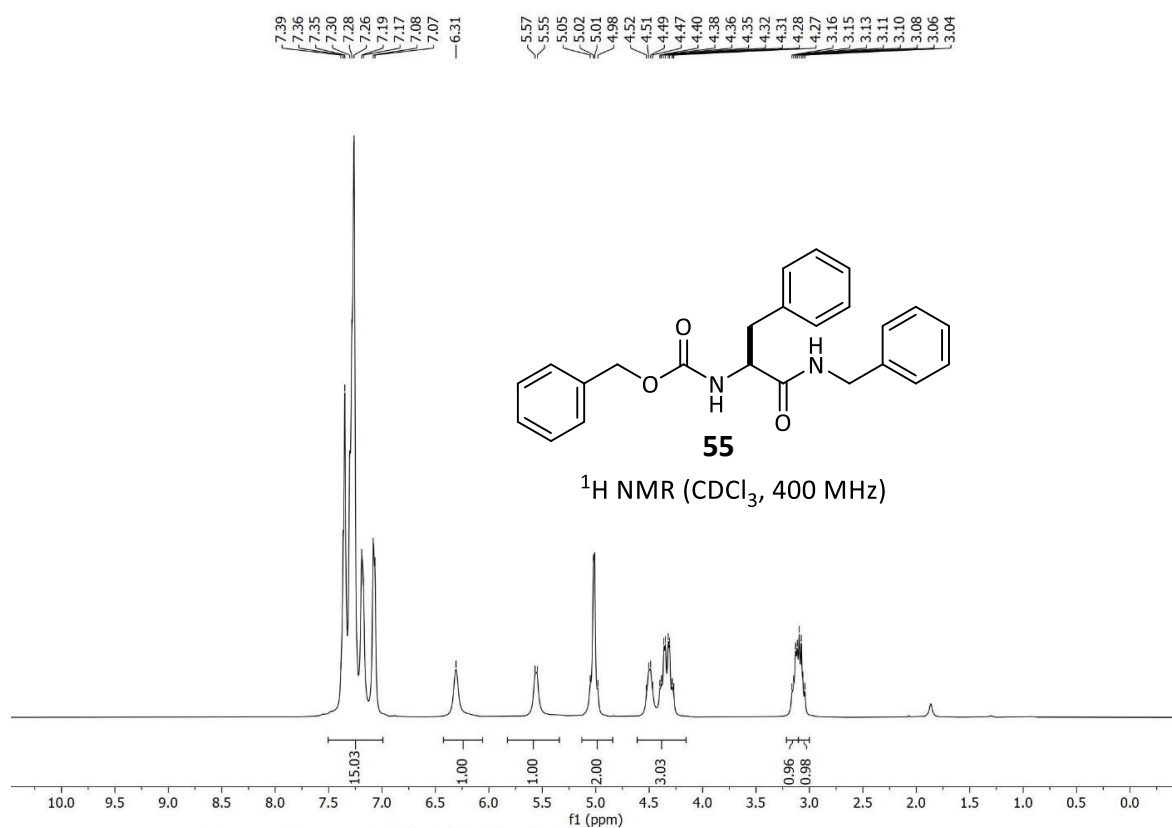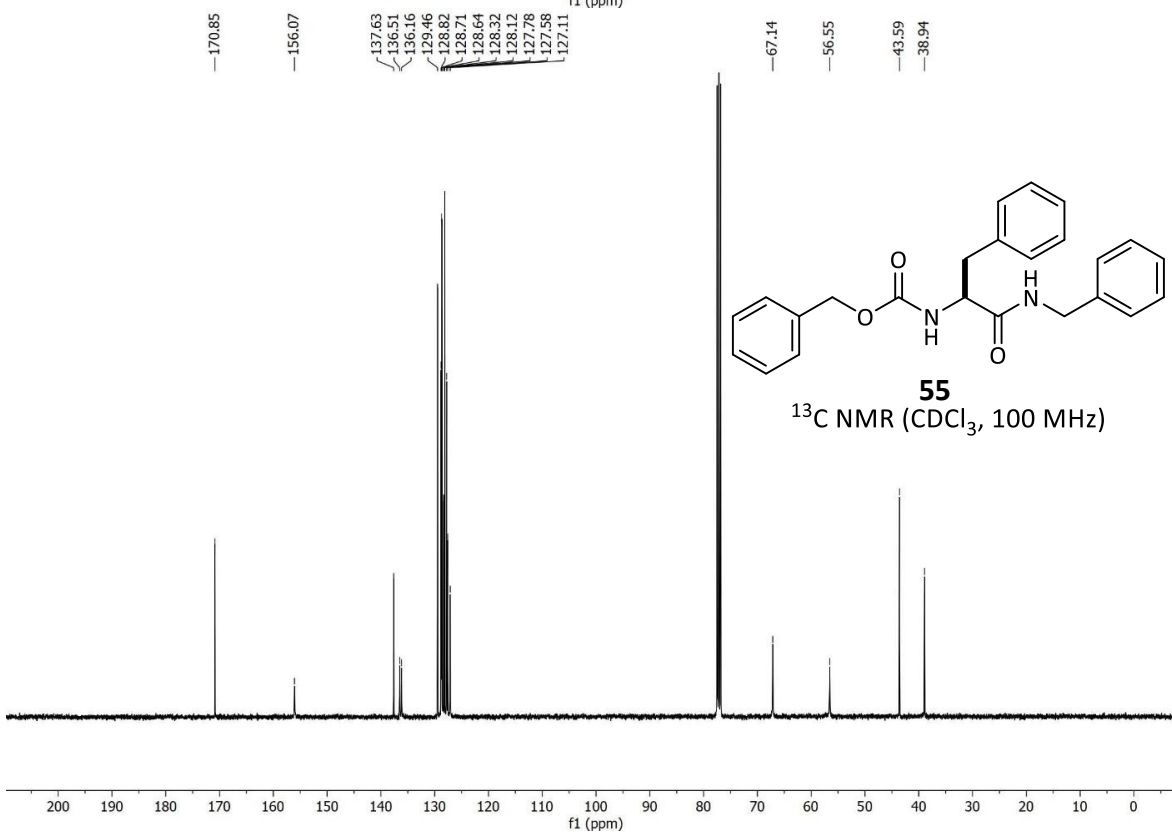

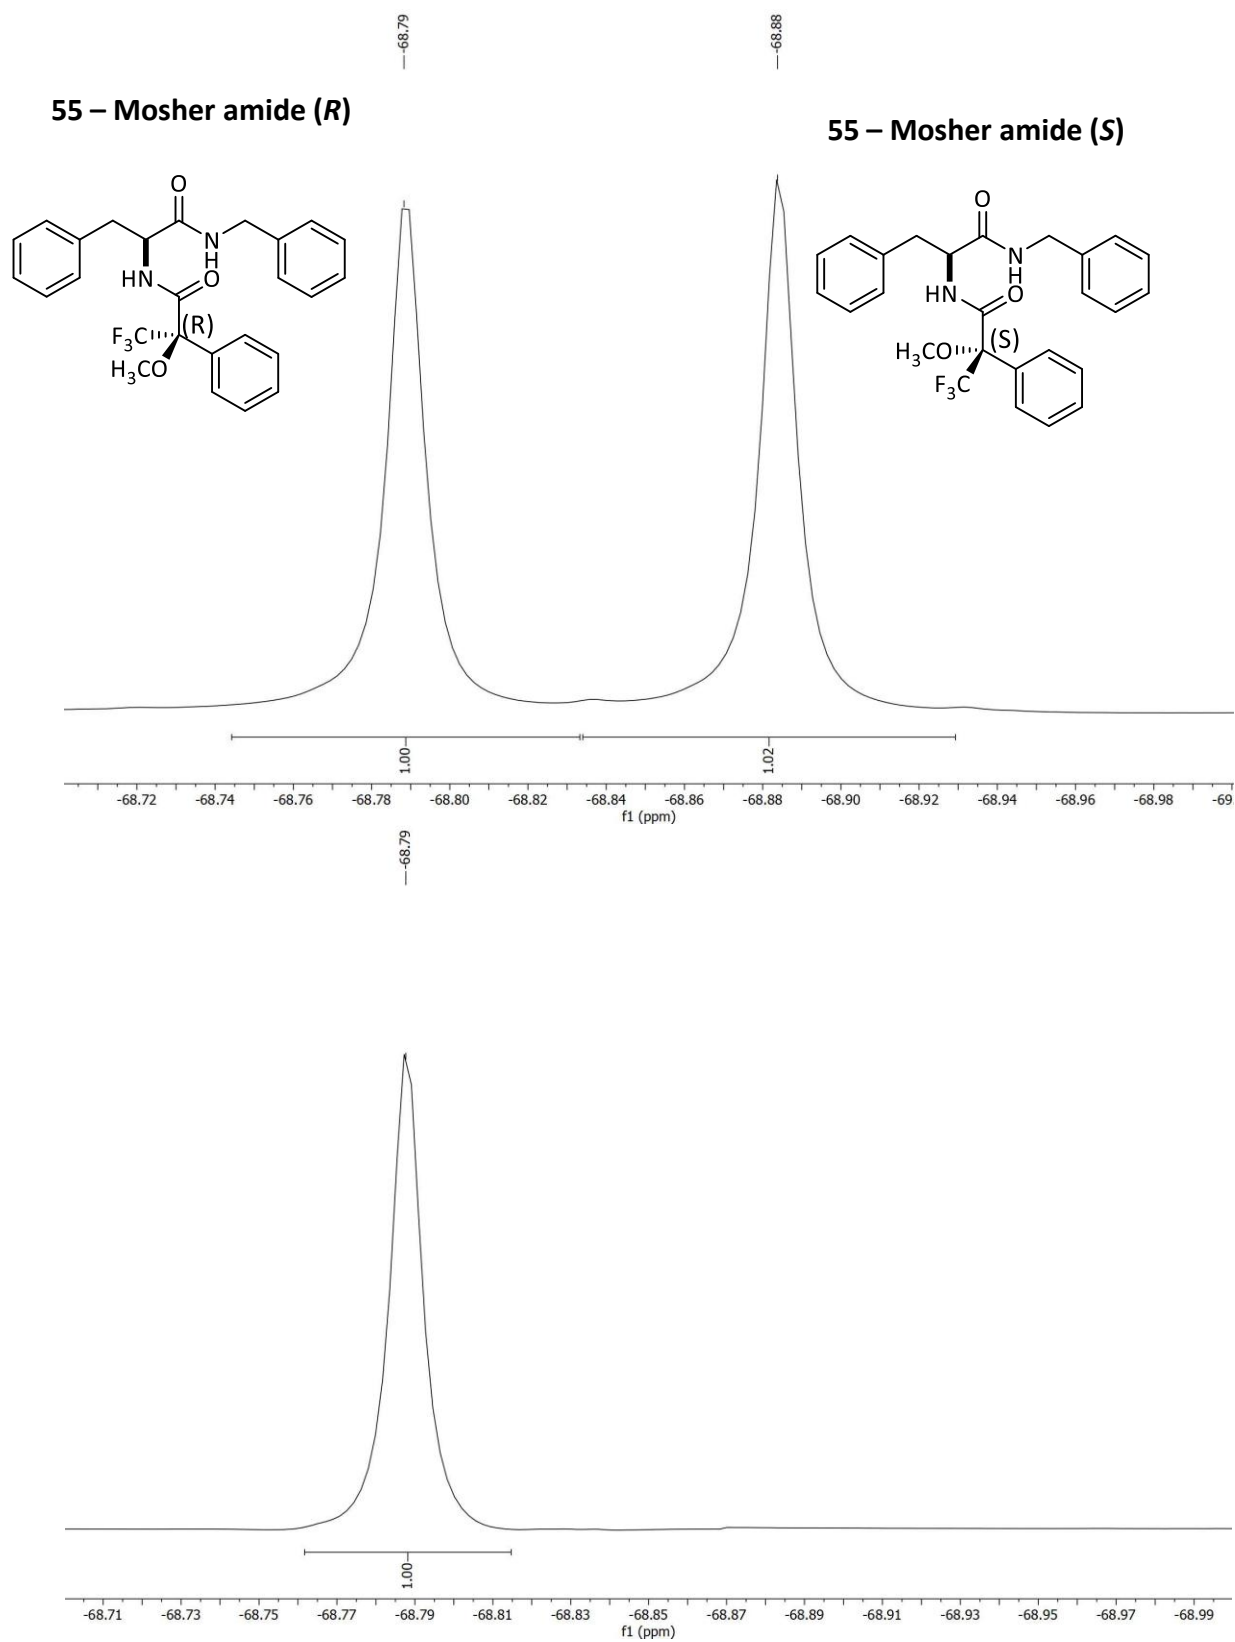

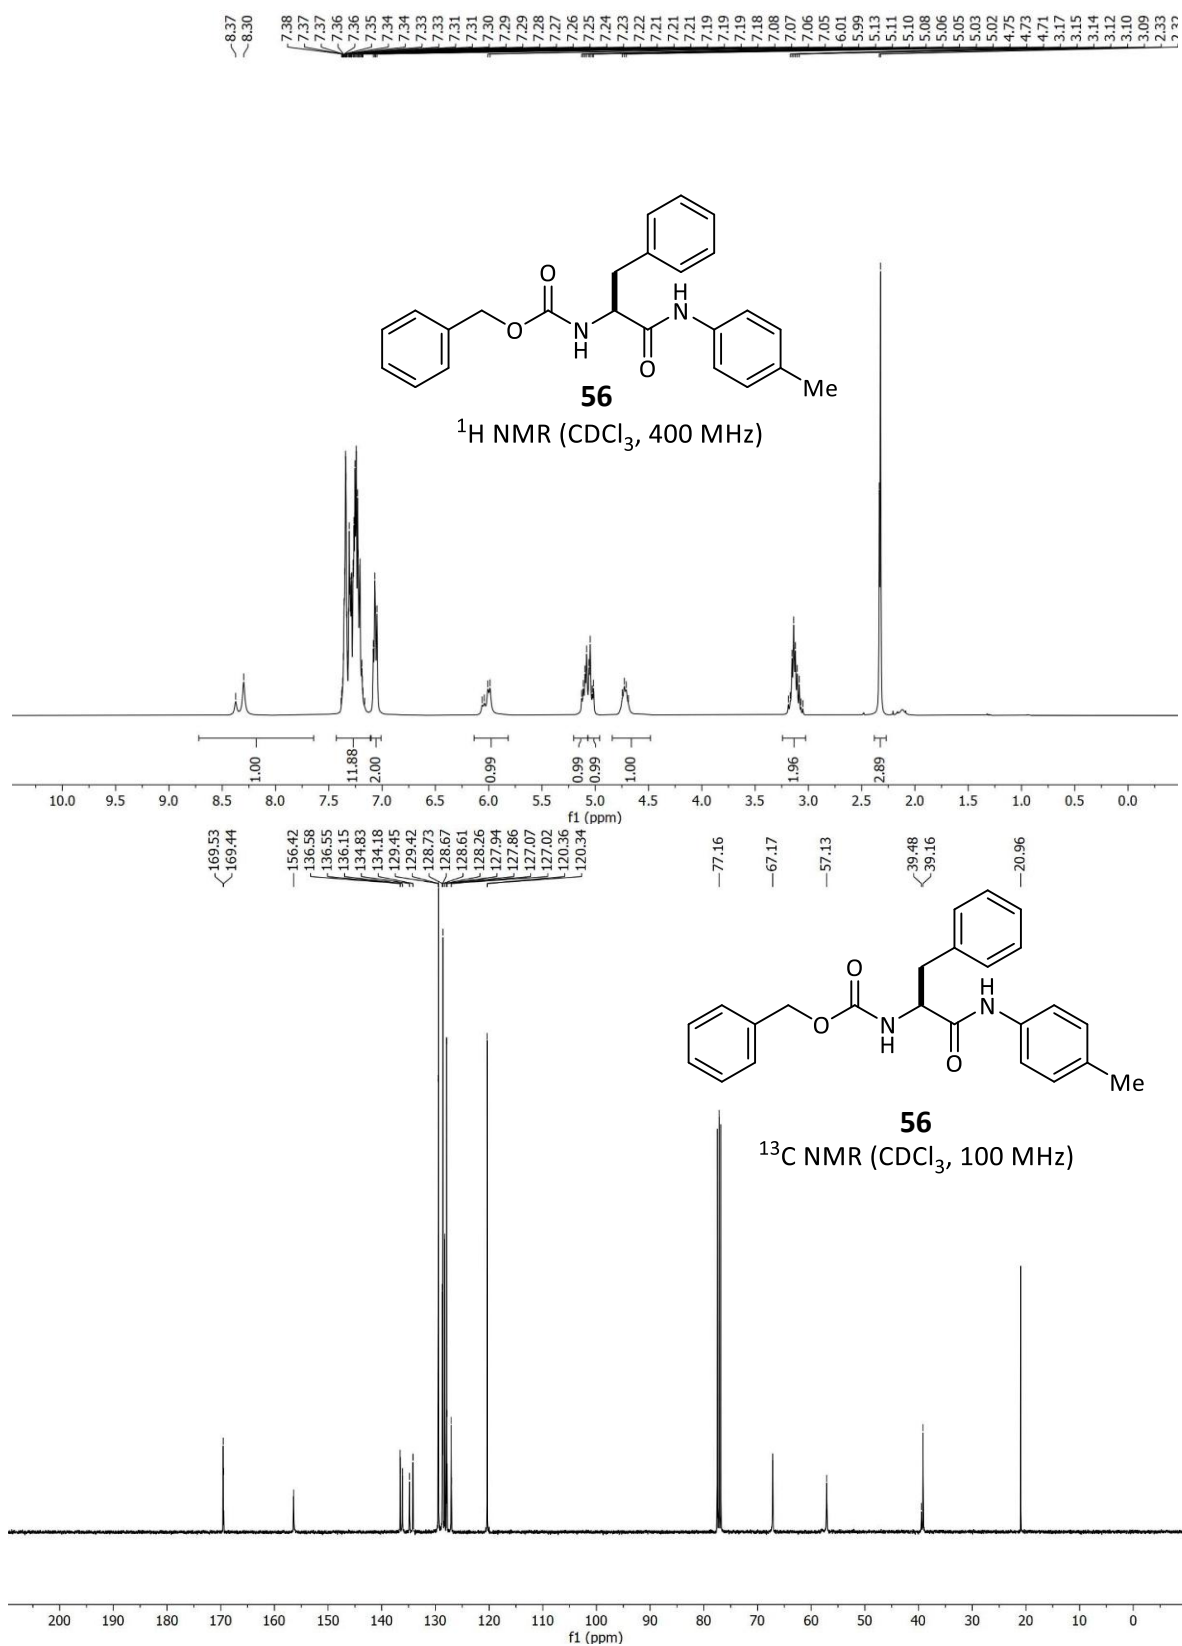

**56 – Mosher amide (*R*)**

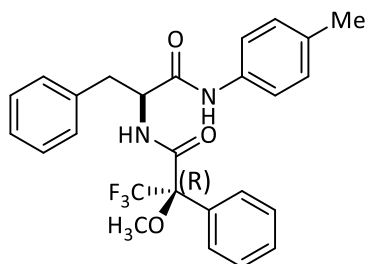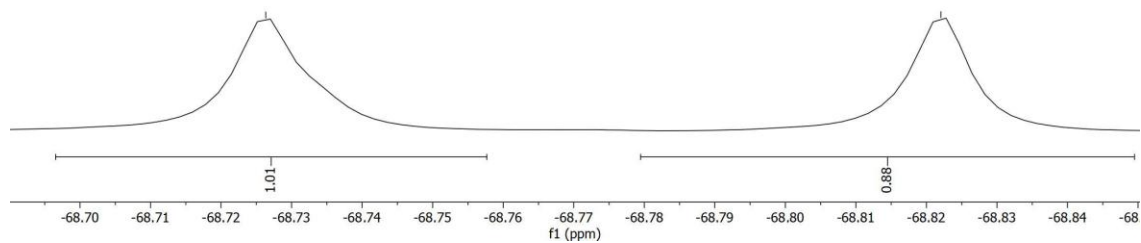

**56 – Mosher amide (*S*)**

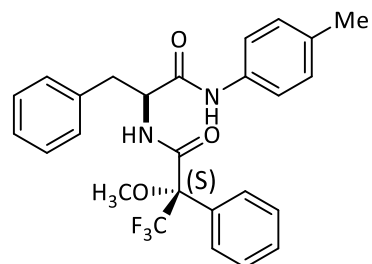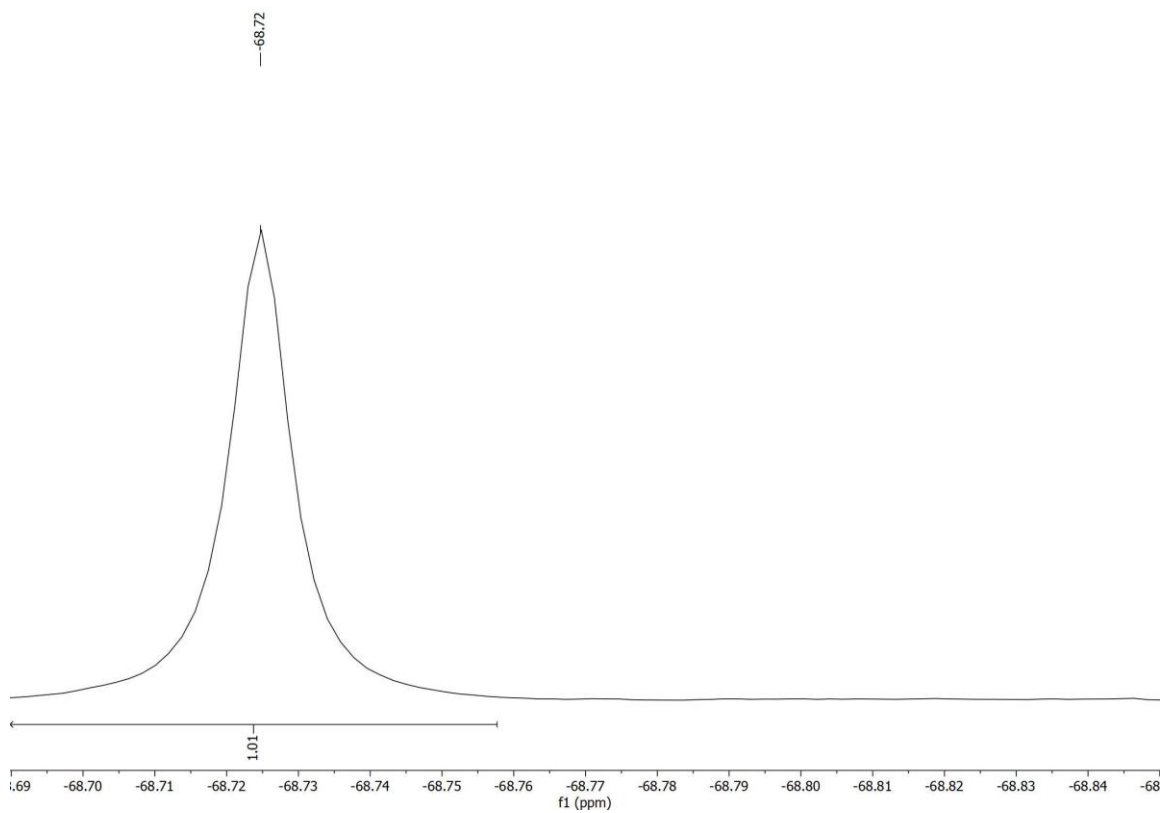

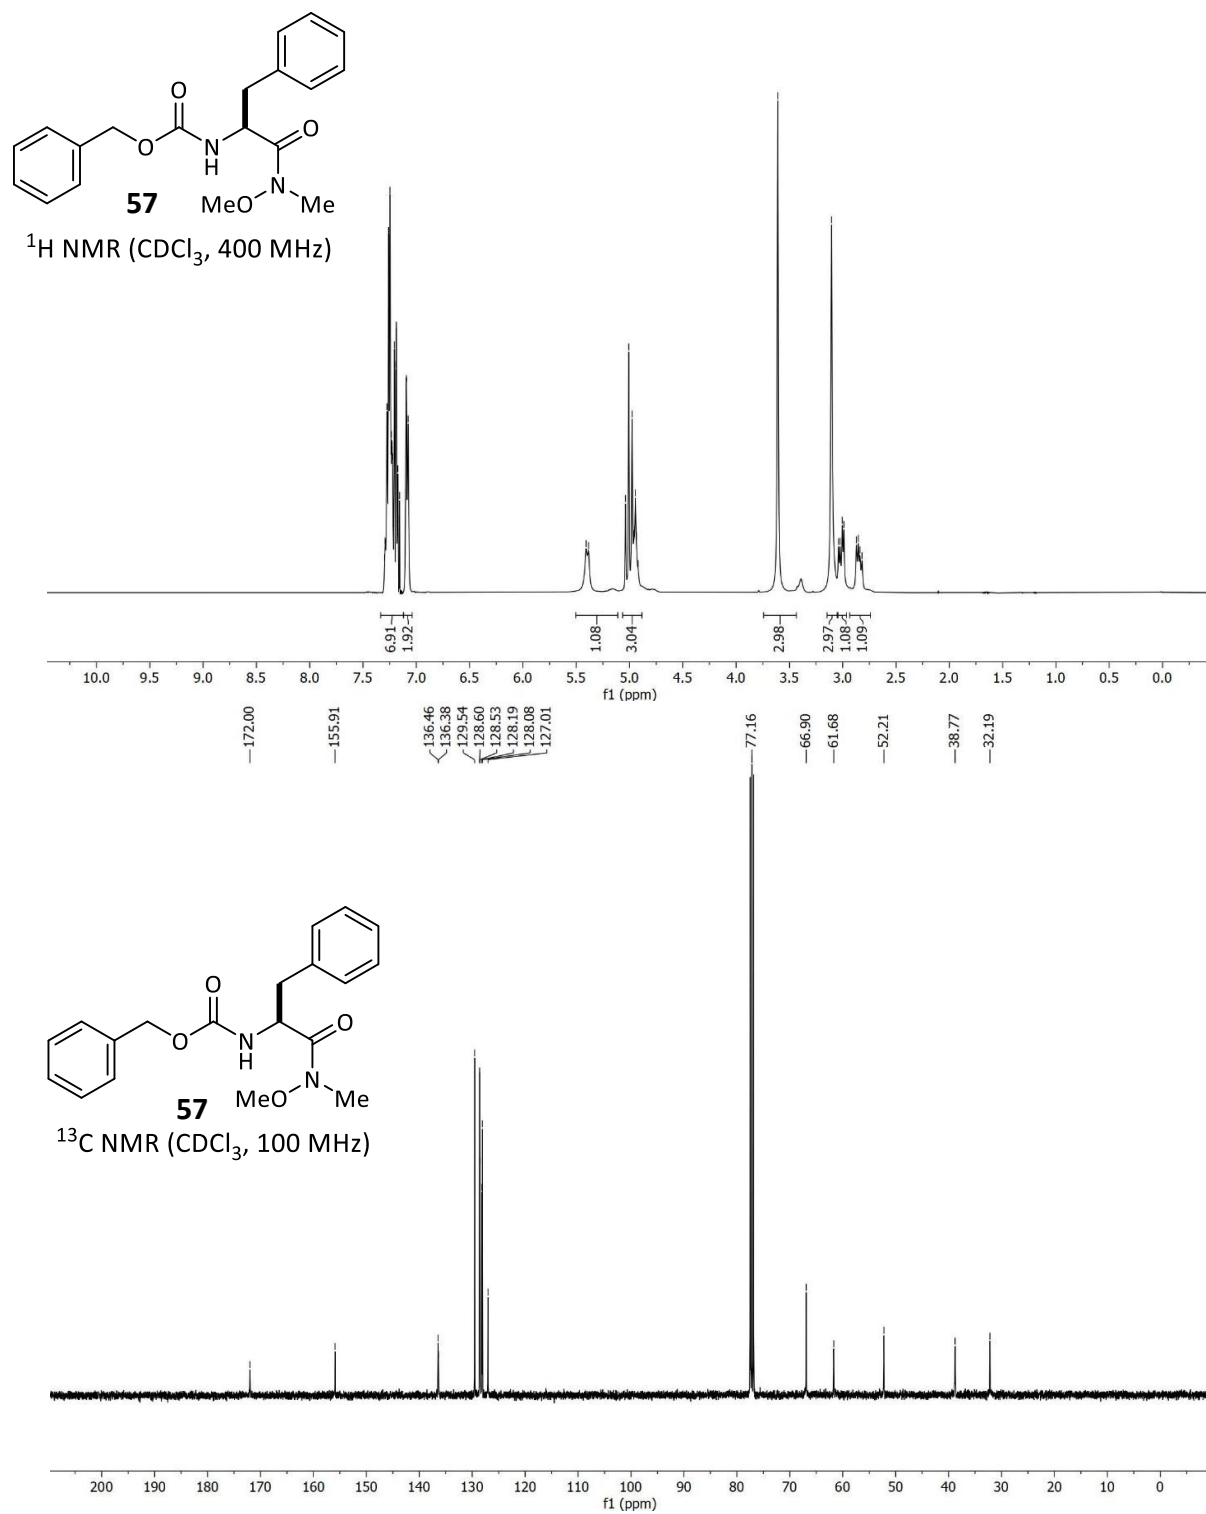

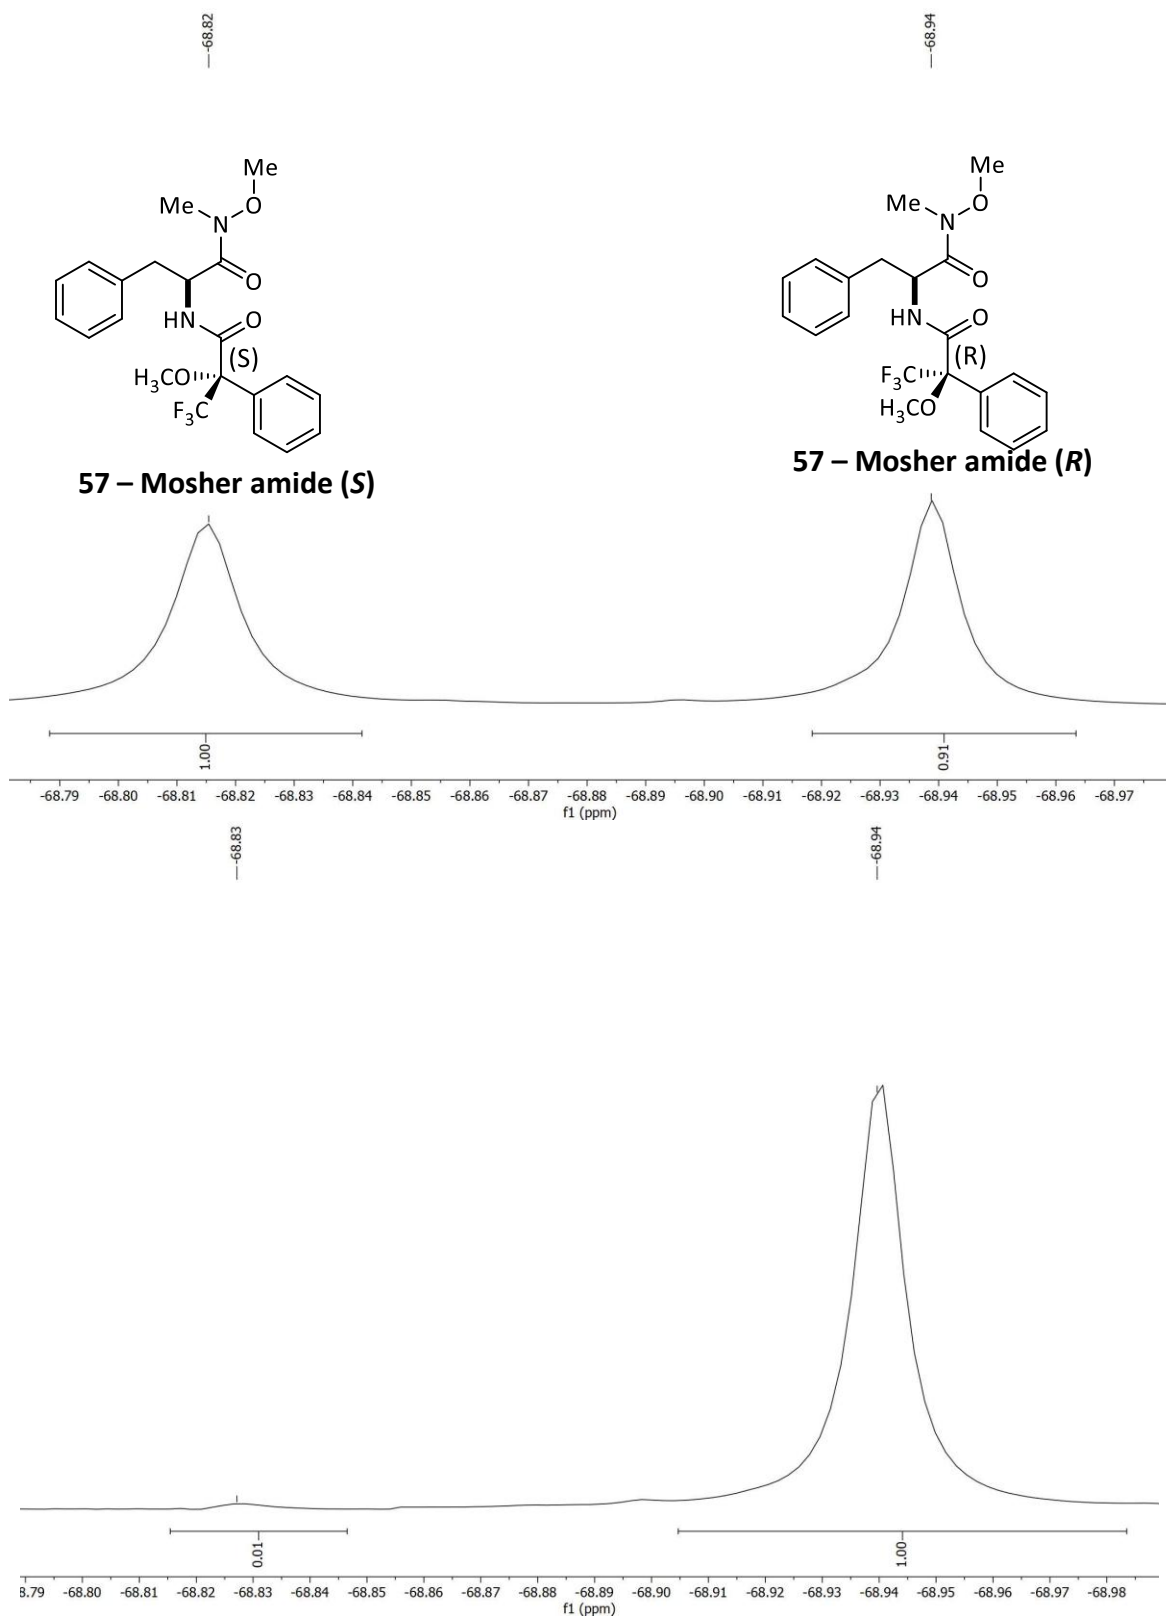

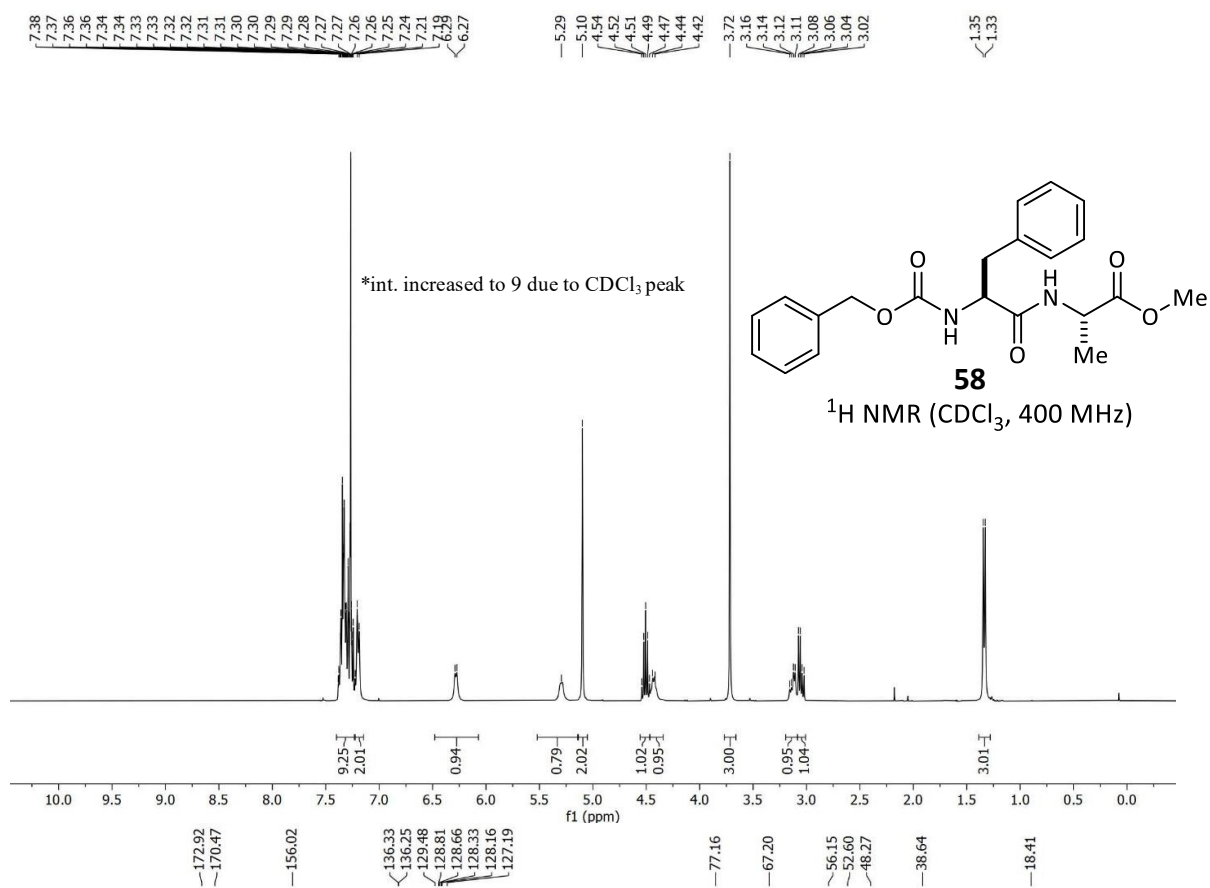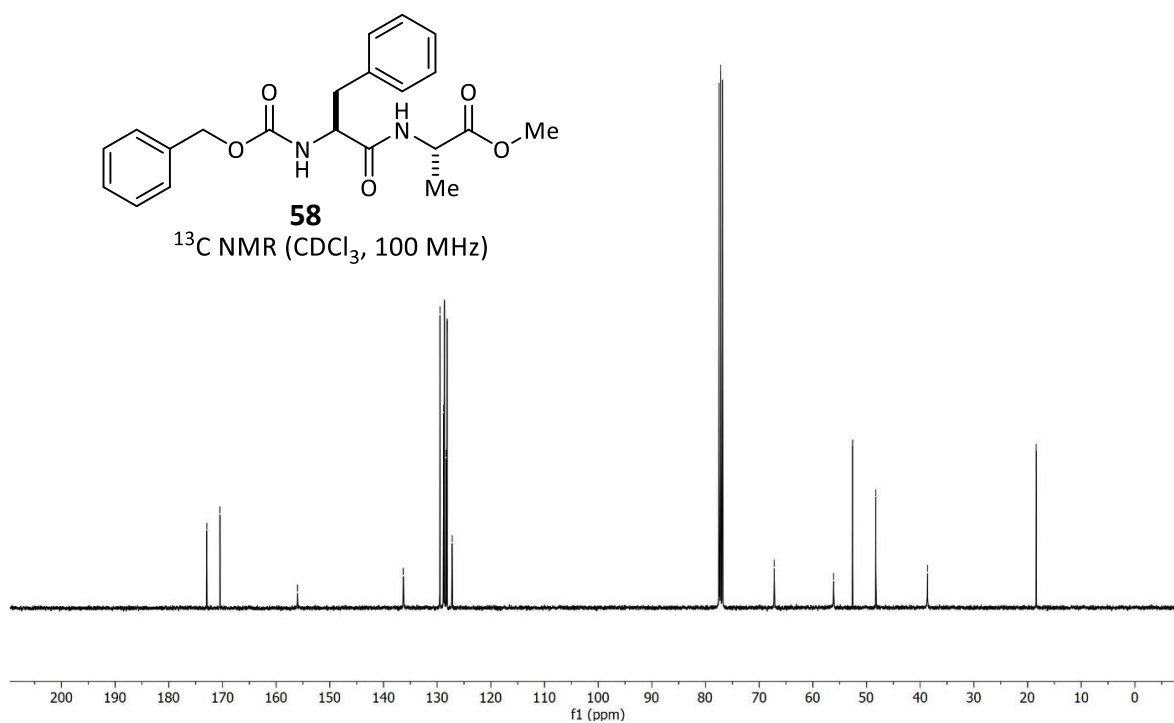



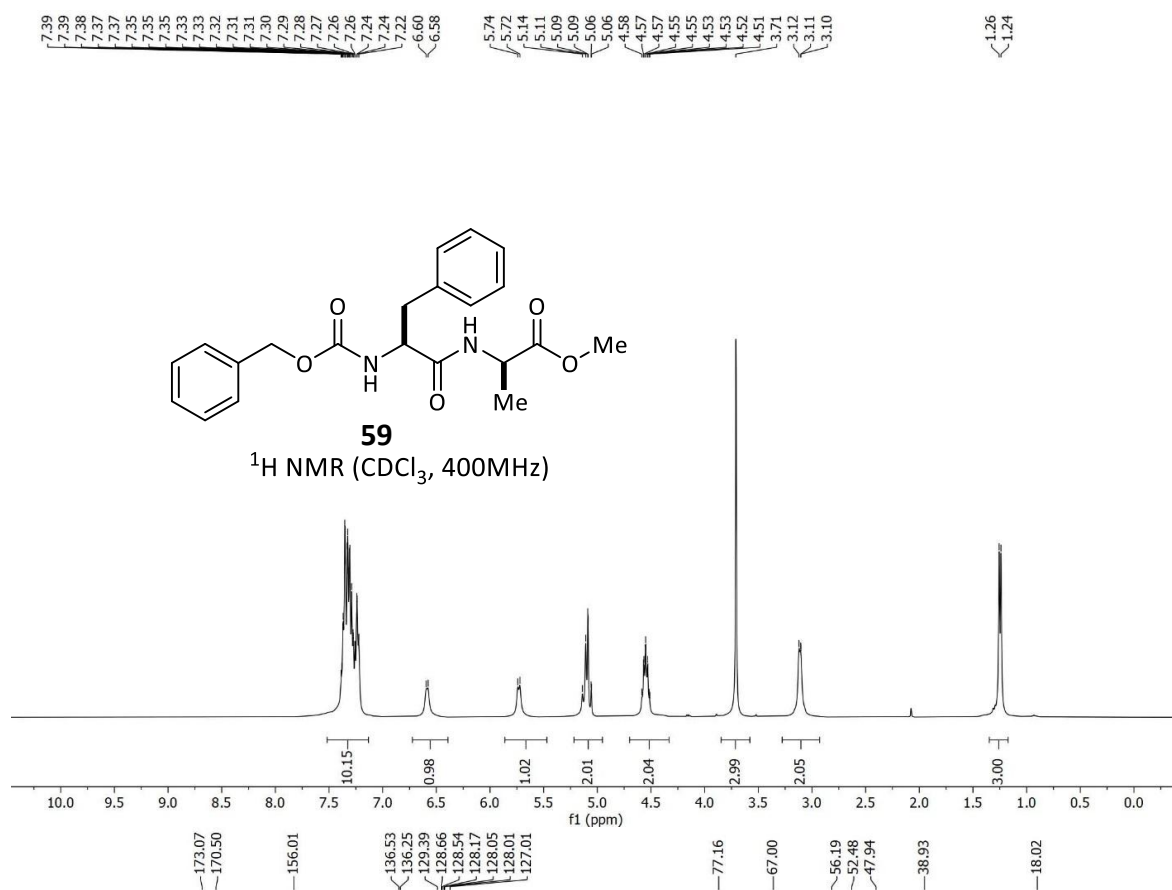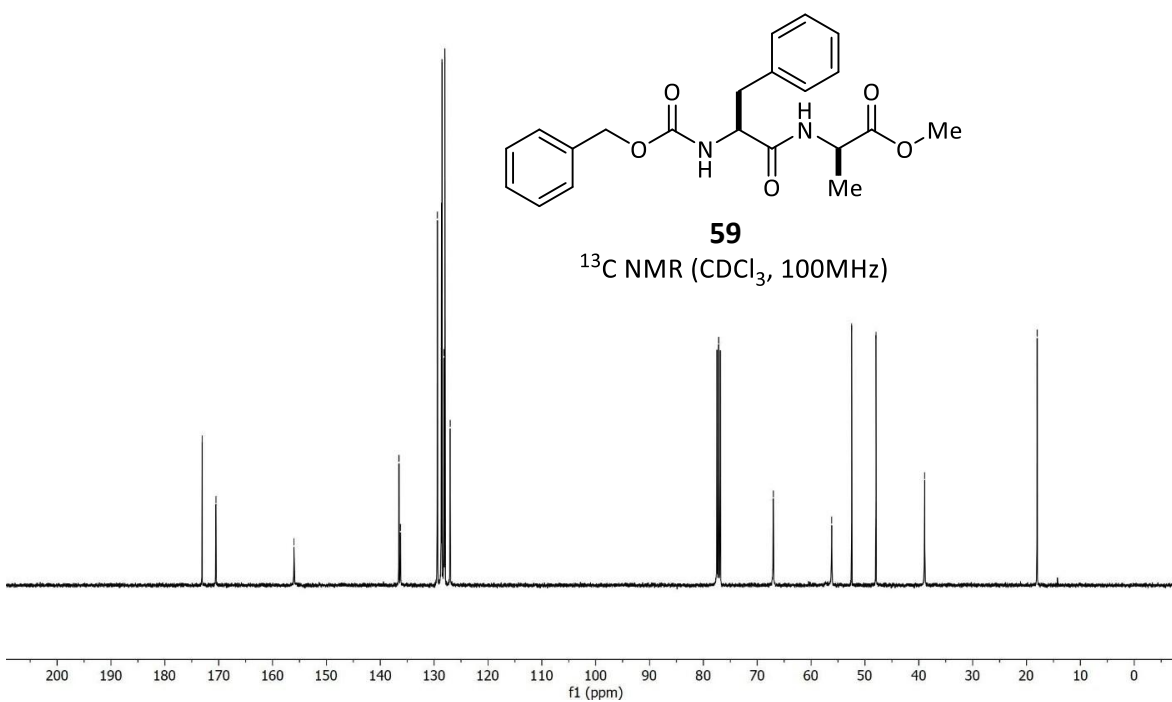

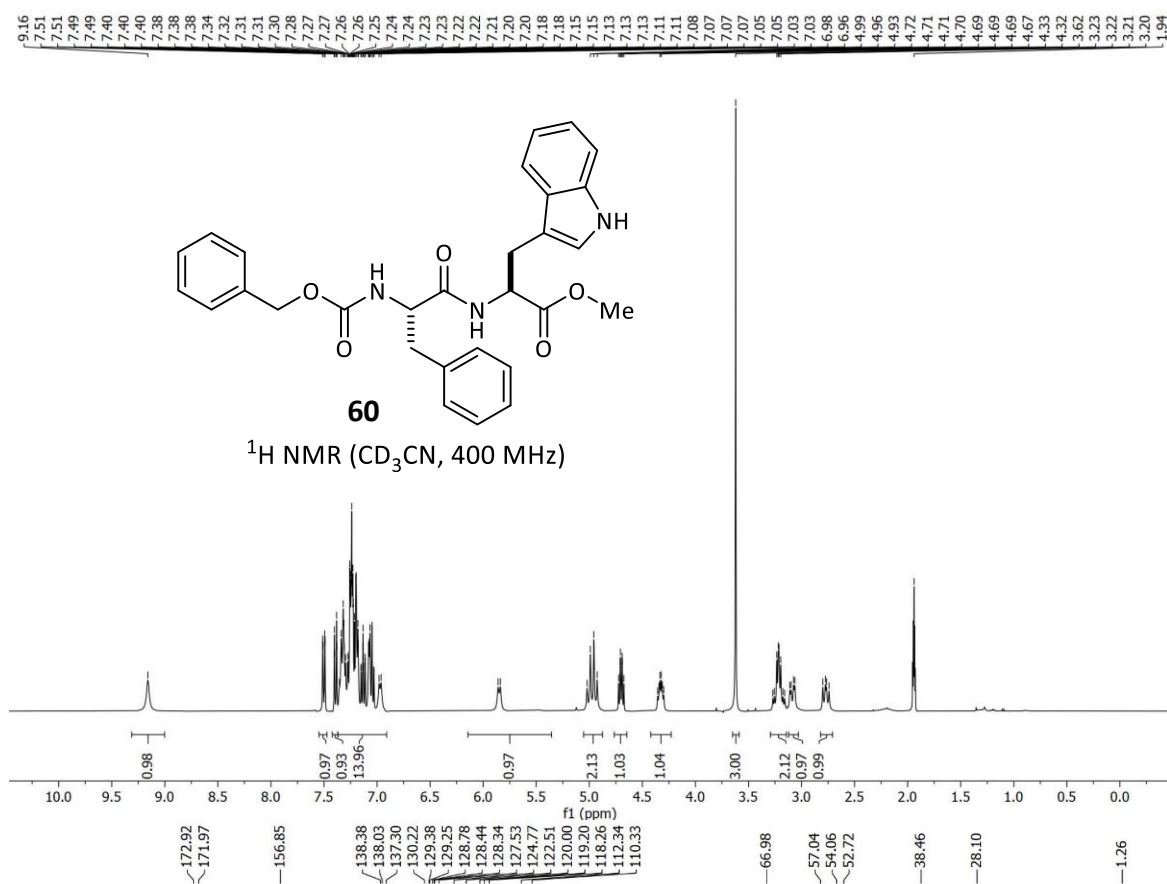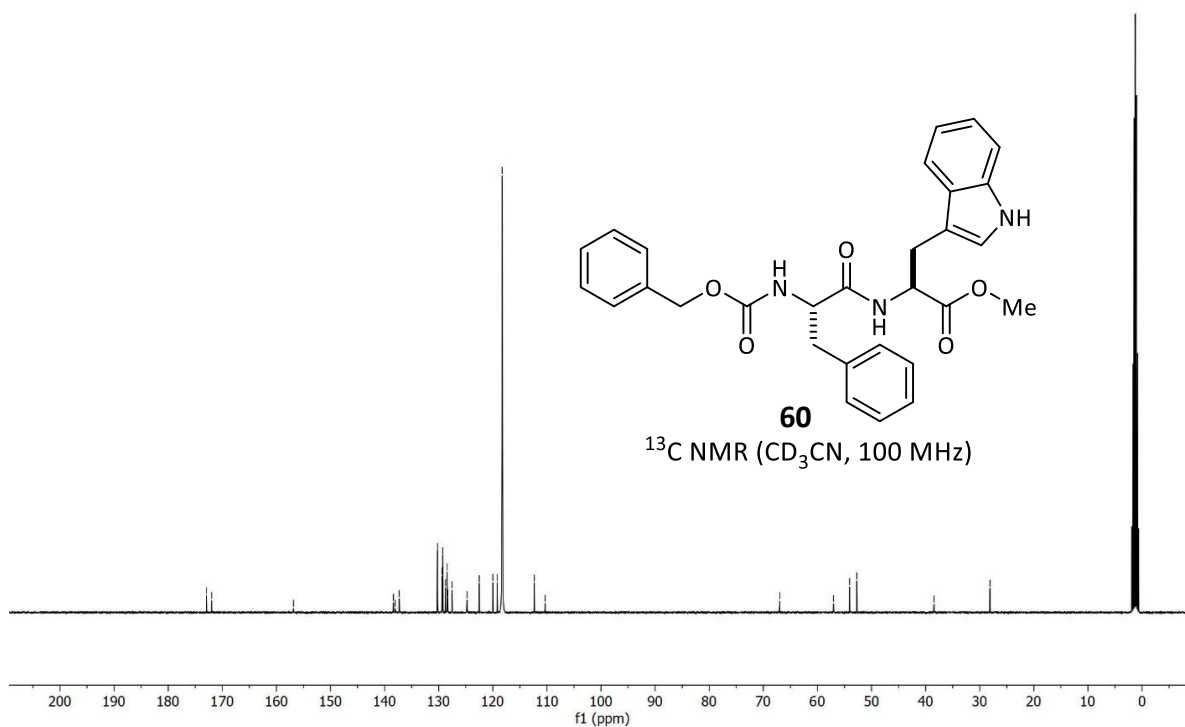

Supplement: d5ob00798d1.pdf [file d5ob00798d1.pdf]
